# Supplementary material for: Integrative subcellular proteomic analysis allows accurate prediction of human disease-causing genes
Source: HighWire-hosted journal article supplement (doi:10.1101/gr.198911.115), 2016-02-24
Supplement: Supplemental_FigureS1.pdf [file Supplemental_FigureS1.pdf]

## Learning

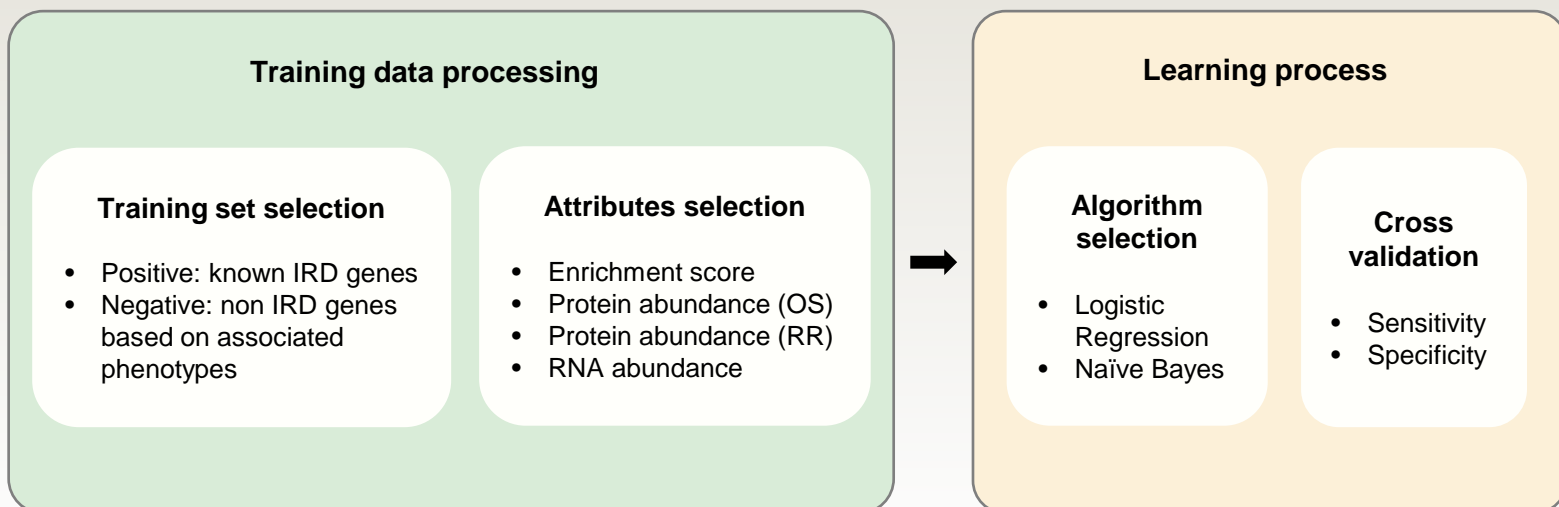

## Prediction

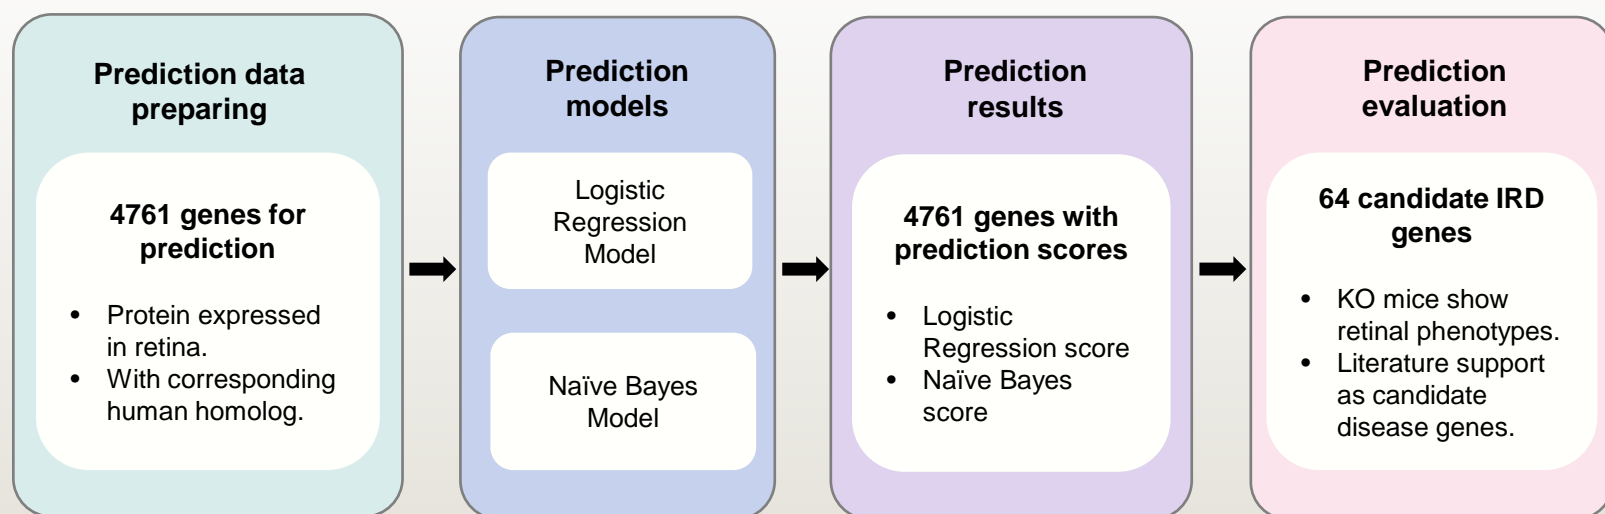

Figure S1. **Workflow of machine learning and prediction process.** IRD: Inherited retinal disease.
