# Supplementary material for: Integrative subcellular proteomic analysis allows accurate prediction of human disease-causing genes
Source: HighWire-hosted journal article supplement (doi:10.1101/gr.198911.115), 2016-02-24
Supplement: Supplemental_Tables.xlsx [file Supplemental_Tables.xlsx]

## Sheet: S1
Table S1. All the mouse protein isoforms identified in the OS and RR of retina
Gene	Protein_ID	Transcript_ID	RNA FPKM	Protein Length	P13_OS_Counts	P15_1_OS_Counts	P15_2_OS_Counts	P15_3_OS_Counts	P15_1_RR_Counts	P15_2_RR_Counts	P13_OS_Normalized	P15_1_OS_Normalized	P15_2_OS_Normalized	P15_3_OS_Normalized	P15_1_RR_Normalized	P15_2_RR_Normalized	Enrichment(OS/RR)
0610007P14Rik	NP_067421	NM_021446	15.1931	140	5	0	0	0	10	0	0.120302	0	0	0	0.250511	0	-0.828
0610009B22Rik	NP_079595	NM_025319	16.2302	140	0	0	0	0	0	5	0	0	0	0	0	0.0829712	-0.92
0610009D07Rik	NP_079599	NM_025323	36.6959	125	0	0	0	0	70	80	0	0	0	0	1.964	1.48684	-4.222
0610010K14Rik	NP_665701	NM_145758	5.63093	171	0	0	0	0	16	13.2	0	0	0	0	0.328154	0.179334	-2.6
0610010K14Rik	NP_001171072	NM_001177601	4.12958	191	0	0	0	0	16	13.2	0	0	0	0	0.293792	0.160556	-2.537
0610010K14Rik	NP_001171074	NM_001177603	7.07066	156	0	0	0	0	16	13.2	0	0	0	0	0.359707	0.196578	-2.545
0610037L13Rik	NP_083030	NM_028754	8.12012	196	0	30	0	10	10	0	0	0.647163	0	0.190754	0.178936	0	0.878
0910001L09Rik	NP_001074577	NM_001081108	20.2344	99	0	45	30	10	0	0	0	1.92188	1.31987	0.377654	0	0	3.501
1110001A16Rik	NP_001170873	NM_001177402	4.49346	80	0	0	0	0	0	10	0	0	0	0	0	0.290399	-1.558
1110007C09Rik	NP_081014	NM_026738	16.668	183	60	10	0	0	10	0	1.10441	0.231046	0	0	0.191647	0	1.414
1110012J17Rik	NP_766551	NM_172963	21.4243	1945	0	0	0	10	40	0	0	0	0	0.0192225	0.0721264	0	-1.664
1110012J17Rik	NP_001107570	NM_001114098	5.59253	1893	0	0	0	10	0	0	0	0	0	0.0197505	0	0	1.599
1110021J02Rik	NP_001157213	NM_001163741	9.37287	104	0	0	0	0	5	0	0	0	0	0	0.168613	0	-0.918
1110021J02Rik	NP_081058	NM_026782	6.79119	97	0	0	0	0	5	0	0	0	0	0	0.180781	0	-0.894
1110037F02Rik	NP_001074652	NM_001081183	8.17441	1861	0	0	0	0	10	30	0	0	0	0	0.0188455	0.0374507	-2.866
1110051M20Rik	NP_780332	NM_175123	35.2906	331	0	20	0	0	0	0	0	0.255476	0	0	0	0	2.19
1190002N15Rik	NP_001028317	NM_001033145	8.98231	430	65	10	0	0	0	0	0.509185	0.0983287	0	0	0	0	3.388
1190005F20Rik	NP_081152	NM_026876	8.68468	728	0	0	10	20	0	0	0	0	0.0598293	0.102714	0	0	2.499
1200014J11Rik	NP_080094	NM_025818	9.97105	615	0	0	0	0	60	70	0	0	0	0	0.342161	0.264429	-4.07
1300001I01Rik	NP_001074627	NM_001081158	5.09837	1353	0	0	0	0	0	30	0	0	0	0	0	0.051512	-2.648
1300018I17Rik	NP_082476	NM_028200	5.80395	649	0	5	0	0	0	0	0	0.0325742	0	0	0	0	1.08
1500001M20Rik	NP_081170	NM_026894	4.38496	337	0	0	0	0	0	20	0	0	0	0	0	0.137875	-2.205
1500003O03Rik	NP_062743	NM_019769	10.959	195	10	5	20	10	10	3.3	0.172741	0.108414	0.446725	0.191732	0.179854	0.0393156	0.745
1500032L24Rik	NP_081190	NM_026914	84.6295	107	0	0	0	0	10	0	0	0	0	0	0.327771	0	-1.566
1700037H04Rik	NP_080367	NM_026091	5.02097	174	0	10	0	0	0	0	0	0.242996	0	0	0	0	1.618
1700047I17Rik2	NP_001093586	NM_001100116	11.6299	207	105	32	10	0	10	0	1.70864	0.653624	0.210414	0	0.169427	0	2.142
1810006K21Rik	NP_081195	NM_026919	82.7073	79	30	0	0	0	40	20	1.27916	0	0	0	1.77577	0.58815	-1.102
1810009A15Rik	NP_079739	NM_025463	221.956	123	10	40	0	0	0	0	0.273858	1.375	0	0	0	0	3.004
1810009N02Rik	NP_081215	NM_026939	339.873	233	10	25	0	20	0	0	0.144569	0.453662	0	0.320925	0	0	3.061
1810013D10Rik	NP_001138905	NM_001145433	7.42044	69	0	0	20	0	0	10	0	0	1.26248	0	0	0.336695	0.264
1810020D17Rik	NP_899074	NM_183251	6.15118	122	0	30	5	5	0	0	0	1.0397	0.178507	0.153229	0	0	2.759
1810020D17Rik	NP_001171416	NM_001177945	3.03183	150	0	30	5	5	0	0	0	0.845627	0.145186	0.124626	0	0	2.784
1810030N24Rik	NP_079747	NM_025471	15.5543	97	0	0	10	0	0	0	0	0	0.449028	0	0	0	1.581
2010012O05Rik	NP_079839	NM_025563	7.77998	105	0	0	10	0	0	0	0	0	0.414816	0	0	0	1.589
2010107E04Rik	NP_081636	NM_027360	275.88	58	25	65	30	0	30	30	1.45192	4.73843	2.25288	0	1.81404	1.20165	0.207
2010107G23Rik	NP_081527	NM_027251	4.39469	120	0	0	10	0	0	0	0	0	0.362964	0	0	0	1.592
2210010C04Rik	NP_075822	NM_023333	0.010508	247	166	175	100	26.6	70	0	2.26382	2.99564	1.76339	0.402638	0.993928	0	1.394
2210018M11Rik	NP_758484	NM_172280	17.7427	1264	95	0	0	0	10	0	0.253167	0	0	0	0.0277464	0	1.718
2310021P13Rik	NP_001239010	NM_001252081	3.32131	1825	0	0	0	6.6	0	0	0	0	0	0.0135211	0	0	1.28
2310021P13Rik	NP_001239011	NM_001252082	4.35141	1798	0	0	0	6.6	0	0	0	0	0	0.0137241	0	0	1.248
2310021P13Rik	NP_082272	NM_027996	8.08604	1832	0	0	0	6.6	0	0	0	0	0	0.0134694	0	0	1.302
2310033P09Rik	NP_077172	NM_024210	7.59551	260	0	0	0	0	20	0	0	0	0	0	0.269781	0	-2.213
2310035C23Rik	NP_775279	NM_173187	6.76095	1216	0	0	0	20	30	35	0	0	0	0.0614931	0.086525	0.0668682	-1.549
2310035C23Rik	NP_083625	NM_029349	3.72274	1192	0	0	0	20	5	35	0	0	0	0.0627312	0.0147112	0.0682146	-1.06
2310047M10Rik	NP_082281	NM_028005	4.53069	360	0	0	30	0	0	0	0	0	0.362964	0	0	0	2.555
2310061I04Rik	NP_001028802	NM_001033630	17.8083	315	0	30	0	0	0	0	0	0.402679	0	0	0	0	2.51
2400003C14Rik	NP_082294	NM_028018	27.1379	362	0	0	0	70	0	30	0	0	0	0.722968	0	0.19253	0.37
2410002F23Rik	NP_080156	NM_025880	15.8142	284	30	0	0	0	0	0	0.355823	0	0	0	0	0	2.544
2410016O06Rik	NP_076122	NM_023633	1.588	603	0	0	0	0	0	10	0	0	0	0	0	0.0385273	-1.548
2510003E04Rik	NP_082473	NM_028197	26.8909	617	0	0	0	60	0	0	0	0	0	0.363577	0	0	3.178
2610002M06Rik	NP_080197	NM_025921	5.38917	199	0	7	0	0	0	10	0	0.148728	0	0	0	0.116743	-0.588
2610018G03Rik	NP_598490	NM_133729	0.382087	416	10	0	0	0	0	0	0.0809725	0	0	0	0	0	1.6
2610027L16Rik	NP_080679	NM_026403	1.90143	636	0	0	0	0	0	10	0	0	0	0	0	0.0365282	-1.566
2610034B18Rik	NP_081696	NM_027420	7.74906	226	0	35	0	0	0	10	0	0.654799	0	0	0	0.102796	0.784
2610034M16Rik	NP_081277	NM_027001	7.71129	1238	0	0	0	30	0	0	0	0	0	0.0906005	0	0	2.531
2610301G19Rik	NP_666167	NM_146055	17.3163	922	0	20	50	50	360	440	0	0.0917166	0.236202	0.202754	1.36939	1.10868	-2.394
2700060E02Rik	NP_080804	NM_026528	37.2594	244	0	0	0	0	30	80	0	0	0	0	0.431207	0.761703	-3.916
2700094K13Rik	NP_001028338	NM_001033166	8.87404	116	0	0	0	0	0	50	0	0	0	0	0	1.00138	-3.118
2810405K02Rik	NP_079858	NM_025582	8.46974	201	35	0	20	20	40	0	0.586547	0	0.43339	0.372018	0.69794	0	0.124
2810407C02Rik	NP_001035486	NM_001040396	53.0964	195	0	20	0	10	40	40	0	0.433655	0	0.191732	0.719415	0.476552	-1.42
2810408M09Rik	NP_001007582	NM_001007581	2.9635	244	0	0	0	0	0	10	0	0	0	0	0	0.0952128	-1.562
2900010M23Rik	NP_080339	NM_026063	38.8292	136	0	35	20	0	10	0	0	1.08812	0.640525	0	0.257878	0	1.189
3830431G21Rik	NP_001170974	NM_001177503	7.29305	505	0	0	0	10	0	0	0	0	0	0.0740352	0	0	1.61
4632415K11Rik	NP_083159	NM_028883	14.4743	455	70	10	0	0	10	0	0.518224	0.092926	0	0	0.0770802	0	1.543
4732456N10Rik	NP_808385	NM_177717	0.007649	538	0	0	0	0	0	23.1	0	0	0	0	0	0.0997505	-2.357
4930485B16Rik	XP_994223	XM_989129	0.708511	2458	0	0	0	0	0	10	0	0	0	0	0	0.00945156	-1.55
4930506M07Rik	NP_780381	NM_175172	5.62717	456	0	0	20	0	0	0	0	0	0.191034	0	0	0	2.179
4930506M07Rik	NP_001107784	NM_001114312	2.15922	631	0	0	0	10	0	0	0	0	0	0.0592516	0	0	1.632
4930572J05Rik	NP_941009	NM_198607	5.51133	207	0	0	10	0	10	10	0	0	0.210414	0	0.169427	0.112232	-0.932
4931406C07Rik	NP_001186414	NM_001199485	5.87401	315	10	0	0	10	0	0	0.106935	0	0	0.118691	0	0	2.14
4932438A13Rik	NP_766267	NM_172679	17.263	5005	195	0	0	0	0	0	0.131239	0	0	0	0	0	4.333
4933405O20Rik	NP_766489	NM_172901	0.028825	396	0	0	10	0	0	0	0	0	0.109989	0	0	0	1.604
4933407C03Rik	NP_001156734	NM_001163262	8.21234	773	0	0	0	0	0	5	0	0	0	0	0	0.0150271	-0.898
4933407C03Rik	NP_083217	NM_028941	7.84245	685	0	0	0	0	0	5	0	0	0	0	0	0.0169576	-0.916
4933427D14Rik	NP_083239	NM_028963	4.082	959	60	0	0	0	0	0	0.210748	0	0	0	0	0	3.202
5033414D02Rik	NP_080638	NM_026362	12.8403	147	35	40	20	10	20	20	0.802013	1.15051	0.592595	0.254339	0.477163	0.316081	0.473
5730419I09Rik	NP_001103158	NM_001109688	5.96413	990	0	0	0	16.5	20	16.5	0	0	0	0.062313	0.0708515	0.0387199	-1.135
5730419I09Rik	NP_083357	NM_029081	2.56381	1016	0	0	0	16.5	20	16.5	0	0	0	0.0607184	0.0690383	0.037729	-1.126
5730469M10Rik	NP_081740	NM_027464	21.3899	218	85	25	60	0	100	130	1.31339	0.484878	1.19878	0	1.60878	1.38539	-0.795
5730494N06Rik	NP_081754	NM_027478	27.4482	120	15	25	30	0	40	10	0.421057	0.880861	1.08889	0	1.16905	0.193599	-0.141
5830418K08Rik	NP_795950	NM_176976	6.55539	2380	0	0	0	0	0	50	0	0	0	0	0	0.0488066	-3.098
6330407J23Rik	NP_080414	NM_026138	8.63397	945	0	30	40	10	60	60	0	0.134226	0.184363	0.0395638	0.222676	0.147504	-0.897
6430527G18Rik	NP_665835	NM_145836	5.10389	775	0	0	0	0	10	0	0	0	0	0	0.0452535	0	-1.568
6430548M08Rik	NP_001157233	NM_001163761	1.8921	397	0	32	10	30	25	80	0	0.340807	0.109712	0.282527	0.220853	0.46815	-0.861
6430548M08Rik	NP_758490	NM_172286	22.6257	407	5	37	10	30	25	80	0.0413815	0.384376	0.107016	0.275586	0.215427	0.456647	-0.748
6430571L13Rik	NP_780695	NM_175486	8.24907	164	35	0	0	0	0	0	0.718878	0	0	0	0	0	2.681
6430704M03Rik	NP_001136437	NM_001142965	5.94492	293	0	0	0	0	0	10	0	0	0	0	0	0.0792899	-1.555
8430419L09Rik	NP_083258	NM_028982	9.59789	624	0	0	50	0	0	0	0	0	0.349004	0	0	0	3.003
8430427H17Rik	NP_001001986	NM_001001986	25.8329	435	0	0	0	0	0	10	0	0	0	0	0	0.0534067	-1.539
8430427H17Rik	NP_001127772	NM_001134300	1.93841	679	0	0	0	0	0	10	0	0	0	0	0	0.0342149	-1.555
9030624J02Rik	NP_082091	NM_027815	9.39738	991	0	0	0	0	0	40	0	0	0	0	0	0.0937717	-2.883
9330182L06Rik	NP_766294	NM_172706	3.68544	1028	0	35	50	0	0	0	0	0.143954	0.211847	0	0	0	3.512
9430016H08Rik	NP_001074650	NM_001081181	7.52165	291	0	0	20	0	0	20	0	0	0.299352	0	0	0.15967	-0.402
9530053A07Rik	NP_001158127	NM_001164655	0.027668	2581	55	47	30	0	15	50	0.0717803	0.0769943	0.0506266	0	0.0203825	0.0450057	0.221
9630033F20Rik	NP_795977	NM_177003	8.38002	269	0	15	0	10	0	0	0	0.23577	0	0.138988	0	0	2.347
A130022J15Rik	NP_780522	NM_175313	4.67919	527	0	0	0	0	0	20	0	0	0	0	0	0.0881667	-2.213
A230046K03Rik	NP_001028547	NM_001033375	10.26	1173	0	0	0	0	0	70	0	0	0	0	0	0.138639	-3.429
A2ld1	NP_663441	NM_145466	8.58404	149	0	0	0	10	0	0	0	0	0	0.250925	0	0	1.594
A2m	NP_783327	NM_175628	1.92288	1474	0	45	0	20	0	0	0	0.129081	0	0.0507297	0	0	3.266
A330021E22Rik	NP_766035	NM_172447	5.36782	942	0	0	0	0	10	0	0	0	0	0	0.0372309	0	-1.542
A430005L14Rik	NP_780496	NM_175287	6.80323	230	0	0	0	0	10	0	0	0	0	0	0.152485	0	-1.556
Aaas	NP_700465	NM_153416	5.66869	546	0	0	0	0	20	0	0	0	0	0	0.128467	0	-2.229
Aak1	NP_001035195	NM_001040106	16.3641	959	0	67	80	60	45	70	0	0.295396	0.363343	0.233917	0.164569	0.169576	0.098
Aak1	NP_808430	NM_177762	0.783416	878	0	67	50	0	45	70	0	0.322648	0.248039	0	0.179751	0.18522	-0.467
Aars	NP_666329	NM_146217	24.9883	968	190	170	170	200	130	380	0.661164	0.742544	0.764925	0.772475	0.471001	0.911997	-0.143
Aars2	NP_941010	NM_198608	4.26984	980	5	30	0	0	20	0	0.017186	0.129433	0	0	0.0715744	0	0.083
Aarsd1	NP_659078	NM_144829	12.9148	412	0	20	0	50	10	20	0	0.205249	0	0.453735	0.0851249	0.112776	0.39
Abat	NP_766549	NM_172961	18.4741	500	0	40	30	0	65	190	0	0.338251	0.261334	0	0.455929	0.882813	-1.769
Abat	NP_001164449	NM_001170978	2.25178	444	0	40	30	0	65	0	0	0.380913	0.294295	0	0.513434	0	-0.406
Abca1	NP_038482	NM_013454	5.84743	2261	0	10	0	0	0	0	0	0.0187003	0	0	0	0	1.598
Abca2	NP_031405	NM_007379	8.85266	2433	0	60	0	0	0	0	0	0.10427	0	0	0	0	3.207
Abca4	NP_031404	NM_007378	85.5357	2310	370	1252	750	710	100	300	0.539536	2.29161	1.41415	1.14915	0.151825	0.301713	1.918
Abca5	NP_671752	NM_147219	8.03983	1642	0	5	0	0	0	0	0	0.0128749	0	0	0	0	1.106
Abca6	NP_671751	NM_147218	0.62489	1624	0	0	0	10	0	0	0	0	0	0.023022	0	0	1.582
Abca7	NP_038878	NM_013850	2.18199	2159	0	17	0	0	0	0	0	0.0332924	0	0	0	0	2.067
Abca8a	NP_694785	NM_153145	22.8301	1619	0	0	0	10	0	0	0	0	0	0.0230931	0	0	1.611
Abca8b	NP_038879	NM_013851	2.8916	1620	0	0	0	10	0	40	0	0	0	0.0230789	0	0.0573628	-1.663
Abca8b	NP_038879	NM_013851	2.8916	1620	0	0	0	10	0	40	0	0	0	0.0230789	0	0.0573628	-1.67
Abca9	NP_671753	NM_147220	0.466076	1623	0	0	0	10	0	0	0	0	0	0.0230362	0	0	1.612
Abcb1a	NP_035206	NM_011076	1.08685	1276	0	0	0	5	15	70	0	0	0	0.0146504	0.0412282	0.127448	-2.914
Abcb1b	NP_035205	NM_011075	0.289626	1276	0	0	0	0	55	0	0	0	0	0	0.15117	0	-3.226
Abcb5	NP_084237	NM_029961	0	1255	0	0	0	5	0	0	0	0	0	0.0148955	0	0	1.104
Abcb6	NP_076221	NM_023732	4.46971	842	0	15	0	0	10	10	0	0.075323	0	0	0.0416526	0.0275914	-0.609
Abcb7	NP_033722	NM_009592	7.47623	752	0	0	0	0	10	20	0	0	0	0	0.0466376	0.0617871	-2.583
Abcb8	NP_083296	NM_029020	6.33873	717	0	0	0	0	0	10	0	0	0	0	0	0.0324016	-1.551
Abcc1	NP_032602	NM_008576	5.22716	1528	0	30	0	50	0	20	0	0.0830131	0	0.122342	0	0.0304083	0.883
Abcc4	NP_001028508	NM_001033336	3.1e-05	1325	0	0	0	0	0	9.9	0	0	0	0	0	0.0173582	-1.528
Abcc4	NP_001157147	NM_001163675	0.655946	1282	0	0	0	0	0	9.9	0	0	0	0	0	0.0179404	-1.537
Abcc4	NP_001157148	NM_001163676	0.078708	1250	0	0	0	20	0	9.9	0	0	0	0.0598205	0	0.0183997	0.276
Abcc8	NP_035640	NM_011510	2.3205	1588	0	0	0	10	0	0	0	0	0	0.0235439	0	0	1.574
Abcd3	NP_033017	NM_008991	15.0348	659	0	0	0	0	20	50	0	0	0	0	0.106438	0.176267	-3.428
Abce1	NP_056566	NM_015751	26.2762	599	30	0	0	0	10	30	0.168704	0	0	0	0.05855	0.116354	-0.691
Abcf1	NP_038882	NM_013854	27.1212	837	45	0	50	0	60	0	0.1811	0	0.260189	0	0.251408	0	-0.035
Abcf2	NP_001177372	NM_001190443	2.67399	627	0	0	0	5	15	30	0	0	0	0.0298148	0.0839031	0.111158	-2.275
Abcf2	NP_038881	NM_013853	17.6289	628	0	0	0	5	15	30	0	0	0	0.0297673	0.0837694	0.110981	-2.267
Abcf3	NP_038880	NM_013852	9.49798	709	0	0	20	10	0	0	0	0	0.122865	0.0527331	0	0	2.522
Abcg2	NP_036050	NM_011920	5.99875	657	0	0	0	40	0	20	0	0	0	0.227627	0	0.0707213	0.227
Abhd10	NP_766099	NM_172511	8.61431	297	0	60	50	10	50	30	0	0.854168	0.733261	0.125885	0.590429	0.234666	-0.084
Abhd12	NP_077785	NM_024465	27.1787	398	25	30	40	0	70	110	0.211586	0.318704	0.437746	0	0.616835	0.642089	-1.127
Abhd13	NP_081144	NM_026868	1.49144	337	5	0	10	0	0	0	0.0499771	0	0.129245	0	0	0	1.892
Abhd14b	NP_083907	NM_029631	45.3951	210	80	35	40	60	30	30	1.28322	0.704689	0.829633	1.06822	0.501021	0.331885	0.782
Abhd16a	NP_848707	NM_178592	15.4452	558	0	0	0	0	70	60	0	0	0	0	0.439965	0.249806	-4.151
Abhd4	NP_001192110	NM_001205181	2.06578	318	0	0	0	10	0	0	0	0	0	0.117572	0	0	1.603
Abhd4	NP_598837	NM_134076	12.2952	355	0	0	0	10	0	0	0	0	0	0.105318	0	0	1.611
Abhd6	NP_079617	NM_025341	6.96005	336	0	0	0	0	20	0	0	0	0	0	0.208759	0	-2.243
Abhd8	NP_071864	NM_022419	37.2099	439	65	0	0	0	0	0	0.498746	0	0	0	0	0	3.244
Abi1	NP_001070658	NM_001077190	12.7683	481	0	0	0	4	0	3.2	0	0	0	0.0310917	0	0.0154558	0.078
Abi1	NP_001070660	NM_001077192	5.04077	446	0	0	0	4	0	3.2	0	0	0	0.0335317	0	0.0166687	0.086
Abi1	NP_001070661	NM_001077193	0	388	0	0	0	4	0	3.2	0	0	0	0.0385441	0	0.0191604	0.067
Abi1	NP_031406	NM_007380	0.000623	475	0	0	0	4	0	3.2	0	0	0	0.0314845	0	0.015651	0.074
Abi1	NP_666106	NM_145994	4.6e-05	476	0	0	0	4	0	3.2	0	0	0	0.0314183	0	0.0156181	0.09
Abi2	NP_001185499	NM_001198570	6.12174	487	0	0	0	9.9	0	16.1	0	0	0	0.0760039	0	0.0768037	-0.775
Abi2	NP_001185500	NM_001198571	7.12129	480	0	0	0	9.9	0	16.1	0	0	0	0.0771123	0	0.0779238	-0.771
Abi2	NP_937760	NM_198127	5.30647	446	0	0	0	9.9	0	21.1	0	0	0	0.0829908	0	0.109909	-1.044
Ablim1	NP_001096647	NM_001103177	12.0071	701	0	0	0	0	50	16.5	0	0	0	0	0.250153	0.0546829	-3.366
Ablim1	NP_848803	NM_178688	2.05979	861	0	0	0	0	50	16.5	0	0	0	0	0.203667	0.0445211	-3.348
Ablim1	NP_001096648	NM_001103178	11.9599	545	0	0	0	0	0	16.5	0	0	0	0	0	0.0703352	-2.057
Abr	NP_932135	NM_198018	0.325069	871	0	0	0	6.6	0	17.4	0	0	0	0.0283306	0	0.0464105	-1.166
Abr	NP_942597	NM_198894	9.09937	813	0	0	0	6.6	0	17.4	0	0	0	0.0303517	0	0.0497215	-1.165
Abr	NP_942598	NM_198895	8.66627	859	0	0	0	6.6	0	17.4	0	0	0	0.0287264	0	0.0470589	-1.153
Acaa1a	NP_570934	NM_130864	9.62035	424	0	0	0	50	15	80	0	0	0	0.440894	0.124074	0.438338	-1.089
Acaa1b	NP_666342	NM_146230	3.18226	424	55	0	0	0	15	0	0.436946	0	0	0	0.124074	0	0.816
Acaa2	NP_803421	NM_177470	4.33763	397	0	60	30	30	50	70	0	0.639013	0.329136	0.282527	0.441706	0.409631	-0.491
Acaca	NP_579938	NM_133360	9.48014	2345	0	75	80	0	50	320	0	0.135228	0.148591	0	0.0747793	0.317024	-1.359
Acad11	NP_780533	NM_175324	6.08711	779	0	0	0	0	20	10	0	0	0	0	0.0900423	0.0298228	-2.603
Acad12	NP_848914	NM_178799	1.01545	555	0	15	0	0	0	0	0	0.114274	0	0	0	0	1.932
Acad8	NP_080138	NM_025862	7.54826	413	295	145	90	0	80	100	2.40604	1.48445	0.949156	0	0.679351	0.562517	0.584
Acad9	NP_766266	NM_172678	9.63522	625	245	165	190	120	130	200	1.32043	1.11623	1.32409	0.717846	0.729487	0.743422	0.283
Acadl	NP_031407	NM_007381	5.52074	430	0	55	30	10	80	100	0	0.540808	0.303877	0.0869483	0.652493	0.540278	-1.13
Acadm	NP_031408	NM_007382	16.8225	421	225	185	140	40	110	130	1.80024	1.85797	1.44841	0.355228	0.916357	0.717376	0.402
Acads	NP_031409	NM_007383	1.11054	412	20	15	0	0	20	10	0.163517	0.153937	0	0	0.17025	0.0563882	-0.282
Acadsb	NP_080102	NM_025826	12.2666	432	0	60	50	0	50	60	0	0.587241	0.504117	0	0.40592	0.322666	-0.482
Acadvl	NP_059062	NM_017366	28.5242	656	520	195	180	50	50	160	2.67012	1.25684	1.19513	0.284968	0.267313	0.566633	1.008
Acap2	NP_084414	NM_030138	7.52357	770	0	0	0	0	0	10	0	0	0	0	0	0.0301713	-1.539
Acat1	NP_659033	NM_144784	32.8791	424	967	380	170	170	180	250	7.6823	3.78936	1.74634	1.49904	1.48888	1.36981	0.868
Acat2	NP_033364	NM_009338	8.34996	397	0	0	10	40	10	20	0	0	0.109712	0.376703	0.0883412	0.117037	0.061
Acat3	NP_694791	NM_153151	11.4474	397	0	0	0	0	10	20	0	0	0	0	0.0883412	0.117037	-2.581
Acbd3	NP_573488	NM_133225	12.7242	525	0	0	0	0	10	70	0	0	0	0	0.0668028	0.309759	-3.596
Acbd5	NP_001095906	NM_001102436	6.2104	472	0	0	0	0	0	2.5	0	0	0	0	0	0.012305	-0.3
Acbd5	NP_001095907	NM_001102437	2.00694	509	0	0	0	0	0	2.5	0	0	0	0	0	0.0114106	-0.308
Acbd5	NP_001095908	NM_001102438	1.30691	508	0	0	0	0	0	2.5	0	0	0	0	0	0.011433	-0.325
Acbd5	NP_083069	NM_028793	8.52617	473	0	0	0	0	0	2.5	0	0	0	0	0	0.012279	-0.305
Acbd6	NP_001139253	NM_001145781	0.926206	139	0	0	0	0	0	3.3	0	0	0	0	0	0.055155	-0.543
Acbd6	NP_080959	NM_026683	0.965059	137	0	0	0	0	0	3.3	0	0	0	0	0	0.0559601	-0.555
Acbd6	NP_082526	NM_028250	8.12499	282	0	0	0	0	0	3.3	0	0	0	0	0	0.0271863	-0.55
Accn4	NP_898843	NM_183022	8.69574	539	0	0	0	0	10	20	0	0	0	0	0.0650677	0.0862038	-2.58
Ace	NP_997507	NM_207624	3.59238	1312	0	0	60	60	30	30	0	0	0.199188	0.170981	0.0801939	0.0531218	0.214
Ache	NP_033729	NM_009599	6.5747	614	0	5	0	20	0	30	0	0.0344311	0	0.121784	0	0.113511	-0.638
Acin1	NP_062513	NM_019567	3.92506	634	0	0	16	0	0	0	0	0	0.10992	0	0	0	1.982
Acin1	NP_001078941	NM_001085472	0.000443	581	0	0	16	0	0	0	0	0	0.119947	0	0	0	1.985
Acin1	NP_001229534	NM_001242605	3.6e-05	565	0	0	16	0	0	0	0	0	0.123344	0	0	0	2.006
Acin1	NP_001229535	NM_001242606	4.85768	552	0	0	14	0	0	0	0	0	0.110467	0	0	0	1.887
Acin1	NP_001078942	NM_001085473	8.60633	1326	0	22	31	0	200	230	0	0.07015	0.101827	0	0.528982	0.402967	-2.562
Acin1	NP_075679	NM_023190	18.8517	1338	0	22	31	0	200	230	0	0.0695209	0.100914	0	0.524237	0.399353	-2.557
Acly	NP_598798	NM_134037	7.69935	1091	32	97	120	100	160	370	0.0987998	0.37592	0.479073	0.342693	0.514339	0.787884	-0.918
Acly	NP_001186225	NM_001199296	36.3535	1101	32	97	120	100	160	370	0.0979024	0.372506	0.474722	0.33958	0.509667	0.780728	-0.919
Aco1	NP_031412	NM_007386	9.27185	889	200	70	140	390	90	290	0.757808	0.332924	0.685917	1.64018	0.355054	0.757847	0.246
Aco2	NP_542364	NM_080633	84.9202	780	1115	850	780	530	710	860	4.81516	4.60758	4.35557	2.54045	3.1924	2.56147	0.236
Acot1	NP_036136	NM_012006	1.25795	419	77	15	25	35	7	0	0.619024	0.151365	0.259879	0.312309	0.058592	0	2.501
Acot10	NP_073727	NM_022816	0.337077	439	0	0	0	0	20	0	0	0	0	0	0.159779	0	-2.225
Acot11	NP_079866	NM_025590	1.7678	594	0	0	0	20	0	0	0	0	0	0.125885	0	0	2.188
Acot13	NP_080066	NM_025790	25.2076	140	50	90	0	0	20	30	1.20302	2.71809	0	0	0.501021	0.497827	0.553
Acot2	NP_598949	NM_134188	1.46488	453	0	25	15	25	7	20	0	0.233341	0.144224	0.206334	0.0541943	0.102569	0.409
Acot3	NP_599007	NM_134246	0.079979	432	0	0	0	0	2	0	0	0	0	0	0.0162368	0	-0.131
Acot4	NP_599008	NM_134247	0.096421	421	0	0	0	0	2	0	0	0	0	0	0.016661	0	-0.137
Acot5	NP_663419	NM_145444	0.085019	421	0	0	0	0	10	0	0	0	0	0	0.0833052	0	-1.568
Acot6	NP_766168	NM_172580	0.818361	419	72	0	0	0	2	0	0.578828	0	0	0	0.0167406	0	2.878
Acot7	NP_001139530	NM_001146058	18.5436	350	56	13	16	19.9	0	56.5	0.538953	0.157045	0.199112	0.212576	0	0.37503	0.107
Acot7	NP_579926	NM_133348	26.8816	379	56	10	16	14.9	0	41.5	0.497714	0.11156	0.183876	0.146986	0	0.254387	0.336
Acot7	NP_001139529	NM_001146057	9.5262	384	46	10	26	14.9	60	41.5	0.403513	0.110108	0.294908	0.145072	0.547992	0.251074	-0.543
Acot9	NP_062710	NM_019736	2.85475	439	0	0	0	0	20	20	0	0	0	0	0.159779	0.10584	-2.885
Acox1	NP_056544	NM_015729	30.4044	661	0	0	0	0	90	60	0	0	0	0	0.477524	0.21088	-4.219
Acp1	NP_001103709	NM_001110239	8.78238	158	35	0	0	15	0	0	0.746177	0	0	0.354947	0	0	2.985
Acp2	NP_031413	NM_007387	9.34605	423	0	25	40	0	40	20	0	0.24989	0.411874	0	0.331645	0.109844	-0.394
Acp6	NP_062774	NM_019800	3.14939	418	0	5	0	0	0	10	0	0.0505758	0	0	0	0.0555788	-0.833
Acsf2	NP_722502	NM_153807	1.39531	615	0	20	0	0	0	30	0	0.1375	0	0	0	0.113327	-0.796
Acsf3	NP_659181	NM_144932	4.38702	583	0	0	20	0	10	0	0	0	0.149419	0	0.0601569	0	0.266
Acsl1	NP_032007	NM_007981	28.6754	699	290	140	150	100	190	250	1.3975	0.846836	0.934672	0.534875	0.953302	0.830899	-0.063
Acsl3	NP_001028778	NM_001033606	50.8644	720	55	35	100	15	150	449.9	0.257313	0.205534	0.60494	0.0778912	0.730656	1.45167	-1.577
Acsl3	NP_001129694	NM_001136222	0	568	0	0	0	15	0	0	0	0	0	0.0987354	0	0	1.933
Acsl4	NP_001028772	NM_001033600	0.007169	670	0	0	0	0	0	14.9	0	0	0	0	0	0.051665	-1.957
Acsl4	NP_997508	NM_207625	7.23693	711	0	0	0	0	0	14.9	0	0	0	0	0	0.0486858	-1.945
Acsl6	NP_001028770	NM_001033598	14.6336	697	28	10	35	30	57	95	0.135318	0.0606619	0.218716	0.160923	0.286811	0.316648	-0.89
Acsl6	NP_001028771	NM_001033599	0.328034	697	28	10	35	30	57	95	0.135318	0.0606619	0.218716	0.160923	0.286811	0.316648	-0.888
Acsl6	NP_659072	NM_144823	26.0666	722	28	10	35	30	60	97.5	0.130633	0.0585614	0.211143	0.155351	0.291453	0.313728	-0.929
Acsl6	NP_001028769	NM_001033597	1.59439	722	28	10	35	30	60	97.5	0.130633	0.0585614	0.211143	0.155351	0.291453	0.313728	-0.927
Acss2	NP_062785	NM_019811	7.83021	701	0	0	0	0	0	30	0	0	0	0	0	0.0994234	-2.64
Acta1	NP_033736	NM_009606	4.75253	377	551	498	0	0	0	0	4.92313	5.58517	0	0	0	0	6.004
Acta2	NP_031418	NM_007392	8.63725	377	164	0	0	0	0	547	1.46532	0	0	0	0	3.37079	-1.686
Actb	NP_031419	NM_007393	381.797	375	1121	723	695	1083.7	1094	939.2	10.0694	8.15184	8.07233	10.8046	10.2315	5.81852	0.078
Actbl2	NP_780706	NM_175497	0.033721	376	513	351	462	589.7	479	440.9	4.59579	3.94701	5.35179	5.86372	4.46788	2.72419	0.235
Actc1	NP_033738	NM_009608	3.99668	377	511	485	505	849	764	632.8	4.56573	5.43938	5.83439	8.41969	7.10732	3.89951	0.02
Actg1	NP_033739	NM_009609	342.637	375	0	1206	645	1083.7	996.1	939.2	0	13.5977	7.49158	10.8046	9.31592	5.81852	-0.084
Actg2	NP_033740	NM_009610	0.085366	376	164	0	0	0	0	0	1.46922	0	0	0	0	0	4.172
Actl6a	NP_062647	NM_019673	12.1518	429	45	0	0	0	55	75	0.353334	0	0	0	0.449634	0.406153	-1.501
Actl6b	NP_113581	NM_031404	16.4643	426	0	0	0	0	25	45	0	0	0	0	0.205819	0.245408	-3.442
Actn1	NP_598917	NM_134156	6.66849	892	132	117	130	143.3	167	258.3	0.498471	0.554587	0.634781	0.600636	0.656607	0.672736	-0.293
Actn2	NP_150371	NM_033268	1.06942	894	0	0	0	18.3	0	28.3	0	0	0	0.0765321	0	0.0735418	-0.826
Actn3	NP_038484	NM_013456	0.181513	900	0	47	0	0	0	0	0	0.220803	0	0	0	0	2.954
Actn4	NP_068695	NM_021895	28.0965	912	147	257	250	538.3	397	713.3	0.542942	1.19148	1.19396	2.20678	1.52669	1.81703	-0.43
Actr10	NP_062759	NM_019785	18.174	417	0	0	0	0	20	30	0	0	0	0	0.168209	0.167136	-3.125
Actr1a	NP_058556	NM_016860	44.6556	376	25	15	60	70	65	185	0.223966	0.168676	0.695038	0.696049	0.606289	1.14306	-0.887
Actr1b	NP_666219	NM_146107	19.8414	376	0	30	40	0	45	135	0	0.337351	0.463359	0	0.419738	0.834125	-1.421
Actr2	NP_666355	NM_146243	27.6091	394	40	35	0	130	130	160	0.341975	0.375596	0	1.23361	1.15718	0.943429	-0.846
Actr3	NP_001192314	NM_001205385	11.8543	418	80	0	50	160	130	130	0.64468	0	0.521001	1.43111	1.09074	0.722524	-0.388
Actr6	NP_080190	NM_025914	7.98377	396	0	0	0	0	0	10	0	0	0	0	0	0.0586665	-1.556
Acy1	NP_079647	NM_025371	3.61049	408	0	0	0	30	0	10	0	0	0	0.27491	0	0.056941	0.634
Acyp1	NP_079697	NM_025421	13.606	99	30	70	30	70	20	30	1.02074	2.98959	1.31987	2.64358	0.708515	0.703998	0.894
Acyp2	NP_083620	NM_029344	13.6912	106	0	0	30	0	0	0	0	0	1.23271	0	0	0	2.55
Adam10	NP_031425	NM_007399	14.4688	749	120	20	50	120	50	30	0.539672	0.112901	0.290759	0.599003	0.234122	0.0930518	0.862
Adam17	NP_033745	NM_009615	4.47415	827	0	0	0	10	0	0	0	0	0	0.0452089	0	0	1.587
Adam22	NP_001007221	NM_001007220	1.61932	857	0	0	0	0	0	3.3	0	0	0	0	0	0.00894579	-0.539
Adam22	NP_001007222	NM_001007221	2e-05	821	0	0	0	0	0	3.3	0	0	0	0	0	0.00933805	-0.552
Adam22	NP_001091695	NM_001098225	9.36831	868	0	0	0	0	0	3.3	0	0	0	0	0	0.00883242	-0.536
Adam9	NP_031430	NM_007404	24.568	845	0	30	0	0	0	0	0	0.150111	0	0	0	0	2.563
Adamts14	NP_001074596	NM_001081127	0.079386	1206	30	0	0	0	0	0	0.0837924	0	0	0	0	0	2.531
Adamts15	NP_001019310	NM_001024139	0.284939	950	65	0	0	0	0	0	0.230473	0	0	0	0	0	3.262
Adarb1	NP_570965	NM_130895	2.85848	701	0	0	0	0	10	0	0	0	0	0	0.0500306	0	-1.553
Adarb1	NP_001020008	NM_001024837	3.11878	711	0	0	0	0	10	0	0	0	0	0	0.049327	0	-1.558
Adck3	NP_075830	NM_023341	2.66388	645	0	20	0	0	0	0	0	0.131105	0	0	0	0	2.162
Adcy2	NP_705762	NM_153534	14.6267	1095	0	0	10	0	30	60	0	0	0.0397769	0	0.0960862	0.127298	-2.468
Adcy5	NP_001012783	NM_001012765	6.27803	1262	0	0	0	0	0	20	0	0	0	0	0	0.0368176	-2.203
Adcy6	NP_031431	NM_007405	17.8923	1168	0	0	0	50	0	0	0	0	0	0.16005	0	0	3.042
Adcy8	NP_033753	NM_009623	2.68104	1249	0	0	0	0	0	30	0	0	0	0	0	0.0558013	-2.613
Add1	NP_038485	NM_013457	55.5526	632	0	11	13	44.6	78	0	0	0.0735909	0.0895925	0.263844	0.432844	0	-0.628
Add1	NP_001019629	NM_001024458	6.50629	735	0	11	13	44.6	78	365	0	0.0632782	0.0770373	0.22687	0.372187	1.15369	-2.356
Add1	NP_001095914	NM_001102444	10.6161	663	0	11	13	44.6	78	0	0	0.07015	0.0854034	0.251508	0.412606	0	-0.628
Add2	NP_038486	NM_013458	7.72287	725	0	0	0	35	62	195	0	0	0	0.180493	0.299922	0.624859	-2.417
Add3	NP_001157572	NM_001164100	7.85006	674	0	0	0	0	80	105	0	0	0	0	0.416279	0.361922	-4.471
Add3	NP_001157571	NM_001164099	3.55055	706	0	0	0	0	80	105	0	0	0	0	0.39741	0.345517	-4.396
Adh1	NP_031435	NM_007409	0.25179	375	0	0	0	10	0	0	0	0	0	0.0997008	0	0	1.596
Adh5	NP_031436	NM_007410	22.3623	374	0	55	20	150	40	90	0	0.621784	0.232918	1.49951	0.375096	0.559057	0.053
Adh7	NP_033756	NM_009626	0.010861	374	0	0	0	20	0	0	0	0	0	0.199935	0	0	2.182
Adipor1	NP_082596	NM_028320	82.2525	375	20	0	0	10	0	0	0.179651	0	0	0.0997008	0	0	2.507
Adk	NP_598840	NM_134079	2.08636	361	0	0	0	0	0	30	0	0	0	0	0	0.193063	-2.615
Adnp	NP_033758	NM_009628	44.0813	1108	0	0	0	0	220	180	0	0	0	0	0.696365	0.377414	-5.283
Adpgk	NP_082397	NM_028121	3.03763	496	0	0	0	0	10	0	0	0	0	0	0.0707086	0	-1.543
Adprh	NP_031440	NM_007414	19.0125	362	0	0	0	50	0	80	0	0	0	0.516406	0	0.513413	-0.93
Adrbk1	NP_570933	NM_130863	8.94437	647	0	0	0	0	10	30	0	0	0	0	0.0542063	0.107721	-2.879
Adrbk2	NP_796052	NM_177078	2.35497	688	0	0	0	10	0	0	0	0	0	0.0543427	0	0	1.593
Adsl	NP_033764	NM_009634	12.363	484	5	35	0	50	30	130	0.0347981	0.305753	0	0.386237	0.217385	0.623998	-1.065
Adss	NP_031448	NM_007422	10.0852	456	0	0	0	0	0	20	0	0	0	0	0	0.101894	-2.213
Afap1	NP_081649	NM_027373	6.66226	731	0	0	0	10	0	0	0	0	0	0.0511461	0	0	1.578
Afg3l1	NP_473411	NM_054070	7.31654	789	0	0	0	0	0	20	0	0	0	0	0	0.0588896	-2.213
Afg3l2	NP_081406	NM_027130	9.60497	802	90	70	60	20	120	130	0.378006	0.369039	0.325853	0.0932364	0.52476	0.376577	-0.541
Aga	NP_001191983	NM_001205054	5.5e-05	336	0	10	0	0	10	0	0	0.125837	0	0	0.104379	0	-0.326
Aga	NP_001005847	NM_001005847	2.60193	346	0	10	0	20	20	0	0	0.1222	0	0.216114	0.202725	0	-0.071
Agap1	NP_001032213	NM_001037136	3.42735	804	0	1	0	15	48	23.3	0	0.00525887	0	0.0697533	0.209382	0.0673264	-1.889
Agap1	NP_835220	NM_178119	18.924	857	0	1	0	15	48	23.3	0	0.00493364	0	0.0654395	0.196433	0.0631627	-1.891
Agap3	NP_001243360	NM_001256431	6.49276	395	0	1	0	0	0	0	0	0.0107041	0	0	0	0	0.335
Agap3	NP_631892	NM_139153	14.8437	910	0	0	30	0	63	33.3	0	0	0.14359	0	0.242803	0.0850136	-1.573
Agbl5	NP_001041657	NM_001048192	5.98863	846	5	0	0	0	0	0	0.0199081	0	0	0	0	0	1.106
Agk	NP_076027	NM_023538	5.5782	421	35	0	10	0	50	0	0.280038	0	0.103458	0	0.416526	0	-0.577
Agl	NP_001074795	NM_001081326	4.58242	1532	0	0	0	30	0	70	0	0	0	0.0732137	0	0.106151	-1.272
Agpat3	NP_443747	NM_053014	120.269	376	25	45	20	0	30	230	0.223966	0.506027	0.231679	0	0.279826	1.4211	-1.552
Agpat5	NP_081068	NM_026792	17.6488	365	0	0	0	0	20	0	0	0	0	0	0.192172	0	-2.209
Agrn	NP_067617	NM_021604	14.9835	2034	0	0	0	0	70	80	0	0	0	0	0.120698	0.0913744	-4.223
Ahctf1	NP_080651	NM_026375	7.70523	2243	0	0	0	0	100	0	0	0	0	0	0.15636	0	-3.781
Ahcy	NP_057870	NM_016661	8.72787	432	100	70	0	110	40	160	0.779735	0.685114	0	0.952004	0.324736	0.860442	-0.158
Ahcyl1	NP_663517	NM_145542	65.912	530	21	32	0	143.1	57	169.9	0.133467	0.255284	0	1.00947	0.377184	0.744737	-0.639
Ahcyl2	NP_001164471	NM_001171000	2.72024	612	29	15	20	83.1	19	69.9	0.159616	0.103631	0.142339	0.507668	0.108882	0.265345	0.003
Ahcyl2	NP_067389	NM_021414	0.668133	613	29	15	20	83.1	19	69.9	0.159356	0.103462	0.142107	0.506839	0.108704	0.264912	0.005
Ahcyl2	NP_001164472	NM_001171001	4.88286	508	29	15	0	0	14	0	0.192294	0.124846	0	0	0.0966537	0	0.641
Ahdc1	NP_666267	NM_146155	5.53636	1594	0	0	0	0	60	20	0	0	0	0	0.132013	0.0291492	-3.574
Ahi1	NP_080479	NM_026203	29.7728	1047	10	45	60	10	0	0	0.0321724	0.181725	0.249603	0.0357094	0	0	3.877
Ahnak	NP_033773	NM_009643	0.971264	5656	0	0	0	0	0	180	0	0	0	0	0	0.0739347	-4.464
AI314180	NP_759013	NM_172381	16.9702	1840	0	0	0	0	0	180	0	0	0	0	0	0.227269	-4.372
AI462493	NP_001153828	NM_001160356	30.4245	89	0	20	0	0	0	0	0	0.950142	0	0	0	0	2.163
AI480653	NP_941028	NM_198626	4.58591	392	0	0	0	0	10	0	0	0	0	0	0.0894681	0	-1.547
AI837181	NP_598910	NM_134149	7.46809	298	0	0	0	10	0	10	0	0	0	0.125462	0	0.0779595	-0.31
Aifm1	NP_036149	NM_012019	8.78399	612	240	195	200	60	130	150	1.32096	1.3472	1.42339	0.366547	0.744982	0.56941	0.412
Aimp1	NP_031952	NM_007926	17.4855	319	60	10	0	40	40	0	0.633565	0.132543	0	0.468812	0.439768	0	0.503
Aip	NP_057875	NM_016666	23.0618	330	25	15	0	0	10	10	0.255186	0.192188	0	0	0.106277	0.0703998	0.258
Aipl1	NP_444475	NM_053245	196.296	328	65	45	20	60	10	0	0.667529	0.580079	0.265584	0.683923	0.106925	0	2.391
Ak1	NP_001185719	NM_001198790	0.096852	194	17	12	45	30	15	35	0.295174	0.261534	1.01031	0.578162	0.271171	0.419133	0.24
Ak1	NP_067490	NM_021515	1.49459	210	12	12	45	30	15	35	0.192483	0.241608	0.933337	0.534111	0.250511	0.387199	0.186
Ak2	NP_001029138	NM_001033966	3.13511	239	95	65	35	10	35	35	1.33893	1.14991	0.637845	0.156434	0.513599	0.340217	0.578
Ak2	NP_058591	NM_016895	5.69179	232	95	65	35	10	35	35	1.37932	1.18461	0.657091	0.161154	0.529096	0.350482	0.584
Ak3	NP_067274	NM_021299	18.76	227	170	220	110	20	160	110	2.52263	4.09775	2.11063	0.329408	2.472	1.12578	0.157
Ak4	NP_001171076	NM_001177605	0.001843	223	35	45	50	10	30	20	0.528681	0.853211	0.976586	0.167658	0.471814	0.208358	0.536
Akap12	NP_112462	NM_031185	6.74235	1684	0	60	0	10	0	40	0	0.150646	0	0.0222018	0	0.0551827	0.071
Akap2	NP_001030609	NM_001035532	1.17514	880	0	0	0	0	0	6.6	0	0	0	0	0	0.017424	-1.15
Akap2	NP_001030610	NM_001035533	1.45671	893	0	0	0	10	0	6.6	0	0	0	0.0418676	0	0.0171703	0.081
Akap2	NP_033779	NM_009649	1.00899	795	0	0	0	0	0	6.6	0	0	0	0	0	0.0192869	-1.17
Akap5	NP_001094941	NM_001101471	29.1654	745	0	0	0	0	10	10	0	0	0	0	0.0470758	0.0311838	-2.157
Akap7	NP_061217	NM_018747	11.5839	314	0	0	20	0	0	0	0	0	0.277425	0	0	0	2.152
Akap8	NP_062748	NM_019774	24.5719	687	0	0	0	0	20	20	0	0	0	0	0.1021	0.067633	-2.867
Akap8l	NP_059504	NM_017476	22.4186	641	0	0	0	0	50	30	0	0	0	0	0.273568	0.10873	-3.561
Akap9	NP_919444	NM_194462	16.4998	3779	75	0	100	10	0	0	0.0668521	0	0.115257	0.00989357	0	0	4.262
Akd1	XP_003085720	XM_003085672	notfound	1879	50	0	0	0	0	0	0.0896342	0	0	0	0	0	3.033
Akna	NP_001038979	NM_001045514	4.94327	1404	20	0	0	0	0	0	0.0479837	0	0	0	0	0	2.192
Akr1a1	NP_067448	NM_021473	84.8967	325	165	175	100	210	120	120	1.71014	2.27669	1.34018	2.41583	1.29495	0.857794	0.499
Akr1b10	NP_765986	NM_172398	1.67277	316	0	0	0	10	0	5	0	0	0	0.118316	0	0.0367594	0.334
Akr1b3	NP_033788	NM_009658	3.16368	316	0	75	70	180	90	70	0	1.00351	0.964842	2.12968	0.998871	0.514631	0.214
Akr1b8	NP_032038	NM_008012	0.620241	316	0	0	0	10	0	5	0	0	0	0.118316	0	0.0367594	0.328
Akr1c21	NP_084177	NM_029901	0.180864	323	0	10	0	0	0	0	0	0.130902	0	0	0	0	1.6
Akr1e1	NP_061347	NM_018859	19.995	301	0	35	0	50	30	60	0	0.491643	0	0.62106	0.34955	0.463095	-0.536
Akr7a5	NP_079613	NM_025337	4.75012	367	110	85	40	70	0	40	1.00962	0.979268	0.474722	0.713119	0	0.253209	1.517
Akt1	NP_001159366	NM_001165894	0.176762	488	0	0	0	0	0	15	0	0	0	0	0	0.0714096	-1.951
Akt1	NP_033782	NM_009652	24.6722	480	0	0	0	0	0	15	0	0	0	0	0	0.0725998	-1.936
Alad	NP_032551	NM_008525	5.88579	330	125	25	40	60	20	30	1.27593	0.320313	0.527948	0.679778	0.212554	0.211199	1.118
Alb	NP_033784	NM_009654	0.027482	608	520	275	370	320	170	310	2.88092	1.9124	2.65059	1.96778	0.980617	1.18452	0.629
Alcam	NP_033785	NM_009655	4.96689	583	0	0	0	0	20	60	0	0	0	0	0.120314	0.239094	-3.54
Aldh16a1	NP_666066	NM_145954	1.83735	802	0	0	0	0	0	20	0	0	0	0	0	0.057935	-2.221
Aldh18a1	NP_062672	NM_019698	3.05633	795	32	15	0	0	0	20	0.135586	0.0797761	0	0	0	0.0584451	0.366
Aldh18a1	NP_705782	NM_153554	4.14469	793	32	15	0	0	0	20	0.135928	0.0799773	0	0	0	0.0585925	0.366
Aldh1a1	NP_038495	NM_013467	11.6983	501	127	60	0	150	155	266.6	0.85388	0.506363	0	1.11939	1.08505	1.23625	-0.718
Aldh1a7	NP_036051	NM_011921	3.28233	501	0	0	0	0	0	76.6	0	0	0	0	0	0.355203	-3.563
Aldh1l1	NP_081682	NM_027406	2.0307	902	15	0	0	40	40	100	0.0560164	0	0	0.1658	0.155528	0.25756	-1.397
Aldh1l2	NP_705771	NM_153543	1.32008	923	50	10	0	0	0	0	0.182473	0.0458086	0	0	0	0	3.193
Aldh2	NP_033786	NM_009656	8.13305	519	87	75	90	100	265	236.6	0.564654	0.611002	0.755301	0.720381	1.79074	1.05909	-0.856
Aldh3a2	NP_031463	NM_007437	9.00694	484	35	25	30	0	60	60	0.243587	0.218395	0.269973	0	0.43477	0.287999	-0.777
Aldh4a1	NP_780647	NM_175438	3.1367	562	80	0	0	0	0	80	0.479495	0	0	0	0	0.330704	-0.476
Aldh5a1	NP_766120	NM_172532	6.02998	523	0	135	180	40	120	100	0	1.09139	1.49905	0.285949	0.804699	0.444205	-0.016
Aldh6a1	NP_598803	NM_134042	7.59837	535	225	90	60	30	130	70	1.41664	0.711275	0.488475	0.209651	0.852204	0.303969	0.207
Aldh7a1	NP_001120810	NM_001127338	4.0913	511	0	0	0	60	45	60	0	0	0	0.438996	0.308849	0.272782	-1.012
Aldh7a1	NP_613066	NM_138600	5.18401	539	0	0	0	0	45	60	0	0	0	0	0.292805	0.258612	-3.857
Aldh9a1	NP_064377	NM_019993	7.04479	518	0	35	10	90	40	80	0	0.285685	0.0840844	0.649595	0.270822	0.358794	-0.374
Aldoa	NP_001170778	NM_001177307	26.8957	418	353	0	337	0	269	0	2.84465	0	3.51155	0	2.25699	0	0.446
Aldoa	NP_031464	NM_007438	403.285	364	353	720	317	1835	269	1230	3.26666	8.36334	3.79318	18.848	2.59182	7.85035	0.265
Aldoc	NP_033787	NM_009657	81.9818	363	266	235	159	390	189	385	2.46834	2.73722	1.90781	4.01687	1.82604	2.46399	0.105
Alg11	NP_898965	NM_183142	2.02856	450	0	0	0	0	10	0	0	0	0	0	0.0779366	0	-1.531
Alg11	NP_001230090	NM_001243161	4.77862	492	0	0	0	0	10	20	0	0	0	0	0.0712835	0.0944388	-2.582
Alg2	NP_064382	NM_019998	31.9867	415	15	0	0	0	80	110	0.121751	0	0	0	0.676077	0.615786	-2.87
Alg3	NP_666051	NM_145939	7.19269	438	0	0	0	0	10	0	0	0	0	0	0.0800719	0	-1.543
Alkbh5	NP_766531	NM_172943	9.46864	395	0	0	0	0	20	0	0	0	0	0	0.177577	0	-2.235
Alms1	NP_660258	NM_145223	5.07517	3251	70	0	0	0	0	0	0.072529	0	0	0	0	0	3.353
Aloxe3	NP_035916	NM_011786	0.39852	711	0	15	0	0	0	0	0	0.0892011	0	0	0	0	1.932
Alpl	NP_031457	NM_007431	36.751	524	0	0	30	30	0	0	0	0	0.249365	0.214052	0	0	3.179
Als2	NP_082993	NM_028717	10.5378	1651	0	0	0	0	0	40	0	0	0	0	0	0.0562857	-2.913
Alyref	NP_035698	NM_011568	17.7966	255	0	0	30	10	130	130	0	0	0.51242	0.146619	1.78796	1.18437	-2.329
Amacr	NP_032563	NM_008537	2.30497	381	0	40	0	0	0	0	0	0.443898	0	0	0	0	2.809
Amdhd2	NP_766523	NM_172935	3.62794	409	0	0	0	0	0	20	0	0	0	0	0	0.113604	-2.185
Amfr	NP_035917	NM_011787	24.7717	639	0	0	0	0	10	20	0	0	0	0	0.0548849	0.0727134	-2.563
Ampd2	NP_083055	NM_028779	9.80626	798	0	0	20	0	0	110	0	0	0.109162	0	0	0.32024	-2.081
Amph	NP_778172	NM_175007	63.3793	686	92	104	85	120	133	285	0.451746	0.641	0.539685	0.654014	0.679957	0.965175	-0.54
Amy2b	NP_001177332	NM_001190403	0.238992	453	0	0	0	20	0	0	0	0	0	0.165068	0	0	2.172
Anapc2	NP_780509	NM_175300	12.8278	837	50	0	0	0	0	0	0.201222	0	0	0	0	0	2.987
Anapc4	NP_077175	NM_024213	19.703	807	0	0	0	0	0	10	0	0	0	0	0	0.028788	-1.554
Anapc5	NP_001035956	NM_001042491	10.8136	727	0	0	0	0	0	10	0	0	0	0	0	0.0319559	-1.547
Anapc5	NP_067480	NM_021505	14.9451	740	0	0	0	0	0	10	0	0	0	0	0	0.0313945	-1.544
Ank	NP_065065	NM_020332	15.3032	492	0	0	0	10	0	0	0	0	0	0.0759914	0	0	1.621
Ank1	NP_001104253	NM_001110783	3.17061	1907	0	44	55	40	50	51.2	0	0.0975552	0.12562	0.0784222	0.0919546	0.0623741	-0.17
Ank1	NP_112435	NM_031158	0.386137	1848	0	54	45	40	50	51.2	0	0.123549	0.106061	0.080926	0.0948904	0.0643655	-0.172
Ank2	NP_848770	NM_178655	28.4059	1050	0	65	50	40	221	365	0	0.261742	0.207408	0.14243	0.738171	0.807586	-1.82
Ank2	NP_001029340	NM_001034168	29.9709	933	0	0	0	0	50	95	0	0	0	0	0.18795	0.236552	-4.143
Ank3	NP_033800	NM_009670	0.530636	898	9	2	3	0	0	0	0.0337596	0.00941678	0.0145509	0	0	0	1.754
Ank3	NP_733926	NM_170730	0	838	0	2	3	0	0	0	0	0.010091	0.0155927	0	0	0	0.95
Ank3	NP_733788	NM_170687	0.033195	1094	9	2	3	0	0	0	0.0277112	0.00772968	0.011944	0	0	0	1.736
Ank3	NP_733789	NM_170688	0.244117	1765	15	12	4	11.2	34	63.7	0.0286271	0.0287465	0.00987098	0.0237248	0.0675598	0.0838456	-1.332
Ank3	NP_733924	NM_170728	18.6241	1726	15	12	4	11.2	34	63.7	0.0292739	0.0293961	0.010094	0.0242609	0.0690863	0.0857401	-1.342
Ank3	NP_733925	NM_170729	1.62301	1922	15	12	4	11.2	39	63.7	0.0262887	0.0263983	0.00906466	0.0217868	0.0711648	0.0769966	-1.396
Ank3	NP_666117	NM_146005	0.017359	1961	15	12	4	11.2	39	63.7	0.0257658	0.0258733	0.00888439	0.0213536	0.0697495	0.0754653	-1.397
Ank3	NP_733791	NM_170690	0.094251	1940	15	12	4	11.2	39	63.7	0.0260448	0.0261534	0.00898056	0.0215847	0.0705045	0.0762822	-1.397
Ank3	NP_733790	NM_170689	2.09149	1943	15	12	4	11.2	39	63.7	0.0260045	0.026113	0.00896669	0.0215514	0.0703957	0.0761644	-1.398
Ankfy1	NP_033801	NM_009671	9.239	1169	0	0	0	10	0	0	0	0	0	0.0319827	0	0	1.598
Ankhd1	NP_780584	NM_175375	21.0151	2548	35	0	0	0	0	0	0.04627	0	0	0	0	0	2.674
Ankrd13a	NP_080994	NM_026718	10.9901	588	95	25	0	40	0	0	0.544223	0.179768	0	0.254339	0	0	4.11
Ankrd17	NP_932127	NM_198010	10.511	2352	0	12	15	25	0	0	0	0.0215721	0.0277779	0.0397404	0	0	3.032
Ankrd17	NP_112148	NM_030886	12.9254	2603	0	77	15	25	0	0	0	0.125073	0.0250993	0.0359084	0	0	3.804
Ankrd33b	NP_001157913	NM_001164441	39.0895	486	395	70	140	80	0	0	2.73774	0.60899	1.25469	0.615437	0	0	5.59
Ankrd33b	NP_081772	NM_027496	2.35792	477	395	60	0	80	0	0	2.78939	0.531841	0	0.627049	0	0	5.344
Ankrd40	NP_082075	NM_027799	21.2663	363	0	0	0	0	0	5	0	0	0	0	0	0.0319999	-0.904
Ankrd40	NP_666136	NM_146024	2.9781	324	0	0	0	0	0	5	0	0	0	0	0	0.0358517	-0.894
Anks1	NP_852078	NM_181413	6.22405	1150	0	0	0	0	0	20	0	0	0	0	0	0.0404034	-2.242
Ano2	NP_705817	NM_153589	28.7142	1002	0	0	0	0	0	50	0	0	0	0	0	0.115928	-3.094
Ano6	NP_780553	NM_175344	2.18707	911	20	0	0	35	0	0	0.0739507	0	0	0.143641	0	0	3.086
Ano6	NP_001240742	NM_001253813	1.62142	932	0	0	0	35	0	0	0	0	0	0.140405	0	0	2.663
Ano8	NP_001158151	NM_001164679	6.0526	1060	0	0	0	0	10	20	0	0	0	0	0.0330863	0.0438338	-2.576
Anp32a	NP_033802	NM_009672	113.885	247	35	50	40	30	155	410	0.477311	0.855897	0.705356	0.454103	2.20084	3.85631	-1.795
Anp32b	NP_570959	NM_130889	33.3792	272	20	0	0	0	55	150	0.247681	0	0	0	0.709166	1.28117	-2.703
Anp32e	NP_001240686	NM_001253757	9.59905	248	25	15	0	0	15	35	0.339562	0.255734	0	0	0.212126	0.32787	-0.678
Anp32e	NP_075699	NM_023210	99.7955	260	25	15	0	0	15	35	0.32389	0.243931	0	0	0.202335	0.312738	-0.673
Anpep	NP_032512	NM_008486	0.389058	966	0	0	0	60	0	0	0	0	0	0.232222	0	0	3.181
Anxa1	NP_034860	NM_010730	4.2366	346	95	0	0	80	40	60	0.924865	0	0	0.864458	0.405451	0.402866	0.072
Anxa11	NP_038497	NM_013469	0.803356	503	0	0	0	70	0	30	0	0	0	0.520307	0	0.13856	0.367
Anxa2	NP_031611	NM_007585	5.64083	339	305	25	0	140	70	90	3.03062	0.311809	0	1.54404	0.72419	0.616777	0.583
Anxa3	NP_038498	NM_013470	1.97557	323	0	0	0	0	20	20	0	0	0	0	0.217161	0.143851	-2.871
Anxa4	NP_038499	NM_013471	1.40378	319	0	30	10	20	0	0	0	0.39763	0.136538	0.234406	0	0	3.177
Anxa5	NP_033803	NM_009673	11.3706	319	170	60	80	210	40	150	1.7951	0.79526	1.09231	2.46127	0.439768	1.09241	0.511
Anxa6	NP_001103681	NM_001110211	5.19548	667	175	85	65	225	65	85	0.883778	0.538818	0.424456	1.26121	0.341776	0.296059	0.802
Anxa6	NP_038500	NM_013472	6.80047	673	175	85	65	225	65	85	0.875898	0.534014	0.420672	1.24996	0.338729	0.29342	0.805
Anxa7	NP_033804	NM_009674	0.70673	463	0	20	0	130	0	10	0	0.182641	0	1.04977	0	0.050177	2.162
Aoc3	NP_033805	NM_009675	0.434943	765	0	0	0	0	10	0	0	0	0	0	0.0458451	0	-1.535
Ap1b1	NP_001229972	NM_001243043	4.65918	953	58	61	53	0	0	136	0.205006	0.270636	0.24223	0	0	0.331537	-0.269
Ap1b1	NP_001229973	NM_001243044	7.40271	946	58	61	53	0	0	136	0.206523	0.272639	0.244023	0	0	0.33399	-0.26
Ap1b1	NP_031480	NM_007454	24.0998	943	58	61	58	229.4	203	161	0.20718	0.273506	0.267893	0.909518	0.754985	0.396643	-0.388
Ap1g1	NP_033807	NM_009677	17.5086	825	0	40	60	70	70	120	0	0.205	0.316769	0.31723	0.297576	0.337919	-0.604
Ap1m1	NP_031482	NM_007456	24.9352	423	0	0	0	10	50	90	0	0	0	0.0883872	0.414556	0.494296	-2.887
Ap2a1	NP_031484	NM_007458	5.65822	977	0	118	93	184.8	176	296.4	0	0.510665	0.414604	0.707192	0.631789	0.704805	-0.677
Ap2a1	NP_001070732	NM_001077264	15.5191	955	0	118	93	184.8	176	296.4	0	0.522429	0.424155	0.723483	0.646343	0.721041	-0.675
Ap2a2	NP_031485	NM_007459	61.2823	938	335	256	253	319.8	446	546.4	1.20302	1.15395	1.1748	1.27469	1.66758	1.3533	-0.339
Ap2b1	NP_001030931	NM_001035854	20.1661	951	74	107	117	229.4	198	303	0.262109	0.475721	0.535859	0.901867	0.730195	0.740197	-0.45
Ap2b1	NP_082191	NM_027915	10.2394	937	74	107	117	229.4	198	303	0.266025	0.482828	0.543865	0.915342	0.741105	0.751257	-0.448
Ap2m1	NP_033809	NM_009679	219.098	435	70	120	120	220	170	220	0.54205	1.16638	1.20154	1.89088	1.37061	1.17495	-0.194
Ap2s1	NP_941015	NM_198613	56.226	142	20	55	30	20	20	0	0.47443	1.63766	0.920191	0.526589	0.493964	0	1.304
Ap3b1	NP_033810	NM_009680	9.16773	1105	0	0	0	0	55	75	0	0	0	0	0.174564	0.157683	-4.085
Ap3b2	NP_067467	NM_021492	25.9031	1082	0	50	110	80	235	465	0	0.195385	0.442803	0.276435	0.761719	0.998415	-1.569
Ap3d1	NP_031486	NM_007460	30.9688	1199	0	0	0	50	120	320	0	0	0	0.155912	0.351007	0.620035	-2.617
Ap3m1	NP_061299	NM_018829	8.19723	418	0	0	0	0	30	0	0	0	0	0	0.251709	0	-2.61
Ap3m2	NP_083781	NM_029505	15.4913	418	0	0	0	20	0	130	0	0	0	0.178889	0	0.722524	-2.241
Ap3s1	NP_033811	NM_009681	25.7663	193	0	0	30	20	30	20	0	0	0.677032	0.387438	0.545152	0.240745	-0.459
Ap3s2	NP_033812	NM_009682	14.3772	193	0	5	0	0	0	0	0	0.109537	0	0	0	0	1.103
Apba1	NP_796008	NM_177034	16.7712	842	0	0	0	0	0	20	0	0	0	0	0	0.0551827	-2.254
Apc	NP_031488	NM_007462	47.9662	2842	0	25	0	0	0	0	0	0.0371933	0	0	0	0	2.378
Apc2	NP_035919	NM_011789	7.4203	2274	40	0	0	0	0	0	0.0592516	0	0	0	0	0	2.793
Apeh	NP_666338	NM_146226	12.6078	732	0	60	50	70	30	90	0	0.346568	0.297512	0.357534	0.143736	0.285639	-0.087
Apex1	NP_033817	NM_009687	4.16275	317	0	0	0	0	60	50	0	0	0	0	0.663813	0.366434	-3.915
Api5	NP_031492	NM_007466	25.5648	504	0	0	0	0	200	440	0	0	0	0	1.39173	2.02818	-5.729
Aplp2	NP_001095925	NM_001102455	86.2708	751	7	0	26	0	0	7.8	0.0313971	0	0.150792	0	0	0.024129	0.919
Aplp2	NP_033821	NM_009691	5.7e-05	695	0	0	6	0	0	7.8	0	0	0.0376021	0	0	0.0260732	-0.466
Aplp2	NP_001095926	NM_001102456	86.9982	707	2	0	6	0	0	7.8	0.00952887	0	0.0369638	0	0	0.0256307	-0.35
Apmap	NP_082253	NM_027977	8.53975	415	0	15	0	0	70	60	0	0.152824	0	0	0.591567	0.335883	-2.481
Apoa1	NP_033822	NM_009692	0.14751	264	0	20	0	30	20	30	0	0.320313	0	0.424861	0.265693	0.263999	-0.458
Apoa1bp	NP_659146	NM_144897	28.0483	282	0	55	50	0	40	20	0	0.824636	0.772264	0	0.497468	0.164765	0.082
Apoa4	NP_031494	NM_007468	0	395	0	35	0	0	0	0	0	0.374645	0	0	0	0	2.671
Apobec2	NP_033824	NM_009694	7.13122	224	0	0	0	30	0	0	0	0	0	0.500729	0	0	2.546
Apoc4	NP_031411	NM_007385	0	124	0	15	0	0	0	0	0	0.511468	0	0	0	0	1.925
Apoe	NP_033826	NM_009696	250.253	311	100	80	80	110	100	90	1.0831	1.08762	1.1204	1.3224	1.1277	0.672307	0.168
Apoo	NP_001186266	NM_001199337	0.136042	212	0	19	0	0	0	9.9	0	0.378936	0	0	0	0.108489	0.25
Apoo	NP_001186268	NM_001199339	0.389211	164	0	19	0	0	0	9.9	0	0.489845	0	0	0	0.140242	0.228
Apoo	NP_080949	NM_026673	24.1974	198	0	19	0	0	0	9.9	0	0.40573	0	0	0	0.11616	0.227
Apool	NP_080841	NM_026565	6.856	265	110	25	50	0	30	40	1.39823	0.39888	0.821806	0	0.397036	0.350671	0.481
App	NP_001185752	NM_001198823	2.83357	770	0	0	0	0	0	5.2	0	0	0	0	0	0.0156891	-0.927
App	NP_001185753	NM_001198824	4.99429	751	0	0	0	0	0	5.2	0	0	0	0	0	0.016086	-0.932
App	NP_001185754	NM_001198825	4.23212	733	0	0	0	0	0	5.2	0	0	0	0	0	0.016481	-0.953
App	NP_001185755	NM_001198826	4.52414	752	0	0	0	0	0	5.2	0	0	0	0	0	0.0160646	-0.934
App	NP_031497	NM_007471	65.4861	695	0	0	0	0	0	5.2	0	0	0	0	0	0.0173822	-0.94
Appl1	NP_660256	NM_145221	14.2925	707	25	20	0	50	0	90	0.119111	0.119608	0	0.264412	0	0.295739	-0.442
Appl2	NP_660255	NM_145220	23.1945	662	0	0	20	0	0	50	0	0	0.131588	0	0	0.175468	-1.299
Aprt	NP_033828	NM_009698	6.54508	180	5	0	0	20	0	0	0.0935682	0	0	0.41542	0	0	2.335
Aqp1	NP_031498	NM_007472	8.26113	269	35	70	90	40	0	10	0.438275	1.10026	1.45725	0.555952	0	0.0863641	2.595
Aqr	NP_033832	NM_009702	17.5545	1481	0	0	0	0	60	150	0	0	0	0	0.142086	0.2353	-4.488
Araf	NP_033833	NM_009703	16.1646	604	0	0	20	0	0	0	0	0	0.144224	0	0	0	2.167
Araf	NP_001153117	NM_001159645	20.9562	186	0	0	10	0	0	0	0	0	0.234171	0	0	0	1.594
Arcn1	NP_666097	NM_145985	36.4239	511	0	0	0	60	50	130	0	0	0	0.438996	0.343165	0.591028	-1.549
Arf1	NP_001123880	NM_001130408	1.64522	181	122	159	68	122.2	58	77.4	2.27045	3.71422	1.63635	2.52419	1.12384	0.993454	0.754
Arf3	NP_031504	NM_007478	35.4537	181	137	164	68	122.2	58	77.4	2.5496	3.83102	1.63635	2.52419	1.12384	0.993454	0.792
Arf4	NP_031505	NM_007479	38.3569	180	77	98	57	64	45	52.5	1.44095	2.30198	1.37926	1.32934	0.876787	0.677598	0.614
Arf5	NP_031506	NM_007480	34.6124	180	52	124	33	77.2	48	32.4	0.973109	2.91271	0.798521	1.60352	0.935239	0.418175	0.774
Arf6	NP_031507	NM_007481	8.15496	175	0	30	22	34	0	20	0	0.724823	0.547558	0.726391	0	0.265508	0.94
Arfgap1	NP_001171178	NM_001177707	0.434807	394	0	7	0	0	2	0	0	0.0751191	0	0	0.0178028	0	0.835
Arfgap1	NP_001171181	NM_001177710	6e-06	361	0	7	0	0	2	0	0	0.081986	0	0	0.0194302	0	0.844
Arfgap1	NP_665703	NM_145760	2.32895	414	0	7	0	0	2	0	0	0.0714902	0	0	0.0169427	0	0.843
Arfgap1	NP_001171177	NM_001177706	1.82174	392	0	7	0	0	2	0	0	0.0755024	0	0	0.0178936	0	0.836
Arfgap2	NP_076343	NM_023854	15.4834	520	0	17	0	30	15	15	0	0.138227	0	0.215699	0.101168	0.0670152	0.005
Arfgap2	NP_001159496	NM_001166024	0.221132	534	0	22	0	30	15	15	0	0.174193	0	0.210044	0.0985154	0.0652582	0.1
Arfgef1	NP_001095900	NM_001102430	31.5915	1846	0	10	0	0	0	165	0	0.0229043	0	0	0	0.207653	-3.071
Arfgef2	NP_001078964	NM_001085495	6.79203	1792	0	40	0	10	10	125	0	0.094378	0	0.0208637	0.0195711	0.162053	-1.454
Arfip1	NP_001074562	NM_001081093	9.23854	373	0	0	0	0	0	10	0	0	0	0	0	0.062284	-1.572
Arfip2	NP_084078	NM_029802	16.3993	341	0	0	0	10	30	10	0	0	0	0.109642	0.308547	0.0681288	-1.634
Arfrp1	NP_001159463	NM_001165991	0.301017	201	145	100	60	0	0	0	2.42998	2.10355	1.30017	0	0	0	4.751
Arg2	NP_033835	NM_009705	4.16807	354	15	35	20	0	0	0	0.142731	0.418036	0.246077	0	0	0	3.306
Arglu1	NP_789819	NM_176849	37.8085	271	0	30	20	0	50	0	0	0.468059	0.321444	0	0.647075	0	-0.478
Arhgap1	NP_666236	NM_146124	0.639403	439	42	42	25	85	20	40	0.322267	0.404514	0.248039	0.723909	0.159779	0.21168	0.679
Arhgap1	NP_001139374	NM_001145902	4.07589	479	47	42	25	85	20	40	0.330516	0.370734	0.227326	0.663458	0.146436	0.194004	0.702
Arhgap17	NP_001116113	NM_001122641	2.07099	768	0	0	4	0	0	0	0	0	0.0226853	0	0	0	0.983
Arhgap17	NP_001116115	NM_001122643	6.9e-05	727	0	0	4	0	0	0	0	0	0.0239646	0	0	0	0.961
Arhgap17	NP_001116114	NM_001122642	0.095608	740	0	0	4	0	0	0	0	0	0.0235436	0	0	0	0.969
Arhgap17	NP_653112	NM_144529	3.2526	846	0	0	4	0	0	0	0	0	0.0205937	0	0	0	0.941
Arhgap17	NP_001116112	NM_001122640	0.383632	818	0	0	4	0	0	0	0	0	0.0212986	0	0	0	0.93
Arhgap26	NP_780373	NM_175164	6.33347	814	0	0	0	0	0	30	0	0	0	0	0	0.0856214	-2.618
Arhgap32	NP_796353	NM_177379	0.783995	1740	0	0	0	0	15	0	0	0	0	0	0.030234	0	-1.95
Arhgap32	NP_001182561	NM_001195632	10.4201	2089	0	0	0	30	25	50	0	0	0	0.0536924	0.0419716	0.0556054	-1.325
Arhgap33	NP_839983	NM_178252	5.60654	1305	0	0	0	0	10	0	0	0	0	0	0.0268747	0	-1.553
Arhgap5	NP_033836	NM_009706	23.8229	1503	0	0	0	20	0	10	0	0	0	0.0497509	0	0.015457	0.269
Arhgdia	NP_598557	NM_133796	21.128	204	60	115	140	110	80	110	0.990722	2.38351	2.98912	2.01601	1.37535	1.2527	0.307
Arhgef10l	NP_001106193	NM_001112722	0.353846	1241	0	0	0	0	0	3.3	0	0	0	0	0	0.00617771	-0.539
Arhgef10l	NP_001106194	NM_001112723	4.23025	1236	0	0	0	0	0	3.3	0	0	0	0	0	0.0062027	-0.533
Arhgef10l	NP_766003	NM_172415	0.931126	1275	0	0	0	0	0	3.3	0	0	0	0	0	0.00601297	-0.539
Arhgef12	NP_081420	NM_027144	13.26	1544	0	0	0	70	0	0	0	0	0	0.169504	0	0	3.325
Arhgef17	NP_001074585	NM_001081116	5.476	2057	0	0	60	0	0	0	0	0	0.127046	0	0	0	3.174
Arhgef19	NP_766108	NM_172520	1.21028	802	30	0	0	0	0	0	0.126002	0	0	0	0	0	2.557
Arhgef2	NP_032513	NM_008487	3.07405	985	0	0	15	0	0	0	0	0	0.0663285	0	0	0	1.952
Arhgef2	NP_001185840	NM_001198911	1.4471	968	0	0	15	0	0	0	0	0	0.0674934	0	0	0	1.938
Arhgef2	NP_001185842	NM_001198913	0.918683	956	0	0	15	0	0	20	0	0	0.0683406	0	0	0.0486024	-0.645
Arhgef2	NP_001185841	NM_001198912	4.71102	958	0	0	15	0	0	0	0	0	0.0681979	0	0	0	1.917
Arhgef4	NP_898840	NM_183019	5.57357	484	0	0	0	0	30	0	0	0	0	0	0.217385	0	-2.61
Arhgef6	NP_690014	NM_152801	0.648607	795	0	0	6	0	0	0	0	0	0.0328722	0	0	0	1.21
Arhgef7	NP_001106990	NM_001113518	6.31112	705	0	0	6	0	0	0	0	0	0.0370687	0	0	0	1.234
Arhgef7	NP_059098	NM_017402	5.59978	646	0	0	6	0	0	0	0	0	0.0404542	0	0	0	1.221
Arid1a	NP_001074288	NM_001080819	24.5645	2283	0	0	0	0	110	75	0	0	0	0	0.168982	0.0763204	-4.466
Arid1b	NP_001078824	NM_001085355	6.27592	2244	0	0	0	0	70	45	0	0	0	0	0.109403	0.0465881	-4.009
Arid2	NP_780460	NM_175251	14.7288	1828	0	0	0	0	40	0	0	0	0	0	0.0767428	0	-2.919
Arih1	NP_064311	NM_019927	19.2198	555	0	0	0	0	0	30	0	0	0	0	0	0.125578	-2.627
Arl1	NP_080135	NM_025859	45.0052	181	0	25	0	30	0	10	0	0.583996	0	0.619687	0	0.128353	1.178
Arl13b	NP_080853	NM_026577	17.1372	427	195	20	0	0	0	0	1.53829	0.198039	0	0	0	0	4.438
Arl15	NP_766183	NM_172595	7.11236	204	0	0	0	10	20	10	0	0	0	0.183273	0.343838	0.113882	-1.351
Arl2	NP_062696	NM_019722	18.7375	184	15	15	0	0	10	0	0.274602	0.344685	0	0	0.190606	0	0.588
Arl3	NP_062692	NM_019718	156.231	182	250	370	210	280	50	80	4.627	8.59566	5.02566	5.75197	0.963502	1.02118	1.648
Arl5a	NP_892039	NM_182994	13.3465	179	0	7	0	0	0	3.3	0	0.165346	0	0	0	0.0428298	0.415
Arl5b	NP_083742	NM_029466	6.14037	180	0	17	0	0	0	3.3	0	0.399324	0	0	0	0.0425919	1.149
Arl5c	NP_997114	NM_207231	1.66587	179	0	0	0	0	0	3.3	0	0	0	0	0	0.0428298	-0.55
Arl6	NP_062639	NM_019665	84.1779	186	190	135	110	250	30	50	3.44089	3.06881	2.57588	5.02524	0.565669	0.624514	1.655
Arl6ip5	NP_075368	NM_022992	36.367	188	10	40	0	0	80	0	0.179173	0.899603	0	0	1.4924	0	-0.952
Arl8a	NP_081099	NM_026823	33.2906	186	0	62	25	5	75	45	0	1.40938	0.585426	0.100505	1.41417	0.562063	-0.752
Arl8b	NP_080287	NM_026011	23.6605	186	70	92	55	5	85	75	1.2677	2.09133	1.28794	0.100505	1.60273	0.936772	-0.171
Armc10	NP_080310	NM_026034	9.24356	306	0	5	0	0	20	30	0	0.0690871	0	0	0.229225	0.227764	-2.345
Armcx2	NP_080415	NM_026139	0.934986	784	0	0	0	0	0	10	0	0	0	0	0	0.0296326	-1.53
Armcx3	NP_082146	NM_027870	20.0446	379	0	0	0	0	10	0	0	0	0	0	0.0925369	0	-1.555
Arpc1a	NP_062741	NM_019767	22.9331	370	0	30	10	50	60	90	0	0.342822	0.117718	0.50524	0.568727	0.565101	-1.001
Arpc1b	NP_075631	NM_023142	2.84562	372	0	0	0	5	20	10	0	0	0	0.0502524	0.188556	0.0624514	-1.85
Arpc2	NP_083987	NM_029711	56.079	300	0	0	10	30	80	90	0	0	0.145186	0.373878	0.935239	0.696958	-1.902
Arpc3	NP_062798	NM_019824	38.968	178	60	45	30	20	30	50	1.13543	1.06891	0.734085	0.420088	0.591092	0.652582	0.164
Arpc4	NP_001163956	NM_001170485	0.084389	91	10	0	0	0	0	0	0.37016	0	0	0	0	0	1.584
Arpc4	NP_001163957	NM_001170486	0.149132	78	10	0	0	0	0	0	0.431853	0	0	0	0	0	1.597
Arpc4	NP_080828	NM_026552	8.95741	168	0	70	50	60	90	90	0	1.76172	1.2963	1.33528	1.87883	1.24457	-0.496
Arpc5	NP_080645	NM_026369	21.8474	151	0	15	0	30	30	70	0	0.420013	0	0.742804	0.696784	1.07698	-1.256
Arpc5l	NP_083085	NM_028809	11.1725	153	0	20	10	20	20	40	0	0.552697	0.284678	0.488729	0.458451	0.607371	-0.668
Arpp19	NP_001136127	NM_001142655	12.1539	145	0	0	0	3.3	0	0	0	0	0	0.0850895	0	0	0.841
Arr3	NP_573468	NM_133205	23.0823	381	15	10	0	40	10	0	0.132616	0.110975	0	0.392523	0.0920511	0	1.339
Arrb1	NP_835738	NM_178220	0.237585	410	0	15	0	0	15	0	0	0.154688	0	0	0.12831	0	-0.369
Arrb1	NP_796205	NM_177231	8.19285	418	0	15	0	0	15	0	0	0.151727	0	0	0.125855	0	-0.374
Arsb	NP_033842	NM_009712	8.68984	534	0	0	0	0	20	0	0	0	0	0	0.131354	0	-2.219
Arvcf	NP_258435	NM_033474	4.71978	962	0	0	0	80	90	170	0	0	0	0.310917	0.328112	0.410544	-1.645
Arxes2	NP_084099	NM_029823	28.435	180	0	0	0	0	60	30	0	0	0	0	1.16905	0.387199	-3.686
As3mt	NP_065602	NM_020577	17.8338	376	100	20	0	60	0	20	0.895866	0.224901	0	0.596614	0	0.123574	1.677
Asah1	NP_062708	NM_019734	14.8294	394	25	0	0	0	0	30	0.213734	0	0	0	0	0.176893	-0.597
Asap2	NP_001004364	NM_001004364	2.2319	955	0	0	15	6.6	0	0	0	0	0.0684121	0.0258387	0	0	2.206
Asap2	NP_001128664	NM_001135192	2.03097	1000	60	0	15	6.6	0	20	0.202107	0	0.0653336	0.0246759	0	0.0464639	0.894
Asap2	NP_001091637	NM_001098168	7.10975	958	0	0	0	6.6	0	0	0	0	0	0.0257578	0	0	1.282
Asf1a	NP_079817	NM_025541	6.56136	204	0	0	0	0	0	10	0	0	0	0	0	0.113882	-1.561
Ash2l	NP_001074262	NM_001080793	7.7047	534	0	0	0	0	0	10	0	0	0	0	0	0.0435055	-1.543
Ash2l	NP_035921	NM_011791	4.02097	623	0	0	0	0	0	10	0	0	0	0	0	0.0372904	-1.561
Asl	NP_598529	NM_133768	8.57682	464	0	35	0	40	10	50	0	0.318932	0	0.322309	0.0755851	0.250344	-0.249
Asna1	NP_062626	NM_019652	30.6114	348	0	15	10	50	70	80	0	0.182247	0.12516	0.537181	0.705461	0.534067	-1.181
Asph	NP_001171324	NM_001177853	0.21621	261	5	0	0	0	0	0	0.0645298	0	0	0	0	0	1.096
Asph	NP_001171320	NM_001177849	3.4436	725	0	2	0	0	25	40	0	0.0116638	0	0	0.120936	0.128176	-3.107
Asph	NP_075553	NM_023066	0.631568	741	0	7	0	0	25	40	0	0.0399419	0	0	0.118325	0.125409	-2.395
Asrgl1	NP_079886	NM_025610	14.8715	326	120	45	70	80	40	40	1.23992	0.583638	0.935245	0.917492	0.430325	0.285054	0.875
Ass1	NP_031520	NM_007494	1.07178	412	20	0	0	0	20	80	0.163517	0	0	0	0.17025	0.451106	-1.981
Atad2b	NP_001093098	NM_001099628	12.8804	1460	0	0	0	0	230	170	0	0	0	0	0.552496	0.270509	-5.257
Atad3a	NP_849534	NM_179203	6.21925	591	130	0	60	0	30	140	0.740946	0	0.44219	0	0.178028	0.550333	-0.379
Atcay	NP_848777	NM_178662	15.866	372	0	0	0	0	0	30	0	0	0	0	0	0.187354	-2.603
Atf1	NP_031523	NM_007497	6.25576	269	0	0	0	0	12	0	0	0	0	0	0.156453	0	-1.719
Atg2b	NP_083930	NM_029654	8.30162	2075	0	0	0	0	0	30	0	0	0	0	0	0.0335883	-2.601
Atg3	NP_080678	NM_026402	19.0644	314	0	0	20	0	0	0	0	0	0.277425	0	0	0	2.186
Atg4b	NP_777363	NM_174874	11.1375	393	0	0	0	0	0	10	0	0	0	0	0	0.0591143	-1.548
Atic	NP_080471	NM_026195	5.65228	592	0	10	0	80	20	110	0	0.0714212	0	0.50524	0.118485	0.431674	-0.843
Atl1	NP_848743	NM_178628	8.20209	558	0	0	0	0	20	0	0	0	0	0	0.125704	0	-2.213
Atl2	NP_062691	NM_019717	13.102	583	0	15	0	0	5	0	0	0.108786	0	0	0.0300785	0	0.653
Atl2	NP_835151	NM_178050	1.2668	412	0	0	0	0	5	20	0	0	0	0	0.0425625	0.112776	-2.381
Atm	NP_031525	NM_007499	3.31315	3066	0	0	0	20	0	0	0	0	0	0.0243886	0	0	2.192
Atox1	NP_033850	NM_009720	41.4421	68	0	0	0	30	0	0	0	0	0	1.64946	0	0	2.556
Atp11a	NP_056619	NM_015804	25.0575	1187	0	50	0	86.6	0	20	0	0.178102	0	0.27277	0	0.0391439	1.408
Atp11c	NP_001001798	NM_001001798	1.66069	1116	0	0	0	11.6	0	0	0	0	0	0.0388619	0	0	1.707
Atp11c	NP_001032952	NM_001037863	2.37649	1129	0	0	0	11.6	0	0	0	0	0	0.0384144	0	0	1.726
Atp12a	NP_619593	NM_138652	0.008732	1035	477	0	304	0	0	0	1.55242	0	1.27932	0	0	0	5.712
Atp13a1	NP_573487	NM_133224	7.3237	1200	0	0	10	0	60	40	0	0	0.0362964	0	0.175357	0.0774398	-2.572
Atp1a1	NP_659149	NM_144900	46.9965	1023	1008	2138	2050	2588.7	1519	1650.3	3.31906	8.83651	8.72817	9.46097	5.20758	3.74777	0.399
Atp1a2	NP_848492	NM_178405	5.92208	1020	0	961	800	797	699	850.3	0	3.98356	3.41613	2.92138	2.40343	1.93668	0.002
Atp1a3	NP_659170	NM_144921	395.931	1053	1438	2185	2270	1890.3	1709	1955.3	4.60004	8.77348	9.3895	6.71169	5.69204	4.3139	0.255
Atp1a4	NP_038762	NM_013734	0.904005	1032	324	420	738	593.4	0	0	1.05754	1.72075	3.11474	2.1498	0	0	6.671
Atp1b1	NP_033851	NM_009721	83.55	304	335	180	220	390	120	240	3.71195	2.5035	3.15206	4.79646	1.3844	1.8341	0.642
Atp1b2	NP_038201	NM_013415	413.659	290	500	255	430	480	290	460	5.80768	3.71784	6.45826	6.18832	3.50715	3.68507	0.297
Atp1b3	NP_031528	NM_007502	27.1834	278	60	10	0	110	90	110	0.727005	0.152091	0	1.47937	1.13541	0.919249	-0.597
Atp2a1	NP_031530	NM_007504	0.225222	994	0	122	0	0	0	0	0	0.518946	0	0	0	0	3.863
Atp2a2	NP_001103610	NM_001110140	6.05284	1044	77	125	155	95	245	280	0.24844	0.506242	0.646661	0.340215	0.823038	0.623079	-0.649
Atp2a2	NP_033852	NM_009722	0.09515	998	30	125	145	95	245	280	0.101256	0.529576	0.632824	0.355896	0.860973	0.651798	-0.784
Atp2b1	NP_080758	NM_026482	54.4487	1220	95	478	537	567.3	443	779	0.262298	1.6566	1.91717	1.73853	1.2735	1.48342	-0.183
Atp2b2	NP_001031761	NM_001036684	7.55417	1198	0	423	378	612.3	323	417.4	0	1.49291	1.3743	1.9109	0.945583	0.809433	0.15
Atp2b3	NP_796210	NM_177236	3.39375	1220	0	145	153	177.3	163	244	0	0.502524	0.546231	0.543349	0.468578	0.464639	-0.342
Atp2b4	NP_001161421	NM_001167949	3.21247	1166	0	66	0	0	0	209.1	0	0.239328	0	0	0	0.416621	-1.613
Atp2b4	NP_998781	NM_213616	2.34352	1205	0	103	119	142.5	190	0	0	0.361409	0.430135	0.442138	0.552994	0	0.151
Atp2c1	NP_001240760	NM_001253831	9.24774	952	93	13	72	6.6	9	33	0.329061	0.0577371	0.329413	0.0259201	0.0331558	0.0805309	0.989
Atp2c1	NP_778190	NM_175025	7.79304	918	15	13	72	6.6	9	33	0.0550401	0.0598755	0.341613	0.0268801	0.0343838	0.0835135	0.441
Atp2c1	NP_001240765	NM_001253836	6.42919	669	83	11	72	6.6	9	33	0.41791	0.0695209	0.468761	0.0368848	0.0471814	0.114597	0.924
Atp4a	NP_061201	NM_018731	0.083497	1025	377	515	391	418.5	330	292.5	1.23893	2.12438	1.66149	1.52652	1.12913	0.66296	0.506
Atp5a1	NP_031531	NM_007505	178.529	553	1890	1445	1830	1210	1240	1450	11.5124	11.0482	14.4136	8.18069	7.86413	6.09156	0.364
Atp5b	NP_058054	NM_016774	317.047	529	3690	1980	2070	1290	1560	1560	23.4964	15.8255	17.0435	9.11725	10.3424	6.85101	0.563
Atp5c1	NP_001106209	NM_001112738	1.36437	274	207	160	145	90	120	100	2.54478	2.46898	2.30496	1.22807	1.53598	0.847881	0.509
Atp5c1	NP_065640	NM_020615	141.775	298	217	170	145	90	120	100	2.45287	2.41202	2.11932	1.12916	1.41227	0.779595	0.541
Atp5d	NP_079589	NM_025313	48.2919	168	60	65	60	40	40	50	1.20302	1.63588	1.55556	0.890185	0.835035	0.691427	0.421
Atp5e	NP_080259	NM_025983	61.0091	52	60	105	80	30	30	30	3.88668	8.53758	6.70088	2.15699	2.02335	1.3403	1.032
Atp5f1	NP_033855	NM_009725	86.7513	256	225	165	180	30	100	190	2.96056	2.72516	3.06251	0.438138	1.36998	1.72425	0.228
Atp5h	NP_082138	NM_027862	180.683	161	160	150	160	50	160	210	3.34753	3.93925	4.32852	1.16111	3.48536	3.03025	-0.16
Atp5j	NP_058035	NM_016755	62.894	108	30	45	30	0	0	0	0.935682	1.76172	1.20988	0	0	0	3.719
Atp5j2	NP_065607	NM_020582	150.212	88	170	100	120	10	170	80	6.50724	4.8047	5.93942	0.424861	6.77517	2.11199	-0.028
Atp5k	NP_031533	NM_007507	211.645	71	190	210	100	30	130	120	9.01418	12.5057	6.13461	1.57977	6.42154	3.92652	0.252
Atp5l	NP_038823	NM_013795	135.235	103	105	90	60	20	40	110	3.43386	3.69449	2.53723	0.725977	1.362	2.48108	0.108
Atp6ap1	NP_061264	NM_018794	65.0015	463	50	10	30	0	80	90	0.363764	0.0913204	0.282218	0	0.605987	0.451593	-1.132
Atp6ap2	NP_081715	NM_027439	28.7094	350	0	0	0	0	20	20	0	0	0	0	0.200408	0.132754	-2.871
Atp6v0a1	NP_058616	NM_016920	45.6435	838	0	77	95	115.8	79	209	0	0.388504	0.49377	0.516648	0.330626	0.579412	-0.499
Atp6v0a1	NP_001229980	NM_001243051	2.63921	839	0	77	95	115.8	79	209	0	0.388041	0.493182	0.516032	0.330232	0.578722	-0.497
Atp6v0a1	NP_001229979	NM_001243050	1.96947	832	0	77	95	115.8	79	209	0	0.391306	0.497331	0.520373	0.33301	0.583591	-0.5
Atp6v0a1	NP_001229978	NM_001243049	8.70766	779	0	25	0	0	0	0	0	0.135691	0	0	0	0	2.392
Atp6v0a2	NP_035726	NM_011596	9.20677	856	0	45	50	40	0	0	0	0.222273	0.254414	0.174709	0	0	3.96
Atp6v0c	NP_033859	NM_009729	77.9058	155	0	65	0	0	0	0	0	1.77309	0	0	0	0	3.286
Atp6v0d1	NP_038505	NM_013477	67.9049	351	160	100	140	140	210	160	1.53548	1.2046	1.73726	1.49125	2.09829	1.05901	-0.119
Atp6v1a	NP_031534	NM_007508	46.5145	617	465	395	580	840	670	1080	2.53862	2.70683	4.09438	5.09007	3.80841	4.06653	-0.234
Atp6v1b2	NP_031535	NM_007509	87.9711	511	575	380	450	530	530	730	3.79034	3.14421	3.83563	3.87779	3.63755	3.31885	-0.07
Atp6v1c1	NP_079770	NM_025494	27.5209	382	100	165	50	80	140	130	0.881795	1.82629	0.570101	0.78299	1.28534	0.790616	-0.118
Atp6v1c2	NP_001153104	NM_001159632	0.000589	437	0	2	0	0	0	0	0	0.0193507	0	0	0	0	0.635
Atp6v1c2	NP_598460	NM_133699	0.058094	427	0	2	0	0	0	0	0	0.0198039	0	0	0	0	0.614
Atp6v1d	NP_076210	NM_023721	51.2889	247	0	15	80	80	80	110	0	0.256769	1.41071	1.21094	1.13592	1.03462	-0.576
Atp6v1e1	NP_031536	NM_007510	76.5926	226	230	220	280	240	270	250	3.42807	4.11588	5.39628	3.97038	4.18996	2.5699	0.125
Atp6v1f	NP_079657	NM_025381	57.5953	119	15	90	20	100	60	60	0.424595	3.19775	0.732029	3.14183	1.76831	1.17136	0.129
Atp6v1g1	NP_077135	NM_024173	59.3578	118	50	70	20	50	30	50	1.42731	2.50821	0.738232	1.58423	0.891648	0.984404	0.37
Atp6v1g2	NP_075668	NM_023179	45.7591	118	5	50	100	30	10	40	0.142731	1.79158	3.69116	0.950537	0.297216	0.787523	0.819
Atp6v1h	NP_598587	NM_133826	25.7293	483	85	100	150	190	200	310	0.592792	0.87539	1.35266	1.47074	1.45224	1.49108	-0.471
Atp7a	NP_001103227	NM_001109757	0.897524	1492	0	0	0	5	0	0	0	0	0	0.0125294	0	0	1.088
Atp7a	NP_033856	NM_009726	3.06192	1491	0	0	0	5	0	0	0	0	0	0.0125378	0	0	1.086
Atp8a1	NP_001034088	NM_001038999	2.98441	1164	0	22	0	0	0	83.3	0	0.0799132	0	0	0	0.166256	-1.72
Atp8a1	NP_033857	NM_009727	5.6379	1149	0	22	0	0	0	83.3	0	0.0809564	0	0	0	0.168426	-1.725
Atp8a2	NP_056618	NM_015803	24.9777	1148	90	232	240	0	30	73.3	0.264077	0.854466	0.910572	0	0.0916502	0.148336	1.202
Atp9a	NP_056546	NM_015731	34.5144	1047	10	35	120	20	0	60	0.0321724	0.141342	0.499206	0.0714189	0	0.133134	0.618
Atpaf1	NP_851383	NM_181040	7.13976	348	55	0	0	0	0	0	0.532371	0	0	0	0	0	3.107
Atpif1	NP_031538	NM_007512	190.241	106	65	195	140	30	10	60	2.06556	7.77817	5.75264	1.05814	0.330863	1.31502	1.321
Atrn	NP_033860	NM_009730	13.6716	1428	0	0	0	0	0	10	0	0	0	0	0	0.0162689	-1.54
Atrx	NP_033556	NM_009530	41.2601	2476	0	0	0	0	140	200	0	0	0	0	0.198304	0.187657	-5.011
Atxn10	NP_058539	NM_016843	55.4566	475	0	0	0	0	0	70	0	0	0	0	0	0.342365	-3.471
Atxn1l	NP_001074399	NM_001080930	6.3513	687	0	0	0	0	50	0	0	0	0	0	0.255251	0	-3.109
Atxn2	NP_033151	NM_009125	24.9071	1286	0	110	0	90	0	50	0	0.36166	0	0.261656	0	0.0903263	0.887
Atxn2l	NP_898841	NM_183020	26.5846	1049	0	185	0	110	0	90	0	0.745667	0	0.392055	0	0.199321	0.688
AU040320	NP_001030602	NM_001035525	2.90966	1085	0	7	0	20	0	0	0	0.0272783	0	0.0689176	0	0	2.426
AU040320	NP_598647	NM_133886	8.80814	1048	0	27	0	20	0	0	0	0.108931	0	0.0713507	0	0	2.928
Auh	NP_057918	NM_016709	17.6388	314	245	170	220	0	60	70	2.62825	2.28912	3.05167	0	0.670156	0.517909	1.091
Aup1	NP_031543	NM_007517	21.3637	439	0	0	0	0	30	0	0	0	0	0	0.239668	0	-2.604
Aurkaip1	NP_079614	NM_025338	14.6779	200	0	5	0	0	0	0	0	0.105703	0	0	0	0	1.111
Avl9	NP_084511	NM_030235	8.55841	649	0	0	0	0	0	10	0	0	0	0	0	0.0357965	-1.559
AW549877	NP_666042	NM_145930	64.8885	294	45	25	0	10	10	0	0.51558	0.359535	0	0.127169	0.119291	0	1.528
Azi1	NP_033864	NM_009734	3.9659	1059	60	45	90	80	0	0	0.190847	0.179666	0.370162	0.282438	0	0	4.658
B230208H17Rik	NP_001019787	NM_001024616	13.9527	725	0	0	0	0	0	80	0	0	0	0	0	0.256352	-3.623
B2m	NP_033865	NM_009735	26.0373	119	0	15	0	10	0	0	0	0.532958	0	0.314183	0	0	2.339
B3galt6	NP_536693	NM_080445	2.52291	325	105	5	0	0	0	0	1.08827	0.0650482	0	0	0	0	3.764
B3gat3	NP_077218	NM_024256	20.048	335	80	30	50	0	40	0	0.804407	0.378639	0.650085	0	0.418764	0	0.875
B3gnt1	NP_780592	NM_175383	8.66752	415	0	5	0	0	10	0	0	0.0509414	0	0	0.0845096	0	-0.83
B4galnt1	NP_082015	NM_027739	5.13494	569	0	0	30	0	0	0	0	0	0.229643	0	0	0	2.535
B4galnt1	NP_032106	NM_008080	1.23582	533	0	0	30	0	0	0	0	0	0.245154	0	0	0	2.551
B4galt1	NP_071641	NM_022305	11.1878	399	20	0	10	0	0	0	0.168845	0	0.109162	0	0	0	2.516
B4galt5	NP_062809	NM_019835	3.37075	388	20	0	0	0	0	0	0.173632	0	0	0	0	0	2.171
B9d1	NP_038745	NM_013717	9.31044	204	105	105	80	50	0	0	1.73376	2.17625	1.70807	0.916367	0	0	4.874
B9d2	NP_742160	NM_172148	12.8537	175	0	15	50	0	0	0	0	0.362411	1.24445	0	0	0	3.259
Bag5	NP_081680	NM_027404	9.65866	447	0	0	0	0	0	10	0	0	0	0	0	0.051973	-1.55
Bag6	NP_001239398	NM_001252469	6.37169	1122	25	0	9	0	9.9	0	0.0750547	0	0.0349377	0	0.0309454	0	0.731
Bag6	NP_476512	NM_057171	23.6592	1154	6	0	14	15	30	45	0.0175136	0	0.0528406	0.0485976	0.0911737	0.0905925	-1.234
Bag6	NP_001239397	NM_001252468	0.000839	1136	6	0	14	15	30	45	0.0177911	0	0.0536778	0.0493677	0.0926183	0.0920279	-1.24
Banf1	NP_035923	NM_011793	31.6395	89	30	0	0	0	0	10	1.13543	0	0	0	0	0.261033	0.634
Banp	NP_058092	NM_016812	1.78827	548	0	0	0	0	10	0	0	0	0	0	0.063999	0	-1.538
Banp	NP_001103570	NM_001110100	2.13228	545	0	0	0	0	10	0	0	0	0	0	0.0643513	0	-1.557
Basp1	NP_081671	NM_027395	81.6345	226	265	90	80	250	0	0	3.94974	1.68377	1.5418	4.13582	0	0	5.565
Bax	NP_031553	NM_007527	17.5753	192	0	10	30	10	30	30	0	0.220215	0.680558	0.194728	0.547992	0.362999	-0.663
Baz1b	NP_035844	NM_011714	15.4653	1479	0	0	0	0	40	0	0	0	0	0	0.0948519	0	-2.878
Bbip1	NP_001182267	NM_001195338	6.00358	67	15	40	30	20	0	0	0.754132	2.52426	1.95026	1.11605	0	0	3.715
Bbs1	NP_001028300	NM_001033128	17.492	593	720	355	420	710	0	20	4.08986	2.53118	3.08489	4.47645	0	0.0783539	4.176
Bbs2	NP_080392	NM_026116	17.0143	721	655	420	380	660	0	30	3.06011	2.46299	2.29559	3.42246	0	0.0966655	3.741
Bbs4	NP_780534	NM_175325	34.9297	520	1010	570	320	450	0	0	6.54258	4.63468	2.68035	3.23548	0	0	6.809
Bbs5	NP_082560	NM_028284	33.9749	341	205	115	130	190	0	10	2.02502	1.42591	1.66048	2.08319	0	0.0681288	3.606
Bbs7	NP_082086	NM_027810	39.2403	715	470	365	450	500	10	0	2.21423	2.15842	2.74127	2.61453	0.049051	0	4.635
Bbs9	NP_848502	NM_178415	5.94105	880	770	460	340	860	0	0	2.9474	2.21016	1.68283	3.65381	0	0	6.825
BC003331	NP_663486	NM_145511	14.3477	447	0	0	0	0	5	0	0	0	0	0	0.0392298	0	-0.908
BC003331	NP_001070705	NM_001077237	0.200973	415	0	0	0	0	5	0	0	0	0	0	0.0422548	0	-0.922
BC005764	NP_859009	NM_181681	6.03321	716	0	0	0	0	50	40	0	0	0	0	0.244913	0.129787	-3.7
BC017158	NP_663565	NM_145590	9.11065	466	0	0	30	0	50	50	0	0	0.280402	0	0.376303	0.24927	-1.613
BC026585	NP_001028456	NM_001033284	1.84453	350	0	0	0	0	10	0	0	0	0	0	0.100204	0	-1.567
BC027072	NP_666194	NM_146082	32.2005	1279	0	20	0	0	0	0	0	0.0661162	0	0	0	0	2.181
BC048355	NP_997044	NM_207161	1.50885	173	0	0	0	10	0	0	0	0	0	0.216114	0	0	1.606
Bcam	NP_065232	NM_020486	4.61354	622	0	50	70	70	50	30	0	0.339882	0.490177	0.420763	0.281925	0.112051	0.373
Bcap31	NP_036190	NM_012060	27.2366	245	40	0	20	0	0	10	0.549952	0	0.355557	0	0	0.0948242	1.276
Bcas2	NP_080878	NM_026602	34.5988	225	0	0	40	20	90	60	0	0	0.774324	0.332336	1.40286	0.619518	-1.391
Bcat1	NP_001019639	NM_001024468	14.9645	453	0	27	40	55	5	25	0	0.252008	0.384598	0.453936	0.0387102	0.128212	0.922
Bcat1	NP_031558	NM_007532	2.29679	386	0	27	20	55	5	25	0	0.29575	0.225677	0.532728	0.0454294	0.150466	0.743
Bcat2	NP_033867	NM_009737	1.03472	393	0	0	0	0	10	5	0	0	0	0	0.0892404	0.0295572	-1.877
Bcat2	NP_001229981	NM_001243052	0.907815	353	0	10	0	0	5	5	0	0.119777	0	0	0.0496763	0.0329064	-0.214
Bckdha	NP_031559	NM_007533	6.41383	446	20	0	0	0	0	60	0.151052	0	0	0	0	0.312537	-1.483
Bcl2l1	NP_033873	NM_009743	13.8666	233	0	0	0	0	20	10	0	0	0	0	0.301043	0.0997079	-2.584
Bcl2l13	NP_705736	NM_153516	7.55256	434	75	0	30	20	50	20	0.582106	0	0.301076	0.172294	0.404049	0.10706	0.089
Bcl7c	NP_033876	NM_009746	4.11425	217	0	0	0	0	30	0	0	0	0	0	0.484859	0	-2.588
Bclaf1	NP_001020564	NM_001025393	1.62441	870	1	0	26	0	56	0	0.00387179	0	0.130167	0	0.225747	0	-1.183
Bclaf1	NP_001020563	NM_001025392	28.5342	919	1	0	16	0	56	125	0.00366535	0	0.0758315	0	0.213711	0.315995	-2.778
Bclaf1	NP_722482	NM_153787	7.43644	917	1	0	16	0	56	125	0.00367334	0	0.0759969	0	0.214177	0.316684	-2.785
Bcor	NP_778211	NM_175046	0	1707	0	0	0	0	2	0	0	0	0	0	0.00410914	0	-0.136
Bcor	NP_778210	NM_175045	8.3e-05	1725	0	0	0	0	2	0	0	0	0	0	0.00406626	0	-0.107
Bcor	NP_083786	NM_029510	5.20038	1759	0	0	0	0	2	0	0	0	0	0	0.00398766	0	-0.113
Bcor	NP_778209	NM_175044	0	1741	0	0	0	0	2	0	0	0	0	0	0.00402889	0	-0.14
Bcr	NP_001074881	NM_001081412	6.81764	1270	0	0	0	0	40	37.5	0	0	0	0	0.110461	0.0685982	-3.531
Bdh1	NP_780386	NM_175177	0.102254	343	155	85	90	40	60	100	1.52219	1.04779	1.14286	0.436009	0.613495	0.677316	0.34
Bdh2	NP_001165526	NM_001172055	2.21105	255	0	20	35	20	0	10	0	0.331618	0.597824	0.293238	0	0.0911056	1.469
Bdh2	NP_081484	NM_027208	0.007852	245	0	0	25	20	0	10	0	0	0.444446	0.305206	0	0.0948242	0.991
Bet1	NP_033878	NM_009748	7.26615	118	0	0	0	0	20	0	0	0	0	0	0.594432	0	-2.219
Bfsp1	NP_033881	NM_009751	0.940425	663	0	0	0	90	0	330	0	0	0	0.507527	0	1.15634	-1.774
Bfsp2	NP_001002896	NM_001002896	0.390085	416	0	0	0	70	0	240	0	0	0	0.629121	0	1.3403	-1.696
Bicd1	NP_033883	NM_009753	2.6628	835	7	0	0	0	0	0	0.0282385	0	0	0	0	0	1.315
Bin1	NP_033798	NM_009668	60.7972	588	12	34	45	80	23	155	0.068744	0.244484	0.333335	0.508677	0.137184	0.612406	-0.538
Bin1	NP_001076803	NM_001083334	31.1055	477	5	24	0	0	23	0	0.0353088	0.212736	0	0	0.169108	0	-0.235
Blmh	NP_848760	NM_178645	21.9734	455	0	35	0	120	10	120	0	0.325241	0	0.986052	0.0770802	0.61271	-0.31
Bloc1s1	NP_056555	NM_015740	41.578	125	0	35	30	10	0	0	0	1.18388	1.04534	0.299102	0	0	3.37
Blvra	NP_080954	NM_026678	5.45664	295	0	0	0	0	20	20	0	0	0	0	0.237773	0.157505	-2.881
Blzf1	NP_001153681	NM_001160209	5.74819	403	0	0	10	0	0	0	0	0	0.108079	0	0	0	1.588
Bmpr2	NP_031587	NM_007561	18.319	1038	0	0	0	30	0	0	0	0	0	0.108057	0	0	2.558
Bnip1	NP_742161	NM_172149	6.31536	228	0	0	0	0	10	0	0	0	0	0	0.153822	0	-1.552
Bola1	NP_081251	NM_026975	6.944	137	40	70	0	0	0	20	0.983491	2.16036	0	0	0	0.339152	1.195
Bola2	NP_780312	NM_175103	36.7705	86	0	30	0	20	0	0	0	1.47493	0	0.869483	0	0	3.004
Bop1	NP_038509	NM_013481	5.94071	732	0	0	0	0	0	10	0	0	0	0	0	0.0317376	-1.544
Bpgm	NP_031589	NM_007563	23.5419	259	0	0	0	20	0	0	0	0	0	0.288709	0	0	2.203
Bphl	NP_080788	NM_026512	5.63898	291	45	50	50	0	50	30	0.520895	0.726483	0.74838	0	0.602603	0.239504	0.106
Bpnt1	NP_035924	NM_011794	21.8012	308	135	125	50	120	60	100	1.47643	1.71596	0.707073	1.45667	0.683211	0.754284	0.493
Bptf	NP_789820	NM_176850	17.5586	2921	0	0	0	0	40	0	0	0	0	0	0.0480267	0	-2.887
Braf	NP_647455	NM_139294	15.4273	804	0	0	0	0	0	50	0	0	0	0	0	0.144477	-3.116
Brca2	NP_033895	NM_009765	1.11146	3329	0	0	0	10	0	0	0	0	0	0.0112309	0	0	1.587
Brcc3	NP_001159929	NM_001166457	8.02436	291	0	0	0	0	10	10	0	0	0	0	0.120521	0.0798348	-2.161
Brd1	NP_001028446	NM_001033274	8.03519	1189	0	0	0	0	80	0	0	0	0	0	0.235973	0	-3.603
Brd2	NP_034368	NM_010238	3.5798	798	0	0	0	0	20	43.3	0	0	0	0	0.0878984	0.126058	-3.33
Brd3	NP_001107045	NM_001113573	8.36209	726	0	0	0	0	133	129.8	0	0	0	0	0.642494	0.415359	-4.811
Brd4	NP_932762	NM_198094	6.78786	723	0	0	0	0	23	28.1	0	0	0	0	0.111569	0.0902929	-3.116
Brd4	NP_065254	NM_020508	8.38441	1400	0	0	0	0	23	28.1	0	0	0	0	0.0576174	0.0466298	-3.147
Brd8	NP_084423	NM_030147	18.4393	951	0	0	0	0	10	0	0	0	0	0	0.0368785	0	-1.536
Bri3bp	NP_084028	NM_029752	6.3056	253	0	0	0	0	30	20	0	0	0	0	0.415867	0.183652	-3.107
Brox	NP_082137	NM_027861	14.2789	411	0	0	0	10	0	0	0	0	0	0.0909679	0	0	1.595
Brsk1	NP_001003920	NM_001003920	7.97762	778	0	0	0	0	22	0	0	0	0	0	0.0991738	0	-2.302
Brsk2	NP_001009929	NM_001009929	7.76149	675	0	0	0	0	12	13.2	0	0	0	0	0.0623493	0.0454313	-2.384
Brsk2	NP_083702	NM_029426	13.7735	653	0	0	0	0	12	13.2	0	0	0	0	0.0644499	0.0469619	-2.392
Brsk2	NP_001009930	NM_001009930	6.18578	719	0	0	0	0	12	13.2	0	0	0	0	0.0585338	0.0426511	-2.408
Brwd1	NP_001096649	NM_001103179	8.19275	2259	17	0	0	0	0	0	0.0253492	0	0	0	0	0	2.037
Brwd1	NP_660107	NM_145125	6.36721	2304	27	0	0	0	0	0	0.0394741	0	0	0	0	0	2.429
Bsg	NP_001070652	NM_001077184	148.539	273	475	185	340	376.6	110	90	5.86087	2.86522	5.42452	5.1576	1.41314	0.765888	1.431
Bsg	NP_033898	NM_009768	52.8377	389	272	147	255	340	90	95	2.35532	1.59778	2.85519	3.26783	0.811422	0.567361	1.204
Bsn	NP_031593	NM_007567	7.24836	3942	0	70	90	0	160	0	0	0.075081	0.0994423	0	0.14235	0	-0.495
Btaf1	NP_001074175	NM_001080706	10.5745	1848	0	0	0	0	20	0	0	0	0	0	0.0379561	0	-2.207
Btbd3	NP_663509	NM_145534	1.44061	530	15	0	0	0	0	0	0.0953336	0	0	0	0	0	1.935
Btf3l4	NP_081729	NM_027453	21.3379	158	0	5	0	0	0	0	0	0.133802	0	0	0	0	1.1
Btrc	NP_001032847	NM_001037758	16.1666	605	0	0	6	0	0	0	0	0	0.0431957	0	0	0	1.236
Btrc	NP_033901	NM_009771	1.73009	569	0	0	6	0	0	0	0	0	0.0459287	0	0	0	1.222
Bub3	NP_033904	NM_009774	16.1633	326	0	0	0	0	190	140	0	0	0	0	2.04404	0.99769	-4.93
Bud13	NP_666112	NM_146000	6.23247	637	0	0	0	0	10	0	0	0	0	0	0.0550573	0	-1.565
Bysl	NP_058555	NM_016859	6.04533	436	0	0	0	0	40	0	0	0	0	0	0.321757	0	-2.909
Bzw1	NP_080100	NM_025824	54.212	419	35	0	0	0	30	35	0.281375	0	0	0	0.251108	0.194061	-1.038
Bzw2	NP_080116	NM_025840	31.994	419	0	0	0	20	20	35	0	0	0	0.178462	0.167406	0.194061	-1.377
C030006K11Rik	NP_663447	NM_145472	3.75956	218	0	0	20	0	0	0	0	0	0.399594	0	0	0	2.178
C1qb	NP_033907	NM_009777	7.48832	253	0	0	20	0	0	0	0	0	0.344314	0	0	0	2.192
C1qbp	NP_031599	NM_007573	18.9346	279	0	0	70	0	0	50	0	0	1.0928	0	0	0.416343	-0.136
C1qc	NP_031600	NM_007574	5.73973	246	0	0	20	0	0	0	0	0	0.354111	0	0	0	2.196
C2cd2l	NP_082185	NM_027909	57.299	706	95	45	100	40	170	220	0.453262	0.269499	0.616936	0.211829	0.844497	0.723941	-0.834
C2cd5	NP_084173	NM_029897	6.63281	999	0	0	0	16.5	50	16.5	0	0	0	0.0617516	0.175533	0.0383711	-1.735
C330007P06Rik	NP_084227	NM_029951	10.723	222	0	0	0	0	10	0	0	0	0	0	0.15798	0	-1.555
C7	NP_001230766	NM_001243837	0.00813	845	0	0	0	20	0	0	0	0	0	0.0884918	0	0	2.173
C77080	NP_001028361	NM_001033189	2.55924	1070	0	0	0	10	0	0	0	0	0	0.0349419	0	0	1.621
Cab39	NP_598542	NM_133781	28.1282	341	0	5	0	20	0	0	0	0.0619961	0	0.219283	0	0	2.331
Cabp4	NP_653115	NM_144532	50.9329	271	5	30	0	30	0	0	0.0621486	0.468059	0	0.413887	0	0	3.213
Cacna1f	NP_062528	NM_019582	25.1566	1984	0	0	0	0	0	10	0	0	0	0	0	0.0117096	-1.541
Cacna2d1	NP_001104313	NM_001110843	1.3e-05	1103	0	18	19	22.3	25	35.6	0	0.0689995	0.075028	0.0755891	0.0794911	0.0749825	-0.502
Cacna2d1	NP_001104314	NM_001110844	4.88658	1091	0	20	11	24	27	39	0	0.0775093	0.043915	0.0822463	0.0867947	0.0830472	-0.671
Cacna2d1	NP_001104315	NM_001110845	3.23379	1086	0	20	11	24	27	39	0	0.0778662	0.0441172	0.082625	0.0871943	0.0834296	-0.659
Cacna2d1	NP_033914	NM_009784	0.62383	1084	0	18	9	22.3	25	35.6	0	0.0702089	0.0361625	0.076914	0.0808844	0.0762968	-0.686
Cacna2d1	NP_001104316	NM_001110846	0.51339	1079	0	18	9	22.3	25	35.6	0	0.0705342	0.0363301	0.0772704	0.0812592	0.0766503	-0.684
Cacna2d2	NP_001167519	NM_001174048	4.12225	1150	28	14	8	21	16	39	0.0820146	0.0514729	0.0302996	0.0682734	0.0487951	0.0787866	-0.243
Cacna2d2	NP_064659	NM_020263	0.228635	1154	27	14	8	21	16	39	0.0788113	0.0512945	0.0301946	0.0680367	0.048626	0.0785135	-0.254
Cacna2d2	NP_001167518	NM_001174047	2.0862	1156	28	14	8	21	16	39	0.0815889	0.0512058	0.0301424	0.067919	0.0485418	0.0783776	-0.24
Cacna2d2	NP_001167521	NM_001174050	0.504907	1148	27	14	8	21	16	39	0.0792232	0.0515626	0.0303524	0.0683923	0.0488801	0.0789238	-0.25
Cacna2d2	NP_001167520	NM_001174049	9.08098	1147	27	14	8	21	16	39	0.0792923	0.0516076	0.0303789	0.0684519	0.0489227	0.0789926	-0.26
Cacna2d4	NP_001028554	NM_001033382	48.3784	1144	20	55	50	0	60	10	0.0588891	0.203276	0.190366	0	0.183941	0.0203076	0.093
Cacnb2	NP_001239462	NM_001252533	31.6824	605	0	0	3	0	0	0	0	0	0.0215979	0	0	0	0.796
Cacnb3	NP_031607	NM_007581	2.1094	484	0	0	13	0	0	0	0	0	0.116988	0	0	0	1.805
Cacnb4	NP_666235	NM_146123	3.40022	486	0	0	3	0	0	0	0	0	0.0268862	0	0	0	0.791
Cacybp	NP_033916	NM_009786	31.2248	229	45	15	0	20	0	0	0.661923	0.276952	0	0.326531	0	0	3.452
Cad	NP_076014	NM_023525	3.10148	2225	0	10	110	0	30	180	0	0.0190028	0.215332	0	0.0472874	0.187944	-1.045
Cadm1	NP_001020771	NM_001025600	3.91659	417	22	20	12	20	25	52.5	0.177712	0.202788	0.12534	0.179318	0.210261	0.292488	-0.549
Cadm1	NP_997559	NM_207676	6.37873	428	22	7	12	20	25	52.5	0.173145	0.0691517	0.122119	0.174709	0.204857	0.284971	-0.739
Cadm1	NP_997558	NM_207675	75.9686	456	22	26	12	20	25	52.5	0.162513	0.241078	0.11462	0.163982	0.192278	0.267473	-0.46
Cadm1	NP_061240	NM_018770	3.73374	445	22	7	12	20	25	52.5	0.16653	0.06651	0.117454	0.168035	0.197031	0.274085	-0.739
Cadm2	NP_001139449	NM_001145977	3.30227	395	90	30	30	40	60	80	0.767496	0.321124	0.330803	0.378611	0.532731	0.47052	-0.192
Cadm2	NP_848836	NM_178721	11.7022	404	52	30	30	40	60	80	0.433564	0.31397	0.323434	0.370176	0.520864	0.460038	-0.413
Cadm3	NP_444429	NM_053199	78.7545	396	15	0	0	50	50	110	0.127593	0	0	0.472068	0.442822	0.645331	-1.375
Cadm4	NP_694752	NM_153112	19.8583	388	0	0	0	0	10	20	0	0	0	0	0.0903904	0.119752	-2.565
Cadps	NP_001036082	NM_001042617	26.2861	1355	0	12	0	75	105	325	0	0.0374447	0	0.206943	0.271772	0.557224	-2.079
Cadps	NP_036191	NM_012061	5.61531	1361	0	57	0	75	115	295	0	0.177078	0	0.206031	0.296342	0.503558	-1.625
Calb1	NP_033918	NM_009788	13.723	261	0	15	0	45	30	50	0	0.242996	0	0.644617	0.40312	0.445056	-0.754
Calb2	NP_031612	NM_007586	97.0564	271	85	75	60	95	150	280	1.05653	1.17015	0.964333	1.31064	1.94123	2.40035	-0.809
Calcoco1	NP_080468	NM_026192	20.2164	691	0	0	60	10	0	10	0	0	0.378197	0.0541068	0	0.0336207	1.417
Cald1	NP_663550	NM_145575	8.11707	530	85	40	60	30	20	30	0.540224	0.319104	0.493084	0.211629	0.132345	0.131502	0.967
Calm3	NP_031616	NM_007590	186.789	149	155	290	200	280	240	370	3.5041	8.22925	5.8464	7.02589	5.6491	5.769	-0.084
Calml4	NP_612177	NM_138304	5.2823	153	0	10	0	0	0	0	0	0.276349	0	0	0	0	1.596
Calr	NP_031617	NM_007591	219.676	416	225	165	80	330	280	430	1.82188	1.67702	0.83761	2.96586	2.36058	2.40138	-0.38
Calu	NP_031620	NM_007594	27.7753	315	50	0	0	0	0	0	0.534675	0	0	0	0	0	3.019
Camk1	NP_598687	NM_133926	6.02499	374	0	0	10	0	10	0	0	0	0.116459	0	0.093774	0	-0.308
Camk1d	NP_796317	NM_177343	18.5856	385	0	0	10	40	20	60	0	0	0.113132	0.388445	0.182189	0.362056	-0.929
Camk2a	NP_803126	NM_177407	4.30678	478	0	28	40	56.2	83	126.4	0	0.247673	0.364483	0.43958	0.608982	0.614334	-1.015
Camk2b	NP_001167524	NM_001174053	2.97688	545	36	8	31	34.9	37	0	0.222503	0.0620643	0.247748	0.239419	0.2381	0	0.573
Camk2b	NP_001167525	NM_001174054	7.50488	529	36	8	31	34.9	37	0	0.229233	0.0639415	0.255241	0.24666	0.245301	0	0.574
Camk2b	NP_031621	NM_007595	17.5961	542	36	8	31	34.9	57	146.4	0.223735	0.0624079	0.249119	0.240744	0.368833	0.627519	-1.114
Camk2d	NP_001020610	NM_001025439	9.45308	512	74	83	63	55.9	89	97.5	0.486847	0.68542	0.535939	0.408199	0.609641	0.442405	-0.104
Camk2d	NP_076302	NM_023813	23.81	478	64	78	53	55.9	76	97.5	0.451007	0.689946	0.48294	0.437234	0.557622	0.473873	-0.129
Camk2d	NP_001020609	NM_001025438	7.93272	499	64	78	53	55.9	76	97.5	0.432026	0.660911	0.462616	0.418833	0.534155	0.453931	-0.127
Camk2g	NP_848712	NM_178597	3.03081	529	0	27	21	26	27	77.7	0	0.215803	0.172905	0.183759	0.179004	0.341233	-0.836
Camk2g	NP_001034227	NM_001039138	7.26813	518	0	27	21	26	27	77.7	0	0.220385	0.176577	0.187661	0.182805	0.348479	-0.832
Camk2g	NP_001034228	NM_001039139	2.90719	495	0	8	21	26	27	77.7	0	0.0683335	0.184782	0.19638	0.191299	0.364671	-1.132
Camkv	NP_663596	NM_145621	15.69	512	0	30	70	40	110	170	0	0.247742	0.595488	0.292092	0.753489	0.771373	-1.183
Caml	NP_031622	NM_007596	18.9465	294	0	0	0	0	40	20	0	0	0	0	0.477163	0.15804	-3.314
Camsap1	NP_001108548	NM_001115076	27.9829	1581	0	0	0	0	0	10	0	0	0	0	0	0.0146945	-1.553
Camsap3	NP_081447	NM_027171	5.03967	1252	0	0	0	0	0	10	0	0	0	0	0	0.0185559	-1.541
Cand1	NP_082270	NM_027994	14.8888	1230	0	155	170	320	270	640	0	0.532814	0.60199	0.97269	0.769862	1.20882	-0.843
Cand2	NP_080234	NM_025958	2.5051	1235	0	0	40	20	0	40	0	0	0.141071	0.060547	0	0.0752451	-0.083
Canx	NP_031623	NM_007597	63.6679	591	240	155	230	100	440	480	1.3679	1.1089	1.69506	0.632619	2.61107	1.88686	-0.737
Cap1	NP_031624	NM_007598	31.3112	474	65	35	0	80	90	120	0.461919	0.312204	0	0.631018	0.665914	0.58815	-0.65
Cap2	NP_080332	NM_026056	3.8022	476	0	0	0	0	0	20	0	0	0	0	0	0.0976132	-2.245
Capg	NP_001035999	NM_001042534	0.000253	349	0	0	0	0	0	20	0	0	0	0	0	0.133134	-2.23
Capn2	NP_033924	NM_009794	8.2599	700	0	0	10	0	20	0	0	0	0.0622224	0	0.100204	0	-0.984
Capn6	NP_031629	NM_007603	0.534685	641	115	115	130	430	0	0	0.604325	0.758557	0.883345	2.50807	0	0	5.731
Capns1	NP_033925	NM_009795	61.7468	268	55	0	0	0	10	10	0.691287	0	0	0	0.130864	0.0866863	0.589
Caprin1	NP_058019	NM_016739	7.71394	707	55	59	33	86	23	23.1	0.262044	0.352843	0.203301	0.454788	0.114094	0.0759063	1.127
Caprin1	NP_001104761	NM_001111291	6.73527	692	53	59	33	86	23	23.1	0.257989	0.360491	0.207708	0.464646	0.116567	0.0775517	1.123
Caprin1	NP_001104760	NM_001111290	5.5054	698	55	59	33	86	23	23.1	0.265423	0.357392	0.205922	0.460652	0.115565	0.0768851	1.127
Caprin2	NP_853519	NM_181541	3.61955	1031	0	0	0	30	0	0	0	0	0	0.108791	0	0	2.568
Capza1	NP_033927	NM_009797	26.2353	286	52	37	20	60	60	95	0.612446	0.546996	0.304585	0.784359	0.735765	0.77169	-0.406
Capza2	NP_031630	NM_007604	37.7138	286	62	77	80	70	110	175	0.730225	1.13834	1.21834	0.915086	1.3489	1.42153	-0.486
Capzb	NP_001032850	NM_001037761	3.31162	277	20	50	55	0	0	0	0.24321	0.763201	0.864825	0	0	0	3.883
Capzb	NP_033928	NM_009798	61.5866	272	205	60	45	140	70	150	2.53873	0.932676	0.720591	1.92437	0.902575	1.28117	0.217
Car14	NP_035927	NM_011797	29.5715	337	350	270	410	690	150	100	3.4984	3.38753	5.29906	7.65507	1.56104	0.689375	1.431
Car2	NP_033931	NM_009801	155.003	260	75	120	90	260	100	380	0.97167	1.95145	1.5077	3.73878	1.3489	3.39544	-0.374
Car8	NP_031618	NM_007592	7.64992	291	0	0	0	0	0	10	0	0	0	0	0	0.0798348	-1.559
Carkd	NP_081271	NM_026995	2.41844	365	27	25	0	10	5	25	0.249173	0.289598	0	0.102432	0.0480431	0.159123	0.255
Carkd	NP_001177286	NM_001190357	10.0187	327	27	20	0	10	5	25	0.278129	0.258601	0	0.114336	0.0536261	0.177614	0.17
Carm1	NP_067506	NM_021531	8.18914	608	0	0	0	0	0	5	0	0	0	0	0	0.0191052	-0.909
Carm1	NP_694781	NM_153141	0.37049	585	0	0	0	0	0	5	0	0	0	0	0	0.0198564	-0.922
Cars	NP_038770	NM_013742	1.19891	831	0	0	30	5	10	30	0	0	0.157241	0.0224957	0.0422039	0.0838698	-0.575
Cars	NP_001239522	NM_001252593	6.93713	748	0	0	30	5	10	30	0	0	0.174689	0.0249918	0.046887	0.0931762	-0.574
Casc4	NP_001192298	NM_001205369	3.64945	435	0	0	7	0	0	0	0	0	0.0700897	0	0	0	1.313
Casc4	NP_950239	NM_199038	0.055496	346	0	0	7	0	0	0	0	0	0.0881185	0	0	0	1.326
Casc4	NP_796028	NM_177054	0.07195	402	0	0	7	0	0	0	0	0	0.0758433	0	0	0	1.326
Casc4	NP_001192299	NM_001205370	5.97872	379	0	0	7	10	0	0	0	0	0.0804459	0.0986485	0	0	1.995
Casd1	NP_663373	NM_145398	21.705	797	40	15	0	0	0	0	0.169057	0.0795759	0	0	0	0	3.082
Cask	NP_033936	NM_009806	9.51121	897	0	0	0	30	30	130	0	0	0	0.125043	0.117296	0.336695	-2.081
Caskin1	NP_082213	NM_027937	6.91877	1431	0	30	20	60	130	180	0	0.0886401	0.0608745	0.156762	0.318609	0.292226	-1.525
Casz1	NP_001152816	NM_001159344	35.9131	1762	0	0	0	0	160	105	0	0	0	0	0.31847	0.138442	-4.733
Casz1	NP_081471	NM_027195	3.22511	1166	0	0	0	0	0	105	0	0	0	0	0	0.209207	-3.876
Cat	NP_033934	NM_009804	14.933	527	0	10	10	160	0	60	0	0.0802302	0.0826484	1.13511	0	0.2645	0.595
Cbr1	NP_031646	NM_007620	17.1306	277	162	205	180	220	125	175	1.97	3.12912	2.83034	2.96943	1.58265	1.46772	0.439
Cbr3	NP_766635	NM_173047	2.34985	277	52	0	0	30	45	25	0.632345	0	0	0.404922	0.569753	0.209674	-0.315
Cbr4	NP_663570	NM_145595	6.92508	236	0	0	40	0	20	0	0	0	0.738232	0	0.297216	0	0.23
Cbx1	NP_031648	NM_007622	18.7185	185	0	0	0	0	93	39.9	0	0	0	0	1.76305	0.501056	-4.085
Cbx3	NP_031650	NM_007624	58.7615	183	0	0	0	0	91	112.4	0	0	0	0	1.74399	1.42692	-4.484
Cbx4	NP_031651	NM_007625	7.17613	551	0	0	0	0	20	0	0	0	0	0	0.127301	0	-2.225
Cbx5	NP_031652	NM_007626	2.33566	191	0	0	0	0	43	20	0	0	0	0	0.789567	0.243266	-3.293
Cbx6	NP_083039	NM_028763	17.2358	414	0	0	0	0	30	10	0	0	0	0	0.254141	0.0561158	-2.879
Cbx8	NP_038954	NM_013926	5.80487	362	0	0	0	0	80	50	0	0	0	0	0.77506	0.320883	-4.082
Cc2d1a	NP_666082	NM_145970	6.7466	943	0	0	60	10	0	0	0	0	0.277131	0.0396477	0	0	3.352
Cc2d2a	NP_758478	NM_172274	15.1767	1633	55	205	180	160	0	0	0.113451	0.530782	0.4801	0.366322	0	0	5.437
Ccar1	NP_080477	NM_026201	32.6664	1146	0	0	0	0	260	350	0	0	0	0	0.795688	0.709527	-5.724
Ccbl1	NP_765992	NM_172404	4.47259	424	0	45	0	40	0	30	0	0.448741	0	0.352715	0	0.164377	0.541
Ccdc104	NP_080016	NM_025740	51.0969	343	0	40	50	100	0	0	0	0.493077	0.634923	1.09002	0	0	4.297
Ccdc109a	NP_001028431	NM_001033259	10.9758	350	0	45	40	0	10	30	0	0.543617	0.49778	0	0.100204	0.199131	0.28
Ccdc115	NP_081435	NM_027159	17.22	180	0	0	10	0	30	10	0	0	0.241976	0	0.584525	0.129066	-1.635
Ccdc123	NP_082396	NM_028120	8.87735	791	30	0	0	0	0	0	0.127754	0	0	0	0	0	2.563
Ccdc124	NP_081240	NM_026964	28.4435	217	0	0	20	0	0	25	0	0	0.401435	0	0	0.267649	-0.616
Ccdc126	NP_780307	NM_175098	63.329	140	80	35	90	0	0	0	1.92483	1.05703	2.80001	0	0	0	4.392
Ccdc127	NP_077163	NM_024201	0.44175	260	35	0	0	0	10	0	0.453446	0	0	0	0.13489	0	0.764
Ccdc132	NP_077222	NM_024260	6.69535	964	0	0	0	0	0	40	0	0	0	0	0	0.0963981	-2.892
Ccdc15	NP_001074898	NM_001081429	1.59141	823	0	0	50	0	0	0	0	0	0.264616	0	0	0	3.033
Ccdc177	NP_001008423	NM_001008423	3.49987	706	0	25	60	0	0	40	0	0.149721	0.370162	0	0	0.131626	0.261
Ccdc22	NP_613069	NM_138603	6.26027	627	0	0	30	0	0	20	0	0	0.208401	0	0	0.0741051	-0.03
Ccdc41	NP_084128	NM_029852	4.6459	692	35	5	40	0	0	0	0.17037	0.0305501	0.251767	0	0	0	3.455
Ccdc47	NP_080285	NM_026009	44.9382	483	0	0	0	0	20	60	0	0	0	0	0.145224	0.288595	-3.578
Ccdc55	NP_001012309	NM_001012309	10.9459	542	0	0	0	0	20	0	0	0	0	0	0.129415	0	-2.212
Ccdc58	NP_001152894	NM_001159422	4.38624	134	0	22	0	10	0	0	0	0.694171	0	0.279013	0	0	2.581
Ccdc58	NP_941047	NM_198645	2.77782	144	0	22	0	10	0	0	0	0.645965	0	0.259637	0	0	2.562
Ccdc6	NP_001104591	NM_001111121	8.27354	469	0	0	0	0	0	20	0	0	0	0	0	0.0990701	-2.23
Ccdc85c	NP_001153382	NM_001159910	18.4923	420	92	0	0	0	0	0	0.737852	0	0	0	0	0	3.591
Ccdc88a	NP_789811	NM_176841	19.5536	1845	0	0	60	0	0	0	0	0	0.141645	0	0	0	3.181
Ccdc9	NP_001129943	NM_001136471	4.71779	589	0	0	0	0	5	5	0	0	0	0	0.0297721	0.0197215	-1.449
Ccdc9	NP_758501	NM_172297	3.84816	544	0	0	0	0	5	5	0	0	0	0	0.0322348	0.0213529	-1.447
Ccdc92	NP_659068	NM_144819	9.05281	314	0	0	0	0	0	10	0	0	0	0	0	0.073987	-1.554
Ccdc93	NP_001020327	NM_001025156	2.33631	629	0	0	0	0	0	15	0	0	0	0	0	0.0554021	-1.931
Ccdc93	NP_084231	NM_029955	1.59803	628	0	0	0	0	0	15	0	0	0	0	0	0.0554903	-1.919
Ccni	NP_059063	NM_017367	62.6828	377	0	5	0	0	0	0	0	0.056076	0	0	0	0	1.111
Ccnl1	NP_064321	NM_019937	32.1731	532	0	0	0	0	0	10	0	0	0	0	0	0.043669	-1.565
Ccny	NP_080760	NM_026484	11.4129	341	0	2	0	0	0	10	0	0.0247984	0	0	0	0.0681288	-1.309
Ccnyl1	NP_001091113	NM_001097644	4.97741	291	0	7	0	0	0	0	0	0.101708	0	0	0	0	1.337
Ccs	NP_058588	NM_016892	11.5457	274	0	0	0	10	0	0	0	0	0	0.136452	0	0	1.603
Cct2	NP_031662	NM_007636	55.5161	535	115	55	110	210	190	330	0.72406	0.434668	0.895538	1.46756	1.24553	1.433	-0.556
Cct3	NP_033966	NM_009836	44.8236	545	340	50	90	200	260	480	2.10142	0.387902	0.719269	1.37203	1.67313	2.04612	-0.586
Cct4	NP_033967	NM_009837	47.9036	539	365	65	90	190	270	530	2.28105	0.509886	0.727275	1.31794	1.75683	2.2844	-0.619
Cct5	NP_031663	NM_007637	66.8082	541	140	55	70	140	170	280	0.871689	0.429847	0.563567	0.967521	1.10206	1.20239	-0.606
Cct6a	NP_033968	NM_009838	71.2382	531	135	55	130	210	250	410	0.856387	0.437942	1.06634	1.47861	1.6512	1.7938	-0.719
Cct7	NP_031664	NM_007638	35.0135	544	85	45	60	90	170	310	0.526321	0.349754	0.480394	0.618548	1.09598	1.32388	-1.04
Cct8	NP_033970	NM_009840	53.3274	548	385	145	110	230	270	660	2.36652	1.11876	0.874294	1.5692	1.72797	2.79801	-0.565
Ccz1	NP_808350	NM_177682	20.5434	480	0	0	0	0	40	0	0	0	0	0	0.292262	0	-2.885
Cd163	NP_444324	NM_053094	0.348421	1121	0	0	0	0	0	10	0	0	0	0	0	0.0207243	-1.561
Cd200	NP_034948	NM_010818	12.907	278	0	55	50	20	50	20	0	0.836501	0.783376	0.268977	0.630782	0.167136	0.095
Cd276	NP_598744	NM_133983	10.2975	316	0	0	0	0	0	10	0	0	0	0	0	0.0735188	-1.552
Cd2ap	NP_033977	NM_009847	8.31738	637	20	0	0	0	0	0	0.10576	0	0	0	0	0	2.168
Cd2bp2	NP_081629	NM_027353	13.1449	342	0	10	0	0	20	30	0	0.12363	0	0	0.205096	0.203789	-1.869
Cd44	NP_001171256	NM_001177785	0	657	7	2	3	4.9	3	1.6	0.0358892	0.012871	0.0198885	0.0278843	0.0160144	0.0056577	0.901
Cd44	NP_001034240	NM_001039151	2.39856	365	4	2	3	4.9	3	1.6	0.0369146	0.0231679	0.0357992	0.0501918	0.0288259	0.0101839	0.691
Cd44	NP_001171257	NM_001177786	0	498	4	2	3	4.9	3	1.6	0.0270559	0.0169805	0.0262384	0.0367872	0.0211274	0.00746408	0.693
Cd44	NP_001034239	NM_001039150	0	580	4	2	3	4.9	3	1.6	0.0232307	0.0145798	0.0225288	0.0315862	0.0181404	0.00640881	0.682
Cd44	NP_033981	NM_009851	0	780	12	2	3	4.9	3	1.6	0.0518224	0.0108414	0.0167522	0.0234872	0.013489	0.00476552	1.162
Cd44	NP_001171258	NM_001177787	1.1e-05	464	4	2	3	4.9	3	1.6	0.0290384	0.0182247	0.028161	0.0394828	0.0226755	0.00801101	0.687
Cd47	NP_034711	NM_010581	18.2197	324	75	45	0	30	40	30	0.779735	0.587241	0	0.346183	0.432981	0.21511	0.27
Cd81	NP_598416	NM_133655	87.672	236	20	0	0	0	0	20	0.285462	0	0	0	0	0.196881	-0.398
Cd82	NP_031682	NM_007656	2.26665	266	15	15	30	50	0	0	0.18995	0.238429	0.49123	0.702778	0	0	3.734
Cd9	NP_031683	NM_007657	29.9309	226	0	20	0	0	0	0	0	0.374171	0	0	0	0	2.186
Cdc23	NP_848124	NM_178347	12.4309	597	0	0	0	0	60	60	0	0	0	0	0.352477	0.233487	-4.007
Cdc37	NP_058022	NM_016742	24.9683	379	40	0	0	10	20	0	0.35551	0	0	0.0986485	0.185074	0	0.425
Cdc42	NP_001230698	NM_001243769	37.7473	191	0	0	20	5	10	20	0	0	0.456081	0.0978738	0.18362	0.243266	-0.605
Cdc42	NP_033991	NM_009861	43.8899	191	147	79	20	5	33	20	2.59248	1.74881	0.456081	0.0978738	0.605947	0.243266	1.064
Cdc42bpa	NP_001028457	NM_001033285	16.4764	1732	0	0	0	15	0	15	0	0	0	0.0323797	0	0.02012	-0.368
Cdc42bpb	NP_898837	NM_183016	17.797	1713	0	0	0	95	90	105	0	0	0	0.207346	0.184263	0.142402	-1.188
Cdc42ep4	NP_001156818	NM_001163346	8.64341	349	0	0	0	0	80	40	0	0	0	0	0.803931	0.266269	-3.949
Cdc42se2	NP_848741	NM_178626	13.1792	84	12	0	0	0	0	0	0.481208	0	0	0	0	0	1.749
Cdc5l	NP_690023	NM_152810	19.7701	802	65	50	90	70	280	220	0.273004	0.263599	0.48878	0.326327	1.22444	0.637285	-1.098
Cdc73	NP_666103	NM_145991	9.17263	531	0	0	0	0	70	0	0	0	0	0	0.462336	0	-3.415
Cdh13	NP_062681	NM_019707	6.77349	714	0	0	20	0	0	0	0	0	0.122005	0	0	0	2.175
Cdh2	NP_031690	NM_007664	36.1493	906	0	20	0	0	90	80	0	0.0933363	0	0	0.348392	0.205138	-2.501
Cdh4	NP_033997	NM_009867	7.1948	913	0	0	0	0	10	10	0	0	0	0	0.0384134	0.0254457	-2.171
Cdhr1	NP_570948	NM_130878	214.76	859	285	155	100	150	0	0	1.11759	0.762934	0.507051	0.652872	0	0	5.569
Cdipt	NP_080914	NM_026638	5.08554	213	20	50	60	0	130	70	0.316287	0.99252	1.22692	0	2.14051	0.763491	-0.918
Cdk10	NP_919428	NM_194446	5.49542	360	0	0	0	0	10	0	0	0	0	0	0.0974208	0	-1.578
Cdk11b	NP_031687	NM_007661	25.2508	784	0	0	0	0	40	65	0	0	0	0	0.178936	0.192612	-3.833
Cdk13	NP_081394	NM_027118	4.9872	1451	0	40	0	20	70	0	0	0.116558	0	0.0515338	0.169194	0	-0.633
Cdk16	NP_035179	NM_011049	39.0901	496	0	0	0	0	0	26.6	0	0	0	0	0	0.124591	-2.502
Cdk5	NP_031694	NM_007668	13.9713	292	0	0	0	0	110	66.6	0	0	0	0	1.32119	0.529879	-4.433
Cdk5rap3	NP_084524	NM_030248	8.6545	503	0	0	0	0	0	40	0	0	0	0	0	0.184747	-2.88
Cdk9	NP_570930	NM_130860	8.78739	372	0	0	0	0	0	56.6	0	0	0	0	0	0.353475	-3.266
Cdkl3	NP_722480	NM_153785	0.471375	595	15	0	0	0	0	0	0.084919	0	0	0	0	0	1.961
Cdkl5	NP_001019795	NM_001024624	6.2641	938	20	0	0	0	0	0	0.0718221	0	0	0	0	0	2.168
Cdkn1b	NP_034005	NM_009875	19.1173	197	5	0	0	0	0	40	0.0854938	0	0	0	0	0.471714	-2.177
Cdkn2aip	NP_765995	NM_172407	5.34847	563	0	0	0	0	60	60	0	0	0	0	0.373764	0.247587	-3.972
Cdr2	NP_031698	NM_007672	25.0956	455	0	0	10	10	0	0	0	0	0.0957268	0.082171	0	0	2.129
Cds2	NP_619592	NM_138651	28.9992	444	0	20	50	0	90	80	0	0.190456	0.490492	0	0.710908	0.418593	-1.357
Cdv3	NP_001127898	NM_001134426	1.84148	235	4	0	0	0	0	0	0.0573354	0	0	0	0	0	0.96
Cdv3	NP_780774	NM_175565	3.7631	236	9	0	0	0	0	0	0.128458	0	0	0	0	0	1.501
Cdv3	NP_787027	NM_175833	2.42907	281	4	0	0	0	0	0	0.0479495	0	0	0	0	0	0.958
Cdv3	NP_001127899	NM_001134427	8.11973	109	0	0	0	10	0	0	0	0	0	0.343007	0	0	1.585
Cecr5	NP_659064	NM_144815	3.92359	419	0	20	0	0	0	0	0	0.20182	0	0	0	0	2.17
Celf1	NP_001231832	NM_001244903	13.917	486	0	0	0	0	51	74.9	0	0	0	0	0.368034	0.358039	-4.025
Celf2	NP_001153764	NM_001160292	0	472	0	0	0	2.8	9	0	0	0	0	0.0221792	0.0668736	0	-1.058
Celf2	NP_034290	NM_010160	9.36584	478	10	0	0	2.8	9	0	0.0704698	0	0	0.0219008	0.0660342	0	-0.08
Celf2	NP_001103698	NM_001110228	2.93174	526	10	0	0	2.8	11	20.9	0.0640391	0	0	0.0199022	0.0733434	0.0923094	-1.27
Celf2	NP_001103702	NM_001110232	0	484	10	0	0	2.8	11	20.9	0.0695962	0	0	0.0216293	0.0797079	0.10032	-1.268
Celf2	NP_001103701	NM_001110231	11.3047	490	10	0	0	2.8	11	20.9	0.068744	0	0	0.0213645	0.0787319	0.0990913	-1.273
Celf2	NP_001103700	NM_001110230	0.000134	520	0	0	0	2.8	11	20.9	0	0	0	0.0201319	0.0741897	0.0933745	-2.257
Celf2	NP_001103699	NM_001110229	1.79572	524	13	0	0	2.8	11	20.9	0.0835685	0	0	0.0199782	0.0736233	0.0926617	-1.09
Celf3	NP_766022	NM_172434	43.1565	465	0	0	0	0	0	20	0	0	0	0	0	0.0999223	-2.203
Celf4	NP_001167545	NM_001174074	14.1535	456	0	0	10	12	0	3.3	0	0	0.0955169	0.0983889	0	0.0168126	1.326
Celf4	NP_001139764	NM_001146292	0	504	0	0	0	12	0	3.3	0	0	0	0.0890185	0	0.0152114	0.825
Celf4	NP_001139765	NM_001146293	6.01187	485	0	0	0	12	0	3.3	0	0	0	0.0925059	0	0.0158073	0.853
Celf4	NP_001139766	NM_001146294	13.0603	495	0	0	0	12	0	3.3	0	0	0	0.0906371	0	0.015488	0.833
Celf4	NP_001139767	NM_001146295	0.675049	163	0	0	0	0	0	3.3	0	0	0	0	0	0.047034	-0.525
Celf4	NP_573458	NM_133195	23.6668	484	0	0	0	12	0	3.3	0	0	0	0.092697	0	0.01584	0.841
Cend1	NP_067291	NM_021316	41.7322	149	0	0	20	0	0	0	0	0	0.58464	0	0	0	2.186
Cenpe	NP_776123	NM_173762	1.21752	2471	0	0	0	50	0	0	0	0	0	0.0756532	0	0	2.995
Cenpj	NP_001014996	NM_001014996	1.63925	1344	0	0	40	0	0	0	0	0	0.12963	0	0	0	2.808
Cenpv	NP_082724	NM_028448	3.47817	252	0	0	0	0	140	90	0	0	0	0	1.94842	0.829712	-4.659
Cep120	NP_848801	NM_178686	20.0096	988	145	25	120	0	0	0	0.494358	0.106987	0.529017	0	0	0	4.726
Cep128	NP_861536	NM_181815	1.16476	1102	25	0	0	0	0	0	0.0764169	0	0	0	0	0	2.403
Cep135	NP_950197	NM_199032	3.54667	1140	435	0	150	0	0	0	1.28533	0	0.573102	0	0	0	5.419
Cep162	NP_955020	NM_199316	4.31649	1403	0	10	0	0	0	0	0	0.0301364	0	0	0	0	1.588
Cep164	NP_001074842	NM_001081373	5.18031	1333	10	0	70	0	0	0	0.0252697	0	0.228725	0	0	0	3.454
Cep170	NP_001093107	NM_001099637	16.744	1578	0	0	0	0	0	40	0	0	0	0	0	0.0588896	-2.879
Cep250	NP_032409	NM_008383	1.83555	2414	143	37	99	0	0	0	0.19954	0.0648057	0.178625	0	0	0	4.697
Cep250	NP_001123472	NM_001130000	4.93181	2435	138	37	99	0	0	0	0.190902	0.0642468	0.177085	0	0	0	4.662
Cep250	NP_001123471	NM_001129999	0.010542	2434	138	37	99	0	0	0	0.190981	0.0642732	0.177158	0	0	0	4.674
Cep290	NP_666121	NM_146009	34.0596	2479	640	1180	640	230	0	0	0.869629	2.01258	1.12447	0.346881	0	0	6.93
Cep350	NP_001034273	NM_001039184	9.63139	3095	30	10	0	0	0	0	0.0326506	0.0136612	0	0	0	0	2.759
Cep57	NP_080941	NM_026665	11.6446	500	25	0	70	0	0	0	0.168423	0	0.60978	0	0	0	3.644
Cep68	NP_758464	NM_172260	6.41585	733	315	0	120	0	0	0	1.44756	0	0.713054	0	0	0	5.121
Cetn2	NP_062278	NM_019405	22.4194	172	70	65	50	0	0	0	1.37088	1.59784	1.26615	0	0	0	4.256
Cetn3	NP_031710	NM_007684	40.2822	167	20	40	30	0	0	0	0.403408	1.01273	0.782438	0	0	0	3.545
Cfdp1	NP_035931	NM_011801	49.2506	295	0	0	0	0	0	40	0	0	0	0	0	0.315009	-2.899
Cfl1	NP_031713	NM_007687	221.366	166	123	170	131	134.9	119	163.3	2.4959	4.33002	3.43723	3.03832	2.51416	2.28541	0.185
Cfl2	NP_031714	NM_007688	15.7124	166	58	0	51	64.9	79	53.3	1.17693	0	1.33816	1.46173	1.66906	0.745941	-0.221
Cftr	NP_066388	NM_021050	0.526492	1476	0	0	0	0	0	10	0	0	0	0	0	0.0157398	-1.545
Cggbp1	NP_848762	NM_178647	18.9802	167	0	0	0	0	40	10	0	0	0	0	0.840035	0.139113	-3.084
Chat	NP_034021	NM_009891	2.68308	645	0	0	0	0	20	10	0	0	0	0	0.108749	0.0360185	-2.616
Chchd10	NP_780538	NM_175329	62.3673	138	0	25	0	0	0	0	0	0.765966	0	0	0	0	2.374
Chchd2	NP_077128	NM_024166	25.4213	153	11	3	8	0	2	0	0.242177	0.0829046	0.227742	0	0.0458451	0	1.696
Chchd3	NP_079612	NM_025336	41.5137	227	105	165	230	60	70	50	1.5581	3.07331	4.41313	0.988224	1.0815	0.511717	1.045
Chchd5	NP_079671	NM_025395	13.183	110	65	35	10	0	0	0	1.99045	1.34532	0.395961	0	0	0	3.751
Chchd6	NP_079627	NM_025351	8.10589	273	40	0	25	0	0	0	0.493547	0	0.398862	0	0	0	3.245
Chchd6	NP_001161208	NM_001167736	1.23549	245	40	0	15	0	0	0	0.549952	0	0.266668	0	0	0	3.109
Chd2	NP_001074814	NM_001081345	12.7034	1827	0	0	0	0	60	60	0	0	0	0	0.115177	0.0762953	-3.96
Chd4	NP_666091	NM_145979	46.6671	1915	0	0	0	0	580	530	0	0	0	0	1.06222	0.642973	-6.275
Chd6	NP_775544	NM_173368	13.5767	2711	0	0	0	0	45	9.1	0	0	0	0	0.0582153	0.00779825	-3.144
Chd7	NP_001074886	NM_001081417	21.1353	2986	45	0	0	0	55	22.5	0.0507637	0	0	0	0.0645992	0.0175056	-0.979
Chd8	NP_963999	NM_201637	18.8868	2582	0	0	0	10	0	9.1	0	0	0	0.0144802	0	0.00818786	-0.236
Chd9	NP_796198	NM_177224	17.207	2869	0	0	0	0	5	9.1	0	0	0	0	0.00611214	0.00736879	-1.817
Cherp	NP_613051	NM_138585	12.8704	938	0	0	0	0	60	60	0	0	0	0	0.224338	0.148605	-4.01
Chid1	NP_001136153	NM_001142681	4.71941	396	0	5	0	0	0	0	0	0.0533855	0	0	0	0	1.08
Chkb	NP_031718	NM_007692	3.10369	394	0	0	0	20	0	0	0	0	0	0.189786	0	0	2.189
Chmp1a	NP_663581	NM_145606	9.18003	196	0	40	30	20	20	0	0	0.862884	0.666669	0.381508	0.357872	0	0.983
Chmp1b	NP_077152	NM_024190	6.56468	199	0	12	0	0	0	0	0	0.254963	0	0	0	0	1.753
Chmp2a	NP_081161	NM_026885	77.2401	222	20	115	40	20	30	0	0.303464	2.19025	0.784788	0.336827	0.473939	0	1.354
Chmp2b	NP_081155	NM_026879	14.6654	213	0	0	0	10	20	10	0	0	0	0.17553	0.32931	0.10907	-1.343
Chmp3	NP_080059	NM_025783	14.5082	224	0	45	0	20	0	0	0	0.849402	0	0.33382	0	0	3.247
Chmp4b	NP_083638	NM_029362	41.5524	224	110	140	20	90	10	20	1.65415	2.64258	0.38889	1.50219	0.156569	0.207428	1.998
Chmp5	NP_084090	NM_029814	36.3098	219	75	0	0	20	0	0	1.15358	0	0	0.341441	0	0	3.615
Chmp6	NP_001078967	NM_001085498	7.48342	200	115	25	10	10	0	10	1.93686	0.528517	0.217779	0.186939	0	0.11616	2.218
Chpf	NP_001001566	NM_001001566	6.29085	774	0	0	15	0	0	0	0	0	0.0844103	0	0	0	1.946
Chpf	NP_001001565	NM_001001565	0.998448	612	0	0	15	0	0	0	0	0	0.106754	0	0	0	1.928
Chrna6	NP_067344	NM_021369	22.0861	494	20	0	0	0	0	0	0.136375	0	0	0	0	0	2.189
Chtop	NP_075704	NM_023215	26.2728	224	0	35	140	0	10	10	0	0.660646	2.72223	0	0.156569	0.103714	1.701
Cic	NP_001103601	NM_001110131	0.016206	1603	0	0	0	0	0	5	0	0	0	0	0	0.00724639	-0.903
Cic	NP_001103602	NM_001110132	5.9077	1604	0	0	0	0	0	5	0	0	0	0	0	0.00724187	-0.92
Cic	NP_082158	NM_027882	7.0898	1604	0	0	0	0	0	10	0	0	0	0	0	0.0144837	-1.561
Cirbp	NP_031731	NM_007705	82.629	172	10	5	20	0	100	80	0.19584	0.122911	0.506462	0	2.03904	1.08056	-2.127
Cisd1	NP_598768	NM_134007	40.9664	108	155	115	70	0	60	80	4.83436	4.50218	2.82306	0	1.94842	1.72088	0.391
Cisd2	NP_080178	NM_025902	16.6866	135	0	70	30	20	70	20	0	2.19237	0.967905	0.553893	1.81852	0.344177	-0.204
Ciz1	NP_082688	NM_028412	9.52556	845	0	0	0	0	12	0	0	0	0	0	0.0498056	0	-1.721
Ciz1	NP_001239463	NM_001252534	2.52706	800	0	0	0	0	12	0	0	0	0	0	0.0526072	0	-1.703
Ciz1	NP_001239467	NM_001252538	4.14473	791	0	0	0	0	12	0	0	0	0	0	0.0532058	0	-1.724
Ciz1	NP_001239465	NM_001252536	0.600947	796	0	0	0	0	12	0	0	0	0	0	0.0528716	0	-1.717
Ckap4	NP_780660	NM_175451	15.4186	575	185	75	140	80	410	440	1.08376	0.551496	1.06049	0.520178	2.50075	1.77775	-1.07
Ckap5	NP_001159461	NM_001165989	29.1363	2032	0	142	65	30	130	220	0	0.29547	0.139327	0.0551985	0.224375	0.251527	-0.886
Ckap5	NP_083713	NM_029437	3.5232	2011	0	137	65	30	130	220	0	0.288043	0.140782	0.0557749	0.226718	0.254153	-0.906
Ckb	NP_067248	NM_021273	400.538	381	870	507	563	1475	545	1200	7.69175	5.62641	6.43619	14.4743	5.01679	7.31714	0.172
Ckmt1	NP_034027	NM_009897	78.1394	418	550	447	333	225	215	360	4.43218	4.52147	3.46987	2.0125	1.80392	2.00084	0.495
Ckmt2	NP_940807	NM_198415	0.011619	419	0	0	113	0	0	0	0	0	1.17465	0	0	0	3.784
Clasp1	NP_083985	NM_029709	26.4876	1460	22	26	16	0	51	0	0.0507575	0.0752955	0.0477323	0	0.12251	0	-0.276
Clasp1	NP_001074745	NM_001081276	10.6835	1536	22	26	16	42.5	51	225	0.0482461	0.07157	0.0453705	0.103449	0.116448	0.340312	-1.456
Clasp1	NP_808216	NM_177548	2.01929	1468	22	26	16	0	51	0	0.0504809	0.0748852	0.0474722	0	0.121842	0	-0.27
Clasp2	NP_001075429	NM_001081960	10.2684	1287	17	24	42	28.9	107	124.2	0.044494	0.0788463	0.14214	0.0839555	0.291581	0.224196	-1.23
Clasp2	NP_083909	NM_029633	29.7742	1286	17	24	42	28.9	107	124.2	0.0445286	0.0789076	0.14225	0.0840208	0.291808	0.224371	-1.23
Clasp2	NP_001107819	NM_001114347	2.94708	1514	0	24	42	28.9	137	124.2	0	0.0670246	0.120828	0.0713677	0.317357	0.190582	-1.507
Clcc1	NP_001171241	NM_001177770	1.30711	544	0	0	0	0	5	5	0	0	0	0	0.0322348	0.0213529	-1.451
Clcc1	NP_001171242	NM_001177771	1.14069	539	0	0	0	0	5	5	0	0	0	0	0.0325338	0.021551	-1.479
Clcn2	NP_034030	NM_009900	2.32483	908	10	0	0	0	0	0	0.0370975	0	0	0	0	0	1.596
Clcn3	NP_776298	NM_173873	1.97004	818	0	0	70	0	0	20	0	0	0.372726	0	0	0.0568018	0.766
Clcn4-2	NP_035464	NM_011334	27.6106	747	0	0	0	0	40	20	0	0	0	0	0.187799	0.0622006	-3.313
Clcn6	NP_036059	NM_011929	9.74681	870	0	40	50	0	0	10	0	0.194397	0.25032	0	0	0.0267034	1.668
Cldn1	NP_057883	NM_016674	1.58258	211	0	30	30	30	0	0	0	0.601156	0.619276	0.53158	0	0	3.569
Clic1	NP_254279	NM_033444	8.51164	241	100	90	125	210	30	50	1.3977	1.57897	2.25911	3.25786	0.436574	0.48199	1.386
Clic4	NP_038913	NM_013885	6.6322	253	0	15	95	30	0	0	0	0.25068	1.63549	0.443333	0	0	3.979
Clic6	NP_766057	NM_172469	1.29592	596	580	430	750	1030	0	0	3.27803	3.0505	5.481	6.46131	0	0	6.965
Clint1	NP_001038985	NM_001045520	13.3959	623	0	0	0	30	30	0	0	0	0	0.180038	0.168884	0	-0.436
Clip1	NP_062739	NM_019765	12.307	1391	0	35	20	10	0	0	0	0.106387	0.062625	0.0268784	0	0	3.252
Clip2	NP_001034251	NM_001039162	1.00414	1012	0	0	0	10	0	10	0	0	0	0.0369445	0	0.0229565	-0.321
Clip2	NP_034120	NM_009990	5.60742	1047	0	0	0	10	0	10	0	0	0	0.0357094	0	0.022189	-0.324
Clip3	NP_001074583	NM_001081114	70.9611	547	20	0	0	0	0	0	0.123161	0	0	0	0	0	2.181
Cln6	NP_001028347	NM_001033175	7.06733	308	0	10	20	0	30	40	0	0.137277	0.282829	0	0.341605	0.301713	-1.28
Clns1a	NP_076160	NM_023671	8.87586	241	0	0	0	10	10	30	0	0	0	0.155136	0.145525	0.289194	-1.633
Clpb	NP_033217	NM_009191	6.69023	677	10	0	0	0	0	0	0.0497556	0	0	0	0	0	1.579
Clpp	NP_059089	NM_017393	15.9719	272	45	105	60	10	70	40	0.557281	1.63218	0.960788	0.137455	0.902575	0.341646	0.196
Clptm1	NP_062623	NM_019649	25.5847	664	25	0	50	0	40	110	0.126824	0	0.32798	0	0.211274	0.384866	-1.168
Clpx	NP_035932	NM_011802	9.72266	634	145	37	30	0	10	10	0.770388	0.246752	0.2061	0	0.0553178	0.0366434	1.895
Clpx	NP_001037854	NM_001044389	0.511836	620	145	37	30	0	0	10	0.787784	0.252324	0.210753	0	0	0.0374709	2.507
Clstn1	NP_075538	NM_023051	178.5	979	55	0	30	0	0	0	0.189239	0	0.13347	0	0	0	3.525
Clstn2	NP_071714	NM_022319	4.1288	966	25	0	0	0	0	0	0.0871753	0	0	0	0	0	2.376
Clta	NP_001073853	NM_001080384	23.2586	218	7	22	22	0	0	27.5	0.108161	0.426692	0.439553	0	0	0.293063	0.111
Clta	NP_001073855	NM_001080386	5.85586	216	7	22	22	0	0	27.5	0.109163	0.430643	0.443623	0	0	0.295777	0.121
Clta	NP_001073854	NM_001080385	49.4766	248	55	22	27	55	45	32.5	0.747036	0.375076	0.474195	0.829165	0.636378	0.304451	0.225
Clta	NP_058040	NM_016760	28.5721	236	55	22	27	55	45	32.5	0.785021	0.394148	0.498307	0.871326	0.668736	0.319931	0.224
Cltb	NP_083146	NM_028870	39.1587	211	0	0	10	20	40	80	0	0	0.206425	0.354387	0.664862	0.880832	-1.825
Cltc	NP_001003908	NM_001003908	77.7657	1675	850	860	880	1050	1530	3070	1.70937	2.17086	2.2883	2.34371	3.20354	4.25803	-0.735
Clu	NP_038520	NM_013492	70.4825	448	0	0	0	220	20	0	0	0	0	1.83601	0.156569	0	1.885
Clvs1	NP_083216	NM_028940	2.25679	354	0	0	0	0	10	10	0	0	0	0	0.099072	0.0656269	-2.17
Clvs2	NP_780657	NM_175448	1.12329	327	0	0	0	0	10	10	0	0	0	0	0.107252	0.0710457	-2.159
Clybl	NP_083832	NM_029556	4.16404	338	110	25	30	0	10	10	1.09624	0.312732	0.386589	0	0.103762	0.0687335	1.638
Cmas	NP_034038	NM_009908	19.2998	432	0	0	0	0	210	170	0	0	0	0	1.70486	0.91422	-5.229
Cmc1	NP_080718	NM_026442	5.73902	106	0	0	30	10	20	10	0	0	1.23271	0.352715	0.661726	0.219169	-0.152
Cmpk1	NP_079923	NM_025647	26.8545	227	95	30	60	90	50	120	1.40971	0.558784	1.15125	1.48234	0.772499	1.22812	-0.017
Cmtm4	NP_705810	NM_153582	5.48802	208	0	0	20	0	0	10	0	0	0.418805	0	0	0.111692	0.256
Cndp2	NP_075638	NM_023149	14.2386	475	0	75	40	180	80	120	0	0.6676	0.366785	1.4168	0.590677	0.586912	-0.107
Cnga1	NP_031749	NM_007723	174.442	684	775	580	320	260	0	0	3.8166	3.58526	2.03769	1.42117	0	0	6.586
Cnga3	NP_034048	NM_009918	3.80523	631	132	35	0	0	0	0	0.704653	0.234524	0	0	0	0	4.186
Cngb1	NP_001182342	NM_001195413	48.0498	1325	1022	1460	780	710	0	80	2.59816	4.65892	2.56403	2.00342	0	0.140268	3.402
Cngb1	NP_663576	NM_145601	71.4258	326	527	0	0	430	0	0	5.44532	0	0	4.93152	0	0	5.899
Cnih4	NP_084407	NM_030131	7.19273	139	0	0	0	0	0	10	0	0	0	0	0	0.167136	-1.555
Cnn1	NP_034052	NM_009922	0.154289	297	40	0	0	0	10	0	0.453664	0	0	0	0.118086	0	0.898
Cnn2	NP_031751	NM_007725	2.48108	305	27	0	0	0	0	0	0.298191	0	0	0	0	0	2.437
Cnn3	NP_082320	NM_028044	44.8482	330	72	10	0	50	30	90	0.734936	0.128125	0	0.566482	0.318832	0.633598	-0.399
Cnnm2	NP_001095941	NM_001102471	2.88854	853	0	2	0	10	0	0	0	0.00991356	0	0.0438309	0	0	1.658
Cnnm3	NP_444416	NM_053186	2.99734	713	12	0	15	15	0	5	0.0566921	0	0.0916319	0.0786559	0	0.0162917	1.537
Cnnm3	NP_001034640	NM_001039551	1.41803	708	7	0	15	15	0	5	0.0333039	0	0.0922791	0.0792114	0	0.0164067	1.43
Cnnm4	NP_291048	NM_033570	7.09506	771	60	40	0	0	0	10	0.262137	0.219358	0	0	0	0.0301322	1.768
Cnot1	NP_694804	NM_153164	8.38668	2326	0	108	36	92.5	46	112.2	0	0.196319	0.0674121	0.148683	0.0693589	0.112065	-0.093
Cnot1	NP_001192155	NM_001205226	2.3983	2369	0	108	36	92.5	46	112.2	0	0.192756	0.0661885	0.145984	0.0681	0.110031	-0.093
Cnot1	NP_835179	NM_178078	20.344	2371	105	108	36	92.5	46	112.2	0.149172	0.192593	0.0661327	0.145861	0.0680425	0.109938	0.27
Cnot10	NP_705813	NM_153585	15.1757	744	0	0	0	40	0	0	0	0	0	0.20101	0	0	2.795
Cnot2	NP_001032935	NM_001037846	17.752	540	0	0	0	0	0	9.9	0	0	0	0	0	0.0425919	-1.543
Cnot2	NP_001032936	NM_001037847	12.6743	550	0	0	0	30	0	9.9	0	0	0	0.203933	0	0.0418175	0.643
Cnot2	NP_082358	NM_028082	2.09334	499	0	0	0	0	0	9.9	0	0	0	0	0	0.0460914	-1.534
Cnot3	NP_666288	NM_146176	16.5658	751	0	65	50	20	0	20	0	0.36595	0.289985	0.099568	0	0.0618693	1.388
Cnot7	NP_035265	NM_011135	28.4086	285	35	0	0	30	0	0	0.41367	0	0	0.393556	0	0	3.261
Cnp	NP_001139790	NM_001146318	0.359376	400	0	20	35	40	55	30	0	0.211407	0.381113	0.373878	0.482233	0.17424	-0.382
Cnp	NP_034053	NM_009923	6.49801	420	0	20	35	40	55	30	0	0.20134	0.362964	0.356074	0.459269	0.165942	-0.38
Cnpy2	NP_064337	NM_019953	31.7257	182	80	80	30	0	60	50	1.48064	1.85852	0.717951	0	1.1562	0.63824	0.054
Cnpy3	NP_082341	NM_028065	16.1219	276	0	15	0	0	10	0	0	0.22979	0	0	0.127071	0	0.01
Cnrip1	NP_084137	NM_029861	33.0647	164	25	110	70	30	110	70	0.513484	2.83594	1.85909	0.683923	2.35236	0.991607	-0.229
Cntfr	NP_001129528	NM_001136056	4.26033	372	0	0	0	20	0	20	0	0	0	0.20101	0	0.124903	-0.405
Cntln	NP_780484	NM_175275	8.40118	1396	60	0	0	0	0	0	0.144776	0	0	0	0	0	3.195
Cntn1	NP_031753	NM_007727	1.26102	1020	165	195	320	210	390	430	0.544897	0.80832	1.36645	0.769749	1.34097	0.979385	-0.418
Cntn4	NP_001103219	NM_001109749	7.62378	1026	0	0	0	0	0	60	0	0	0	0	0	0.135859	-3.302
Cntn5	NP_001028531	NM_001033359	0.503486	893	27	0	0	0	0	0	0.101846	0	0	0	0	0	2.44
Cntn5	NP_001164258	NM_001170787	1.50701	1098	37	0	0	0	0	0	0.113509	0	0	0	0	0	2.719
Cntnap1	NP_058062	NM_016782	5.94865	1385	0	25	0	20	170	110	0	0.0763201	0	0.0539896	0.43048	0.184514	-2.285
Cntnap2	NP_001004357	NM_001004357	4.41435	1332	0	0	0	0	10	0	0	0	0	0	0.0263299	0	-1.563
Cntrob	NP_766148	NM_172560	2.59941	887	215	185	150	0	0	0	0.81648	0.881854	0.736568	0	0	0	5.391
Coa3	NP_080894	NM_026618	29.6237	108	40	65	40	0	0	0	1.24758	2.54471	1.61317	0	0	0	4.017
Coa7	NP_081526	NM_027250	4.38491	231	0	20	0	0	10	0	0	0.366072	0	0	0.151825	0	0.267
Coasy	NP_082172	NM_027896	4.49731	563	0	0	0	0	0	10	0	0	0	0	0	0.0412645	-1.572
Cobra1	NP_067368	NM_021393	8.97216	580	0	0	0	0	0	10	0	0	0	0	0	0.0400551	-1.531
Cog2	NP_084022	NM_029746	6.54315	731	0	0	0	0	0	10	0	0	0	0	0	0.031781	-1.548
Cog7	NP_001028490	NM_001033318	9.68956	770	0	0	0	0	0	20	0	0	0	0	0	0.0603427	-2.192
Coil	NP_057915	NM_016706	4.48179	573	0	0	0	0	20	10	0	0	0	0	0.122414	0.0405444	-2.592
Col18a1	NP_034059	NM_009929	4.87545	1315	0	22	0	0	55	0	0	0.0707368	0	0	0.146687	0	-1.306
Col18a1	NP_001103461	NM_001109991	3.6667	1527	145	22	0	0	55	90	0.31986	0.0609161	0	0	0.126322	0.136927	-0.343
Col1a1	NP_031768	NM_007742	0.296053	1453	0	0	0	0	0	30	0	0	0	0	0	0.0479668	-2.619
Col1a2	NP_031769	NM_007743	1.63248	1372	0	0	0	0	10	70	0	0	0	0	0.0255623	0.11853	-3.619
Col22a1	NP_081450	NM_027174	0.043689	1613	0	0	0	10	0	0	0	0	0	0.023179	0	0	1.622
Col25a1	NP_001231881	NM_001244952	1.32923	645	0	0	0	0	10	0	0	0	0	0	0.0543744	0	-1.536
Col25a1	NP_942004	NM_198711	0.080287	640	0	0	0	0	10	0	0	0	0	0	0.0547992	0	-1.546
Col25a1	NP_084114	NM_029838	0.558511	666	0	0	0	0	10	0	0	0	0	0	0.0526599	0	-1.542
Col27a1	NP_079961	NM_025685	0.733584	1845	45	0	0	50	0	0	0.0821574	0	0	0.101322	0	0	3.619
Col2a1	NP_001106987	NM_001113515	3.94578	1419	132	0	0	0	40	20	0.313345	0	0	0	0.0988625	0.0327441	0.318
Col2a1	NP_112440	NM_031163	5.10974	1487	132	0	0	0	40	20	0.299016	0	0	0	0.0943416	0.0312467	0.317
Col4a2	NP_034062	NM_009932	8.83123	1707	0	0	0	0	70	60	0	0	0	0	0.14382	0.0816588	-4.048
Col4a3bp	NP_001157694	NM_001164222	4.46486	598	10	0	0	0	0	0	0.0563287	0	0	0	0	0	1.624
Col4a3bp	NP_075909	NM_023420	9.05682	624	10	0	0	0	0	0	0.0539817	0	0	0	0	0	1.593
Col4a5	NP_001156627	NM_001163155	2.22604	1691	0	0	20	0	0	10	0	0	0.0515147	0	0	0.0137386	0.272
Col5a3	NP_058615	NM_016919	1.2665	1739	270	0	0	0	0	0	0.522992	0	0	0	0	0	4.656
Col6a1	NP_034063	NM_009933	8.62742	1025	0	25	0	0	70	60	0	0.103125	0	0	0.239513	0.135992	-2.046
Col6a3	NP_001229938	NM_001243009	0.14981	2677	0	0	0	10	55	115	0	0	0	0.0139663	0.0720557	0.099801	-3.096
Col6a3	NP_001229937	NM_001243008	0.047146	3284	0	0	0	10	55	115	0	0	0	0.0113848	0.0587372	0.0813542	-3.078
Col6a6	NP_001096077	NM_001102607	0.020678	2265	35	0	0	0	0	0	0.0520512	0	0	0	0	0	2.685
Col6a6	NP_766515	NM_172927	0.017008	1182	15	0	0	0	0	0	0.0427469	0	0	0	0	0	1.922
Col9a2	NP_031767	NM_007741	3.79022	688	0	0	0	0	0	20	0	0	0	0	0	0.0675347	-2.23
Commd2	NP_780304	NM_175095	4.17646	199	0	0	0	0	10	10	0	0	0	0	0.176239	0.116743	-2.157
Commd3	NP_680087	NM_147778	43.6245	195	0	0	0	0	10	0	0	0	0	0	0.179854	0	-1.574
Comt	NP_031770	NM_007744	2.68721	265	0	0	0	0	0	20	0	0	0	0	0	0.175335	-2.211
Comtd1	NP_081241	NM_026965	1.94589	262	5	0	0	0	0	10	0.0642835	0	0	0	0	0.0886715	-0.822
Copa	NP_034068	NM_009938	48.9603	1224	0	90	90	150	270	550	0	0.310892	0.320263	0.458184	0.773635	1.04392	-1.404
Copb1	NP_203534	NM_033370	25.8505	953	50	55	0	0	80	220	0.176729	0.244016	0	0	0.294409	0.536309	-1.532
Copb2	NP_056642	NM_015827	36.7968	905	0	80	0	80	100	240	0	0.373758	0	0.3305	0.38753	0.616095	-1.24
Cope	NP_067513	NM_021538	43.2802	308	50	5	20	30	40	40	0.546827	0.0686385	0.282829	0.364167	0.455474	0.301713	-0.226
Copg	NP_059505	NM_017477	30.3127	874	0	0	0	0	70	140	0	0	0	0	0.280893	0.372136	-4.576
Copg2	NP_059506	NM_017478	19.5434	871	0	5	0	0	40	120	0	0.0242717	0	0	0.161063	0.320073	-3.541
Cops2	NP_034069	NM_009939	23.9259	443	0	0	0	0	0	180	0	0	0	0	0	0.943961	-4.37
Cops3	NP_036121	NM_011991	39.5304	423	0	15	0	0	30	50	0	0.149934	0	0	0.248734	0.274609	-1.996
Cops4	NP_036131	NM_012001	30.4332	406	90	25	40	100	90	180	0.746702	0.260353	0.42912	0.920882	0.777447	1.02999	-0.554
Cops5	NP_038743	NM_013715	31.6362	334	40	40	0	60	50	50	0.403408	0.506363	0	0.671637	0.525022	0.347783	-0.151
Cops6	NP_036132	NM_012002	39.3838	324	20	0	0	0	30	70	0.207929	0	0	0	0.324736	0.501924	-1.995
Cops7a	NP_001157561	NM_001164089	4.76081	277	0	15	10	5	0	10	0	0.22896	0.157241	0.067487	0	0.0838698	0.564
Cops7a	NP_036133	NM_012003	21.3772	275	0	15	10	5	0	10	0	0.230625	0.158384	0.0679778	0	0.0844798	0.57
Cops8	NP_598566	NM_133805	21.3573	209	10	55	20	50	20	50	0.16117	1.11267	0.416801	0.894445	0.335612	0.555788	0.163
Copz1	NP_062791	NM_019817	30.0865	177	0	10	0	30	20	50	0	0.238878	0	0.633691	0.396288	0.656269	-1.008
Coq3	NP_766275	NM_172687	2.59967	370	40	0	0	0	0	0	0.364157	0	0	0	0	0	2.826
Coq5	NP_080780	NM_026504	8.82446	327	20	0	0	0	0	0	0.206022	0	0	0	0	0	2.165
Coq6	NP_766170	NM_172582	4.75783	476	40	0	0	0	20	0	0.283063	0	0	0	0.147359	0	0.236
Coq7	NP_034070	NM_009940	17.9701	217	0	0	10	0	0	0	0	0	0.200718	0	0	0	1.604
Coq9	NP_080728	NM_026452	9.88527	313	0	7	0	0	0	15	0	0.0945589	0	0	0	0.111335	-0.974
Coro1a	NP_034028	NM_009898	3.44973	461	0	0	0	0	0	10	0	0	0	0	0	0.0503947	-1.562
Coro1b	NP_035908	NM_011778	23.049	484	0	0	70	0	0	0	0	0	0.629938	0	0	0	3.347
Coro1c	NP_035909	NM_011779	17.2333	474	0	0	40	50	60	130	0	0	0.367559	0.394386	0.443943	0.637163	-1.226
Coro7	NP_084481	NM_030205	8.55813	922	0	0	0	0	0	70	0	0	0	0	0	0.176381	-3.463
Cotl1	NP_082347	NM_028071	27.3292	142	40	120	130	150	60	70	0.948861	3.57307	3.98749	3.94941	1.48189	1.14524	0.723
COX1	YP_001686700	NC_010339	notfound	514	0	25	0	0	0	10	0	0.205648	0	0	0	0.0451983	0.468
Cox15	NP_659123	NM_144874	4.58906	413	0	0	0	0	0	10	0	0	0	0	0	0.0562517	-1.568
Cox17	NP_001017429	NM_001017429	37.1978	63	55	20	0	0	10	0	2.94071	1.34226	0	0	0.55669	0	1.48
Cox18	NP_001156928	NM_001163456	2.67922	332	0	0	0	20	0	0	0	0	0	0.225228	0	0	2.199
Cox19	NP_932097	NM_197980	12.856	92	0	0	0	0	0	10	0	0	0	0	0	0.252521	-1.554
COX2	YP_001686701	NC_010339	notfound	227	200	125	180	40	180	180	2.9678	2.32827	3.45376	0.658816	2.781	1.84218	-0.084
Cox4i1	NP_034071	NM_009941	206.081	169	160	265	250	70	180	330	3.18907	6.62991	6.44315	1.54861	3.73542	4.53641	-0.122
Cox4i2	NP_444321	NM_053091	20.2337	172	0	0	10	0	0	0	0	0	0.253231	0	0	0	1.624
Cox5a	NP_031773	NM_007747	66.6359	146	310	255	230	60	190	260	7.1522	7.38475	6.86152	1.53648	4.5641	4.13719	0.142
Cox6a1	NP_031774	NM_007748	353.256	112	35	15	0	0	0	0	1.05264	0.566268	0	0	0	0	2.988
Cox6b1	NP_079904	NM_025628	197.193	86	75	290	220	50	120	50	2.93761	14.2577	11.1422	2.17371	4.89369	1.35069	0.822
Cox6c	NP_444301	NM_053071	304.151	76	85	100	100	50	140	190	3.76735	5.56333	5.73102	2.45972	6.46053	5.80798	-0.486
Cox7a2	NP_034075	NM_009945	89.096	83	65	65	30	10	40	60	2.63795	3.31119	1.5743	0.450455	1.69019	1.67942	0.034
Cox7a2l	NP_033213	NM_009187	83.8344	111	15	17	5	0	10	5	0.455197	0.647552	0.196197	0	0.315959	0.104648	0.445
Cox7a2l	NP_001153001	NM_001159529	4.00589	134	10	17	5	0	10	5	0.251377	0.536405	0.162521	0	0.261727	0.0866863	0.308
Cp	NP_031778	NM_007752	21.0592	1061	122	50	105	140	70	125	0.387325	0.199252	0.431041	0.493336	0.231386	0.273703	0.262
Cp	NP_001036076	NM_001042611	8.50356	1086	122	50	105	140	70	125	0.378408	0.194665	0.421119	0.481979	0.226059	0.267403	0.26
Cpd	NP_031780	NM_007754	4.71743	1377	25	110	130	40	0	0	0.0611557	0.337759	0.411201	0.108607	0	0	4.763
Cpe	NP_038522	NM_013494	205.33	476	60	30	30	50	10	10	0.424595	0.266479	0.274511	0.392729	0.0736796	0.0488066	1.663
Cpeb3	NP_938042	NM_198300	5.55549	716	0	0	0	0	0	30	0	0	0	0	0	0.0973405	-2.617
Cplx2	NP_034076	NM_009946	54.7076	134	0	0	0	40	0	40	0	0	0	1.11605	0	0.693491	-0.454
Cplx3	NP_666335	NM_146223	78.6528	158	5	25	0	0	50	70	0.106597	0.669008	0	0	1.10986	1.02926	-1.831
Cplx4	NP_663468	NM_145493	137.544	160	25	10	20	30	10	0	0.526321	0.264258	0.544446	0.701021	0.219197	0	1.581
Cpne1	NP_733467	NM_170588	2.4436	536	0	5	0	0	0	0	0	0.0394415	0	0	0	0	1.122
Cpne2	NP_705727	NM_153507	1.59607	548	0	0	15	0	0	0	0	0	0.119222	0	0	0	1.941
Cpne3	NP_082045	NM_027769	5.04486	533	0	20	40	90	40	0	0	0.158654	0.326872	0.631314	0.263201	0	0.812
Cpne4	NP_082995	NM_028719	4.64909	557	0	0	40	0	0	0	0	0	0.312788	0	0	0	2.801
Cpne5	NP_694806	NM_153166	3.84961	593	41	0	16	60	18	35	0.232895	0	0.11752	0.378291	0.106456	0.137119	0.305
Cpne6	NP_001139655	NM_001146183	1.3182	556	0	0	6	0	0	15	0	0	0.0470026	0	0	0.0626761	-1.079
Cpne6	NP_034077	NM_009947	5.21562	557	0	0	6	0	0	15	0	0	0.0469182	0	0	0.0625636	-1.09
Cpne7	NP_733785	NM_170684	1.17956	557	0	0	15	0	0	0	0	0	0.117295	0	0	0	1.944
Cpne8	NP_080091	NM_025815	3.84086	577	11	0	6	0	18	25	0.0642166	0	0.0452919	0	0.109408	0.100658	-1.33
Cpne9	NP_733773	NM_170673	3.92695	553	21	0	6	0	13	0	0.127916	0	0.0472576	0	0.0824465	0	0.251
Cpox	NP_031783	NM_007757	5.97299	443	100	0	0	0	0	0	0.760374	0	0	0	0	0	3.68
Cpped1	NP_666179	NM_146067	9.61812	312	20	0	0	0	0	20	0.215927	0	0	0	0	0.148923	-0.404
Cpsf1	NP_444423	NM_053193	7.72694	1441	0	0	0	0	130	130	0	0	0	0	0.316398	0.209587	-4.71
Cpsf1	NP_001157645	NM_001164173	2.40175	1450	0	0	0	0	130	130	0	0	0	0	0.314434	0.208286	-4.698
Cpsf2	NP_058552	NM_016856	9.55856	782	0	0	0	0	0	50	0	0	0	0	0	0.148542	-3.141
Cpsf3	NP_061283	NM_018813	17.6126	684	0	0	0	0	90	60	0	0	0	0	0.461467	0.203789	-4.163
Cpsf3l	NP_082296	NM_028020	8.10337	600	0	0	0	0	20	10	0	0	0	0	0.116905	0.0387199	-2.585
Cpsf4	NP_848671	NM_178576	5.11989	211	0	0	0	0	10	0	0	0	0	0	0.166216	0	-1.568
Cpsf6	NP_001013409	NM_001013391	21.6364	551	0	0	0	0	110	130	0	0	0	0	0.700157	0.548122	-4.632
Cpsf7	NP_758506	NM_172302	12.6674	471	0	0	0	0	75	60	0	0	0	0	0.558463	0.295948	-4.034
Cpsf7	NP_001157744	NM_001164272	8.24834	462	0	0	0	0	75	60	0	0	0	0	0.569342	0.301713	-4.134
Cpt1a	NP_038523	NM_013495	36.8918	773	155	80	0	0	80	190	0.675434	0.437582	0	0	0.362965	0.571031	-0.629
Cpt2	NP_034079	NM_009949	6.72488	658	225	140	110	60	50	180	1.15183	0.899603	0.728135	0.340922	0.266501	0.635524	0.345
Crabp1	NP_038524	NM_013496	37.7865	137	0	95	60	40	60	60	0	2.93192	1.90755	1.09161	1.53598	1.01746	-0.008
Crb1	NP_573502	NM_133239	34.6198	1405	0	35	0	0	0	0	0	0.105327	0	0	0	0	2.672
Crb2	NP_001157038	NM_001163566	6.6809	1282	0	0	30	50	0	0	0	0	0.101924	0.145818	0	0	3.462
Creb1	NP_598589	NM_133828	8.51994	327	0	0	0	0	9	16.5	0	0	0	0	0.096527	0.117225	-2.424
Creb1	NP_001032815	NM_001037726	0.52581	287	0	0	0	0	9	16.5	0	0	0	0	0.10998	0.133563	-2.444
Creb1	NP_034082	NM_009952	4.67375	341	0	0	0	0	9	16.5	0	0	0	0	0.092564	0.112413	-2.436
Creld1	NP_598691	NM_133930	8.12135	420	0	0	0	0	0	10	0	0	0	0	0	0.0553141	-1.56
Crem	NP_001104326	NM_001110856	0.377274	294	0	0	0	0	4	0	0	0	0	0	0.0477163	0	-0.723
Crem	NP_001104320	NM_001110850	1.9e-05	233	0	0	0	0	4	0	0	0	0	0	0.0602085	0	-0.747
Crem	NP_038526	NM_013498	0.845173	245	0	0	0	0	4	0	0	0	0	0	0.0572596	0	-0.719
Crem	NP_001104325	NM_001110855	0.60872	108	0	0	0	0	4	0	0	0	0	0	0.129894	0	-0.714
Crem	NP_001104324	NM_001110854	0.89902	120	0	0	0	0	4	0	0	0	0	0	0.116905	0	-0.709
Crip2	NP_077185	NM_024223	7.18165	208	10	0	0	0	0	0	0.161945	0	0	0	0	0	1.617
Crk	NP_598417	NM_133656	25.847	304	50	30	0	50	0	90	0.554022	0.41725	0	0.614931	0	0.687788	-0.135
Crkl	NP_031790	NM_007764	7.07476	303	0	0	0	0	0	50	0	0	0	0	0	0.383365	-3.128
Crlf3	NP_061246	NM_018776	10.8844	442	0	0	0	10	0	10	0	0	0	0.0845878	0	0.0525609	-0.312
Crmp1	NP_031791	NM_007765	38.9721	572	110	0	133	212.3	273	457.8	0.64778	0	1.01275	1.38766	1.67387	1.85937	-0.968
Crmp1	NP_001129530	NM_001136058	5.0912	686	120	218	133	212.3	293	507.8	0.589234	1.34363	0.844448	1.15706	1.49795	1.7197	-0.658
Crnkl1	NP_080096	NM_025820	8.77143	690	0	0	0	0	60	110	0	0	0	0	0.304969	0.370364	-4.283
Crocc	NP_742120	NM_172122	27.9214	2009	2365	2167	3260	950	220	440	3.96535	4.56066	7.06778	1.76796	0.384058	0.508813	2.085
Crot	NP_076222	NM_023733	15.0582	612	0	0	0	0	20	10	0	0	0	0	0.114613	0.0379607	-2.576
Crtac1	NP_660105	NM_145123	6.02186	646	20	0	0	0	10	0	0.104287	0	0	0	0.0542902	0	0.266
Crtc3	NP_776288	NM_173863	7.10661	619	0	0	0	0	10	0	0	0	0	0	0.0566583	0	-1.536
Crx	NP_001106801	NM_001113330	22.0564	323	0	0	0	0	45	0	0	0	0	0	0.488612	0	-2.994
Crx	NP_031796	NM_007770	344.548	299	0	0	0	0	45	0	0	0	0	0	0.527832	0	-3.029
Cryaa	NP_038529	NM_013501	69.6828	196	35	85	20	230	20	1010	0.60151	1.83363	0.444446	4.38734	0.357872	11.9716	-1.521
Cryab	NP_034094	NM_009964	44.2687	175	0	40	0	130	0	850	0	0.96643	0	2.77738	0	11.2841	-2.096
Cryba1	NP_034095	NM_009965	51.6032	215	0	35	0	150	0	1052.5	0	0.688301	0	2.60845	0	11.3728	-2.228
Cryba2	NP_067516	NM_021541	9.51385	197	0	0	0	10	0	182.5	0	0	0	0.189786	0	2.1522	-3.153
Cryba4	NP_067326	NM_021351	4.94775	196	0	0	0	60	0	370	0	0	0	1.14452	0	4.38562	-2.283
Crybb1	NP_076184	NM_023695	5.93283	250	0	45	0	90	0	942.5	0	0.761064	0	1.34596	0	8.75844	-2.429
Crybb2	NP_031799	NM_007773	22.4136	205	0	25	10	70	0	722.5	0	0.515626	0.212467	1.27666	0	8.18784	-2.424
Crybb3	NP_067327	NM_021352	6.13852	211	0	30	0	170	0	1310	0	0.601156	0	3.01229	0	14.4236	-2.37
Cryga	NP_031800	NM_007774	22.554	174	0	20	0	0	0	409.9	0	0.485992	0	0	0	5.47286	-3.402
Crygb	NP_658906	NM_144761	16.4424	175	0	36	0	30	0	296.3	0	0.869787	0	0.640934	0	3.9335	-1.986
Crygc	NP_001076042	NM_001082573	7.57085	175	0	26	0	5	0	209.8	0	0.62818	0	0.106822	0	2.78518	-2.357
Crygc	NP_031801	NM_007775	3.11856	174	0	31	0	5	0	209.8	0	0.753288	0	0.107436	0	2.80118	-2.231
Crygd	NP_031802	NM_007776	17.1118	174	0	0	0	0	0	356.4	0	0	0	0	0	4.75854	-5.192
Cryge	NP_031803	NM_007777	9.9825	174	0	0	0	0	0	376.4	0	0	0	0	0	5.02557	-5.253
Crygn	NP_694716	NM_153076	1.80473	183	0	0	0	30	0	60	0	0	0	0.612915	0	0.761703	-1.12
Crygs	NP_034097	NM_009967	9.40057	178	0	0	0	20	0	535	0	0	0	0.420088	0	6.98263	-3.682
Crym	NP_057878	NM_016669	57.553	313	275	160	180	210	270	410	2.95951	2.16135	2.5048	2.50845	3.02533	3.04316	-0.306
Cryz	NP_034098	NM_009968	5.01908	331	70	40	30	30	20	60	0.712362	0.510953	0.394765	0.338862	0.211912	0.421123	0.259
Cs	NP_080720	NM_026444	50.3858	464	467	392	335	185	267	350	3.39023	3.57204	3.14465	1.49068	2.01812	1.75241	0.304
Csad	NP_659191	NM_144942	4.41397	493	0	20	0	40	20	0	0	0.171527	0	0.303349	0.142278	0	0.597
Csda	NP_620817	NM_139117	55.0053	361	152	124	224	76.6	30	0	1.4183	1.45232	2.70263	0.793325	0.291453	0	2.434
Csda	NP_035863	NM_011733	87.2813	292	0	42	0	76.6	0	0	0	0.608156	0	0.980789	0	0	3.845
Csdc2	NP_663448	NM_145473	29.3135	154	0	0	0	10	0	0	0	0	0	0.242778	0	0	1.618
Csde1	NP_001155326	NM_001161854	45.1398	767	0	20	0	0	0	20	0	0.110251	0	0	0	0.0605787	-0.41
Csde1	NP_659150	NM_144901	24.3755	798	0	0	0	0	0	20	0	0	0	0	0	0.0582254	-2.231
Cse1l	NP_076054	NM_023565	25.9805	971	25	0	70	0	80	290	0.0867264	0	0.313996	0	0.288951	0.693848	-1.841
Csk	NP_031809	NM_007783	12.6306	450	0	0	0	0	0	20	0	0	0	0	0	0.103253	-2.222
Csl	NP_082221	NM_027945	1.03098	466	0	0	0	0	87	130	0	0	0	0	0.654768	0.648101	-4.666
Csnk1a1	NP_666199	NM_146087	69.5618	325	90	50	70	30	90	50	0.932803	0.650482	0.938123	0.345118	0.97121	0.357414	0.039
Csnk1d	NP_082150	NM_027874	5.35541	409	7	0	5	0	0	0	0.0576508	0	0.0532466	0	0	0	1.661
Csnk1d	NP_620690	NM_139059	12.9608	415	7	5	5	0	40	20	0.0568173	0.0509414	0.0524768	0	0.338038	0.111961	-1.709
Csnk1e	NP_038795	NM_013767	17.3917	416	0	0	0	0	0	10	0	0	0	0	0	0.055846	-1.54
Csnk1g1	NP_775277	NM_173185	13.0685	459	40	0	0	0	0	0	0.293547	0	0	0	0	0	2.825
Csnk1g3	NP_690022	NM_152809	16.101	424	65	0	0	0	0	0	0.516391	0	0	0	0	0	3.292
Csnk2a1	NP_031814	NM_007788	23.8883	391	30	20	80	130	45	110	0.258449	0.216273	0.891166	1.24307	0.403636	0.653584	0.017
Csnk2a2	NP_034104	NM_009974	5.35872	350	0	0	0	30	35	0	0	0	0	0.320467	0.350715	0	-0.581
Csnk2b	NP_034105	NM_009975	49.6698	215	65	25	40	90	20	0	1.01837	0.491643	0.810339	1.56507	0.326246	0	1.869
Cspg4	NP_620570	NM_139001	0.652585	2327	265	260	100	210	0	0	0.383601	0.472417	0.187175	0.337406	0	0	5.785
Cspg5	NP_001159745	NM_001166273	4.48904	566	0	47	65	220	0	15	0	0.351099	0.500198	1.45324	0	0.0615687	2.565
Cspg5	NP_038912	NM_013884	24.7315	539	105	47	55	250	0	15	0.656193	0.368687	0.444446	1.73413	0	0.0646529	2.877
Csrp1	NP_031817	NM_007791	7.28402	193	60	20	30	0	10	0	1.04719	0.438149	0.677032	0	0.181717	0	1.849
Cst3	NP_034106	NM_009976	474.796	140	15	50	30	0	10	0	0.360906	1.51005	0.933337	0	0.250511	0	1.71
Cstb	NP_031819	NM_007793	16.8117	98	0	30	10	0	10	0	0	1.29433	0.444446	0	0.357872	0	0.881
Cstf1	NP_077161	NM_024199	8.83136	431	0	0	0	0	90	70	0	0	0	0	0.732351	0.377317	-4.26
Cstf2	NP_573459	NM_133196	8.91515	580	0	0	0	0	100	65	0	0	0	0	0.604681	0.260358	-4.291
Cstf2t	NP_112539	NM_031249	17.3842	632	0	0	0	0	70	15	0	0	0	0	0.38845	0.0551391	-3.639
Cstf3	NP_663504	NM_145529	8.32559	717	0	0	0	0	100	90	0	0	0	0	0.489142	0.291614	-4.378
Ctage5	NP_001158725	NM_001165253	6.79275	772	0	0	10	20	0	0	0	0	0.0564193	0.0968596	0	0	2.505
Ctbp1	NP_001185789	NM_001198860	3.07407	429	18	16	0	12.5	0	42.5	0.141334	0.157693	0	0.108939	0	0.230153	-0.405
Ctbp1	NP_001185790	NM_001198861	20.641	430	18	16	0	12.5	0	42.5	0.141005	0.157326	0	0.108685	0	0.229618	-0.405
Ctbp1	NP_038530	NM_013502	7.83678	441	18	16	0	12.5	94	42.5	0.137488	0.153402	0	0.105974	0.747555	0.223891	-1.559
Ctbp1	NP_001185788	NM_001198859	1.55647	440	18	16	0	12.5	94	42.5	0.1378	0.15375	0	0.106215	0.749254	0.224399	-1.559
Ctbp2	NP_001164215	NM_001170744	40.0846	988	118	60	100	0	379	540	0.402305	0.256769	0.440847	0	1.34535	1.26976	-1.691
Ctcf	NP_851839	NM_181322	23.8602	736	0	0	0	0	10	30	0	0	0	0	0.0476515	0.0946954	-2.891
Ctdspl2	NP_997615	NM_212450	13.5529	465	0	0	0	0	40	10	0	0	0	0	0.30169	0.0499611	-3.116
Cth	NP_666065	NM_145953	3.78285	398	0	0	0	0	20	20	0	0	0	0	0.176239	0.116743	-2.903
Ctnna1	NP_033948	NM_009818	26.5225	906	0	88	213	163.2	393	359.8	0	0.41068	1.02399	0.673475	1.52131	0.92261	-0.982
Ctnna2	NP_663785	NM_145732	6.20788	905	0	45	173	33.2	68	124.8	0	0.210239	0.832612	0.137157	0.26352	0.32037	-0.23
Ctnna2	NP_033949	NM_009819	5.59921	953	0	45	173	33.2	68	124.8	0	0.19965	0.790676	0.130249	0.250248	0.304234	-0.226
Ctnnb1	NP_001159374	NM_001165902	79.1763	781	160	155	220	300	305	470	0.69008	0.83913	1.22692	1.43615	1.36963	1.39808	-0.424
Ctnnbl1	NP_079956	NM_025680	8.69421	563	0	0	0	0	80	120	0	0	0	0	0.498351	0.495174	-4.475
Ctnnd1	NP_001078917	NM_001085448	4.74038	917	0	0	36	0	0	15	0	0	0.170993	0	0	0.0380021	0.41
Ctnnd1	NP_001078922	NM_001085453	0	911	0	0	36	50	0	15	0	0	0.172119	0.205202	0	0.0382524	1.229
Ctnnd1	NP_031641	NM_007615	6.78131	938	0	0	36	0	170	15	0	0	0.167165	0	0.635624	0.0371513	-2.071
Ctnnd1	NP_001078918	NM_001085449	2.59603	830	0	0	0	0	0	15	0	0	0	0	0	0.0419854	-1.935
Ctnnd2	NP_032755	NM_008729	13.1628	1246	0	0	100	0	126	79.9	0	0	0.349564	0	0.354655	0.148975	-1.192
Ctps	NP_058028	NM_016748	6.41788	591	0	0	0	0	0	20	0	0	0	0	0	0.0786191	-2.235
Ctps2	NP_001162040	NM_001168568	2.56785	586	0	0	0	0	0	5	0	0	0	0	0	0.0198225	-0.928
Ctps2	NP_001162043	NM_001168571	1e-06	535	0	0	0	0	0	5	0	0	0	0	0	0.0217121	-0.912
Ctr9	NP_033457	NM_009431	25.679	1173	0	0	0	0	20	50	0	0	0	0	0.0597979	0.0990279	-3.403
Ctsa	NP_001033581	NM_001038492	0.003955	474	0	0	0	0	20	5	0	0	0	0	0.147981	0.0245063	-2.389
Ctsa	NP_032932	NM_008906	14.3064	492	0	0	0	0	20	5	0	0	0	0	0.142567	0.0236097	-2.393
Ctsb	NP_031824	NM_007798	39.224	339	0	0	0	80	30	60	0	0	0	0.882308	0.310367	0.411185	-0.579
Ctsc	NP_034112	NM_009982	7.90854	462	0	10	0	0	50	0	0	0.091518	0	0	0.379561	0	-1.889
Ctsd	NP_034113	NM_009983	105.645	410	75	132	60	110	90	145	0.616181	1.36125	0.637401	1.00309	0.769862	0.821617	-0.025
Ctsh	NP_031827	NM_007801	4.76541	333	0	0	0	0	10	0	0	0	0	0	0.10532	0	-1.548
Ctsz	NP_071720	NM_022325	12.8851	306	0	0	0	0	0	10	0	0	0	0	0	0.0759214	-1.555
Cttn	NP_001239501	NM_001252572	8.36783	509	0	0	40	35	68	68.3	0	0	0.342285	0.257087	0.468538	0.311737	-1.072
Cttn	NP_031829	NM_007803	9.47138	546	0	0	40	35	68	68.3	0	0	0.319089	0.239665	0.436788	0.290612	-1.077
Cul1	NP_036172	NM_012042	32.5727	776	0	0	30	0	50	80	0	0	0.168385	0	0.225976	0.239504	-1.874
Cul2	NP_083678	NM_029402	9.41759	745	0	0	0	0	10	90	0	0	0	0	0.0470758	0.280654	-3.781
Cul3	NP_057925	NM_016716	85.506	768	0	95	70	80	60	230	0	0.523011	0.396992	0.389456	0.273996	0.695748	-0.661
Cul4a	NP_666319	NM_146207	32.1086	759	0	0	20	5	40	90	0	0	0.114771	0.0246296	0.18483	0.275477	-2.082
Cul4b	NP_082564	NM_028288	9.4897	970	0	0	0	5	0	0	0	0	0	0.0192721	0	0	1.121
Cul5	NP_082083	NM_027807	18.3783	855	0	0	0	55	25	140	0	0	0	0.240506	0.102548	0.380406	-1.544
Cul5	NP_001155090	NM_001161618	1.10543	828	0	0	0	55	25	140	0	0	0	0.248349	0.105892	0.39281	-1.548
Cul7	NP_079887	NM_025611	6.93516	1689	35	0	0	0	0	0	0.0698022	0	0	0	0	0	2.67
Cux1	NP_941004	NM_198602	19.2401	676	0	0	100	0	0	0	0	0	0.644315	0	0	0	3.67
Cux1	NP_034116	NM_009986	5.90037	1426	55	0	0	0	0	0	0.129919	0	0	0	0	0	3.102
Cwc15	NP_075642	NM_023153	44.2552	229	0	0	0	0	60	50	0	0	0	0	0.918903	0.507247	-3.946
Cwc22	NP_085037	NM_030560	5.22748	908	0	0	0	0	20	0	0	0	0	0	0.0772499	0	-2.231
Cwc22	NP_766255	NM_172667	3.95193	902	0	0	0	0	20	0	0	0	0	0	0.0777638	0	-2.211
Cwc27	NP_080348	NM_026072	8.9314	469	0	0	0	0	0	10	0	0	0	0	0	0.049535	-1.568
Cxadr	NP_034118	NM_009988	2.17121	352	0	0	15	0	0	0	0	0	0.185607	0	0	0	1.923
Cxadr	NP_001020363	NM_001025192	10.0716	365	65	50	15	110	70	70	0.599862	0.579196	0.178996	1.12676	0.672604	0.445544	0.04
Cyb5	NP_080073	NM_025797	16.7841	134	0	0	10	10	30	0	0	0	0.325043	0.279013	0.785182	0	-0.846
Cyb5b	NP_079834	NM_025558	18.2061	146	20	5	0	10	40	60	0.461432	0.144799	0	0.256081	0.960862	0.954737	-1.521
Cyb5r1	NP_082333	NM_028057	5.94857	305	45	0	0	10	10	0	0.496985	0	0	0.122583	0.114988	0	1.184
Cyb5r3	NP_084063	NM_029787	14.3832	301	55	40	0	80	80	170	0.615498	0.561878	0	0.993695	0.932132	1.3121	-0.85
Cyc1	NP_079843	NM_025567	36.1936	325	190	170	210	70	140	280	1.96925	2.21164	2.81437	0.805275	1.51077	2.00152	-0.078
Cycs	NP_031834	NM_007808	19.324	105	115	195	100	190	130	190	3.68926	7.85225	4.14816	6.76541	4.34218	4.20387	0.132
Cyct	NP_034119	NM_009989	0.073027	105	0	75	0	0	0	0	0	3.0201	0	0	0	0	3.395
Cyfip1	NP_001158134	NM_001164662	2.87604	1251	0	14	0	0	0	0	0	0.0473172	0	0	0	0	1.866
Cyfip1	NP_035500	NM_011370	2.55918	1253	0	42	80	90	105	190	0	0.141725	0.278089	0.268548	0.293895	0.35228	-0.827
Cyfip2	NP_598530	NM_133769	31.887	1253	0	62	0	80	75	210	0	0.209213	0	0.238709	0.209925	0.389362	-1.189
Cygb	NP_084482	NM_030206	18.2703	190	0	0	10	0	30	50	0	0	0.229241	0	0.55376	0.611367	-2.332
Cyp20a1	NP_084289	NM_030013	5.10527	462	0	0	0	0	0	10	0	0	0	0	0	0.0502856	-1.55
Cyp2s1	NP_083051	NM_028775	1.16043	501	0	0	0	0	0	10	0	0	0	0	0	0.0463711	-1.524
Cyp51	NP_064394	NM_020010	8.83125	503	0	0	0	0	30	0	0	0	0	0	0.209174	0	-2.633
Cyth1	NP_035310	NM_011180	5.46105	398	0	0	1	0	0	0	0	0	0.0109436	0	0	0	0.372
Cyth1	NP_001106169	NM_001112699	3.51502	397	0	0	1	0	0	0	0	0	0.0109712	0	0	0	0.366
Cyth1	NP_001106170	NM_001112700	4.02761	400	0	0	1	0	15	0	0	0	0.0108889	0	0.131518	0	-1.937
Cyth2	NP_035311	NM_011181	14.8752	400	0	0	1	0	0	10	0	0	0.0108889	0	0	0.0580798	-1.575
Cyth2	NP_001106171	NM_001112701	2.44735	399	0	0	1	0	15	10	0	0	0.0109162	0	0.131848	0.0582254	-2.402
Cyth3	NP_035312	NM_011182	7.40231	399	0	0	1	0	30	0	0	0	0.0109162	0	0.263695	0	-2.617
Cyth3	NP_001157020	NM_001163548	0.29333	351	0	0	1	0	0	0	0	0	0.012409	0	0	0	0.374
D030016E14Rik	NP_796214	NM_177240	13.0397	1133	0	0	0	20	0	70	0	0	0	0.0659979	0	0.143534	-1.635
D10Wsu52e	NP_663397	NM_145422	26.1181	505	0	40	0	30	100	210	0	0.334902	0	0.222106	0.694485	0.96608	-1.969
D14Abb1e	NP_001108351	NM_001114879	0.854339	1640	0	0	0	0	10	30	0	0	0	0	0.021385	0.0424974	-2.876
D14Abb1e	NP_083221	NM_028945	12.7834	1498	0	0	0	0	10	0	0	0	0	0	0.0234122	0	-1.563
D15Ertd621e	NP_666071	NM_145959	10.6364	837	0	0	0	0	10	0	0	0	0	0	0.0419014	0	-1.554
D17Wsu104e	NP_543027	NM_080837	15.3155	166	45	35	0	10	30	10	0.913135	0.891474	0	0.225228	0.633822	0.139951	0.336
D19Wsu162e	NP_001171284	NM_001177813	1.48535	348	0	0	30	0	0	0	0	0	0.37548	0	0	0	2.565
D1Pas1	NP_149068	NM_033077	0	660	22	44	0	0	0	0	0.112282	0.281876	0	0	0	0	3.25
D3Bwg0562e	NP_808332	NM_177664	8.68902	766	30	0	0	0	30	10	0.131924	0	0	0	0.137356	0.0303289	-0.691
D630037F22Rik	NP_001028557	NM_001033385	4.61174	1296	0	0	0	10	0	0	0	0	0	0.0288486	0	0	1.597
D630045J12Rik	NP_918950	NM_194061	9.73485	1940	305	130	40	20	0	0	0.529577	0.283329	0.0898056	0.0385441	0	0	5.231
Daam1	NP_080378	NM_026102	2.93797	1077	0	0	40	30	0	30	0	0	0.161767	0.104144	0	0.0647129	0.359
Dab1	NP_796233	NM_177259	9.20735	555	20	0	30	0	0	0	0.121386	0	0.235436	0	0	0	2.999
Dab1	NP_034144	NM_010014	1.92491	217	20	0	10	0	0	0	0.310457	0	0.200718	0	0	0	2.502
Dab2ip	NP_001107596	NM_001114124	3.0786	1189	0	0	16	0	10	23.1	0	0	0.0586116	0	0.0294966	0.0451352	-1.059
Dab2ip	NP_001107597	NM_001114125	7.67289	1132	0	0	16	0	10	23.1	0	0	0.0615628	0	0.0309819	0.0474079	-1.061
Dab2ip	NP_001001602	NM_001001602	4.39656	1124	0	0	6	0	10	23.1	0	0	0.0232504	0	0.0312024	0.0477453	-1.817
Dad1	NP_034145	NM_010015	0.53708	113	55	55	40	10	80	40	1.63951	2.05794	1.5418	0.330865	2.48294	0.822369	-0.212
Dak	NP_663471	NM_145496	5.12207	578	0	0	0	0	0	40	0	0	0	0	0	0.160775	-2.905
Dapk1	NP_083929	NM_029653	5.99709	1430	0	0	0	0	20	0	0	0	0	0	0.049051	0	-2.222
Dapl1	NP_083999	NM_029723	95.0875	107	0	0	0	0	10	0	0	0	0	0	0.327771	0	-1.553
Dars	NP_803228	NM_177445	20.5358	501	250	70	80	160	150	270	1.68087	0.590757	0.6955	1.19402	1.05004	1.25202	-0.213
Dazap1	NP_573451	NM_133188	9.53925	405	0	0	0	0	16	9.9	0	0	0	0	0.138554	0.0567892	-2.443
Dazap1	NP_001116076	NM_001122604	3.35629	406	0	0	0	0	16	9.9	0	0	0	0	0.138213	0.0566493	-2.451
Dazap1	NP_001116077	NM_001122605	1.48148	406	0	0	0	0	16	9.9	0	0	0	0	0.138213	0.0566493	-2.451
Dbi	NP_031856	NM_007830	166.786	87	55	75	80	220	80	250	2.12948	3.64494	4.00512	9.45438	3.22496	6.67584	-0.234
Dbn1	NP_062787	NM_019813	16.6854	660	0	0	23	6.6	26	59.5	0	0	0.151785	0.0373878	0.13816	0.209439	-1.501
Dbn1	NP_001170843	NM_001177372	5.83193	661	0	0	23	6.6	26	59.5	0	0	0.151555	0.0373312	0.137951	0.209123	-1.502
Dbn1	NP_001170842	NM_001177371	1.60231	706	0	0	23	6.6	26	59.5	0	0	0.141895	0.0349518	0.129158	0.195793	-1.5
Dbnl	NP_038838	NM_013810	4.35454	433	0	0	13	0	0	36.3	0	0	0.130768	0	0	0.194762	-1.352
Dbnl	NP_001139781	NM_001146309	6.25684	432	0	0	13	0	0	36.3	0	0	0.13107	0	0	0.195213	-1.346
Dbnl	NP_001139780	NM_001146308	1.33711	436	0	0	13	0	0	36.3	0	0	0.129868	0	0	0.193422	-1.36
Dbr1	NP_113580	NM_031403	4.95345	550	0	0	0	0	0	10	0	0	0	0	0	0.0422399	-1.541
Dbt	NP_034152	NM_010022	3.89555	482	70	0	0	0	0	10	0.489195	0	0	0	0	0.048199	1.429
Dcaf7	NP_082222	NM_027946	53.6621	342	0	0	0	0	20	0	0	0	0	0	0.205096	0	-2.217
Dcaf8	NP_705783	NM_153555	30.3998	591	0	30	0	20	30	20	0	0.214626	0	0.126524	0.178028	0.0786191	-0.457
Dcakd	NP_080827	NM_026551	33.7186	231	0	50	60	0	90	50	0	0.91518	1.13132	0	1.36642	0.502856	-0.727
Dcbld2	NP_082799	NM_028523	6.04859	769	0	0	20	0	0	0	0	0	0.113279	0	0	0	2.169
Dcc	NP_031857	NM_007831	3.50588	1447	0	0	0	0	30	0	0	0	0	0	0.0727121	0	-2.623
Dchs1	NP_001156415	NM_001162943	2.22883	3291	0	0	0	0	30	0	0	0	0	0	0.0319704	0	-2.611
Dclk1	NP_001182467	NM_001195538	3.98039	740	0	11	35	0	47	45	0	0.0628506	0.206007	0	0.222751	0.141275	-1.153
Dclk1	NP_064362	NM_019978	1.98935	756	0	11	35	0	47	45	0	0.0615205	0.201647	0	0.218037	0.138285	-1.155
Dclk1	NP_001104523	NM_001111053	2.26706	363	0	6	0	0	32	0	0	0.0698865	0	0	0.30917	0	-1.838
Dclk2	NP_001182428	NM_001195499	0.874717	714	0	0	3	0	11	6.5	0	0	0.0183007	0	0.0540317	0.0211495	-1.612
Dclk2	NP_001182427	NM_001195498	2.56585	715	0	0	3	0	11	6.5	0	0	0.0182751	0	0.0539561	0.0211199	-1.597
Dclk2	NP_001182426	NM_001195497	1.76261	755	0	0	3	0	11	6.5	0	0	0.0173069	0	0.0510975	0.020001	-1.608
Dclk2	NP_081815	NM_027539	3.22848	756	0	0	3	0	11	6.5	0	0	0.017284	0	0.0510299	0.0199745	-1.609
Dclk2	NP_001182425	NM_001195496	1.32398	771	0	0	3	0	11	6.5	0	0	0.0169477	0	0.0500371	0.0195859	-1.595
Dclk2	NP_001182429	NM_001195500	0	591	0	0	1	0	7	6.5	0	0	0.00736983	0	0.0415398	0.0255512	-1.769
Dcps	NP_081306	NM_027030	15.1363	338	0	0	0	0	0	70	0	0	0	0	0	0.481135	-3.44
Dct	NP_034154	NM_010024	25.9837	517	0	0	0	40	0	170	0	0	0	0.289267	0	0.763913	-1.887
Dctn1	NP_031861	NM_007835	4.00629	1281	69	32	42	97.5	47	154.1	0.181439	0.105621	0.142806	0.284567	0.128678	0.279472	-0.32
Dctn1	NP_001185795	NM_001198866	66.0451	1264	69	32	42	97.5	47	154.1	0.183879	0.107041	0.144726	0.288395	0.130408	0.283231	-0.323
Dctn1	NP_001185796	NM_001198867	29.1911	1239	84	37	42	102.5	52	169.1	0.22837	0.126264	0.147646	0.309302	0.147193	0.317072	-0.314
Dctn2	NP_081427	NM_027151	4.56745	402	39	37	29	69.4	42	69.4	0.32679	0.389157	0.314208	0.645451	0.366418	0.401069	-0.05
Dctn2	NP_001177382	NM_001190453	38.9436	404	39	37	29	69.4	42	69.4	0.325173	0.38723	0.312652	0.642256	0.364604	0.399083	-0.045
Dctn2	NP_001177383	NM_001190454	0.159051	407	39	37	29	69.4	42	69.4	0.322776	0.384376	0.310348	0.637522	0.361917	0.396142	-0.047
Dctn3	NP_001153037	NM_001159565	6.71488	159	17	0	0	20	0	0	0.360149	0	0	0.470287	0	0	2.725
Dctn3	NP_058586	NM_016890	22.9952	186	17	85	60	20	70	50	0.30787	1.93221	1.40502	0.402019	1.31989	0.624514	-0.081
Dctn4	NP_080578	NM_026302	18.6639	460	0	15	50	40	50	110	0	0.137874	0.473432	0.325111	0.381212	0.555546	-0.913
Dda1	NP_079876	NM_025600	15.6988	102	0	0	0	0	0	10	0	0	0	0	0	0.227764	-1.52
Ddah1	NP_081269	NM_026993	23.8562	285	55	60	70	100	90	90	0.650053	0.890133	1.06979	1.31185	1.10752	0.73364	-0.04
Ddah2	NP_001177378	NM_001190449	8.87927	285	205	155	220	170	160	300	2.42292	2.29951	3.3622	2.23015	1.96892	2.44547	-0.009
Ddb1	NP_056550	NM_015735	141.793	1140	80	165	160	330	370	670	0.236383	0.611967	0.611308	1.08228	1.13828	1.36539	-0.846
Ddhd1	NP_001034195	NM_001039106	8.78743	856	0	0	0	0	3	9.9	0	0	0	0	0.0122914	0.0268687	-1.723
Ddhd1	NP_789815	NM_176845	0.000105	884	0	0	0	0	3	9.9	0	0	0	0	0.0119021	0.0260177	-1.696
Ddhd1	NP_001036184	NM_001042719	16.9904	918	0	0	0	0	3	9.9	0	0	0	0	0.0114613	0.025054	-1.735
Ddi2	NP_001017966	NM_001017966	11.2403	399	5	0	0	0	0	30	0.0422112	0	0	0	0	0.174676	-1.886
Ddost	NP_031864	NM_007838	19.9477	441	130	35	50	10	180	110	0.992969	0.335566	0.493829	0.0847796	1.43149	0.579481	-0.752
Ddr1	NP_031610	NM_007584	0.0009	911	0	0	0	5	0	5	0	0	0	0.0205202	0	0.0127508	-0.178
Ddr1	NP_766550	NM_172962	4.37847	874	0	0	0	5	0	5	0	0	0	0.0213889	0	0.0132906	-0.177
Ddt	NP_034157	NM_010027	25.4875	118	75	135	90	210	60	100	2.14097	4.83727	3.32205	6.65376	1.7833	1.96881	0.663
Ddx1	NP_598801	NM_134040	56.5352	740	75	35	20	50	180	340	0.341397	0.199979	0.117718	0.25262	0.85309	1.06741	-1.56
Ddx17	NP_951061	NM_199079	58.4234	407	0	14	0	0	0	0	0	0.145439	0	0	0	0	1.88
Ddx17	NP_001035277	NM_001040187	27.9342	650	0	14	0	0	497	417.2	0	0.0910675	0	0	2.68162	1.49113	-4.44
Ddx17	NP_951062	NM_199080	4.9e-05	652	0	14	0	0	497	417.2	0	0.0907881	0	0	2.67339	1.48656	-4.59
Ddx18	NP_080136	NM_025860	8.24982	660	0	0	70	0	0	10	0	0	0.461955	0	0	0.0351999	1.425
Ddx19a	NP_031942	NM_007916	16.5436	478	0	0	2	2.5	40	160	0	0	0.0182241	0.0195543	0.293485	0.777638	-3.988
Ddx19b	NP_758488	NM_172284	7.09636	479	0	0	2	2.5	0	0	0	0	0.0181861	0.0195135	0	0	0.881
Ddx19b	NP_001177715	NM_001190786	0.00115	494	0	0	2	2.5	0	0	0	0	0.0176339	0.0189209	0	0	0.927
Ddx19b	NP_001177729	NM_001190800	0.06946	467	0	0	2	2.5	0	0	0	0	0.0186534	0.0200149	0	0	0.87
Ddx20	NP_059093	NM_017397	5.16672	825	0	25	10	0	0	0	0	0.128125	0.0527948	0	0	0	2.639
Ddx21	NP_062426	NM_019553	9.46819	851	212	90	80	10	160	200	0.839145	0.447159	0.409454	0.0439339	0.659393	0.545991	-0.417
Ddx23	NP_001074450	NM_001080981	21.4162	819	0	30	110	0	260	240	0	0.154877	0.584997	0	1.11338	0.680789	-1.764
Ddx24	NP_001152974	NM_001159502	0.84302	903	0	0	10	0	0	0	0	0	0.0482345	0	0	0	1.59
Ddx24	NP_065240	NM_020494	22.0503	857	0	0	10	0	0	0	0	0	0.0508235	0	0	0	1.579
Ddx39	NP_932099	NM_197982	5.28396	427	32	0	20	0	190	220	0.252437	0	0.204008	0	1.56056	1.19696	-2.544
Ddx39b	NP_001239386	NM_001252457	36.8766	428	37	0	0	0	400	450	0.291198	0	0	0	3.27771	2.44261	-3.548
Ddx3x	NP_034158	NM_010028	75.5829	662	255	49	140	150	560	500	1.29752	0.312958	0.921118	0.847155	2.96677	1.75468	-1.076
Ddx3y	NP_036138	NM_012008	11.6899	658	0	54	0	0	0	0	0	0.34699	0	0	0	0	3.067
Ddx41	NP_598820	NM_134059	9.09661	622	0	0	0	0	50	20	0	0	0	0	0.281925	0.0747008	-3.418
Ddx42	NP_082350	NM_028074	21.8827	929	0	0	0	0	100	240	0	0	0	0	0.377519	0.600179	-5.04
Ddx46	NP_666087	NM_145975	20.2541	1031	0	0	0	0	280	270	0	0	0	0	0.952475	0.608402	-5.449
Ddx47	NP_080636	NM_026360	14.0907	455	0	0	0	0	30	0	0	0	0	0	0.23124	0	-2.619
Ddx5	NP_031866	NM_007840	347.056	615	302	37	125	50	832	752.2	1.6541	0.254375	0.885279	0.303966	4.74463	2.84147	-1.631
Ddx50	NP_444413	NM_053183	20.8814	734	42	0	40	0	30	0	0.192745	0	0.237361	0	0.143344	0	0.507
Ddx6	NP_031867	NM_007841	14.2218	483	0	0	0	0	70	110	0	0	0	0	0.508282	0.529092	-4.44
Decr1	NP_080448	NM_026172	4.46873	335	0	25	20	40	20	50	0	0.315532	0.260034	0.446421	0.209382	0.346745	-0.294
Degs1	NP_031879	NM_007853	16.6104	323	0	0	0	0	0	10	0	0	0	0	0	0.0719255	-1.537
Dek	NP_080176	NM_025900	28.3359	380	0	0	0	0	170	180	0	0	0	0	1.56899	1.10046	-5.077
Dennd1a	NP_666234	NM_146122	16.0373	1016	0	0	10	0	0	0	0	0	0.0428698	0	0	0	1.603
Depdc1a	NP_083799	NM_029523	0.025485	804	0	0	0	0	20	0	0	0	0	0	0.0872425	0	-2.2
Derl1	NP_077169	NM_024207	9.25605	251	50	0	0	0	0	10	0.671007	0	0	0	0	0.0925575	1.111
Des	NP_034173	NM_010043	0.37352	469	0	0	0	0	167	82.5	0	0	0	0	1.24881	0.408664	-4.701
Desi1	NP_598856	NM_134095	40.587	168	0	25	0	0	0	0	0	0.629186	0	0	0	0	2.376
Dgke	NP_062378	NM_019505	28.1727	564	10	0	0	0	70	60	0.0597244	0	0	0	0.435284	0.247148	-2.83
Dgkz	NP_612179	NM_138306	7.91632	929	0	0	0	0	0	10	0	0	0	0	0	0.0250075	-1.557
Dguok	NP_001155993	NM_001162521	0.154835	236	10	30	0	0	0	5	0.142731	0.537475	0	0	0	0.0492202	1.502
Dguok	NP_038792	NM_013764	7.90096	277	10	30	0	0	0	5	0.121605	0.457921	0	0	0	0.0419349	1.518
Dhcr7	NP_031882	NM_007856	9.12364	471	0	0	0	0	20	30	0	0	0	0	0.148923	0.147974	-3.091
Dhdh	NP_082179	NM_027903	21.9439	333	0	10	0	80	0	30	0	0.126971	0	0.898205	0	0.209297	0.597
Dhh	NP_031883	NM_007857	1.58722	396	0	10	0	10	10	0	0	0.106771	0	0.0944136	0.0885643	0	0.221
Dhodh	NP_064430	NM_020046	2.83871	395	25	0	20	0	10	10	0.213193	0	0.220535	0	0.0887885	0.058815	0.371
Dhrs1	NP_081095	NM_026819	10.3578	313	0	0	20	10	100	60	0	0	0.278311	0.11945	1.12049	0.445341	-2.111
Dhrs13	NP_899109	NM_183286	4.99596	376	0	0	0	0	50	10	0	0	0	0	0.466376	0.0617871	-3.254
Dhrs4	NP_001033027	NM_001037938	2.83006	279	65	35	40	20	40	0	0.784766	0.530411	0.624455	0.268013	0.502817	0	0.87
Dhrs7	NP_079798	NM_025522	8.94487	338	0	0	0	0	80	0	0	0	0	0	0.830094	0	-3.586
Dhrs7b	NP_001165583	NM_001172112	1.78164	314	0	0	0	5	0	0	0	0	0	0.0595347	0	0	1.105
Dhrs7b	NP_663403	NM_145428	4.80231	323	0	0	0	5	0	0	0	0	0	0.0578758	0	0	1.087
Dhx15	NP_001036085	NM_001042620	1.44077	703	0	0	0	0	253	0	0	0	0	0	1.26217	0	-4.797
Dhx15	NP_031865	NM_007839	41.8331	795	0	25	0	0	258	650	0	0.13296	0	0	1.13817	1.89947	-3.99
Dhx16	NP_081263	NM_026987	8.30531	1044	0	0	0	0	90	80	0	0	0	0	0.30234	0.178022	-4.255
Dhx29	NP_766182	NM_172594	7.99002	1365	20	50	0	50	30	0	0.0493547	0.154877	0	0.136952	0.0770802	0	0.879
Dhx30	NP_579925	NM_133347	8.48522	1217	0	0	71	105.7	36	36.3	0	0	0.254105	0.324724	0.103745	0.0692949	0.409
Dhx30	NP_001239611	NM_001252682	7.5774	1194	0	240	71	105.7	36	36.3	0	0.849876	0.259	0.330979	0.105743	0.0706297	1.259
Dhx30	NP_001239612	NM_001252683	1.3479	1223	0	0	66	105.7	36	36.3	0	0	0.235051	0.323131	0.103236	0.068955	0.381
Dhx35	NP_665685	NM_145742	4.53661	679	0	0	0	0	20	10	0	0	0	0	0.103303	0.0342149	-2.573
Dhx36	NP_082412	NM_028136	19.0153	1001	0	35	80	10	70	70	0	0.147837	0.348098	0.0373504	0.245255	0.162461	-0.605
Dhx8	NP_659080	NM_144831	10.2804	1244	0	0	0	0	53	20	0	0	0	0	0.14942	0.0373504	-3.459
Dhx9	NP_031868	NM_007842	46.5284	1383	160	220	370	300	1510	1660	0.389698	0.672588	1.16526	0.811015	3.82921	2.7885	-1.606
Diablo	NP_075721	NM_023232	9.8456	237	0	25	0	0	0	0	0	0.446006	0	0	0	0	2.375
Dido1	NP_780760	NM_175551	7.45795	2256	0	0	0	0	180	35	0	0	0	0	0.279826	0.0360425	-4.59
Dido1	NP_808520	NM_177852	2.38133	1183	0	0	0	0	0	35	0	0	0	0	0	0.0687335	-2.757
Dip2a	NP_001074888	NM_001081419	4.3866	1562	0	0	0	10	15	30	0	0	0	0.0239358	0.0336794	0.0446196	-1.754
Dip2b	NP_001152833	NM_001159361	6.73222	1574	0	82	30	155	0	205	0	0.220271	0.083016	0.368177	0	0.302576	-0.236
Dip2b	NP_766407	NM_172819	0.788232	1340	0	22	0	0	35	0	0	0.0694171	0	0	0.0916046	0	-0.864
Dip2c	NP_001074895	NM_001081426	7.04052	1556	0	0	0	15	0	55	0	0	0	0.0360422	0	0.082118	-1.648
Diras1	NP_660252	NM_145217	8.88956	198	0	0	0	0	40	0	0	0	0	0	0.708515	0	-2.873
Diras2	NP_001019645	NM_001024474	27.5998	199	5	5	10	0	20	20	0.0846346	0.106235	0.218873	0	0.352477	0.233487	-1.147
Dis3	NP_082591	NM_028315	6.1155	958	0	0	0	0	10	150	0	0	0	0	0.0366091	0.363757	-4.258
Dis3l	NP_766107	NM_172519	4.22983	970	0	0	0	0	10	0	0	0	0	0	0.0361562	0	-1.553
Dis3l2	NP_001165628	NM_001172157	7.65153	884	0	0	0	10	0	0	0	0	0	0.0422939	0	0	1.609
Dis3l2	NP_705758	NM_153530	3.75447	870	0	0	0	10	0	0	0	0	0	0.0429745	0	0	1.594
Dkc1	NP_001025478	NM_001030307	8.63462	509	0	55	40	0	120	80	0	0.456871	0.342285	0	0.826832	0.365138	-1.22
Dkk3	NP_056629	NM_015814	80.897	349	15	10	0	20	0	30	0.144776	0.12115	0	0.214257	0	0.199701	-0.098
Dlat	NP_663589	NM_145614	9.30096	642	335	275	300	150	190	250	1.75768	1.81112	2.03531	0.873546	1.03794	0.90467	0.38
Dld	NP_031887	NM_007861	48.059	509	475	205	250	170	120	300	3.14345	1.70288	2.13928	1.24871	0.826832	1.36927	0.463
Dlg1	NP_001239362	NM_001252433	3.63863	893	37	12	20	38.5	16	51.3	0.139566	0.056817	0.0975492	0.16119	0.062838	0.13346	-0.026
Dlg1	NP_031888	NM_007862	0.294977	927	37	12	20	38.5	16	51.3	0.134448	0.0547331	0.0939713	0.155278	0.0605333	0.128565	-0.025
Dlg1	NP_001239364	NM_001252435	7.95657	905	37	12	20	38.5	16	51.3	0.137716	0.0560636	0.0962557	0.159053	0.0620048	0.13169	-0.032
Dlg1	NP_001239363	NM_001252434	4.45962	872	37	12	20	38.5	16	51.3	0.142928	0.0581853	0.0998984	0.165072	0.0643513	0.136674	-0.029
Dlg1	NP_001239365	NM_001252436	1.55266	834	8	17	18	0	36	0	0.0323113	0.086185	0.0940051	0	0.151388	0	-0.324
Dlg2	NP_035937	NM_011807	7.28148	852	6	0	0	41	45	103.8	0.0237215	0	0	0.179918	0.185237	0.283037	-1.616
Dlg2	NP_001229976	NM_001243047	22.9619	334	0	0	0	25	45	85	0	0	0	0.279849	0.47252	0.591232	-2.048
Dlg3	NP_058027	NM_016747	2.98683	849	0	0	10	5	6	5	0	0	0.0513024	0.0220187	0.0247855	0.0136819	-0.032
Dlg3	NP_001171249	NM_001177778	2.50969	835	0	0	10	5	6	5	0	0	0.0521625	0.0223879	0.0252011	0.0139113	-0.037
Dlg3	NP_001171250	NM_001177779	0.203367	512	0	0	0	0	6	0	0	0	0	0	0.0410994	0	-1.076
Dlg4	NP_031890	NM_007864	88.8137	724	81	40	40	65	40	112.8	0.376858	0.233599	0.240639	0.335664	0.193765	0.361956	-0.108
Dlg4	NP_001103222	NM_001109752	19.0489	721	0	40	40	65	40	112.8	0	0.23457	0.241641	0.337061	0.194571	0.363462	-0.545
Dlg5	NP_001156985	NM_001163513	6.01529	1921	0	5	0	0	0	0	0	0.011005	0	0	0	0	1.101
Dlg5	NP_082002	NM_027726	2.80046	1898	0	5	0	0	0	0	0	0.0111384	0	0	0	0	1.092
Dlst	NP_084501	NM_030225	26.58	454	320	190	160	90	140	120	2.37424	1.76948	1.535	0.741168	1.0815	0.61406	0.576
Dmap1	NP_075667	NM_023178	8.29657	468	0	0	0	0	50	50	0	0	0	0	0.374695	0.248204	-3.765
Dmd	NP_031894	NM_007868	22.8668	3678	0	55	110	20	130	50	0	0.0632266	0.130265	0.0203305	0.123961	0.0315823	-0.465
Dmwd	NP_034188	NM_010058	19.8076	665	0	0	20	0	10	0	0	0	0.130995	0	0.0527391	0	0.264
Dmxl1	NP_001074840	NM_001081371	9.21254	3013	0	0	0	0	0	20	0	0	0	0	0	0.0154211	-2.222
Dmxl2	NP_766359	NM_172771	41.1801	3054	0	120	0	0	190	550	0	0.166135	0	0	0.218192	0.418388	-2.301
Dnahc14	XP_003689383	XM_003689335	notfound	4601	0	0	0	25	0	0	0	0	0	0.020315	0	0	2.381
Dnahc14	XP_003688820	XM_003688772	0.016428	4601	0	0	0	25	0	0	0	0	0	0.020315	0	0	2.366
Dnahc3	XP_003086710	XM_003086662	0.031929	3831	0	0	11	0	0	0	0	0	0.0125062	0	0	0	1.691
Dnahc3	XP_355934	XM_355934	3e-06	4095	0	0	11	0	0	0	0	0	0.0116999	0	0	0	1.659
Dnahc3	XP_003084792	XM_003084744	4e-06	4088	0	0	11	0	0	0	0	0	0.01172	0	0	0	1.672
Dnahc7a	NP_001238999	NM_001252070	0.334642	4024	0	9	0	0	0	0	0	0.00945656	0	0	0	0	1.51
Dnahc7b	NP_001153858	NM_001160386	1.92569	4068	0	9	37	0	0	0	0	0.00935428	0.0396156	0	0	0	2.908
Dnahc7c	XP_003084484	XM_003084436	0.560852	4092	0	9	17	0	0	0	0	0.00929941	0.018095	0	0	0	2.36
Dnahc8	NP_038839	NM_013811	0.135422	4731	0	0	0	0	30	0	0	0	0	0	0.0222394	0	-2.644
Dnahc9	NP_001093103	NM_001099633	1.50579	4484	0	0	30	0	0	0	0	0	0.0291408	0	0	0	2.539
Dnaja1	NP_001158143	NM_001164671	3.64492	397	70	20	30	40	50	40	0.593934	0.213004	0.329136	0.376703	0.441706	0.234075	0.079
Dnaja2	NP_062768	NM_019794	33.1795	412	0	55	0	0	20	40	0	0.564435	0	0	0.17025	0.225553	-0.538
Dnaja3	NP_076135	NM_023646	2.96246	480	30	7	30	0	0	5	0.210528	0.0616603	0.272223	0	0	0.0241999	1.996
Dnaja3	NP_001128584	NM_001135112	7.61899	453	30	7	0	0	0	5	0.223076	0.0653354	0	0	0	0.0256423	1.444
Dnaja4	NP_067397	NM_021422	7.64332	397	0	0	0	10	0	10	0	0	0	0.0941758	0	0.0585187	-0.324
Dnajb1	NP_061278	NM_018808	11.2231	340	55	0	0	0	0	10	0.544897	0	0	0	0	0.0683292	1.197
Dnajb11	NP_080676	NM_026400	0.091568	358	5	10	20	0	70	30	0.0470455	0.118104	0.243328	0	0.685755	0.194681	-1.53
Dnajb12	NP_064349	NM_019965	19.8502	376	0	0	0	0	0	10	0	0	0	0	0	0.0617871	-1.563
Dnajb2	NP_001153355	NM_001159883	4.01612	324	0	0	0	10	0	0	0	0	0	0.115394	0	0	1.61
Dnajb2	NP_835156	NM_178055	7.59704	277	0	0	0	10	0	0	0	0	0	0.134974	0	0	1.603
Dnajb6	NP_001120839	NM_001127367	2.141	241	0	0	0	2.5	2	2.5	0	0	0	0.038784	0.029105	0.0240995	-0.241
Dnajb6	NP_001033029	NM_001037940	7.8111	365	0	35	0	2.5	2	2.5	0	0.405437	0	0.0256081	0.0192172	0.0159123	1.787
Dnajb6	NP_001033030	NM_001037941	1.68848	261	0	0	0	2.5	2	2.5	0	0	0	0.0358121	0.0268747	0.0222528	-0.24
Dnajb6	NP_035977	NM_011847	63.44	242	5	0	0	2.5	2	2.5	0.0695962	0	0	0.0386237	0.0289847	0.0239999	0.302
Dnajc10	NP_077143	NM_024181	12.4737	793	0	0	40	20	50	90	0	0	0.219701	0.0942946	0.221132	0.263666	-1.315
Dnajc11	NP_766292	NM_172704	11.9023	559	0	0	0	0	30	50	0	0	0	0	0.188219	0.207799	-3.541
Dnajc13	NP_001156498	NM_001163026	11.5761	2243	0	305	340	80	0	210	0	0.574936	0.660229	0.133349	0	0.217508	0.738
Dnajc16	NP_758841	NM_172338	7.55894	772	0	0	0	0	0	10	0	0	0	0	0	0.0300932	-1.565
Dnajc19	NP_001021382	NM_001026211	9.39449	157	0	17	5	0	0	0	0	0.457823	0.138712	0	0	0	2.214
Dnajc19-ps	XP_003084767	XM_003084719	5.5844	116	0	17	5	0	0	0	0	0.61964	0.18774	0	0	0	2.245
Dnajc24	NP_081268	NM_026992	7.98146	148	0	10	0	0	0	0	0	0.285685	0	0	0	0	1.611
Dnajc3	NP_032955	NM_008929	9.11586	504	35	25	0	0	10	0	0.23392	0.209729	0	0	0.0695863	0	1.257
Dnajc5	NP_058055	NM_016775	55.7514	198	45	50	40	10	0	0	0.765558	1.06771	0.879913	0.188827	0	0	4.035
Dnajc6	NP_001158055	NM_001164583	5.2022	968	0	4	19	13.2	16	35.5	0	0.0174716	0.0854916	0.0509833	0.0579694	0.0851998	-0.828
Dnajc6	NP_001158056	NM_001164584	5.56263	938	0	4	9	13.2	16	35.5	0	0.0180304	0.0417912	0.0526139	0.0598234	0.0879247	-1.135
Dnajc6	NP_940804	NM_198412	5.9891	900	0	4	9	13.2	26	35.5	0	0.0187917	0.0435557	0.0548354	0.101318	0.0916371	-1.322
Dnajc7	NP_062769	NM_019795	45.7018	494	0	0	0	0	0	10	0	0	0	0	0	0.0470282	-1.543
Dnajc8	NP_765988	NM_172400	53.2866	253	0	0	0	0	10	50	0	0	0	0	0.138622	0.459129	-3.264
Dnajc9	NP_598842	NM_134081	12.5534	259	0	0	0	0	0	50	0	0	0	0	0	0.448493	-3.139
Dnm1	NP_034195	NM_010065	70.088	864	148	214	295	444	434	879.7	0.577004	1.04725	1.48715	1.92132	1.76169	2.36541	-0.676
Dnm1l	NP_001021118	NM_001025947	33.0303	699	12	0	35	40	30	110	0.0578276	0	0.21809	0.21395	0.150521	0.365596	-0.962
Dnm1l	NP_690029	NM_152816	6.37916	712	12	10	35	40	30	110	0.0567717	0.0593839	0.214108	0.210044	0.147773	0.35892	-0.868
Dnm2	NP_031897	NM_007871	0.967337	866	0	24	19	0	0	0	0	0.117177	0.095561	0	0	0	2.819
Dnm2	NP_001034609	NM_001039520	7.42687	869	0	29	19	59.9	45	128.1	0	0.1411	0.0952311	0.257713	0.181613	0.342464	-0.966
Dnm2	NP_001240823	NM_001253894	6.17506	860	0	24	19	59.9	45	128.1	0	0.117994	0.0962277	0.26041	0.183514	0.346048	-1.012
Dnm2	NP_001240822	NM_001253893	0.045003	870	0	24	19	59.9	45	128.1	0	0.116638	0.0951217	0.257417	0.181404	0.34207	-1.011
Dnm3	NP_001033708	NM_001038619	21.9314	863	48	87	52	157.5	118	306.7	0.187353	0.426243	0.262445	0.682338	0.47954	0.825635	-0.711
Dnm3	NP_766234	NM_172646	5.18967	859	48	82	52	157.5	118	306.7	0.188226	0.403617	0.263667	0.685515	0.481773	0.82948	-0.721
Dnmt1	NP_001186362	NM_001199433	0.23482	1502	0	0	0	0	12	30	0	0	0	0	0.0280198	0.046402	-2.887
Dnmt1	NP_001186360	NM_001199431	6.23733	1620	0	0	0	0	12	30	0	0	0	0	0.0259789	0.0430221	-2.931
Dnmt1	NP_034196	NM_010066	5.3177	1619	0	0	0	0	12	30	0	0	0	0	0.0259949	0.0430487	-2.922
Dnmt1	NP_001186361	NM_001199432	1.41343	1501	0	0	0	0	12	30	0	0	0	0	0.0280385	0.0464329	-2.968
Dnmt3a	NP_031898	NM_007872	36.0165	908	0	0	0	0	564	600	0	0	0	0	2.17845	1.53515	-6.335
Dnmt3b	NP_001116469	NM_001122997	0.134499	860	0	0	0	0	16	0	0	0	0	0	0.0652493	0	-1.983
Dnmt3b	NP_001003963	NM_001003963	6e-06	796	0	0	0	0	16	0	0	0	0	0	0.0704954	0	-2.012
Dnmt3b	NP_034198	NM_010068	0.305476	776	0	0	0	0	16	0	0	0	0	0	0.0723123	0	-2.022
Dnmt3b	NP_001003961	NM_001003961	2e-06	859	0	0	0	0	16	0	0	0	0	0	0.0653252	0	-2.025
Dnmt3b	NP_001003960	NM_001003960	0.036415	839	0	0	0	0	16	0	0	0	0	0	0.0668824	0	-2.012
Dnpep	NP_001104301	NM_001110831	4.09058	475	97	7	25	60	25	70	0.687874	0.0623093	0.229241	0.472267	0.184587	0.342365	0.191
Dnpep	NP_058574	NM_016878	15.9083	473	87	7	25	60	25	70	0.619568	0.0625728	0.23021	0.474264	0.185367	0.343813	0.136
Dntt	NP_033371	NM_009345	0.000196	530	0	0	10	0	0	0	0	0	0.0821806	0	0	0	1.58
Dnttip2	NP_722501	NM_153806	28.6044	758	0	0	0	0	30	30	0	0	0	0	0.138805	0.091947	-3.256
Dock1	NP_001028592	NM_001033420	2.2749	1865	0	0	0	50	0	0	0	0	0	0.100235	0	0	3
Dock3	NP_700462	NM_153413	6.45788	2030	10	0	0	0	0	10	0.0165934	0	0	0	0	0.0114443	-0.32
Dock7	NP_080358	NM_026082	8.54868	2098	0	0	50	0	0	60	0	0	0.103803	0	0	0.0664402	-0.637
Dock8	NP_083061	NM_028785	0.58016	2100	30	0	0	0	0	0	0.0481208	0	0	0	0	0	2.538
Dock9	NP_001074508	NM_001081039	1.90741	2113	0	0	25	12.5	0	0	0	0	0.051533	0.0221177	0	0	2.731
Dock9	NP_001121779	NM_001128307	1.6859	2055	0	0	15	12.5	0	0	0	0	0.0317925	0.022742	0	0	2.409
Dock9	NP_598835	NM_134074	3.75132	2058	0	0	15	12.5	0	0	0	0	0.0317461	0.0227088	0	0	2.431
Dock9	NP_001121780	NM_001128308	1.85402	2042	0	0	15	12.5	0	0	0	0	0.0319949	0.0228867	0	0	2.419
Dpf1	NP_038902	NM_013874	2.1591	388	0	0	0	0	0	20	0	0	0	0	0	0.119752	-2.222
Dpf3	NP_478119	NM_058212	29.3585	356	0	0	0	0	0	20	0	0	0	0	0	0.130516	-2.232
Dpm1	NP_034202	NM_010072	9.73463	260	0	45	50	0	90	30	0	0.731792	0.83761	0	1.21401	0.268061	-0.716
Dpm3	NP_081043	NM_026767	26.2999	92	0	0	10	0	20	10	0	0	0.473432	0	0.762423	0.252521	-1.341
Dpp10	NP_950186	NM_199021	5.83643	800	0	5	0	0	35	0	0	0.0264258	0	0	0.153438	0	-2.029
Dpp3	NP_598564	NM_133803	10.1082	738	15	40	0	80	60	190	0.0684645	0.229167	0	0.405288	0.285134	0.598112	-1.108
Dpp4	NP_001153015	NM_001159543	0.172133	729	0	45	30	125	0	25	0	0.260996	0.179242	0.64108	0	0.0796706	1.558
Dpp4	NP_034204	NM_010074	0.355449	760	80	45	30	125	0	25	0.354574	0.25035	0.17193	0.614931	0	0.0764208	1.896
Dpp6	NP_034205	NM_010075	0.034358	804	0	3	25	7.5	0	0	0	0.0157766	0.135434	0.0348767	0	0	2.644
Dpp6	NP_001185815	NM_001198886	3.09936	801	1	3	25	7.5	0	0	0.00420531	0.0158357	0.135942	0.0350073	0	0	2.635
Dpp6	NP_001129532	NM_001136060	16.1514	803	1	3	25	7.5	0	0	0.00419484	0.0157963	0.135603	0.0349201	0	0	2.632
Dpp6	NP_997165	NM_207282	1.91933	859	1	8	25	7.5	105	240	0.00392137	0.0393773	0.126763	0.0326436	0.428697	0.649088	-2.632
Dpp7	NP_114031	NM_031843	4.38291	506	0	0	0	0	0	10	0	0	0	0	0	0.0459129	-1.579
Dpy19l1	NP_766508	NM_172920	7.77834	746	0	0	0	0	40	0	0	0	0	0	0.188051	0	-2.89
Dpy19l2	NP_001159679	NM_001166207	0	773	0	0	0	10	0	0	0	0	0	0.0483671	0	0	1.593
Dpy30	NP_077746	NM_024428	0.12449	99	0	0	0	0	0	20	0	0	0	0	0	0.469332	-2.254
Dpysl2	NP_034085	NM_009955	37.0289	572	476	460	586	999.9	991	1536.6	2.80312	3.40025	4.46218	6.53567	6.07619	6.24094	-0.502
Dpysl3	NP_001129558	NM_001136086	66.5579	568	320	194	233	339.1	281	0	1.89772	1.44412	1.7867	2.23208	1.73505	0	0.852
Dpysl3	NP_033494	NM_009468	29.2524	570	324	174	203	339.1	286	988	1.9147	1.29069	1.55119	2.22425	1.75973	4.02687	-0.703
Dpysl4	NP_036123	NM_011993	28.9965	572	174	85	199	366.5	343	898.1	1.02467	0.628306	1.51531	2.39556	2.10306	3.64766	-0.909
Dpysl5	NP_075534	NM_023047	16.8774	564	65	60	0	180	240	490	0.388208	0.449801	0	1.19323	1.4924	2.01838	-1.368
Drap1	NP_077138	NM_024176	51.6245	205	0	0	0	0	0	10	0	0	0	0	0	0.113327	-1.546
Drg1	NP_031905	NM_007879	18.2083	367	0	0	0	0	40	15	0	0	0	0	0.38225	0.0949534	-3.185
Drg2	NP_067329	NM_021354	15.0897	364	0	0	10	0	30	55	0	0	0.119659	0	0.289051	0.351032	-2.409
Dsg1a	NP_034209	NM_010079	0.030146	1057	0	0	0	10	0	0	0	0	0	0.0353716	0	0	1.592
Dsg1b	NP_859010	NM_181682	0.014613	1060	0	0	0	10	0	0	0	0	0	0.0352715	0	0	1.597
Dsg2	NP_031909	NM_007883	0.439357	1122	0	0	0	0	0	10	0	0	0	0	0	0.0207058	-1.523
Dsp	NP_076331	NM_023842	0.051251	2883	185	0	30	180	20	110	0.216151	0	0.0453233	0.233431	0.0243298	0.0886407	0.619
Dst	NP_604443	NM_134448	0.734213	7393	0	81	200	5	65	0	0	0.0463247	0.11783	0.00252859	0.0308352	0	0.976
Dst	NP_598594	NM_133833	10.0946	5379	0	18	0	0	55	0	0	0.0141488	0	0	0.0358604	0	-1.484
Dstn	NP_062745	NM_019771	103.936	165	88	90	86	39.9	59	33.3	1.79651	2.30625	2.27018	0.904105	1.25407	0.468863	0.698
Dtd1	NP_079590	NM_025314	14.12	209	0	0	20	0	10	0	0	0	0.416801	0	0.167806	0	0.27
Dtna	NP_997533	NM_207650	4.32062	682	0	0	0	0	0	3.3	0	0	0	0	0	0.0112413	-0.582
Dtnb	NP_001155937	NM_001162465	0.39881	659	0	0	0	0	0	3.3	0	0	0	0	0	0.0116336	-0.559
Dtnb	NP_031912	NM_007886	2.55005	602	0	0	0	0	0	3.3	0	0	0	0	0	0.0127351	-0.532
Dtymk	NP_001099137	NM_001105667	9.87144	212	25	25	60	0	20	0	0.397223	0.498601	1.23271	0	0.330863	0	1.186
Dus3l	NP_659107	NM_144858	8.98174	637	0	0	0	0	10	50	0	0	0	0	0.0550573	0.182354	-3.282
Dusp3	NP_082483	NM_028207	11.8093	185	0	20	0	20	10	30	0	0.457095	0	0.404192	0.189576	0.376734	-0.447
Dut	NP_001153118	NM_001159646	3.21162	200	32	0	0	0	0	0	0.538953	0	0	0	0	0	2.621
Dut	NP_076084	NM_023595	6.10721	162	17	0	0	0	0	0	0.35348	0	0	0	0	0	2.051
Dym	NP_082003	NM_027727	12.1956	669	0	0	0	0	10	0	0	0	0	0	0.0524237	0	-1.524
Dync1h1	NP_084514	NM_030238	55.4948	4644	180	1865	140	260	1570	4670	0.13056	1.69799	0.131305	0.20932	1.18566	2.3362	-1.437
Dync1i1	NP_001177956	NM_001191027	0.215076	597	0	0	0	2	2	2	0	0	0	0.0125252	0.0117492	0.00778289	-0.207
Dync1i1	NP_034193	NM_010063	4.07859	628	0	0	0	2	2	2	0	0	0	0.0119069	0.0111693	0.0073987	-0.227
Dync1i1	NP_001177954	NM_001191025	1.3921	608	0	0	0	2	2	2	0	0	0	0.0122986	0.0115367	0.00764208	-0.221
Dync1i1	NP_001177955	NM_001191026	0.478344	617	0	0	0	2	2	2	0	0	0	0.0121192	0.0113684	0.00753061	-0.228
Dync1i1	NP_001177952	NM_001191023	1.27181	625	0	0	0	2	2	2	0	0	0	0.0119641	0.0112229	0.00743422	-0.214
Dync1i2	NP_034194	NM_010064	18.5018	612	0	0	31	0	6	0	0	0	0.220625	0	0.0343838	0	1.137
Dync1i2	NP_001185804	NM_001198875	0.097149	618	0	7	31	0	6	0	0	0.0478915	0.218483	0	0.03405	0	1.309
Dync1i2	NP_001185803	NM_001198874	17.8556	632	27	0	29	13.2	6	29.9	0.143906	0	0.19986	0.0780884	0.0332957	0.109911	0.177
Dync1i2	NP_001185802	NM_001198873	0	650	27	7	29	13.2	6	29.9	0.13992	0.0455337	0.194325	0.075926	0.0323737	0.106867	0.261
Dync1i2	NP_001185801	NM_001198872	0	655	27	15	29	13.2	6	29.9	0.138852	0.0968275	0.192842	0.0753464	0.0321265	0.106051	0.363
Dync1li1	NP_666341	NM_146229	41.4339	523	110	65	50	100	70	160	0.70847	0.525485	0.416403	0.714872	0.469408	0.710728	-0.156
Dync1li2	NP_001013398	NM_001013380	22.6884	492	20	0	0	0	50	50	0.136929	0	0	0	0.356417	0.236097	-1.976
Dync2h1	NP_084127	NM_029851	6.67305	4306	0	30	0	0	0	0	0	0.0294575	0	0	0	0	2.541
Dynll1	NP_062656	NM_019682	43.1169	89	0	20	0	0	0	0	0	0.950142	0	0	0	0	2.16
Dynll2	NP_001161944	NM_001168472	1.58088	89	35	0	0	40	40	60	1.32467	0	0	1.68035	1.57625	1.5662	-0.761
Dynlrb1	NP_080223	NM_025947	185.203	96	15	30	40	30	50	40	0.526321	1.32129	1.81482	1.16837	1.82664	0.967997	-0.254
Dyrk1a	NP_031916	NM_007890	2.21437	763	0	0	0	0	30	0	0	0	0	0	0.137896	0	-2.612
Dyrk1b	NP_001033046	NM_001037957	5.66438	629	0	2	0	0	0	0	0	0.013444	0	0	0	0	0.612
Dyrk1b	NP_034222	NM_010092	13.2335	589	0	2	0	0	0	0	0	0.014357	0	0	0	0	0.589
Dyrk2	NP_001014412	NM_001014390	47.9716	599	0	35	40	0	0	0	0	0.247053	0.290856	0	0	0	3.371
Dysf	NP_001071162	NM_001077694	0.102853	2099	0	0	0	0	0	10	0	0	0	0	0	0.0110681	-1.55
Dysf	NP_067444	NM_021469	0.34917	2100	0	0	0	0	0	10	0	0	0	0	0	0.0110628	-1.548
Dyx1c1	NP_080590	NM_026314	3.80718	420	0	0	0	0	20	0	0	0	0	0	0.167007	0	-2.228
Crocc2	XP_001474905	XM_001474855	0.101905	1710	5	0	0	0	0	0	0.00984928	0	0	0	0	0	1.101
Crocc2	XP_982250	XM_977156	notfound	1710	5	0	0	0	0	0	0.00984928	0	0	0	0	0	1.074
E230008N13Rik	NP_941062	NM_198660	0.414537	1664	0	40	0	0	0	0	0	0.101638	0	0	0	0	2.798
Ebf1	NP_031923	NM_007897	8.07855	591	0	0	0	0	0	2	0	0	0	0	0	0.00786191	-0.115
Ebf2	NP_034225	NM_010095	0.13825	575	0	0	0	0	0	2	0	0	0	0	0	0.00808067	-0.114
Ebf3	NP_001106885	NM_001113414	6.90951	587	0	0	0	0	0	2	0	0	0	0	0	0.00791548	-0.114
Ebf3	NP_001106886	NM_001113415	0.881419	596	0	0	0	0	0	2	0	0	0	0	0	0.00779595	-0.152
Ebf3	NP_034226	NM_010096	4.08509	551	0	0	0	0	0	2	0	0	0	0	0	0.00843264	-0.155
Ebna1bp2	NP_081208	NM_026932	12.1825	306	0	5	0	0	0	10	0	0.0690871	0	0	0	0.0759214	-0.821
Ebp	NP_031924	NM_007898	7.96277	230	0	0	0	0	80	40	0	0	0	0	1.21988	0.404034	-3.993
Ebpl	NP_080874	NM_026598	31.4524	206	10	0	10	0	0	0	0.163517	0	0.211436	0	0	0	2.123
Ech1	NP_058052	NM_016772	12.8452	327	0	25	30	30	20	10	0	0.323252	0.399594	0.343007	0.214504	0.0710457	0.566
Echdc1	NP_001103665	NM_001110195	0.429995	299	0	7	0	0	0	5	0	0.0989864	0	0	0	0.0388494	0.065
Echdc1	NP_080131	NM_025855	1.12191	322	0	7	0	0	0	5	0	0.0919159	0	0	0	0.0360744	0.052
Echs1	NP_444349	NM_053119	12.2821	290	235	230	160	60	110	120	2.72961	3.35335	2.40307	0.77354	1.3303	0.961321	0.593
Eci1	NP_034153	NM_010023	9.57033	289	145	150	140	20	40	80	1.69006	2.19453	2.10997	0.258739	0.485418	0.643099	0.835
Eci2	NP_001103801	NM_001110331	8.89133	391	97	17	0	0	10	15	0.835653	0.183832	0	0	0.0896969	0.0891251	1.056
Eci2	NP_035998	NM_011868	3.67855	358	7	17	0	0	0	15	0.0658636	0.200777	0	0	0	0.0973405	0.002
Ecsit	NP_036159	NM_012029	2.76195	435	0	0	10	0	0	0	0	0	0.100128	0	0	0	1.594
Edc4	NP_853625	NM_181594	8.06789	1390	260	120	0	80	0	110	0.630071	0.365019	0	0.215182	0	0.18385	0.927
Edem1	NP_619618	NM_138677	2.02162	652	0	5	0	0	0	0	0	0.0324243	0	0	0	0	1.099
Edem3	NP_001034733	NM_001039644	13.0877	931	0	0	0	0	0	10	0	0	0	0	0	0.0249537	-1.542
Edf1	NP_067494	NM_021519	67.7143	148	35	60	40	0	40	50	0.796594	1.71411	1.17718	0	0.947878	0.784863	-0.085
Eea1	NP_001001932	NM_001001932	6.88086	1411	0	0	0	40	0	0	0	0	0	0.105989	0	0	2.809
Eed	NP_068676	NM_021876	9.55078	441	0	0	0	0	20	0	0	0	0	0	0.159054	0	-2.226
Eef1a1	NP_034236	NM_010106	1194.03	462	372	255	410	510	395	590	2.71226	2.33371	3.86533	4.12722	2.99854	2.96685	-0.046
Eef1a2	NP_031932	NM_007906	50.2405	463	207	60	0	210	195	340	1.50598	0.547922	0	1.69577	1.47709	1.70602	-0.611
Eef1b2	NP_061266	NM_018796	23.2789	225	30	42	30	40	40	70	0.449127	0.789252	0.580743	0.664672	0.623493	0.722771	-0.245
Eef1d	NP_075729	NM_023240	5.00622	281	122	57	0	25	0	0	1.46246	0.857664	0	0.332632	0	0	4.359
Eef1d	NP_083939	NM_029663	5.59784	660	0	25	100	25	130	130	0	0.160157	0.659935	0.14162	0.690802	0.457599	-1.043
Eef1e1	NP_079656	NM_025380	21.7534	174	0	40	20	0	10	20	0	0.971985	0.50064	0	0.20156	0.267034	0.235
Eef1g	NP_080283	NM_026007	89.0246	437	300	145	180	170	210	910	2.31244	1.40293	1.79406	1.45444	1.68536	4.83777	-0.844
Eef2	NP_031933	NM_007907	315.477	858	465	231	256	626.6	326	693.3	1.82556	1.13834	1.29956	2.73044	1.33255	1.87724	-0.062
Eefsec	NP_075547	NM_023060	3.27698	583	0	0	0	0	0	10	0	0	0	0	0	0.0398489	-1.552
Efhd2	NP_080270	NM_025994	6.43354	240	0	15	0	0	0	30	0	0.264258	0	0	0	0.290399	-1.038
Efnb1	NP_034240	NM_010110	4.1319	345	0	0	0	0	30	10	0	0	0	0	0.304969	0.0673389	-2.873
Efnb2	NP_034241	NM_010111	6.91075	336	0	0	10	0	0	0	0	0	0.12963	0	0	0	1.583
Efr3a	NP_598527	NM_133766	21.2751	819	0	40	30	70	60	50	0	0.206502	0.159545	0.319554	0.256934	0.141831	-0.249
Eftud1	NP_780526	NM_175317	2.05465	1127	0	0	0	0	0	10	0	0	0	0	0	0.020614	-1.563
Eftud2	NP_035561	NM_011431	17.5639	971	0	36	36	51.6	269	398.3	0	0.156759	0.161484	0.198683	0.971599	0.952964	-2.183
Eftud2	NP_001103465	NM_001109995	2.11126	972	75	36	36	51.6	269	398.3	0.259912	0.156598	0.161317	0.198478	0.970599	0.951983	-1.711
Egf	NP_034243	NM_010113	0.600455	1217	0	0	0	10	0	0	0	0	0	0.0307213	0	0	1.609
Egflam	NP_848863	NM_178748	35.7184	1009	0	0	0	0	0	30	0	0	0	0	0	0.0690741	-2.604
Egfr	NP_997538	NM_207655	1.76601	1210	0	0	0	30	0	0	0	0	0	0.092697	0	0	2.54
Ehbp1	NP_694718	NM_153078	7.5868	1206	0	0	0	10	0	0	0	0	0	0.0310015	0	0	1.602
Ehd1	NP_034249	NM_010119	7.02015	534	0	0	0	70	0	50	0	0	0	0.490102	0	0.217527	-0.135
Ehd3	NP_065603	NM_020578	8.7662	535	30	0	0	75	55	75	0.188885	0	0	0.524128	0.360548	0.325681	-0.693
Ehd4	NP_598599	NM_133838	7.69013	541	0	30	0	135	15	55	0	0.234462	0	0.932967	0.0972407	0.236184	0.371
Ehmt2	NP_665829	NM_145830	5.76525	1263	0	0	0	0	5	0	0	0	0	0	0.0138842	0	-0.918
Ehmt2	NP_671493	NM_147151	13.5593	1172	40	0	0	0	5	0	0.114964	0	0	0	0.0149622	0	1.543
Eif1	NP_035638	NM_011508	89.2383	113	5	0	0	0	0	0	0.149047	0	0	0	0	0	1.102
Eif2a	NP_001005509	NM_001005509	15.8762	581	0	0	20	10	50	50	0	0	0.149934	0.0643508	0.30182	0.199931	-1.645
Eif2b1	NP_663346	NM_145371	7.23354	305	0	0	0	0	0	20	0	0	0	0	0	0.152341	-2.212
Eif2b3	NP_001104747	NM_001111277	10.2495	452	0	0	0	0	0	20	0	0	0	0	0	0.102796	-2.223
Eif2b3	NP_780344	NM_175135	0.285406	445	0	0	0	0	0	20	0	0	0	0	0	0.104413	-2.23
Eif2b4	NP_001120827	NM_001127355	1.60459	544	0	0	0	0	0	10	0	0	0	0	0	0.0427058	-1.573
Eif2b4	NP_034252	NM_010122	8.57633	524	0	0	0	0	0	10	0	0	0	0	0	0.0443358	-1.571
Eif2b5	NP_758469	NM_172265	12.5124	717	0	0	0	0	40	30	0	0	0	0	0.195657	0.0972047	-3.446
Eif2c1	NP_700452	NM_153403	9.23163	857	0	100	65	40	90	48.2	0	0.493364	0.330353	0.174505	0.368312	0.130663	-0.097
Eif2c2	NP_694818	NM_153178	7.80853	860	0	110	95	110	120	173.2	0	0.540808	0.481139	0.478216	0.489369	0.46788	-0.424
Eif2c3	NP_700451	NM_153402	3.79641	860	0	0	0	0	0	28.2	0	0	0	0	0	0.0761791	-2.578
Eif2s1	NP_080390	NM_026114	9.52078	315	75	0	0	0	130	90	0.802013	0	0	0	1.44739	0.66377	-1.542
Eif2s2	NP_080306	NM_026030	22.421	331	0	0	0	0	3	25	0	0	0	0	0.0317868	0.175468	-2.539
Eif2s3x	NP_036140	NM_012010	39.1204	472	0	28	50	20	65	100	0	0.250821	0.461395	0.158423	0.482976	0.492202	-1.011
Eif2s3y	NP_036141	NM_012011	29.6358	472	0	0	0	0	35	0	0	0	0	0	0.260064	0	-2.77
Eif3a	NP_034253	NM_010123	33.1607	1344	0	185	150	240	80	250	0	0.581997	0.486113	0.667639	0.208759	0.432142	0.058
Eif3b	NP_598677	NM_133916	18.0361	803	50	70	70	150	50	240	0.209742	0.368579	0.379689	0.698402	0.218378	0.694354	-0.34
Eif3c	NP_666312	NM_146200	64.0134	911	135	110	100	140	100	260	0.499167	0.510532	0.478109	0.574565	0.384978	0.663041	-0.201
Eif3d	NP_061219	NM_018749	29.7824	548	45	25	0	100	40	40	0.276607	0.192889	0	0.682259	0.255996	0.169576	0.263
Eif3e	NP_032414	NM_008388	61.449	445	70	30	70	60	90	110	0.529869	0.285043	0.685146	0.504105	0.709311	0.574273	-0.358
Eif3f	NP_079620	NM_025344	54.345	361	115	60	50	120	50	150	1.07305	0.702737	0.603265	1.24281	0.485755	0.965316	0.045
Eif3g	NP_058572	NM_016876	32.3857	320	15	0	20	20	0	30	0.157896	0	0.272223	0.233674	0	0.217799	0.097
Eif3h	NP_542366	NM_080635	90.399	352	30	20	20	30	10	40	0.287084	0.240235	0.247476	0.318646	0.0996349	0.263999	0.194
Eif3i	NP_061269	NM_018799	40.7972	325	0	15	20	60	0	40	0	0.195145	0.268035	0.690236	0	0.285931	0.361
Eif3j1	NP_653128	NM_144545	14.7441	261	55	0	0	0	0	15	0.709828	0	0	0	0	0.133517	0.808
Eif3j2	NP_001242984	NM_001256055	8.19243	263	70	0	0	0	0	15	0.896547	0	0	0	0	0.132502	1.046
Eif3k	NP_082935	NM_028659	76.0558	218	0	10	0	0	0	10	0	0.193951	0	0	0	0.106569	-0.314
Eif3l	NP_660121	NM_145139	33.4861	564	0	50	10	110	130	230	0	0.374834	0.0772264	0.729194	0.808385	0.947402	-1.247
Eif3m	NP_663355	NM_145380	35.2135	374	0	0	0	0	0	20	0	0	0	0	0	0.124235	-2.223
Eif4a1	NP_659207	NM_144958	105.817	406	189	52	165	202.3	79	99	1.56807	0.541534	1.77012	1.86294	0.682425	0.566493	0.73
Eif4a1	NP_001152847	NM_001159375	3.67648	364	59	52	0	0	79	99	0.545986	0.604019	0	0	0.761167	0.631858	-0.952
Eif4a2	NP_001116510	NM_001123038	26.9869	362	77	9	0	92.3	59	89	0.716495	0.105119	0	0.953285	0.571607	0.571172	-0.31
Eif4a2	NP_038534	NM_013506	51.5554	407	77	9	0	92.3	59	89	0.637275	0.0934968	0	0.847885	0.508407	0.50802	-0.305
Eif4a3	NP_619610	NM_138669	32.6153	411	111	87	95	62.5	452	314	0.909729	0.895006	1.00676	0.568549	3.85701	1.7749	-1.266
Eif4b	NP_663600	NM_145625	42.5433	611	40	35	60	0	0	40	0.220521	0.242201	0.427716	0	0	0.152091	0.71
Eif4e	NP_031943	NM_007917	26.4483	217	0	0	0	10	10	0	0	0	0	0.172294	0.16162	0	-0.314
Eif4g1	NP_666053	NM_145941	21.4817	1600	0	2	0	12	27	75	0	0.00528517	0	0.0280408	0.0591831	0.1089	-2.374
Eif4g1	NP_001005331	NM_001005331	10.4822	1593	0	2	0	12	27	75	0	0.00530839	0	0.0281641	0.0594432	0.109378	-2.365
Eif4g2	NP_038535	NM_013507	133.034	906	0	35	35	20	65	140	0	0.163338	0.168262	0.0825338	0.251617	0.358992	-1.316
Eif4g2	NP_001035221	NM_001040131	1.22967	868	0	0	35	0	65	0	0	0	0.175628	0	0.262632	0	-1.05
Eif4g3	NP_001243124	NM_001256195	14.1821	1567	0	43	40	11.9	8	55	0	0.116024	0.111182	0.0283928	0.017905	0.0815416	-0.073
Eif4g3	NP_766291	NM_172703	14.3816	1578	0	3	0	11.9	8	55	0	0.00803828	0	0.0281948	0.0177802	0.0809732	-1.831
Eif4g3	NP_001243127	NM_001256198	5.7798	1464	0	3	0	11.9	8	0	0	0.00866421	0	0.0303903	0.0191647	0	0.166
Eif4h	NP_291039	NM_033561	52.578	248	50	65	70	30	80	70	0.679124	1.10818	1.2294	0.452272	1.13134	0.65574	-0.139
Eif5a	NP_001160064	NM_001166592	2e-06	154	65	47	15	110	40	80	1.42175	1.2904	0.424244	2.67056	0.910947	1.20685	0.184
Eif5a2	NP_808254	NM_177586	3.90748	153	0	12	15	0	0	0	0	0.331618	0.427017	0	0	0	2.395
Eif5b	NP_938045	NM_198303	12.7953	1216	0	0	0	0	10	70	0	0	0	0	0.0288417	0.133736	-3.563
Eif6	NP_034709	NM_010579	9.1399	245	0	0	10	0	10	20	0	0	0.177778	0	0.143149	0.189648	-1.35
Elavl1	NP_034615	NM_010485	9.7881	326	107	110	62	40	350	450	1.1056	1.42667	0.82836	0.458746	3.76534	3.20686	-1.419
Elavl2	NP_034616	NM_010486	1.42912	360	12	11	37	58.6	18	0	0.112282	0.129193	0.447656	0.60859	0.175357	0	1.353
Elavl2	NP_001171354	NM_001177883	4.98217	359	10	10	34	55.6	18	24.1	0.0938288	0.117775	0.412505	0.579042	0.175846	0.155958	0.466
Elavl2	NP_997568	NM_207685	0	373	10	10	34	55.6	18	24.1	0.0903071	0.113355	0.397023	0.557309	0.169246	0.150104	0.465
Elavl2	NP_997569	NM_207686	0.814841	347	9	9	0	0	18	0	0.0873663	0.109663	0	0	0.181927	0	-0.449
Elavl3	NP_034617	NM_010487	21.795	367	90	83	49	110.5	61	44.8	0.826052	0.956226	0.581534	1.12571	0.582932	0.283594	0.652
Elavl4	NP_001033787	NM_001038698	4.33425	380	26	27	29	42.2	29.4	19.1	0.230473	0.30042	0.332399	0.415201	0.271342	0.116771	0.45
Elavl4	NP_001156869	NM_001163397	2.00687	356	23	25	0	0	0	0	0.217625	0.296919	0	0	0	0	2.952
Elavl4	NP_034618	NM_010488	1.70074	385	26	27	29	42.2	30	19.1	0.22748	0.296518	0.328082	0.409809	0.273284	0.115255	0.434
Elavl4	NP_001156871	NM_001163399	4.21935	371	26	27	29	42.2	30	17.4	0.236064	0.307708	0.340462	0.425274	0.283597	0.108958	0.468
Elf2	NP_075991	NM_023502	15.1443	593	0	0	0	0	0	40	0	0	0	0	0	0.156708	-2.908
Elfn2	NP_898964	NM_183141	5.00512	823	0	0	0	0	10	20	0	0	0	0	0.0426142	0.0564567	-2.587
Elmo2	NP_997588	NM_207705	4.20789	798	0	0	6	3.3	20	20	0	0	0.0327487	0.0154611	0.0878984	0.0582254	-1.773
Elmo2	NP_997589	NM_207706	11.1825	732	0	0	6	3.3	0	0	0	0	0.0357014	0.0168552	0	0	1.455
Elmo2	NP_525026	NM_080287	0.683284	720	0	0	6	3.3	20	0	0	0	0.0362964	0.0171361	0.0974208	0	-1.125
Elmod2	NP_848851	NM_178736	20.5935	293	95	40	50	0	30	20	1.09216	0.57722	0.743272	0	0.359094	0.15858	0.82
Eln	NP_031951	NM_007925	5.44015	860	810	0	0	0	0	0	3.17261	0	0	0	0	0	5.751
Elovl4	NP_683743	NM_148941	7.1665	312	0	0	0	0	20	0	0	0	0	0	0.224817	0	-2.188
Elp2	NP_067423	NM_021448	25.5996	831	0	0	0	40	20	90	0	0	0	0.179965	0.0844079	0.251609	-1.441
Elp3	NP_001240741	NM_001253812	13.1403	566	0	0	5	0	5	20	0	0	0.0384768	0	0.0309819	0.0820916	-1.657
Elp3	NP_083087	NM_028811	4.33211	547	0	0	5	0	5	20	0	0	0.0398133	0	0.032058	0.0849431	-1.656
Emb	NP_034460	NM_010330	5.13091	330	0	0	0	30	10	20	0	0	0	0.339889	0.106277	0.1408	-0.399
Emc1	NP_001034289	NM_001039200	0.549802	994	5	0	30	0	80	100	0.0169439	0	0.131456	0	0.282265	0.233722	-2.093
Emc1	NP_666269	NM_146157	8.67095	997	0	0	20	0	70	100	0	0	0.0873735	0	0.246239	0.233018	-2.512
Emc10	NP_932108	NM_197991	20.1884	268	0	0	0	0	50	10	0	0	0	0	0.654319	0.0866863	-3.258
Emc2	NP_080012	NM_025736	19.1752	297	65	60	50	40	50	70	0.737204	0.854168	0.733261	0.503539	0.590429	0.547554	0.086
Emc3	NP_780310	NM_175101	17.4598	261	30	15	0	10	70	50	0.387179	0.242996	0	0.143248	0.940614	0.445056	-1.263
Emc4	NP_080795	NM_026519	45.9592	183	0	25	40	0	40	0	0	0.577614	0.952037	0	0.76659	0	0.002
Emc6	NP_079594	NM_025318	14.5061	110	0	0	40	0	10	0	0	0	1.58384	0	0.318832	0	0.897
Emc7	NP_598510	NM_133749	37.6203	241	0	0	20	0	30	30	0	0	0.361458	0	0.436574	0.289194	-1.473
Emc8	NP_035056	NM_010926	9.56195	207	20	10	0	0	30	20	0.325455	0.204258	0	0	0.508282	0.224463	-0.946
Emd	NP_031953	NM_007927	11.464	259	0	0	0	0	20	0	0	0	0	0	0.270822	0	-2.223
Eml1	NP_001036800	NM_001043335	2.94564	814	0	2	0	0	0	10	0	0.0103885	0	0	0	0.0285405	-1.321
Eml1	NP_001036801	NM_001043336	13.263	783	0	2	0	0	0	10	0	0.0107998	0	0	0	0.0296704	-1.292
Eml3	NP_659121	NM_144872	24.6641	897	0	0	30	20	0	60	0	0	0.145671	0.0833619	0	0.155398	-0.657
Eml4	NP_001107833	NM_001114361	3.18873	988	0	0	10	0	0	3.3	0	0	0.0440847	0	0	0.00775965	0.692
Eml4	NP_001107834	NM_001114362	4.95608	919	0	0	0	0	0	3.3	0	0	0	0	0	0.00834226	-0.544
Eml4	NP_955760	NM_199466	3.8e-05	876	0	0	0	0	0	3.3	0	0	0	0	0	0.00875176	-0.543
Eml5	NP_001074660	NM_001081191	35.0263	1977	0	0	0	10	0	0	0	0	0	0.0189114	0	0	1.593
Enah	NP_001076589	NM_001083120	11.9332	785	0	0	0	2.5	0	7.5	0	0	0	0.0119069	0	0.0221961	-0.931
Enah	NP_001076590	NM_001083121	8.06891	541	0	0	0	2.5	0	7.5	0	0	0	0.0172772	0	0.0322069	-0.94
Enah	NP_032706	NM_008680	0.965107	789	0	0	0	2.5	0	7.5	0	0	0	0.0118466	0	0.0220836	-0.956
Enah	NP_034265	NM_010135	0.926227	804	0	0	0	2.5	0	7.5	0	0	0	0.0116256	0	0.0216716	-0.938
Endod1	NP_082289	NM_028013	6.4448	501	0	0	30	0	70	40	0	0	0.260813	0	0.490021	0.185485	-1.711
Endog	NP_031957	NM_007931	2.29366	294	0	65	40	0	30	30	0	0.934791	0.592595	0	0.357872	0.237061	0.079
Engase	NP_766161	NM_172573	1.97963	734	0	0	0	0	20	30	0	0	0	0	0.0955626	0.0949534	-3.088
Eno1b	NP_001020559	NM_001025388	237.559	434	1090	820	1125	2223.3	823	1911.6	8.45994	7.98864	11.2904	19.1531	6.65065	10.2328	0.154
Eno2	NP_038537	NM_013509	80.6297	434	205	185	225	473.3	208	441.6	1.59109	1.80231	2.25807	4.07734	1.68084	2.36388	0.018
Eno3	NP_031959	NM_007933	6.27908	434	383	257	0	263.3	278	296.6	2.97262	2.50376	0	2.26825	2.24651	1.58769	-0.045
Enoph1	NP_080697	NM_026421	12.1482	257	20	0	0	20	0	30	0.262137	0	0	0.290956	0	0.27119	-0.189
Ensa	NP_001021383	NM_001026212	21.9413	117	0	0	0	3.3	0	0	0	0	0	0.105453	0	0	0.831
Ensa	NP_062507	NM_019561	25.2717	121	0	0	0	3.3	0	0	0	0	0	0.101967	0	0	0.86
Entpd2	NP_033979	NM_009849	1.68632	495	0	0	40	50	40	60	0	0	0.351965	0.377654	0.283406	0.281599	-0.585
Entpd5	NP_001021385	NM_001026214	2.57991	427	0	0	0	0	5	0	0	0	0	0	0.0410673	0	-0.93
Entpd5	NP_031673	NM_007647	1.90981	452	0	0	0	0	5	0	0	0	0	0	0.0387959	0	-0.89
Entpd6	NP_742115	NM_172117	3.18892	455	10	0	0	0	0	0	0.074032	0	0	0	0	0	1.616
Ep400	NP_083613	NM_029337	8.52253	3035	0	0	0	0	5	25	0	0	0	0	0.00577784	0.0191367	-2.586
Ep400	NP_775089	NM_173066	0.375199	2999	0	10	0	0	5	25	0	0.0140985	0	0	0.0058472	0.0193664	-1.343
Epb4.1	NP_001122078	NM_001128606	43.4894	804	184	168	193	305	280	454.1	0.77089	0.883491	1.04555	1.41832	1.22139	1.31214	-0.353
Epb4.1	NP_906273	NM_183428	4.43323	858	189	168	193	305	300	454.1	0.742002	0.827886	0.97975	1.32905	1.22628	1.22956	-0.371
Epb4.1l1	NP_001003815	NM_001003815	1.02775	866	23	0	42	23.3	37	51.6	0.0894624	0	0.21124	0.100593	0.149843	0.138426	-0.488
Epb4.1l1	NP_038538	NM_013510	0.726073	879	23	0	42	23.3	37	51.6	0.0881393	0	0.208116	0.0991053	0.147627	0.136379	-0.489
Epb4.1l2	NP_001186194	NM_001199265	7.05111	988	952	1026	922	1120	897	1642.5	3.24572	4.39075	4.06461	4.23829	3.18412	3.86219	-0.041
Epb4.1l3	NP_038841	NM_013813	32.7609	929	37	131	195	273.3	217	670.7	0.134158	0.596217	0.914248	1.0999	0.819215	1.67725	-0.833
Epb4.1l5	NP_663481	NM_145506	17.1731	731	0	0	30	0	0	0	0	0	0.178751	0	0	0	2.532
Epdr1	NP_598826	NM_134065	2.45558	224	0	0	0	20	0	0	0	0	0	0.33382	0	0	2.172
Epha4	NP_031962	NM_007936	7.06264	986	10	75	65	22.5	30	15	0.0341628	0.321613	0.287132	0.085317	0.106708	0.0353427	0.853
Epha5	NP_031963	NM_007937	6.62991	876	0	0	75	20	55	15	0	0	0.372909	0.0853603	0.220198	0.0397807	-0.171
Epha6	NP_031964	NM_007938	1.34773	1130	0	0	50	0	0	0	0	0	0.192724	0	0	0	3.016
Ephb1	NP_001161768	NM_001168296	0.217329	943	0	0	0	7.5	0	0	0	0	0	0.0297358	0	0	1.385
Ephb1	NP_775623	NM_173447	3.20736	984	0	0	0	7.5	0	0	0	0	0	0.0284968	0	0	1.387
Ephb2	NP_034272	NM_010142	6.8733	986	60	80	70	20	145	110	0.204977	0.343053	0.309219	0.0758373	0.515757	0.25918	-0.602
Ephb3	NP_034273	NM_010143	2.10574	993	0	0	0	12.5	0	0	0	0	0	0.0470642	0	0	1.785
Ephx1	NP_034275	NM_010145	2.10779	455	0	0	0	0	30	40	0	0	0	0	0.23124	0.204237	-3.409
Ephx2	NP_031966	NM_007940	6.99058	554	35	0	0	60	0	30	0.212809	0	0	0.404922	0	0.125805	0.661
Epm2aip1	NP_780475	NM_175266	23.7103	606	0	45	0	0	70	90	0	0.31397	0	0	0.405116	0.345029	-1.704
Epn1	NP_034277	NM_010147	28.3764	575	0	0	0	0	0	20	0	0	0	0	0	0.0808067	-2.217
Epn2	NP_001239118	NM_001252189	5.51105	583	10	0	15	20	0	6.6	0.057778	0	0.112064	0.12826	0	0.0263003	1.36
Epn2	NP_001239117	NM_001252188	1.99643	640	0	0	15	0	30	6.6	0	0	0.102084	0	0.164398	0.0239579	-1.213
Epn2	NP_034278	NM_010148	1.91562	595	0	0	0	0	0	6.6	0	0	0	0	0	0.0257699	-1.176
Eppk1	NP_659097	NM_144848	0.033275	6548	20	0	0	0	0	0	0.0102885	0	0	0	0	0	2.18
Eprs	NP_084011	NM_029735	25.7068	1512	90	25	120	240	120	280	0.200503	0.0699096	0.34568	0.593457	0.278345	0.430221	-0.328
Eps15	NP_031969	NM_007943	3.95888	897	0	0	0	20	0	0	0	0	0	0.0833619	0	0	2.172
Eps15l1	NP_031970	NM_007944	14.4947	907	22	0	30	45	50	50	0.0817045	0	0.144065	0.185496	0.193338	0.12807	-0.518
Eps15l1	NP_001116304	NM_001122832	3.79186	599	22	15	20	45	40	50	0.123716	0.10588	0.145428	0.280877	0.2342	0.193923	-0.37
Erap1	NP_109636	NM_030711	2.96473	930	0	0	0	30	20	50	0	0	0	0.120606	0.0754225	0.124903	-1.255
Erbb2ip	NP_067538	NM_021563	3.02549	1376	10	0	0	8	0	0	0.0244801	0	0	0.0217371	0	0	2.038
Erbb3	NP_034283	NM_010153	0.060381	1339	0	0	0	0	0	10	0	0	0	0	0	0.0173502	-1.544
Erc1	NP_444434	NM_053204	5.98611	1120	0	0	0	30	20	50	0	0	0	0.100146	0.0626276	0.103714	-1.254
Erc2	NP_808482	NM_177814	8.46791	1002	0	0	20	20	0	30	0	0	0.0869376	0.0746263	0	0.0695567	-0.188
Ercc3	NP_598419	NM_133658	9.26843	783	0	0	0	0	10	0	0	0	0	0	0.0447912	0	-1.547
Ercc4	NP_056584	NM_015769	3.1912	917	0	0	0	0	0	20	0	0	0	0	0	0.0506694	-2.228
Ergic1	NP_080446	NM_026170	21.1919	290	0	0	70	30	80	90	0	0	1.05134	0.38677	0.967489	0.720991	-1.013
Ergic3	NP_079792	NM_025516	54.2187	383	0	0	0	0	20	0	0	0	0	0	0.183141	0	-2.264
Erh	NP_031977	NM_007951	44.4541	104	0	55	50	20	130	170	0	2.23603	2.09402	0.718996	4.38393	3.79753	-1.369
Erlec1	NP_080021	NM_025745	19.0929	483	50	25	0	0	30	0	0.348701	0.218847	0	0	0.217835	0	0.42
Erlin1	NP_001157832	NM_001164360	1.95986	348	130	0	0	0	0	0	1.25833	0	0	0	0	0	3.926
Erlin2	NP_705820	NM_153592	14.0072	340	135	80	80	80	140	180	1.33747	0.994855	1.02484	0.879713	1.44412	1.22993	-0.341
Ermn	NP_084248	NM_029972	0.807151	281	190	190	330	460	0	0	2.2776	2.85888	5.11508	6.12042	0	0	6.116
Ermp1	NP_001074682	NM_001081213	4.57446	898	0	0	0	0	0	40	0	0	0	0	0	0.103483	-2.902
Ero1l	NP_056589	NM_015774	7.38631	464	0	0	0	0	30	20	0	0	0	0	0.226755	0.100138	-3.097
Erp29	NP_080405	NM_026129	17.8431	262	95	100	40	50	100	140	1.22139	1.61379	0.664973	0.713507	1.33861	1.2414	-0.328
Erp44	NP_083848	NM_029572	12.9019	406	60	20	40	70	50	60	0.497801	0.208282	0.42912	0.644617	0.431915	0.343329	0.052
Esam	NP_081378	NM_027102	4.06546	394	0	0	0	0	10	0	0	0	0	0	0.0890139	0	-1.542
Esco1	NP_001074691	NM_001081222	7.77099	843	0	0	30	0	0	0	0	0	0.155003	0	0	0	2.561
Esd	NP_058599	NM_016903	19.0104	282	0	5	0	110	10	60	0	0.0749669	0	1.45839	0.124367	0.494296	0.017
Espn	NP_997571	NM_207688	0.490669	533	0	20	50	10	0	0	0	0.158654	0.40859	0.0701459	0	0	3.466
Espn	NP_997570	NM_207687	0.78065	871	0	0	0	10	0	0	0	0	0	0.0429251	0	0	1.59
Espn	NP_997572	NM_207689	3e-06	452	0	0	0	10	0	0	0	0	0	0.0827163	0	0	1.585
Espn	NP_997573	NM_207690	0.423627	443	0	0	0	10	0	0	0	0	0	0.0843968	0	0	1.587
Espn	NP_997574	NM_207691	4.8072	524	0	0	0	10	0	0	0	0	0	0.0713507	0	0	1.61
Esrrb	NP_036064	NM_011934	31.7791	454	0	0	0	0	5	5	0	0	0	0	0.038625	0.0255858	-1.45
Esrrb	NP_001152972	NM_001159500	2.9e-05	438	0	0	0	0	5	5	0	0	0	0	0.0400359	0.0265205	-1.459
Esyt1	NP_035973	NM_011843	2.13016	1092	0	0	0	0	40	30	0	0	0	0	0.128467	0.063824	-3.424
Esyt2	NP_083007	NM_028731	6.71099	845	0	0	50	0	10	20	0	0	0.257726	0	0.0415047	0.0549868	0.074
Etf1	NP_659115	NM_144866	18.8988	437	0	0	0	30	40	40	0	0	0	0.256667	0.32102	0.212649	-1.393
Etfa	NP_663590	NM_145615	12.6031	333	170	200	70	50	90	110	1.71963	2.53942	0.915586	0.561378	0.947878	0.767421	0.401
Etfb	NP_080971	NM_026695	11.3587	255	190	165	180	60	150	130	2.50983	2.73585	3.07452	0.879713	2.06303	1.18437	0.257
Etfdh	NP_080070	NM_025794	6.30253	616	110	80	120	30	40	70	0.60151	0.549108	0.848488	0.182083	0.227737	0.263999	0.632
Ethe1	NP_075643	NM_023154	1.96547	254	0	0	0	0	20	10	0	0	0	0	0.276153	0.0914643	-2.589
Etl4	NP_001171101	NM_001177630	0.594499	1347	0	0	0	0	15	2	0	0	0	0	0.0390551	0.00344943	-2.019
Etl4	NP_001074475	NM_001081006	1.25756	1997	0	0	0	0	35	2	0	0	0	0	0.0614673	0.00232668	-2.76
Etl4	NP_001171102	NM_001177631	9e-06	1911	0	0	0	0	0	2	0	0	0	0	0	0.00243139	-0.121
Etl4	NP_084171	NM_029895	3.2e-05	1341	0	0	0	0	0	2	0	0	0	0	0	0.00346487	-0.116
Etl4	NP_835160	NM_178059	0.05057	1352	0	0	0	0	0	2	0	0	0	0	0	0.00343668	-0.13
Evl	NP_001156868	NM_001163396	4.17973	401	0	0	0	0	20	0	0	0	0	0	0.17492	0	-2.247
Ewsr1	NP_031994	NM_007968	84.0367	655	0	0	0	0	100	130	0	0	0	0	0.535442	0.461092	-4.559
Exoc1	NP_081546	NM_027270	8.80731	901	0	0	0	0	0	10	0	0	0	0	0	0.0257846	-1.561
Exoc2	NP_079864	NM_025588	7.90095	924	0	0	0	10	0	0	0	0	0	0.040463	0	0	1.605
Exoc3	NP_796307	NM_177333	20.4323	755	0	0	0	20	10	0	0	0	0	0.0990405	0.0464523	0	0.26
Exoc4	NP_033174	NM_009148	12.7279	975	0	0	20	20	0	60	0	0	0.0893451	0.0766929	0	0.142966	-0.872
Exoc5	NP_997097	NM_207214	11.3829	708	0	0	90	10	0	0	0	0	0.553674	0.0528076	0	0	3.661
Exoc7	NP_001156344	NM_001162872	3.88413	653	0	0	0	0	0	20	0	0	0	0	0	0.0711545	-2.223
Exoc7	NP_058553	NM_016857	10.7101	697	0	0	0	10	0	20	0	0	0	0.053641	0	0.0666627	-0.985
Exog	NP_001165607	NM_001172136	1.08271	392	30	12	0	0	0	0	0.25779	0.129433	0	0	0	0	2.847
Exosc1	NP_079920	NM_025644	6.09789	195	0	0	0	0	10	20	0	0	0	0	0.179854	0.238276	-2.597
Exosc10	NP_057908	NM_016699	18.3521	887	0	0	0	0	100	0	0	0	0	0	0.395394	0	-3.823
Exosc2	NP_659135	NM_144886	14.4002	293	0	0	0	0	10	0	0	0	0	0	0.119698	0	-1.561
Exosc4	NP_780608	NM_175399	8.35373	245	0	0	0	0	10	40	0	0	0	0	0.143149	0.379297	-3.129
Exosc5	NP_613052	NM_138586	4.97051	235	0	0	0	0	20	10	0	0	0	0	0.298481	0.0988593	-2.579
Exosc6	NP_082550	NM_028274	2.96089	273	0	0	0	0	20	10	0	0	0	0	0.256934	0.0850987	-2.608
Exosc8	NP_081424	NM_027148	8.3347	276	0	0	0	0	20	10	0	0	0	0	0.254141	0.0841737	-2.582
Exosc8	NP_001157042	NM_001163570	0.430143	280	0	0	0	0	0	10	0	0	0	0	0	0.0829712	-1.552
Exosc9	NP_062266	NM_019393	7.50394	438	0	0	0	0	10	20	0	0	0	0	0.0800719	0.106082	-2.612
Extl2	NP_001156987	NM_001163515	0.531007	316	77	0	20	0	0	0	0.820794	0	0.275669	0	0	0	3.655
Extl2	NP_067363	NM_021388	6.82834	330	77	0	20	0	0	0	0.785973	0	0.263974	0	0	0	3.649
Ezh1	NP_031996	NM_007970	9.60317	750	0	0	0	0	10	0	0	0	0	0	0.046762	0	-1.553
Ezr	NP_033536	NM_009510	5.86463	586	900	854	1406	1691	107	143.1	5.1734	6.16182	10.4504	10.7889	0.640384	0.567319	2.467
F3	NP_034301	NM_010171	1.60644	294	0	25	40	100	0	0	0	0.359535	0.592595	1.27169	0	0	4.183
F8a	NP_032004	NM_007978	2.91287	381	0	0	0	0	0	10	0	0	0	0	0	0.0609762	-1.557
Fabp12	NP_083586	NM_029310	26.2096	132	0	40	10	20	0	0	0	1.28125	0.329968	0.566482	0	0	3.31
Fabp3	NP_034304	NM_010174	31.8567	133	0	25	0	30	30	50	0	0.794762	0	0.843334	0.791086	0.873381	-0.835
Fabp5	NP_034764	NM_010634	33.9819	135	80	125	30	50	0	90	1.99612	3.91494	0.967905	1.38473	0	1.5488	0.643
Fabp7	NP_067247	NM_021272	21.1276	132	80	125	70	160	20	60	2.04149	4.00391	2.30977	4.53185	0.531386	1.056	1.199
Fads2	NP_062673	NM_019699	36.5106	444	0	0	0	0	10	0	0	0	0	0	0.0789898	0	-1.551
Faf1	NP_032009	NM_007983	9.81012	649	0	25	0	0	20	10	0	0.162871	0	0	0.108079	0.0357965	-0.563
Faf2	NP_848484	NM_178397	11.4282	445	30	20	20	0	50	80	0.227087	0.190028	0.195756	0	0.394062	0.417653	-1.104
Fah	NP_034306	NM_010176	3.1799	419	0	0	0	30	0	0	0	0	0	0.267693	0	0	2.535
Fahd1	NP_075969	NM_023480	4.85008	227	0	0	0	0	0	20	0	0	0	0	0	0.204687	-2.212
Fahd2a	NP_083905	NM_029629	5.50568	313	50	45	40	0	20	20	0.538092	0.607879	0.556623	0	0.224099	0.148447	0.732
Faim	NP_035940	NM_011810	7.42685	179	45	90	70	110	0	0	0.846818	2.12588	1.7033	2.29757	0	0	4.805
Faim	NP_001116323	NM_001122851	10.4654	201	45	90	70	110	0	0	0.754132	1.89319	1.51687	2.0461	0	0	4.783
Fam107b	NP_079902	NM_025626	25.3967	131	0	0	0	20	0	0	0	0	0	0.570806	0	0	2.194
Fam114a2	NP_001162139	NM_001168668	1.04518	497	20	0	0	15	0	20	0.135552	0	0	0.11284	0	0.0934887	0.085
Fam114a2	NP_080618	NM_026342	19.3233	490	20	0	0	15	0	20	0.137488	0	0	0.114452	0	0.0948242	0.083
Fam120a	NP_001028440	NM_001033268	34.9797	1112	0	235	150	190	70	190	0	0.893535	0.587532	0.63882	0.220774	0.396949	0.297
Fam120c	NP_932773	NM_198105	7.81928	1091	50	140	90	260	110	200	0.154375	0.542565	0.359305	0.891001	0.353608	0.425883	0.057
Fam123a	NP_001158177	NM_001164705	29.8045	509	0	0	0	0	0	40	0	0	0	0	0	0.182569	-2.922
Fam123a	NP_082389	NM_028113	5.06902	635	0	0	0	0	0	40	0	0	0	0	0	0.146343	-2.927
Fam125b	NP_780393	NM_175184	13.2162	317	0	0	0	20	0	0	0	0	0	0.235885	0	0	2.174
Fam129a	NP_071301	NM_022018	3.3127	926	20	0	0	170	40	260	0.0727528	0	0	0.686385	0.151497	0.652301	-0.943
Fam129b	NP_666231	NM_146119	5.04751	749	0	0	0	0	0	50	0	0	0	0	0	0.155086	-3.149
Fam134a	NP_739561	NM_170755	27.6228	541	0	0	0	0	10	30	0	0	0	0	0.0648271	0.128828	-2.84
Fam136a	NP_079867	NM_025591	9.17709	138	0	82	15	5	0	5	0	2.51237	0.473432	0.135463	0	0.0841737	2.417
Fam161a	NP_082948	NM_028672	61.3521	475	50	0	20	0	0	0	0.354574	0	0.183392	0	0	0	3.32
Fam162a	NP_081618	NM_027342	29.3232	155	0	65	0	0	0	0	0	1.77309	0	0	0	0	3.258
Fam164a	NP_775273	NM_173181	11.4137	324	0	0	0	10	0	20	0	0	0	0.115394	0	0.143407	-0.99
Fam168a	NP_848879	NM_178764	30.5218	235	0	40	30	0	0	0	0	0.719682	0.55603	0	0	0	3.333
Fam169a	NP_001093928	NM_001100458	18.7613	665	0	0	0	0	150	330	0	0	0	0	0.791086	1.15286	-5.34
Fam192a	NP_082497	NM_028221	22.0374	254	0	0	0	0	0	10	0	0	0	0	0	0.0914643	-1.565
Fam193a	NP_001230052	NM_001243123	18.0372	1518	0	0	0	20	0	0	0	0	0	0.0492593	0	0	2.198
Fam20b	NP_663388	NM_145413	9.73334	409	15	0	0	0	0	20	0.123537	0	0	0	0	0.113604	-0.647
Fam36a	NP_079787	NM_025511	80.2505	117	15	0	0	0	0	0	0.431853	0	0	0	0	0	1.92
Fam3a	NP_079749	NM_025473	8.71251	230	85	40	20	10	10	10	1.24486	0.735328	0.378745	0.162556	0.152485	0.101008	1.568
Fam3c	NP_613053	NM_138587	30.2371	227	345	140	120	30	30	0	5.11946	2.60766	2.3025	0.494112	0.4635	0	2.532
Fam40a	NP_705791	NM_153563	14.8062	837	0	4	0	0	20	40	0	0.0202061	0	0	0.0838028	0.111025	-2.692
Fam40b	NP_001032829	NM_001037740	0.1268	816	0	9	0	0	0	0	0	0.0466338	0	0	0	0	1.528
Fam40b	NP_796178	NM_177204	9.61151	844	0	9	0	0	0	0	0	0.0450867	0	0	0	0	1.529
Fam49b	NP_659095	NM_144846	17.5041	324	0	0	0	20	40	100	0	0	0	0.230789	0.432981	0.717035	-2.316
Fam57b	NP_084254	NM_029978	68.812	275	11	40	40	3.3	6	0	0.134738	0.615001	0.633538	0.0448653	0.0765196	0	2.165
Fam57b	NP_001139819	NM_001146347	51.9435	225	6	0	0	3.3	6	0	0.0898255	0	0	0.0548354	0.0935239	0	0.025
Fam57b	NP_081160	NM_026884	75.5055	275	11	0	0	3.3	6	20	0.134738	0	0	0.0448653	0.0765196	0.16896	-0.986
Fam63a	NP_955769	NM_199475	5.98337	468	25	7	10	10	0	0	0.179939	0.0632413	0.0930678	0.0798884	0	0	2.995
Fam63a	NP_598619	NM_133858	1.79254	459	25	7	10	10	0	0	0.183467	0.0644813	0.0948926	0.0814549	0	0	2.983
Fam63b	NP_766360	NM_172772	8.4229	601	0	5	0	0	0	20	0	0.0351758	0	0	0	0.0773109	-1.491
Fam71b	NP_001013805	NM_001013783	0.028273	665	20	0	0	0	0	0	0.101307	0	0	0	0	0	2.155
Fam82a2	NP_001028308	NM_001033136	13.3402	470	70	0	0	0	0	0	0.501685	0	0	0	0	0	3.361
Fam82b	NP_079752	NM_025476	5.10375	305	0	85	0	0	50	40	0	1.17833	0	0	0.574942	0.304681	-0.52
Fam96a	NP_080911	NM_026635	16.8932	160	0	0	0	10	0	0	0	0	0	0.233674	0	0	1.603
Fam98a	NP_598508	NM_133747	13.1079	515	0	0	0	0	10	0	0	0	0	0	0.0681	0	-1.55
Fam98b	NP_080896	NM_026620	19.6126	429	0	0	0	0	0	50	0	0	0	0	0	0.270768	-3.188
Fap	NP_032012	NM_007986	0.973284	761	0	265	190	550	0	0	0	1.47235	1.08746	2.70214	0	0	5.938
Far1	NP_080419	NM_026143	0.391038	515	0	0	0	0	0	20	0	0	0	0	0	0.0902211	-2.238
Farp1	NP_598843	NM_134082	4.38849	1048	0	0	70	40	180	150	0	0	0.290926	0.142701	0.602373	0.332518	-1.58
Farp2	NP_663494	NM_145519	5.43598	1065	0	0	0	0	40	50	0	0	0	0	0.131724	0.10907	-3.727
Farsa	NP_079924	NM_025648	13.237	508	0	5	0	0	30	70	0	0.0416155	0	0	0.207115	0.320125	-3.049
Farsb	NP_035941	NM_011811	18.5256	589	70	65	0	50	170	220	0.400326	0.466602	0	0.317384	1.01225	0.867746	-1.241
Fasn	NP_032014	NM_007988	13.2668	2504	225	340	200	460	300	930	0.302677	0.574108	0.347889	0.686836	0.420185	0.862847	-0.503
Fat1	NP_001074755	NM_001081286	2.81299	4590	140	0	0	0	0	0	0.102742	0	0	0	0	0	3.997
Fat3	NP_001074283	NM_001080814	5.25234	4551	0	0	0	0	10	0	0	0	0	0	0.00770632	0	-1.554
Fat4	NP_899044	NM_183221	2.67853	4981	0	0	0	0	10	0	0	0	0	0	0.00704105	0	-1.548
Fau	NP_001153711	NM_001160239	17.3832	133	65	50	50	60	0	0	1.64624	1.58952	1.63743	1.68667	0	0	4.462
Fbll1	NP_001004147	NM_001004147	5.62054	314	0	0	0	5	65	40	0	0	0	0.0595347	0.726002	0.295948	-3.118
Fbn1	NP_032019	NM_007993	3.04638	2873	0	0	0	0	10	0	0	0	0	0	0.0122073	0	-1.545
Fbxl17	NP_056609	NM_015794	2.99415	701	10	0	0	0	0	0	0.0480521	0	0	0	0	0	1.602
Fbxl20	NP_082425	NM_028149	9.01099	436	35	0	30	0	10	0	0.270404	0	0.299695	0	0.0804392	0	1.34
Fbxo2	NP_789818	NM_176848	7.38266	297	20	0	0	0	20	0	0.226832	0	0	0	0.236172	0	-0.399
Fbxo22	NP_082325	NM_028049	9.96251	402	0	0	0	0	0	10	0	0	0	0	0	0.0577909	-1.572
Fbxo41	NP_001001160	NM_001001160	3.02052	873	10	0	0	0	0	0	0.0385848	0	0	0	0	0	1.588
Fbxo6	NP_056612	NM_015797	0.565434	295	0	0	0	20	10	0	0	0	0	0.253477	0.118886	0	0.269
Fbxw11	NP_598776	NM_134015	15.0145	563	0	0	6	0	0	0	0	0	0.0464182	0	0	0	1.223
Fcgbp	NP_001116075	NM_001122603	0.178171	2583	0	57	30	0	15	0	0	0.0933038	0.0505874	0	0.0203667	0	1.24
Fdps	NP_001240680	NM_001253751	0.480245	420	0	0	0	10	0	20	0	0	0	0.0890185	0	0.110628	-0.986
Fdps	NP_608219	NM_134469	21.2896	353	0	0	0	10	0	20	0	0	0	0.105914	0	0.131626	-0.981
Fdx1	NP_032022	NM_007996	5.88183	188	0	20	20	0	0	10	0	0.449801	0.463359	0	0	0.123574	0.877
Fdx1l	NP_001034913	NM_001039824	7.65582	174	0	10	0	0	0	0	0	0.242996	0	0	0	0	1.615
[truncated: 4,175 more rows]

## Sheet: S2
Table S2. All the mouse proteins identified in the OS and RR of retina
Gene	Human_Ortholog	RNA_FPKM	Length	P13_OS_Counts	P15_1_OS_Counts	P15_2_OS_Counts	P15_3_OS_Counts	P15_1_RR_Counts	P15_2_RR_Counts	P13_OS_Normalized	P15_1_OS_Normalized	P15_2_OS_Normalized	P15_3_OS_Normalized	P15_1_RR_Normalized	P15_2_RR_Normalized	Enrichment(OS/RR)
0610007P14Rik	C14orf1	15.1931	140	5	0	0	0	10	0	0.120302	0	0	0	0.250511	0	-0.828
0610009B22Rik	N/A	16.2302	140	0	0	0	0	0	5	0	0	0	0	0	0.0829712	-0.92
0610009D07Rik	SF3B14	36.6959	125	0	0	0	0	70	80	0	0	0	0	1.964	1.48684	-4.222
0610010K14Rik	C17orf49	5.61039	172.667	0	0	0	0	16	13.2	0	0	0	0	0.327218	0.178823	-2.56067
0610037L13Rik	C1orf123	8.12012	196	0	30	0	10	10	0	0	0.647163	0	0.190754	0.178936	0	0.878
0910001L09Rik	LAMTOR4	20.2344	99	0	45	30	10	0	0	0	1.92188	1.31987	0.377654	0	0	3.501
1110001A16Rik	N/A	4.49346	80	0	0	0	0	0	10	0	0	0	0	0	0.290399	-1.558
1110007C09Rik	C9orf89	16.668	183	60	10	0	0	10	0	1.10441	0.231046	0	0	0.191647	0	1.414
1110012J17Rik	SOGA2	13.5084	1919	0	0	0	10	20	0	0	0	0	0.0194865	0.0360632	0	-0.0325
1110021J02Rik	CCDC167	8.08203	100.5	0	0	0	0	5	0	0	0	0	0	0.174697	0	-0.906
1110037F02Rik	KIAA1429	8.17441	1861	0	0	0	0	10	30	0	0	0	0	0.0188455	0.0374507	-2.866
1110051M20Rik	C11orf49	35.2906	331	0	20	0	0	0	0	0	0.255476	0	0	0	0	2.19
1190002N15Rik	C3orf58	8.98231	430	65	10	0	0	0	0	0.509185	0.0983287	0	0	0	0	3.388
1190005F20Rik	TRMT1L	8.68468	728	0	0	10	20	0	0	0	0	0.0598293	0.102714	0	0	2.499
1200014J11Rik	C17orf85	9.97105	615	0	0	0	0	60	70	0	0	0	0	0.342161	0.264429	-4.07
1300001I01Rik	CLUH	5.09837	1353	0	0	0	0	0	30	0	0	0	0	0	0.051512	-2.648
1300018I17Rik	VPS9D1	5.80395	649	0	5	0	0	0	0	0	0.0325742	0	0	0	0	1.08
1500001M20Rik	TAMM41	4.38496	337	0	0	0	0	0	20	0	0	0	0	0	0.137875	-2.205
1500003O03Rik	CHP1	10.959	195	10	5	20	10	10	3.3	0.172741	0.108414	0.446725	0.191732	0.179854	0.0393156	0.745
1500032L24Rik	C22orf32	84.6295	107	0	0	0	0	10	0	0	0	0	0	0.327771	0	-1.566
1700037H04Rik	C20orf27	5.02097	174	0	10	0	0	0	0	0	0.242996	0	0	0	0	1.618
1700047I17Rik2	FAM177A1	11.6299	207	105	32	10	0	10	0	1.70864	0.653624	0.210414	0	0.169427	0	2.142
1810006K21Rik	TMEM258	82.7073	79	30	0	0	0	40	20	1.27916	0	0	0	1.77577	0.58815	-1.102
1810009A15Rik	C11orf98	221.956	123	10	40	0	0	0	0	0.273858	1.375	0	0	0	0	3.004
1810009N02Rik	N/A	339.873	233	10	25	0	20	0	0	0.144569	0.453662	0	0.320925	0	0	3.061
1810013D10Rik	C4orf52	7.42044	69	0	0	20	0	0	10	0	0	1.26248	0	0	0.336695	0.264
1810020D17Rik	AAMDC	4.59151	136	0	30	5	5	0	0	0	0.942666	0.161846	0.138927	0	0	2.7715
1810030N24Rik	SMIM8	15.5543	97	0	0	10	0	0	0	0	0	0.449028	0	0	0	1.581
2010012O05Rik	C10orf32	7.77998	105	0	0	10	0	0	0	0	0	0.414816	0	0	0	1.589
2010107E04Rik	C14orf2	275.88	58	25	65	30	0	30	30	1.45192	4.73843	2.25288	0	1.81404	1.20165	0.207
2010107G23Rik	C10orf35	4.39469	120	0	0	10	0	0	0	0	0	0.362964	0	0	0	1.592
2210010C04Rik	N/A	0.010508	247	166	175	100	26.6	70	0	2.26382	2.99564	1.76339	0.402638	0.993928	0	1.394
2210018M11Rik	C11orf30	17.7427	1264	95	0	0	0	10	0	0.253167	0	0	0	0.0277464	0	1.718
2310021P13Rik	ZSWIM8	5.25292	1818.33	0	0	0	6.6	0	0	0	0	0	0.0135715	0	0	1.27667
2310033P09Rik	C1orf35	7.59551	260	0	0	0	0	20	0	0	0	0	0	0.269781	0	-2.213
2310035C23Rik	KIAA1468	5.24184	1204	0	0	0	20	17.5	35	0	0	0	0.0621121	0.0506181	0.0675414	-1.3045
2310047M10Rik	C17orf59	4.53069	360	0	0	30	0	0	0	0	0	0.362964	0	0	0	2.555
2310061I04Rik	C6orf136	17.8083	315	0	30	0	0	0	0	0	0.402679	0	0	0	0	2.51
2400003C14Rik	IST1	27.1379	362	0	0	0	70	0	30	0	0	0	0.722968	0	0.19253	0.37
2410002F23Rik	N/A	15.8142	284	30	0	0	0	0	0	0.355823	0	0	0	0	0	2.544
2410016O06Rik	C14orf169	1.588	603	0	0	0	0	0	10	0	0	0	0	0	0.0385273	-1.548
2510003E04Rik	KIAA1279	26.8909	617	0	0	0	60	0	0	0	0	0	0.363577	0	0	3.178
2610002M06Rik	CHMP1B	5.38917	199	0	7	0	0	0	10	0	0.148728	0	0	0	0.116743	-0.588
2610018G03Rik	MST4	0.382087	416	10	0	0	0	0	0	0.0809725	0	0	0	0	0	1.6
2610027L16Rik	NOP9	1.90143	636	0	0	0	0	0	10	0	0	0	0	0	0.0365282	-1.566
2610034B18Rik	C15orf38	7.74906	226	0	35	0	0	0	10	0	0.654799	0	0	0	0.102796	0.784
2610034M16Rik	N/A	7.71129	1238	0	0	0	30	0	0	0	0	0	0.0906005	0	0	2.531
2610301G19Rik	KIAA1967	17.3163	922	0	20	50	50	360	440	0	0.0917166	0.236202	0.202754	1.36939	1.10868	-2.394
2700060E02Rik	C14orf166	37.2594	244	0	0	0	0	30	80	0	0	0	0	0.431207	0.761703	-3.916
2700094K13Rik	C11orf31	8.87404	116	0	0	0	0	0	50	0	0	0	0	0	1.00138	-3.118
2810405K02Rik	FAM213B	8.46974	201	35	0	20	20	40	0	0.586547	0	0.43339	0.372018	0.69794	0	0.124
2810407C02Rik	SELT	53.0964	195	0	20	0	10	40	40	0	0.433655	0	0.191732	0.719415	0.476552	-1.42
2810408M09Rik	TP53RK	2.9635	244	0	0	0	0	0	10	0	0	0	0	0	0.0952128	-1.562
2900010M23Rik	MNF1	38.8292	136	0	35	20	0	10	0	0	1.08812	0.640525	0	0.257878	0	1.189
3830431G21Rik	PLEKHD1	7.29305	505	0	0	0	10	0	0	0	0	0	0.0740352	0	0	1.61
4632415K11Rik	KIAA1609	14.4743	455	70	10	0	0	10	0	0.518224	0.092926	0	0	0.0770802	0	1.543
4732456N10Rik	N/A	0.007649	538	0	0	0	0	0	23.1	0	0	0	0	0	0.0997505	-2.357
4930485B16Rik	CFAP54	0.708511	2458	0	0	0	0	0	10	0	0	0	0	0	0.00945156	-1.55
4930506M07Rik	KIAA1598	3.89319	543.5	0	0	10	5	0	0	0	0	0.0955169	0.0296258	0	0	1.9055
4930572J05Rik	THEM6	5.51133	207	0	0	10	0	10	10	0	0	0.210414	0	0.169427	0.112232	-0.932
4931406C07Rik	C11orf54	5.87401	315	10	0	0	10	0	0	0.106935	0	0	0.118691	0	0	2.14
4932438A13Rik	KIAA1109	17.263	5005	195	0	0	0	0	0	0.131239	0	0	0	0	0	4.333
4933405O20Rik	N/A	0.028825	396	0	0	10	0	0	0	0	0	0.109989	0	0	0	1.604
4933407C03Rik	CMIP	8.0274	729	0	0	0	0	0	5	0	0	0	0	0	0.0159924	-0.907
4933427D14Rik	KIAA0753	4.082	959	60	0	0	0	0	0	0.210748	0	0	0	0	0	3.202
5033414D02Rik	PLGRKT	12.8403	147	35	40	20	10	20	20	0.802013	1.15051	0.592595	0.254339	0.477163	0.316081	0.473
5730419I09Rik	C2CD5	4.26397	1003	0	0	0	16.5	20	16.5	0	0	0	0.0615157	0.0699449	0.0382245	-1.1305
5730469M10Rik	FAM213A	21.3899	218	85	25	60	0	100	130	1.31339	0.484878	1.19878	0	1.60878	1.38539	-0.795
5730494N06Rik	TMEM230	27.4482	120	15	25	30	0	40	10	0.421057	0.880861	1.08889	0	1.16905	0.193599	-0.141
5830418K08Rik	KIAA1731	6.55539	2380	0	0	0	0	0	50	0	0	0	0	0	0.0488066	-3.098
6330407J23Rik	SOGA3	8.63397	945	0	30	40	10	60	60	0	0.134226	0.184363	0.0395638	0.222676	0.147504	-0.897
6430527G18Rik	IRF2BPL	5.10389	775	0	0	0	0	10	0	0	0	0	0	0.0452535	0	-1.568
6430548M08Rik	KIAA0513	12.2589	402	2.5	34.5	10	30	25	80	0.0206908	0.362591	0.108364	0.279057	0.21814	0.462399	-0.8045
6430571L13Rik	C3orf18	8.24907	164	35	0	0	0	0	0	0.718878	0	0	0	0	0	2.681
6430704M03Rik	FRRS1L	5.94492	293	0	0	0	0	0	10	0	0	0	0	0	0.0792899	-1.555
8430419L09Rik	KIAA1467	9.59789	624	0	0	50	0	0	0	0	0	0.349004	0	0	0	3.003
8430427H17Rik	C20orf112	13.8857	557	0	0	0	0	0	10	0	0	0	0	0	0.0438108	-1.547
9030624J02Rik	C16orf62	9.39738	991	0	0	0	0	0	40	0	0	0	0	0	0.0937717	-2.883
9330182L06Rik	KIAA1324L	3.68544	1028	0	35	50	0	0	0	0	0.143954	0.211847	0	0	0	3.512
9430016H08Rik	C2orf47	7.52165	291	0	0	20	0	0	20	0	0	0.299352	0	0	0.15967	-0.402
9530053A07Rik	FCGBP	0.027668	2581	55	47	30	0	15	50	0.0717803	0.0769943	0.0506266	0	0.0203825	0.0450057	0.221
9630033F20Rik	C12orf5	8.38002	269	0	15	0	10	0	0	0	0.23577	0	0.138988	0	0	2.347
A130022J15Rik	EOGT	4.67919	527	0	0	0	0	0	20	0	0	0	0	0	0.0881667	-2.213
A230046K03Rik	KIAA1033	10.26	1173	0	0	0	0	0	70	0	0	0	0	0	0.138639	-3.429
A2ld1	GGACT	8.58404	149	0	0	0	10	0	0	0	0	0	0.250925	0	0	1.594
A2m	A2M	1.92288	1474	0	45	0	20	0	0	0	0.129081	0	0.0507297	0	0	3.266
A330021E22Rik	C7orf63	5.36782	942	0	0	0	0	10	0	0	0	0	0	0.0372309	0	-1.542
A430005L14Rik	C1orf174	6.80323	230	0	0	0	0	10	0	0	0	0	0	0.152485	0	-1.556
Aaas	AAAS	5.66869	546	0	0	0	0	20	0	0	0	0	0	0.128467	0	-2.229
Aak1	AAK1	8.57376	918.5	0	67	65	30	45	70	0	0.309022	0.305691	0.116959	0.17216	0.177398	-0.1845
Aars	AARS	24.9883	968	190	170	170	200	130	380	0.661164	0.742544	0.764925	0.772475	0.471001	0.911997	-0.143
Aars2	AARS2	4.26984	980	5	30	0	0	20	0	0.017186	0.129433	0	0	0.0715744	0	0.083
Aarsd1	AARSD1	12.9148	412	0	20	0	50	10	20	0	0.205249	0	0.453735	0.0851249	0.112776	0.39
Abat	ABAT	10.3629	472	0	40	30	0	65	95	0	0.359582	0.277815	0	0.484681	0.441407	-1.0875
Abca1	ABCA1	5.84743	2261	0	10	0	0	0	0	0	0.0187003	0	0	0	0	1.598
Abca2	ABCA2	8.85266	2433	0	60	0	0	0	0	0	0.10427	0	0	0	0	3.207
Abca4	ABCA4	85.5357	2310	370	1252	750	710	100	300	0.539536	2.29161	1.41415	1.14915	0.151825	0.301713	1.918
Abca5	ABCA5	8.03983	1642	0	5	0	0	0	0	0	0.0128749	0	0	0	0	1.106
Abca6	ABCA6	0.62489	1624	0	0	0	10	0	0	0	0	0	0.023022	0	0	1.582
Abca7	ABCA7	2.18199	2159	0	17	0	0	0	0	0	0.0332924	0	0	0	0	2.067
Abca8a	N/A	22.8301	1619	0	0	0	10	0	0	0	0	0	0.0230931	0	0	1.611
Abca8b	ABCA8	2.8916	1620	0	0	0	10	0	40	0	0	0	0.0230789	0	0.0573628	-1.6665
Abca9	ABCA9	0.466076	1623	0	0	0	10	0	0	0	0	0	0.0230362	0	0	1.612
Abcb1a	ABCB1	1.08685	1276	0	0	0	5	15	70	0	0	0	0.0146504	0.0412282	0.127448	-2.914
Abcb1b	N/A	0.289626	1276	0	0	0	0	55	0	0	0	0	0	0.15117	0	-3.226
Abcb5	ABCB5	0	1255	0	0	0	5	0	0	0	0	0	0.0148955	0	0	1.104
Abcb6	ABCB6	4.46971	842	0	15	0	0	10	10	0	0.075323	0	0	0.0416526	0.0275914	-0.609
Abcb7	ABCB7	7.47623	752	0	0	0	0	10	20	0	0	0	0	0.0466376	0.0617871	-2.583
Abcb8	ABCB8	6.33873	717	0	0	0	0	0	10	0	0	0	0	0	0.0324016	-1.551
Abcc1	ABCC1	5.22716	1528	0	30	0	50	0	20	0	0.0830131	0	0.122342	0	0.0304083	0.883
Abcc4	ABCC4	0.244895	1285.67	0	0	0	6.66667	0	9.9	0	0	0	0.0199402	0	0.0178994	-0.929667
Abcc8	ABCC8	2.3205	1588	0	0	0	10	0	0	0	0	0	0.0235439	0	0	1.574
Abcd3	ABCD3	15.0348	659	0	0	0	0	20	50	0	0	0	0	0.106438	0.176267	-3.428
Abce1	ABCE1	26.2762	599	30	0	0	0	10	30	0.168704	0	0	0	0.05855	0.116354	-0.691
Abcf1	ABCF1	27.1212	837	45	0	50	0	60	0	0.1811	0	0.260189	0	0.251408	0	-0.035
Abcf2	ABCF2	10.1514	627.5	0	0	0	5	15	30	0	0	0	0.0297911	0.0838363	0.111069	-2.271
Abcf3	ABCF3	9.49798	709	0	0	20	10	0	0	0	0	0.122865	0.0527331	0	0	2.522
Abcg2	ABCG2	5.99875	657	0	0	0	40	0	20	0	0	0	0.227627	0	0.0707213	0.227
Abhd10	ABHD10	8.61431	297	0	60	50	10	50	30	0	0.854168	0.733261	0.125885	0.590429	0.234666	-0.084
Abhd12	ABHD12	27.1787	398	25	30	40	0	70	110	0.211586	0.318704	0.437746	0	0.616835	0.642089	-1.127
Abhd13	ABHD13	1.49144	337	5	0	10	0	0	0	0.0499771	0	0.129245	0	0	0	1.892
Abhd14b	ABHD14B	45.3951	210	80	35	40	60	30	30	1.28322	0.704689	0.829633	1.06822	0.501021	0.331885	0.782
Abhd16a	ABHD16A	15.4452	558	0	0	0	0	70	60	0	0	0	0	0.439965	0.249806	-4.151
Abhd4	ABHD4	7.18048	336.5	0	0	0	10	0	0	0	0	0	0.111445	0	0	1.607
Abhd6	ABHD6	6.96005	336	0	0	0	0	20	0	0	0	0	0	0.208759	0	-2.243
Abhd8	ABHD8	37.2099	439	65	0	0	0	0	0	0.498746	0	0	0	0	0	3.244
Abi1	ABI1	3.56195	453.2	0	0	0	4	0	3.2	0	0	0	0.033214	0	0.0165108	0.079
Abi2	ABI2	6.18317	471	0	0	0	9.9	0	17.7667	0	0	0	0.0787024	0	0.0882121	-0.863333
Ablim1	ABLIM1	8.6756	702.333	0	0	0	0	33.3333	16.5	0	0	0	0	0.151273	0.0565131	-2.92367
Abr	ABR	6.03023	847.667	0	0	0	6.6	0	17.4	0	0	0	0.0291362	0	0.0477303	-1.16133
Acaa1a	ACAA1	9.62035	424	0	0	0	50	15	80	0	0	0	0.440894	0.124074	0.438338	-1.089
Acaa1b	ACAA1	3.18226	424	55	0	0	0	15	0	0.436946	0	0	0	0.124074	0	0.816
Acaa2	ACAA2	4.33763	397	0	60	30	30	50	70	0	0.639013	0.329136	0.282527	0.441706	0.409631	-0.491
Acaca	ACACA	9.48014	2345	0	75	80	0	50	320	0	0.135228	0.148591	0	0.0747793	0.317024	-1.359
Acad11	ACAD11	6.08711	779	0	0	0	0	20	10	0	0	0	0	0.0900423	0.0298228	-2.603
Acad12	ACAD10	1.01545	555	0	15	0	0	0	0	0	0.114274	0	0	0	0	1.932
Acad8	ACAD8	7.54826	413	295	145	90	0	80	100	2.40604	1.48445	0.949156	0	0.679351	0.562517	0.584
Acad9	ACAD9	9.63522	625	245	165	190	120	130	200	1.32043	1.11623	1.32409	0.717846	0.729487	0.743422	0.283
Acadl	ACADL	5.52074	430	0	55	30	10	80	100	0	0.540808	0.303877	0.0869483	0.652493	0.540278	-1.13
Acadm	ACADM	16.8225	421	225	185	140	40	110	130	1.80024	1.85797	1.44841	0.355228	0.916357	0.717376	0.402
Acads	ACADS	1.11054	412	20	15	0	0	20	10	0.163517	0.153937	0	0	0.17025	0.0563882	-0.282
Acadsb	ACADSB	12.2666	432	0	60	50	0	50	60	0	0.587241	0.504117	0	0.40592	0.322666	-0.482
Acadvl	ACADVL	28.5242	656	520	195	180	50	50	160	2.67012	1.25684	1.19513	0.284968	0.267313	0.566633	1.008
Acap2	ACAP2	7.52357	770	0	0	0	0	0	10	0	0	0	0	0	0.0301713	-1.539
Acat1	ACAT1	32.8791	424	967	380	170	170	180	250	7.6823	3.78936	1.74634	1.49904	1.48888	1.36981	0.868
Acat2	ACAT2	8.34996	397	0	0	10	40	10	20	0	0	0.109712	0.376703	0.0883412	0.117037	0.061
Acat3	ACAT2	11.4474	397	0	0	0	0	10	20	0	0	0	0	0.0883412	0.117037	-2.581
Acbd3	ACBD3	12.7242	525	0	0	0	0	10	70	0	0	0	0	0.0668028	0.309759	-3.596
Acbd5	ACBD5	4.51261	490.5	0	0	0	0	0	2.5	0	0	0	0	0	0.0118569	-0.3095
Acbd6	ACBD6	3.33875	186	0	0	0	0	0	3.3	0	0	0	0	0	0.0461005	-0.549333
Accn4	ASIC4	8.69574	539	0	0	0	0	10	20	0	0	0	0	0.0650677	0.0862038	-2.58
Ace	ACE	3.59238	1312	0	0	60	60	30	30	0	0	0.199188	0.170981	0.0801939	0.0531218	0.214
Ache	ACHE	6.5747	614	0	5	0	20	0	30	0	0.0344311	0	0.121784	0	0.113511	-0.638
Acin1	ACIN1	6.04021	832.667	0	7.33333	20.6667	0	66.6667	76.6667	0	0.0232785	0.11107	0	0.175536	0.13372	0.456833
Acly	ACLY	22.0264	1096	32	97	120	100	160	370	0.0983511	0.374213	0.476897	0.341137	0.512003	0.784306	-0.9185
Aco1	ACO1	9.27185	889	200	70	140	390	90	290	0.757808	0.332924	0.685917	1.64018	0.355054	0.757847	0.246
Aco2	ACO2	84.9202	780	1115	850	780	530	710	860	4.81516	4.60758	4.35557	2.54045	3.1924	2.56147	0.236
Acot1	N/A	1.25795	419	77	15	25	35	7	0	0.619024	0.151365	0.259879	0.312309	0.058592	0	2.501
Acot10	ACOT9	0.337077	439	0	0	0	0	20	0	0	0	0	0	0.159779	0	-2.225
Acot11	ACOT11	1.7678	594	0	0	0	20	0	0	0	0	0	0.125885	0	0	2.188
Acot13	ACOT13	25.2076	140	50	90	0	0	20	30	1.20302	2.71809	0	0	0.501021	0.497827	0.553
Acot2	ACOT2	1.46488	453	0	25	15	25	7	20	0	0.233341	0.144224	0.206334	0.0541943	0.102569	0.409
Acot3	ACOT1	0.079979	432	0	0	0	0	2	0	0	0	0	0	0.0162368	0	-0.131
Acot4	ACOT4	0.096421	421	0	0	0	0	2	0	0	0	0	0	0.016661	0	-0.137
Acot5	N/A	0.085019	421	0	0	0	0	10	0	0	0	0	0	0.0833052	0	-1.568
Acot6	ACOT6	0.818361	419	72	0	0	0	2	0	0.578828	0	0	0	0.0167406	0	2.878
Acot7	ACOT7	18.3171	371	52.6667	11	19.3333	16.5667	20	46.5	0.48006	0.126238	0.225966	0.168212	0.182664	0.293497	-0.0333333
Acot9	ACOT9	2.85475	439	0	0	0	0	20	20	0	0	0	0	0.159779	0.10584	-2.885
Acox1	ACOX1	30.4044	661	0	0	0	0	90	60	0	0	0	0	0.477524	0.21088	-4.219
Acp1	ACP1	8.78238	158	35	0	0	15	0	0	0.746177	0	0	0.354947	0	0	2.985
Acp2	ACP2	9.34605	423	0	25	40	0	40	20	0	0.24989	0.411874	0	0.331645	0.109844	-0.394
Acp6	ACP6	3.14939	418	0	5	0	0	0	10	0	0.0505758	0	0	0	0.0555788	-0.833
Acsf2	ACSF2	1.39531	615	0	20	0	0	0	30	0	0.1375	0	0	0	0.113327	-0.796
Acsf3	ACSF3	4.38702	583	0	0	20	0	10	0	0	0	0.149419	0	0.0601569	0	0.266
Acsl1	ACSL1	28.6754	699	290	140	150	100	190	250	1.3975	0.846836	0.934672	0.534875	0.953302	0.830899	-0.063
Acsl3	ACSL3	25.4322	644	27.5	17.5	50	15	75	224.95	0.128656	0.102767	0.30247	0.0883133	0.365328	0.725837	0.178
Acsl4	ACSL4	3.62205	690.5	0	0	0	0	0	14.9	0	0	0	0	0	0.0501754	-1.951
Acsl6	ACSL6	10.6556	709.5	28	10	35	30	58.5	96.25	0.132975	0.0596116	0.214929	0.158137	0.289132	0.315188	-0.9085
Acss2	ACSS2	7.83021	701	0	0	0	0	0	30	0	0	0	0	0	0.0994234	-2.64
Acta1	ACTA1	4.75253	377	551	498	0	0	0	0	4.92313	5.58517	0	0	0	0	6.004
Acta2	ACTA2	8.63725	377	164	0	0	0	0	547	1.46532	0	0	0	0	3.37079	-1.686
Actb	ACTB	381.797	375	1121	723	695	1083.7	1094	939.2	10.0694	8.15184	8.07233	10.8046	10.2315	5.81852	0.078
Actbl2	ACTBL2	0.033721	376	513	351	462	589.7	479	440.9	4.59579	3.94701	5.35179	5.86372	4.46788	2.72419	0.235
Actc1	ACTC1	3.99668	377	511	485	505	849	764	632.8	4.56573	5.43938	5.83439	8.41969	7.10732	3.89951	0.02
Actg1	ACTG1	342.637	375	0	1206	645	1083.7	996.1	939.2	0	13.5977	7.49158	10.8046	9.31592	5.81852	-0.084
Actg2	ACTG2	0.085366	376	164	0	0	0	0	0	1.46922	0	0	0	0	0	4.172
Actl6a	ACTL6A	12.1518	429	45	0	0	0	55	75	0.353334	0	0	0	0.449634	0.406153	-1.501
Actl6b	ACTL6B	16.4643	426	0	0	0	0	25	45	0	0	0	0	0.205819	0.245408	-3.442
Actn1	ACTN1	6.66849	892	132	117	130	143.3	167	258.3	0.498471	0.554587	0.634781	0.600636	0.656607	0.672736	-0.293
Actn2	ACTN2	1.06942	894	0	0	0	18.3	0	28.3	0	0	0	0.0765321	0	0.0735418	-0.826
Actn3	ACTN3	0.181513	900	0	47	0	0	0	0	0	0.220803	0	0	0	0	2.954
Actn4	ACTN4	28.0965	912	147	257	250	538.3	397	713.3	0.542942	1.19148	1.19396	2.20678	1.52669	1.81703	-0.43
Actr10	ACTR10	18.174	417	0	0	0	0	20	30	0	0	0	0	0.168209	0.167136	-3.125
Actr1a	ACTR1A	44.6556	376	25	15	60	70	65	185	0.223966	0.168676	0.695038	0.696049	0.606289	1.14306	-0.887
Actr1b	ACTR1B	19.8414	376	0	30	40	0	45	135	0	0.337351	0.463359	0	0.419738	0.834125	-1.421
Actr2	ACTR2	27.6091	394	40	35	0	130	130	160	0.341975	0.375596	0	1.23361	1.15718	0.943429	-0.846
Actr3	ACTR3	11.8543	418	80	0	50	160	130	130	0.64468	0	0.521001	1.43111	1.09074	0.722524	-0.388
Actr6	ACTR6	7.98377	396	0	0	0	0	0	10	0	0	0	0	0	0.0586665	-1.556
Acy1	ACY1	3.61049	408	0	0	0	30	0	10	0	0	0	0.27491	0	0.056941	0.634
Acyp1	ACYP1	13.606	99	30	70	30	70	20	30	1.02074	2.98959	1.31987	2.64358	0.708515	0.703998	0.894
Acyp2	ACYP2	13.6912	106	0	0	30	0	0	0	0	0	1.23271	0	0	0	2.55
Adam10	ADAM10	14.4688	749	120	20	50	120	50	30	0.539672	0.112901	0.290759	0.599003	0.234122	0.0930518	0.862
Adam17	ADAM17	4.47415	827	0	0	0	10	0	0	0	0	0	0.0452089	0	0	1.587
Adam22	ADAM22	3.66255	848.667	0	0	0	0	0	3.3	0	0	0	0	0	0.00903875	-0.542333
Adam9	ADAM9	24.568	845	0	30	0	0	0	0	0	0.150111	0	0	0	0	2.563
Adamts14	ADAMTS14	0.079386	1206	30	0	0	0	0	0	0.0837924	0	0	0	0	0	2.531
Adamts15	ADAMTS15	0.284939	950	65	0	0	0	0	0	0.230473	0	0	0	0	0	3.262
Adarb1	ADARB1	2.98863	706	0	0	0	0	10	0	0	0	0	0	0.0496788	0	-1.5555
Adck3	ADCK3	2.66388	645	0	20	0	0	0	0	0	0.131105	0	0	0	0	2.162
Adcy2	ADCY2	14.6267	1095	0	0	10	0	30	60	0	0	0.0397769	0	0.0960862	0.127298	-2.468
Adcy5	ADCY5	6.27803	1262	0	0	0	0	0	20	0	0	0	0	0	0.0368176	-2.203
Adcy6	ADCY6	17.8923	1168	0	0	0	50	0	0	0	0	0	0.16005	0	0	3.042
Adcy8	ADCY8	2.68104	1249	0	0	0	0	0	30	0	0	0	0	0	0.0558013	-2.613
Add1	ADD1	24.225	676.667	0	11	13	44.6	78	121.667	0	0.0690064	0.084011	0.247407	0.405879	0.384565	-1.204
Add2	ADD2	7.72287	725	0	0	0	35	62	195	0	0	0	0.180493	0.299922	0.624859	-2.417
Add3	ADD3	5.7003	690	0	0	0	0	80	105	0	0	0	0	0.406845	0.35372	-4.4335
Adh1	ADH1C	0.25179	375	0	0	0	10	0	0	0	0	0	0.0997008	0	0	1.596
Adh5	ADH5	22.3623	374	0	55	20	150	40	90	0	0.621784	0.232918	1.49951	0.375096	0.559057	0.053
Adh7	ADH7	0.010861	374	0	0	0	20	0	0	0	0	0	0.199935	0	0	2.182
Adipor1	ADIPOR1	82.2525	375	20	0	0	10	0	0	0.179651	0	0	0.0997008	0	0	2.507
Adk	ADK	2.08636	361	0	0	0	0	0	30	0	0	0	0	0	0.193063	-2.615
Adnp	ADNP	44.0813	1108	0	0	0	0	220	180	0	0	0	0	0.696365	0.377414	-5.283
Adpgk	ADPGK	3.03763	496	0	0	0	0	10	0	0	0	0	0	0.0707086	0	-1.543
Adprh	ADPRH	19.0125	362	0	0	0	50	0	80	0	0	0	0.516406	0	0.513413	-0.93
Adrbk1	ADRBK1	8.94437	647	0	0	0	0	10	30	0	0	0	0	0.0542063	0.107721	-2.879
Adrbk2	ADRBK2	2.35497	688	0	0	0	10	0	0	0	0	0	0.0543427	0	0	1.593
Adsl	ADSL	12.363	484	5	35	0	50	30	130	0.0347981	0.305753	0	0.386237	0.217385	0.623998	-1.065
Adss	ADSS	10.0852	456	0	0	0	0	0	20	0	0	0	0	0	0.101894	-2.213
Afap1	AFAP1	6.66226	731	0	0	0	10	0	0	0	0	0	0.0511461	0	0	1.578
Afg3l1	N/A	7.31654	789	0	0	0	0	0	20	0	0	0	0	0	0.0588896	-2.213
Afg3l2	AFG3L2	9.60497	802	90	70	60	20	120	130	0.378006	0.369039	0.325853	0.0932364	0.52476	0.376577	-0.541
Aga	AGA	1.30099	341	0	10	0	10	15	0	0	0.124019	0	0.108057	0.153552	0	-0.1985
Agap1	AGAP1	11.1757	830.5	0	1	0	15	48	23.3	0	0.00509626	0	0.0675964	0.202907	0.0652445	-1.89
Agap3	AGAP3	10.6682	652.5	0	0.5	15	0	31.5	16.65	0	0.00535207	0.0717951	0	0.121401	0.0425068	-0.619
Agbl5	AGBL5	5.98863	846	5	0	0	0	0	0	0.0199081	0	0	0	0	0	1.106
Agk	AGK	5.5782	421	35	0	10	0	50	0	0.280038	0	0.103458	0	0.416526	0	-0.577
Agl	AGL	4.58242	1532	0	0	0	30	0	70	0	0	0	0.0732137	0	0.106151	-1.272
Agpat3	AGPAT3	120.269	376	25	45	20	0	30	230	0.223966	0.506027	0.231679	0	0.279826	1.4211	-1.552
Agpat5	AGPAT5	17.6488	365	0	0	0	0	20	0	0	0	0	0	0.192172	0	-2.209
Agrn	AGRN	14.9835	2034	0	0	0	0	70	80	0	0	0	0	0.120698	0.0913744	-4.223
Ahctf1	AHCTF1	7.70523	2243	0	0	0	0	100	0	0	0	0	0	0.15636	0	-3.781
Ahcy	AHCY	8.72787	432	100	70	0	110	40	160	0.779735	0.685114	0	0.952004	0.324736	0.860442	-0.158
Ahcyl1	AHCYL1	65.912	530	21	32	0	143.1	57	169.9	0.133467	0.255284	0	1.00947	0.377184	0.744737	-0.639
Ahcyl2	AHCYL2	2.75708	577.667	29	15	13.3333	55.4	17.3333	46.6	0.170422	0.110646	0.0948152	0.338169	0.104747	0.176752	0.216333
Ahdc1	AHDC1	5.53636	1594	0	0	0	0	60	20	0	0	0	0	0.132013	0.0291492	-3.574
Ahi1	AHI1	29.7728	1047	10	45	60	10	0	0	0.0321724	0.181725	0.249603	0.0357094	0	0	3.877
Ahnak	AHNAK	0.971264	5656	0	0	0	0	0	180	0	0	0	0	0	0.0739347	-4.464
AI314180	KIAA0368	16.9702	1840	0	0	0	0	0	180	0	0	0	0	0	0.227269	-4.372
AI462493	C11orf83	30.4245	89	0	20	0	0	0	0	0	0.950142	0	0	0	0	2.163
AI480653	XXYLT1	4.58591	392	0	0	0	0	10	0	0	0	0	0	0.089468	0	-1.547
AI837181	C11orf68	7.46809	298	0	0	0	10	0	10	0	0	0	0.125462	0	0.0779595	-0.31
Aifm1	AIFM1	8.78399	612	240	195	200	60	130	150	1.32096	1.3472	1.42339	0.366547	0.744982	0.56941	0.412
Aimp1	AIMP1	17.4855	319	60	10	0	40	40	0	0.633565	0.132543	0	0.468812	0.439768	0	0.503
Aip	AIP	23.0618	330	25	15	0	0	10	10	0.255186	0.192188	0	0	0.106277	0.0703998	0.258
Aipl1	AIPL1	196.296	328	65	45	20	60	10	0	0.667529	0.580079	0.265584	0.683923	0.106925	0	2.391
Ak1	AK1	0.79572	202	14.5	12	45	30	15	35	0.243829	0.251571	0.971825	0.556136	0.260841	0.403166	0.213
Ak2	AK2	4.41345	235.5	95	65	35	10	35	35	1.35912	1.16726	0.647468	0.158794	0.521347	0.345349	0.581
Ak3	AK3	18.76	227	170	220	110	20	160	110	2.52263	4.09775	2.11063	0.329408	2.472	1.12578	0.157
Ak4	AK4	0.001843	223	35	45	50	10	30	20	0.528681	0.853211	0.976586	0.167658	0.471814	0.208358	0.536
Akap12	AKAP12	6.74235	1684	0	60	0	10	0	40	0	0.150646	0	0.0222018	0	0.0551827	0.071
Akap2	AKAP2	1.21361	856	0	0	0	3.33333	0	6.6	0	0	0	0.0139559	0	0.0179604	-0.746333
Akap5	AKAP5	29.1654	745	0	0	0	0	10	10	0	0	0	0	0.0470758	0.0311838	-2.157
Akap7	AKAP7	11.5839	314	0	0	20	0	0	0	0	0	0.277425	0	0	0	2.152
Akap8	AKAP8	24.5719	687	0	0	0	0	20	20	0	0	0	0	0.1021	0.067633	-2.867
Akap8l	AKAP8L	22.4186	641	0	0	0	0	50	30	0	0	0	0	0.273568	0.10873	-3.561
Akap9	AKAP9	16.4998	3779	75	0	100	10	0	0	0.0668521	0	0.115257	0.00989357	0	0	4.262
Akd1	AKD1	0	1879	50	0	0	0	0	0	0.0896342	0	0	0	0	0	3.033
Akna	AKNA	4.94327	1404	20	0	0	0	0	0	0.0479837	0	0	0	0	0	2.192
Akr1a1	AKR1A1	84.8967	325	165	175	100	210	120	120	1.71014	2.27669	1.34018	2.41583	1.29495	0.857794	0.499
Akr1b10	AKR1B10	1.67277	316	0	0	0	10	0	5	0	0	0	0.118316	0	0.0367594	0.334
Akr1b3	AKR1B1	3.16368	316	0	75	70	180	90	70	0	1.00351	0.964842	2.12968	0.998871	0.514631	0.214
Akr1b8	AKR1B10	0.620241	316	0	0	0	10	0	5	0	0	0	0.118316	0	0.0367594	0.328
Akr1c21	AKR1C1	0.180864	323	0	10	0	0	0	0	0	0.130902	0	0	0	0	1.6
Akr1e1	AKR1E2	19.995	301	0	35	0	50	30	60	0	0.491643	0	0.62106	0.34955	0.463095	-0.536
Akr7a5	AKR7A2	4.75012	367	110	85	40	70	0	40	1.00962	0.979268	0.474722	0.713119	0	0.253209	1.517
Akt1	AKT1	12.4245	484	0	0	0	0	0	15	0	0	0	0	0	0.0720047	-1.9435
Alad	ALAD	5.88579	330	125	25	40	60	20	30	1.27593	0.320313	0.527948	0.679778	0.212554	0.211199	1.118
Alb	ALB	0.027482	608	520	275	370	320	170	310	2.88092	1.9124	2.65059	1.96778	0.980617	1.18452	0.629
Alcam	ALCAM	4.96689	583	0	0	0	0	20	60	0	0	0	0	0.120314	0.239094	-3.54
Aldh16a1	ALDH16A1	1.83735	802	0	0	0	0	0	20	0	0	0	0	0	0.057935	-2.221
Aldh18a1	ALDH18A1	3.60051	794	32	15	0	0	0	20	0.135757	0.0798767	0	0	0	0.0585188	0.366
Aldh1a1	ALDH1A1	11.6983	501	127	60	0	150	155	266.6	0.85388	0.506363	0	1.11939	1.08505	1.23625	-0.718
Aldh1a7	ALDH1A1	3.28233	501	0	0	0	0	0	76.6	0	0	0	0	0	0.355203	-3.563
Aldh1l1	ALDH1L1	2.0307	902	15	0	0	40	40	100	0.0560164	0	0	0.1658	0.155528	0.25756	-1.397
Aldh1l2	ALDH1L2	1.32008	923	50	10	0	0	0	0	0.182473	0.0458086	0	0	0	0	3.193
Aldh2	ALDH2	8.13305	519	87	75	90	100	265	236.6	0.564654	0.611002	0.755301	0.720381	1.79074	1.05909	-0.856
Aldh3a2	ALDH3A2	9.00694	484	35	25	30	0	60	60	0.243587	0.218395	0.269973	0	0.43477	0.287999	-0.777
Aldh4a1	ALDH4A1	3.1367	562	80	0	0	0	0	80	0.479495	0	0	0	0	0.330704	-0.476
Aldh5a1	ALDH5A1	6.02998	523	0	135	180	40	120	100	0	1.09139	1.49905	0.285949	0.804699	0.444205	-0.016
Aldh6a1	ALDH6A1	7.59837	535	225	90	60	30	130	70	1.41664	0.711275	0.488475	0.209651	0.852204	0.303969	0.207
Aldh7a1	ALDH7A1	4.63766	525	0	0	0	30	45	60	0	0	0	0.219498	0.300827	0.265697	-2.4345
Aldh9a1	ALDH9A1	7.04479	518	0	35	10	90	40	80	0	0.285685	0.0840844	0.649595	0.270822	0.358794	-0.374
Aldoa	ALDOA	215.091	391	353	360	327	917.5	269	615	3.05566	4.18167	3.65236	9.42398	2.42441	3.92518	0.3555
Aldoc	ALDOC	81.9818	363	266	235	159	390	189	385	2.46834	2.73722	1.90781	4.01687	1.82604	2.46399	0.105
Alg11	ALG11	3.40359	471	0	0	0	0	10	10	0	0	0	0	0.0746101	0.0472194	-2.0565
Alg2	ALG2	31.9867	415	15	0	0	0	80	110	0.121751	0	0	0	0.676077	0.615786	-2.87
Alg3	ALG3	7.19269	438	0	0	0	0	10	0	0	0	0	0	0.0800719	0	-1.543
Alkbh5	ALKBH5	9.46864	395	0	0	0	0	20	0	0	0	0	0	0.177577	0	-2.235
Alms1	ALMS1	5.07517	3251	70	0	0	0	0	0	0.072529	0	0	0	0	0	3.353
Aloxe3	ALOXE3	0.39852	711	0	15	0	0	0	0	0	0.0892011	0	0	0	0	1.932
Alpl	ALPL	36.751	524	0	0	30	30	0	0	0	0	0.249365	0.214052	0	0	3.179
Als2	ALS2	10.5378	1651	0	0	0	0	0	40	0	0	0	0	0	0.0562857	-2.913
Alyref	ALYREF	17.7966	255	0	0	30	10	130	130	0	0	0.51242	0.146619	1.78796	1.18437	-2.329
Amacr	AMACR	2.30497	381	0	40	0	0	0	0	0	0.443898	0	0	0	0	2.809
Amdhd2	AMDHD2	3.62794	409	0	0	0	0	0	20	0	0	0	0	0	0.113604	-2.185
Amfr	AMFR	24.7717	639	0	0	0	0	10	20	0	0	0	0	0.0548849	0.0727134	-2.563
Ampd2	AMPD2	9.80626	798	0	0	20	0	0	110	0	0	0.109162	0	0	0.32024	-2.081
Amph	AMPH	63.3793	686	92	104	85	120	133	285	0.451746	0.641	0.539685	0.654014	0.679957	0.965175	-0.54
Amy2b	N/A	0.238992	453	0	0	0	20	0	0	0	0	0	0.165068	0	0	2.172
Anapc2	ANAPC2	12.8278	837	50	0	0	0	0	0	0.201222	0	0	0	0	0	2.987
Anapc4	ANAPC4	19.703	807	0	0	0	0	0	10	0	0	0	0	0	0.028788	-1.554
Anapc5	ANAPC5	12.8793	733.5	0	0	0	0	0	10	0	0	0	0	0	0.0316752	-1.5455
Ank	ANKH	15.3032	492	0	0	0	10	0	0	0	0	0	0.0759914	0	0	1.621
Ank1	ANK1	1.77837	1877.5	0	49	50	40	50	51.2	0	0.110552	0.11584	0.0796741	0.0934225	0.0633698	-0.171
Ank2	ANK2	29.1884	991.5	0	32.5	25	20	135.5	230	0	0.130871	0.103704	0.0712148	0.463061	0.522069	-2.9815
Ank3	ANK3	2.58423	1565.22	12	8.66667	3.66667	7.46667	24.8889	42.4667	0.0248306	0.021102	0.0108832	0.014918	0.0464956	0.0527216	-0.424667
Ankfy1	ANKFY1	9.239	1169	0	0	0	10	0	0	0	0	0	0.0319827	0	0	1.598
Ankhd1	ANKHD1	21.0151	2548	35	0	0	0	0	0	0.04627	0	0	0	0	0	2.674
Ankrd13a	ANKRD13A	10.9901	588	95	25	0	40	0	0	0.544223	0.179768	0	0.254339	0	0	4.11
Ankrd17	ANKRD17	11.7182	2477.5	0	44.5	15	25	0	0	0	0.0733228	0.0264386	0.0378244	0	0	3.418
Ankrd33b	ANKRD33B	20.7237	481.5	395	65	70	80	0	0	2.76356	0.570416	0.627346	0.621243	0	0	5.467
Ankrd40	ANKRD40	12.1222	343.5	0	0	0	0	0	5	0	0	0	0	0	0.0339258	-0.899
Anks1	ANKS1A	6.22405	1150	0	0	0	0	0	20	0	0	0	0	0	0.0404034	-2.242
Ano2	ANO2	28.7142	1002	0	0	0	0	0	50	0	0	0	0	0	0.115928	-3.094
Ano6	ANO6	1.90424	921.5	10	0	0	35	0	0	0.0369754	0	0	0.142023	0	0	2.8745
Ano8	ANO8	6.0526	1060	0	0	0	0	10	20	0	0	0	0	0.0330863	0.0438338	-2.576
Anp32a	ANP32A	113.885	247	35	50	40	30	155	410	0.477311	0.855897	0.705356	0.454103	2.20084	3.85631	-1.795
Anp32b	ANP32B	33.3792	272	20	0	0	0	55	150	0.247681	0	0	0	0.709166	1.28117	-2.703
Anp32e	ANP32E	54.6973	254	25	15	0	0	15	35	0.331726	0.249832	0	0	0.207231	0.320304	-0.6755
Anpep	ANPEP	0.389058	966	0	0	0	60	0	0	0	0	0	0.232222	0	0	3.181
Anxa1	ANXA1	4.2366	346	95	0	0	80	40	60	0.924865	0	0	0.864458	0.405451	0.402866	0.072
Anxa11	ANXA11	0.803356	503	0	0	0	70	0	30	0	0	0	0.520307	0	0.13856	0.367
Anxa2	ANXA2	5.64083	339	305	25	0	140	70	90	3.03062	0.311809	0	1.54404	0.72419	0.616777	0.583
Anxa3	ANXA3	1.97557	323	0	0	0	0	20	20	0	0	0	0	0.217161	0.143851	-2.871
Anxa4	ANXA4	1.40378	319	0	30	10	20	0	0	0	0.39763	0.136538	0.234406	0	0	3.177
Anxa5	ANXA5	11.3706	319	170	60	80	210	40	150	1.7951	0.79526	1.09231	2.46127	0.439768	1.09241	0.511
Anxa6	ANXA6	5.99798	670	175	85	65	225	65	85	0.879838	0.536416	0.422564	1.25559	0.340252	0.294739	0.8035
Anxa7	ANXA7	0.70673	463	0	20	0	130	0	10	0	0.182641	0	1.04977	0	0.050177	2.162
Aoc3	AOC3	0.434943	765	0	0	0	0	10	0	0	0	0	0	0.0458451	0	-1.535
Ap1b1	AP1B1	12.0539	947.333	58	61	54.6667	76.4667	67.6667	144.333	0.206236	0.27226	0.251382	0.303173	0.251662	0.354056	-0.305667
Ap1g1	AP1G1	17.5086	825	0	40	60	70	70	120	0	0.205	0.316769	0.31723	0.297576	0.337919	-0.604
Ap1m1	AP1M1	24.9352	423	0	0	0	10	50	90	0	0	0	0.0883872	0.414556	0.494296	-2.887
Ap2a1	AP2A1	10.5886	966	0	118	93	184.8	176	296.4	0	0.516547	0.41938	0.715337	0.639066	0.712923	-0.676
Ap2a2	AP2A2	61.2823	938	335	256	253	319.8	446	546.4	1.20302	1.15395	1.1748	1.27469	1.66758	1.3533	-0.339
Ap2b1	AP2B1	15.2028	944	74	107	117	229.4	198	303	0.264067	0.479274	0.539862	0.908605	0.73565	0.745727	-0.449
Ap2m1	AP2M1	219.098	435	70	120	120	220	170	220	0.54205	1.16638	1.20154	1.89088	1.37061	1.17495	-0.194
Ap2s1	AP2S1	56.226	142	20	55	30	20	20	0	0.47443	1.63766	0.920191	0.526589	0.493964	0	1.304
Ap3b1	AP3B1	9.16773	1105	0	0	0	0	55	75	0	0	0	0	0.174564	0.157683	-4.085
Ap3b2	AP3B2	25.9031	1082	0	50	110	80	235	465	0	0.195385	0.442803	0.276435	0.761719	0.998415	-1.569
Ap3d1	AP3D1	30.9688	1199	0	0	0	50	120	320	0	0	0	0.155912	0.351007	0.620035	-2.617
Ap3m1	AP3M1	8.19723	418	0	0	0	0	30	0	0	0	0	0	0.251709	0	-2.61
Ap3m2	AP3M2	15.4913	418	0	0	0	20	0	130	0	0	0	0.178889	0	0.722524	-2.241
Ap3s1	AP3S1	25.7663	193	0	0	30	20	30	20	0	0	0.677032	0.387438	0.545152	0.240745	-0.459
Ap3s2	AP3S2	14.3772	193	0	5	0	0	0	0	0	0.109537	0	0	0	0	1.103
Apba1	APBA1	16.7712	842	0	0	0	0	0	20	0	0	0	0	0	0.0551827	-2.254
Apc	APC	47.9662	2842	0	25	0	0	0	0	0	0.0371933	0	0	0	0	2.378
Apc2	APC2	7.4203	2274	40	0	0	0	0	0	0.0592516	0	0	0	0	0	2.793
Apeh	APEH	12.6078	732	0	60	50	70	30	90	0	0.346568	0.297512	0.357534	0.143736	0.285639	-0.087
Apex1	APEX1	4.16275	317	0	0	0	0	60	50	0	0	0	0	0.663813	0.366434	-3.915
Api5	API5	25.5648	504	0	0	0	0	200	440	0	0	0	0	1.39173	2.02818	-5.729
Aplp2	APLP2	57.7564	717.667	3	0	12.6667	0	0	7.8	0.013642	0	0.0751193	0	0	0.0252777	0.0343333
Apmap	APMAP	8.53975	415	0	15	0	0	70	60	0	0.152824	0	0	0.591567	0.335883	-2.481
Apoa1	APOA1	0.14751	264	0	20	0	30	20	30	0	0.320313	0	0.424861	0.265693	0.263999	-0.458
Apoa1bp	APOA1BP	28.0483	282	0	55	50	0	40	20	0	0.824636	0.772264	0	0.497468	0.164765	0.082
Apoa4	APOA4	0	395	0	35	0	0	0	0	0	0.374645	0	0	0	0	2.671
Apobec2	APOBEC2	7.13122	224	0	0	0	30	0	0	0	0	0	0.500729	0	0	2.546
Apoc4	APOC4	0	124	0	15	0	0	0	0	0	0.511468	0	0	0	0	1.925
Apoe	APOE	250.253	311	100	80	80	110	100	90	1.0831	1.08762	1.1204	1.3224	1.1277	0.672307	0.168
Apoo	APOO	8.24087	191.333	0	19	0	0	0	9.9	0	0.424837	0	0	0	0.12163	0.235
Apool	APOOL	6.856	265	110	25	50	0	30	40	1.39823	0.39888	0.821806	0	0.397036	0.350671	0.481
App	APP	16.4141	740.2	0	0	0	0	0	5.2	0	0	0	0	0	0.0163406	-0.9372
Appl1	APPL1	14.2925	707	25	20	0	50	0	90	0.119111	0.119608	0	0.264412	0	0.295739	-0.442
Appl2	APPL2	23.1945	662	0	0	20	0	0	50	0	0	0.131588	0	0	0.175468	-1.299
Aprt	APRT	6.54508	180	5	0	0	20	0	0	0.0935682	0	0	0.41542	0	0	2.335
Aqp1	AQP1	8.26113	269	35	70	90	40	0	10	0.438275	1.10026	1.45725	0.555952	0	0.0863641	2.595
Aqr	AQR	17.5545	1481	0	0	0	0	60	150	0	0	0	0	0.142086	0.2353	-4.488
Araf	ARAF	18.5604	395	0	0	15	0	0	0	0	0	0.189197	0	0	0	1.8805
Arcn1	ARCN1	36.4239	511	0	0	0	60	50	130	0	0	0	0.438996	0.343165	0.591028	-1.549
Arf1	ARF1	1.64522	181	122	159	68	122.2	58	77.4	2.27045	3.71422	1.63635	2.52419	1.12384	0.993454	0.754
Arf3	ARF3	35.4537	181	137	164	68	122.2	58	77.4	2.5496	3.83102	1.63635	2.52419	1.12384	0.993454	0.792
Arf4	ARF4	38.3569	180	77	98	57	64	45	52.5	1.44095	2.30198	1.37926	1.32934	0.876787	0.677598	0.614
Arf5	ARF5	34.6124	180	52	124	33	77.2	48	32.4	0.973109	2.91271	0.798521	1.60352	0.935239	0.418175	0.774
Arf6	ARF6	8.15496	175	0	30	22	34	0	20	0	0.724823	0.547558	0.726391	0	0.265508	0.94
Arfgap1	ARFGAP1	1.14638	390.25	0	7	0	0	2	0	0	0.0760244	0	0	0.0180173	0	0.8395
Arfgap2	ARFGAP2	7.85227	527	0	19.5	0	30	15	15	0	0.15621	0	0.212871	0.0998415	0.0661367	0.0525
Arfgef1	ARFGEF1	31.5915	1846	0	10	0	0	0	165	0	0.0229043	0	0	0	0.207653	-3.071
Arfgef2	ARFGEF2	6.79203	1792	0	40	0	10	10	125	0	0.094378	0	0.0208637	0.0195711	0.162053	-1.454
Arfip1	ARFIP1	9.23854	373	0	0	0	0	0	10	0	0	0	0	0	0.062284	-1.572
Arfip2	ARFIP2	16.3993	341	0	0	0	10	30	10	0	0	0	0.109642	0.308547	0.0681288	-1.634
Arfrp1	ARFRP1	0.301017	201	145	100	60	0	0	0	2.42998	2.10355	1.30017	0	0	0	4.751
Arg2	ARG2	4.16807	354	15	35	20	0	0	0	0.142731	0.418036	0.246077	0	0	0	3.306
Arglu1	ARGLU1	37.8085	271	0	30	20	0	50	0	0	0.468059	0.321444	0	0.647075	0	-0.478
Arhgap1	ARHGAP1	2.35765	459	44.5	42	25	85	20	40	0.326392	0.387624	0.237683	0.693684	0.153108	0.202842	0.6905
Arhgap17	ARHGAP17	1.16058	779.8	0	0	4	0	0	0	0	0	0.0224172	0	0	0	0.9568
Arhgap26	ARHGAP26	6.33347	814	0	0	0	0	0	30	0	0	0	0	0	0.0856214	-2.618
Arhgap32	ARHGAP32	5.60205	1914.5	0	0	0	15	20	25	0	0	0	0.0268462	0.0361028	0.0278027	-1.6375
Arhgap33	ARHGAP33	5.60654	1305	0	0	0	0	10	0	0	0	0	0	0.0268747	0	-1.553
Arhgap5	ARHGAP5	23.8229	1503	0	0	0	20	0	10	0	0	0	0.0497509	0	0.015457	0.269
Arhgdia	ARHGDIA	21.128	204	60	115	140	110	80	110	0.990722	2.38351	2.98912	2.01601	1.37535	1.2527	0.307
Arhgef10l	ARHGEF10L	1.83841	1250.67	0	0	0	0	0	3.3	0	0	0	0	0	0.00613113	-0.537
Arhgef12	ARHGEF12	13.26	1544	0	0	0	70	0	0	0	0	0	0.169504	0	0	3.325
Arhgef17	ARHGEF17	5.476	2057	0	0	60	0	0	0	0	0	0.127046	0	0	0	3.174
Arhgef19	ARHGEF19	1.21028	802	30	0	0	0	0	0	0.126002	0	0	0	0	0	2.557
Arhgef2	ARHGEF2	2.53771	966.75	0	0	15	0	0	5	0	0	0.0675901	0	0	0.0121506	1.2905
Arhgef4	ARHGEF4	5.57357	484	0	0	0	0	30	0	0	0	0	0	0.217385	0	-2.61
Arhgef6	ARHGEF6	0.648607	795	0	0	6	0	0	0	0	0	0.0328722	0	0	0	1.21
Arhgef7	ARHGEF7	5.95545	675.5	0	0	6	0	0	0	0	0	0.0387615	0	0	0	1.2275
Arid1a	ARID1A	24.5645	2283	0	0	0	0	110	75	0	0	0	0	0.168982	0.0763204	-4.466
Arid1b	ARID1B	6.27592	2244	0	0	0	0	70	45	0	0	0	0	0.109403	0.0465881	-4.009
Arid2	ARID2	14.7288	1828	0	0	0	0	40	0	0	0	0	0	0.0767428	0	-2.919
Arih1	ARIH1	19.2198	555	0	0	0	0	0	30	0	0	0	0	0	0.125578	-2.627
Arl1	ARL1	45.0052	181	0	25	0	30	0	10	0	0.583996	0	0.619687	0	0.128353	1.178
Arl13b	ARL13B	17.1372	427	195	20	0	0	0	0	1.53829	0.198039	0	0	0	0	4.438
Arl15	ARL15	7.11236	204	0	0	0	10	20	10	0	0	0	0.183273	0.343838	0.113882	-1.351
Arl2	ARL2	18.7375	184	15	15	0	0	10	0	0.274602	0.344685	0	0	0.190606	0	0.588
Arl3	ARL3	156.231	182	250	370	210	280	50	80	4.627	8.59566	5.02566	5.75197	0.963502	1.02118	1.648
Arl5a	ARL5A	13.3465	179	0	7	0	0	0	3.3	0	0.165346	0	0	0	0.0428298	0.415
Arl5b	ARL5B	6.14037	180	0	17	0	0	0	3.3	0	0.399324	0	0	0	0.0425919	1.149
Arl5c	ARL5C	1.66587	179	0	0	0	0	0	3.3	0	0	0	0	0	0.0428298	-0.55
Arl6	ARL6	84.1779	186	190	135	110	250	30	50	3.44089	3.06881	2.57588	5.02524	0.565669	0.624514	1.655
Arl6ip5	ARL6IP5	36.367	188	10	40	0	0	80	0	0.179173	0.899603	0	0	1.4924	0	-0.952
Arl8a	ARL8A	33.2906	186	0	62	25	5	75	45	0	1.40938	0.585426	0.100505	1.41417	0.562063	-0.752
Arl8b	ARL8B	23.6605	186	70	92	55	5	85	75	1.2677	2.09133	1.28794	0.100505	1.60273	0.936772	-0.171
Armc10	ARMC10	9.24356	306	0	5	0	0	20	30	0	0.0690871	0	0	0.229225	0.227764	-2.345
Armcx2	ARMCX2	0.934986	784	0	0	0	0	0	10	0	0	0	0	0	0.0296326	-1.53
Armcx3	ARMCX3	20.0446	379	0	0	0	0	10	0	0	0	0	0	0.0925369	0	-1.555
Arpc1a	ARPC1A	22.9331	370	0	30	10	50	60	90	0	0.342822	0.117718	0.50524	0.568727	0.565101	-1.001
Arpc1b	ARPC1B	2.84562	372	0	0	0	5	20	10	0	0	0	0.0502524	0.188556	0.0624514	-1.85
Arpc2	ARPC2	56.079	300	0	0	10	30	80	90	0	0	0.145186	0.373878	0.935239	0.696958	-1.902
Arpc3	ARPC3	38.968	178	60	45	30	20	30	50	1.13543	1.06891	0.734085	0.420088	0.591092	0.652582	0.164
Arpc4	ARPC4	3.06365	112.333	6.66667	23.3333	16.6667	20	30	30	0.267338	0.587241	0.4321	0.445093	0.626276	0.414856	0.895
Arpc5	ARPC5	21.8474	151	0	15	0	30	30	70	0	0.420013	0	0.742804	0.696784	1.07698	-1.256
Arpc5l	ARPC5L	11.1725	153	0	20	10	20	20	40	0	0.552697	0.284678	0.488729	0.458451	0.607371	-0.668
Arpp19	ARPP19	12.1539	145	0	0	0	3.3	0	0	0	0	0	0.0850895	0	0	0.841
Arr3	ARR3	23.0823	381	15	10	0	40	10	0	0.132616	0.110975	0	0.392523	0.0920511	0	1.339
Arrb1	ARRB1	4.21522	414	0	15	0	0	15	0	0	0.153208	0	0	0.127082	0	-0.3715
Arsb	ARSB	8.68984	534	0	0	0	0	20	0	0	0	0	0	0.131354	0	-2.219
Arvcf	ARVCF	4.71978	962	0	0	0	80	90	170	0	0	0	0.310917	0.328112	0.410544	-1.645
Arxes2	N/A	28.435	180	0	0	0	0	60	30	0	0	0	0	1.16905	0.387199	-3.686
As3mt	AS3MT	17.8338	376	100	20	0	60	0	20	0.895866	0.224901	0	0.596614	0	0.123574	1.677
Asah1	ASAH1	14.8294	394	25	0	0	0	0	30	0.213734	0	0	0	0	0.176893	-0.597
Asap2	ASAP2	3.79088	971	20	0	10	6.6	0	6.66667	0.0673691	0	0.0445819	0.0254241	0	0.015488	1.46067
Asf1a	ASF1A	6.56136	204	0	0	0	0	0	10	0	0	0	0	0	0.113882	-1.561
Ash2l	ASH2L	5.86284	578.5	0	0	0	0	0	10	0	0	0	0	0	0.040398	-1.552
Asl	ASL	8.57682	464	0	35	0	40	10	50	0	0.318932	0	0.322309	0.0755851	0.250344	-0.249
Asna1	ASNA1	30.6114	348	0	15	10	50	70	80	0	0.182247	0.12516	0.537181	0.705461	0.534067	-1.181
Asph	ASPH	1.43046	575.667	1.66667	3	0	0	16.6667	26.6667	0.0215099	0.0172019	0	0	0.0797536	0.0845282	-1.46867
Asrgl1	ASRGL1	14.8715	326	120	45	70	80	40	40	1.23992	0.583638	0.935245	0.917492	0.430325	0.285054	0.875
Ass1	ASS1	1.07178	412	20	0	0	0	20	80	0.163517	0	0	0	0.17025	0.451106	-1.981
Atad2b	ATAD2B	12.8804	1460	0	0	0	0	230	170	0	0	0	0	0.552496	0.270509	-5.257
Atad3a	ATAD3A	6.21925	591	130	0	60	0	30	140	0.740946	0	0.44219	0	0.178028	0.550333	-0.379
Atcay	ATCAY	15.866	372	0	0	0	0	0	30	0	0	0	0	0	0.187354	-2.603
Atf1	ATF1	6.25576	269	0	0	0	0	12	0	0	0	0	0	0.156453	0	-1.719
Atg2b	ATG2B	8.30162	2075	0	0	0	0	0	30	0	0	0	0	0	0.0335883	-2.601
Atg3	ATG3	19.0644	314	0	0	20	0	0	0	0	0	0.277425	0	0	0	2.186
Atg4b	ATG4B	11.1375	393	0	0	0	0	0	10	0	0	0	0	0	0.0591143	-1.548
Atic	ATIC	5.65228	592	0	10	0	80	20	110	0	0.0714212	0	0.50524	0.118485	0.431674	-0.843
Atl1	ATL1	8.20209	558	0	0	0	0	20	0	0	0	0	0	0.125704	0	-2.213
Atl2	ATL2	7.18438	497.5	0	7.5	0	0	5	10	0	0.0543928	0	0	0.0363205	0.0563882	-0.864
Atm	ATM	3.31315	3066	0	0	0	20	0	0	0	0	0	0.0243886	0	0	2.192
Atox1	ATOX1	41.4421	68	0	0	0	30	0	0	0	0	0	1.64946	0	0	2.556
Atp11a	ATP11A	25.0575	1187	0	50	0	86.6	0	20	0	0.178102	0	0.27277	0	0.0391439	1.408
Atp11c	ATP11C	2.01859	1122.5	0	0	0	11.6	0	0	0	0	0	0.0386381	0	0	1.7165
Atp12a	ATP12A	0.008732	1035	477	0	304	0	0	0	1.55242	0	1.27932	0	0	0	5.712
Atp13a1	ATP13A1	7.3237	1200	0	0	10	0	60	40	0	0	0.0362964	0	0.175357	0.0774398	-2.572
Atp1a1	ATP1A1	46.9965	1023	1008	2138	2050	2588.7	1519	1650.3	3.31906	8.83651	8.72817	9.46097	5.20758	3.74777	0.399
Atp1a2	ATP1A2	5.92208	1020	0	961	800	797	699	850.3	0	3.98356	3.41613	2.92138	2.40343	1.93668	0.002
Atp1a3	ATP1A3	395.931	1053	1438	2185	2270	1890.3	1709	1955.3	4.60004	8.77348	9.3895	6.71169	5.69204	4.3139	0.255
Atp1a4	ATP1A4	0.904005	1032	324	420	738	593.4	0	0	1.05754	1.72075	3.11474	2.1498	0	0	6.671
Atp1b1	ATP1B1	83.55	304	335	180	220	390	120	240	3.71195	2.5035	3.15206	4.79646	1.3844	1.8341	0.642
Atp1b2	ATP1B2	413.659	290	500	255	430	480	290	460	5.80768	3.71784	6.45826	6.18832	3.50715	3.68507	0.297
Atp1b3	ATP1B3	27.1834	278	60	10	0	110	90	110	0.727005	0.152091	0	1.47937	1.13541	0.919249	-0.597
Atp2a1	ATP2A1	0.225222	994	0	122	0	0	0	0	0	0.518946	0	0	0	0	3.863
Atp2a2	ATP2A2	3.074	1021	53.5	125	150	95	245	280	0.174848	0.517909	0.639742	0.348055	0.842005	0.637438	-0.7165
Atp2b1	ATP2B1	54.4487	1220	95	478	537	567.3	443	779	0.262298	1.6566	1.91717	1.73853	1.2735	1.48342	-0.183
Atp2b2	ATP2B2	7.55417	1198	0	423	378	612.3	323	417.4	0	1.49291	1.3743	1.9109	0.945583	0.809433	0.15
Atp2b3	ATP2B3	3.39375	1220	0	145	153	177.3	163	244	0	0.502524	0.546231	0.543349	0.468578	0.464639	-0.342
Atp2b4	ATP2B4	2.778	1185.5	0	84.5	59.5	71.25	95	104.55	0	0.300369	0.215068	0.221069	0.276497	0.20831	-0.731
Atp2c1	ATP2C1	7.82332	846.333	63.6667	12.3333	72	6.6	9	33	0.267337	0.0623778	0.379929	0.029895	0.0382403	0.0928804	0.784667
Atp4a	ATP4A	0.083497	1025	377	515	391	418.5	330	292.5	1.23893	2.12438	1.66149	1.52652	1.12913	0.66296	0.506
Atp5a1	ATP5A1	178.529	553	1890	1445	1830	1210	1240	1450	11.5124	11.0482	14.4136	8.18069	7.86413	6.09156	0.364
Atp5b	ATP5B	317.047	529	3690	1980	2070	1290	1560	1560	23.4964	15.8255	17.0435	9.11725	10.3424	6.85101	0.563
Atp5c1	ATP5C1	71.5694	286	212	165	145	90	120	100	2.49883	2.4405	2.21214	1.17861	1.47413	0.813738	0.525
Atp5d	ATP5D	48.2919	168	60	65	60	40	40	50	1.20302	1.63588	1.55556	0.890185	0.835035	0.691427	0.421
Atp5e	ATP5EP2	61.0091	52	60	105	80	30	30	30	3.88668	8.53758	6.70088	2.15699	2.02335	1.3403	1.032
Atp5f1	ATP5F1	86.7513	256	225	165	180	30	100	190	2.96056	2.72516	3.06251	0.438138	1.36998	1.72425	0.228
Atp5h	ATP5H	180.683	161	160	150	160	50	160	210	3.34753	3.93925	4.32852	1.16111	3.48536	3.03025	-0.16
Atp5j	ATP5J	62.894	108	30	45	30	0	0	0	0.935682	1.76172	1.20988	0	0	0	3.719
Atp5j2	ATP5J2	150.212	88	170	100	120	10	170	80	6.50724	4.8047	5.93942	0.424861	6.77517	2.11199	-0.028
Atp5k	ATP5I	211.645	71	190	210	100	30	130	120	9.01418	12.5057	6.13461	1.57977	6.42154	3.92652	0.252
Atp5l	ATP5L	135.235	103	105	90	60	20	40	110	3.43386	3.69449	2.53723	0.725977	1.362	2.48108	0.108
Atp6ap1	ATP6AP1	65.0015	463	50	10	30	0	80	90	0.363764	0.0913204	0.282218	0	0.605987	0.451593	-1.132
Atp6ap2	ATP6AP2	28.7094	350	0	0	0	0	20	20	0	0	0	0	0.200408	0.132754	-2.871
Atp6v0a1	ATP6V0A1	14.74	822	0	64	71.25	86.85	59.25	156.75	0	0.325885	0.371071	0.388263	0.248467	0.435431	0.224
Atp6v0a2	ATP6V0A2	9.20677	856	0	45	50	40	0	0	0	0.222273	0.254414	0.174709	0	0	3.96
Atp6v0c	ATP6V0C	77.9058	155	0	65	0	0	0	0	0	1.77309	0	0	0	0	3.286
Atp6v0d1	ATP6V0D1	67.9049	351	160	100	140	140	210	160	1.53548	1.2046	1.73726	1.49125	2.09829	1.05901	-0.119
Atp6v1a	ATP6V1A	46.5145	617	465	395	580	840	670	1080	2.53862	2.70683	4.09438	5.09007	3.80841	4.06653	-0.234
Atp6v1b2	ATP6V1B2	87.9711	511	575	380	450	530	530	730	3.79034	3.14421	3.83563	3.87779	3.63755	3.31885	-0.07
Atp6v1c1	ATP6V1C1	27.5209	382	100	165	50	80	140	130	0.881795	1.82629	0.570101	0.78299	1.28534	0.790616	-0.118
Atp6v1c2	ATP6V1C2	0.0293415	432	0	2	0	0	0	0	0	0.0195773	0	0	0	0	0.6245
Atp6v1d	ATP6V1D	51.2889	247	0	15	80	80	80	110	0	0.256769	1.41071	1.21094	1.13592	1.03462	-0.576
Atp6v1e1	ATP6V1E1	76.5926	226	230	220	280	240	270	250	3.42807	4.11588	5.39628	3.97038	4.18996	2.5699	0.125
Atp6v1f	ATP6V1F	57.5953	119	15	90	20	100	60	60	0.424595	3.19775	0.732029	3.14183	1.76831	1.17136	0.129
Atp6v1g1	ATP6V1G1	59.3578	118	50	70	20	50	30	50	1.42731	2.50821	0.738232	1.58423	0.891648	0.984404	0.37
Atp6v1g2	ATP6V1G2	45.7591	118	5	50	100	30	10	40	0.142731	1.79158	3.69116	0.950537	0.297216	0.787523	0.819
Atp6v1h	ATP6V1H	25.7293	483	85	100	150	190	200	310	0.592792	0.87539	1.35266	1.47074	1.45224	1.49108	-0.471
Atp7a	ATP7A	1.97972	1491.5	0	0	0	5	0	0	0	0	0	0.0125336	0	0	1.087
Atp8a1	ATP8A1	4.31116	1156.5	0	22	0	0	0	83.3	0	0.0804348	0	0	0	0.167341	-1.7225
Atp8a2	ATP8A2	24.9777	1148	90	232	240	0	30	73.3	0.264077	0.854466	0.910572	0	0.0916502	0.148336	1.202
Atp9a	ATP9A	34.5144	1047	10	35	120	20	0	60	0.0321724	0.141342	0.499206	0.0714189	0	0.133134	0.618
Atpaf1	ATPAF1	7.13976	348	55	0	0	0	0	0	0.532371	0	0	0	0	0	3.107
Atpif1	ATPIF1	190.241	106	65	195	140	30	10	60	2.06556	7.77817	5.75264	1.05814	0.330863	1.31502	1.321
Atrn	ATRN	13.6716	1428	0	0	0	0	0	10	0	0	0	0	0	0.0162689	-1.54
Atrx	ATRX	41.2601	2476	0	0	0	0	140	200	0	0	0	0	0.198304	0.187657	-5.011
Atxn10	ATXN10	55.4566	475	0	0	0	0	0	70	0	0	0	0	0	0.342365	-3.471
Atxn1l	ATXN1L	6.3513	687	0	0	0	0	50	0	0	0	0	0	0.255251	0	-3.109
Atxn2	ATXN2	24.9071	1286	0	110	0	90	0	50	0	0.36166	0	0.261656	0	0.0903263	0.887
Atxn2l	ATXN2L	26.5846	1049	0	185	0	110	0	90	0	0.745667	0	0.392055	0	0.199321	0.688
AU040320	KIAA0319L	5.85891	1066.5	0	17	0	20	0	0	0	0.0681046	0	0.0701342	0	0	2.677
Auh	AUH	17.6388	314	245	170	220	0	60	70	2.62825	2.28912	3.05167	0	0.670156	0.517909	1.091
Aup1	AUP1	21.3637	439	0	0	0	0	30	0	0	0	0	0	0.239668	0	-2.604
Aurkaip1	AURKAIP1	14.6779	200	0	5	0	0	0	0	0	0.105703	0	0	0	0	1.111
Avl9	AVL9	8.55841	649	0	0	0	0	0	10	0	0	0	0	0	0.0357965	-1.559
AW549877	C5orf51	64.8885	294	45	25	0	10	10	0	0.51558	0.359535	0	0.127169	0.119291	0	1.528
Azi1	AZI1	3.9659	1059	60	45	90	80	0	0	0.190847	0.179666	0.370162	0.282438	0	0	4.658
B230208H17Rik	RABL6	13.9527	725	0	0	0	0	0	80	0	0	0	0	0	0.256352	-3.623
B2m	B2M	26.0373	119	0	15	0	10	0	0	0	0.532958	0	0.314183	0	0	2.339
B3galt6	B3GALT6	2.52291	325	105	5	0	0	0	0	1.08827	0.0650482	0	0	0	0	3.764
B3gat3	B3GAT3	20.048	335	80	30	50	0	40	0	0.804407	0.378639	0.650085	0	0.418764	0	0.875
B3gnt1	B3GNT1	8.66752	415	0	5	0	0	10	0	0	0.0509414	0	0	0.0845096	0	-0.83
B4galnt1	B4GALNT1	3.18538	551	0	0	30	0	0	0	0	0	0.237399	0	0	0	2.543
B4galt1	B4GALT1	11.1878	399	20	0	10	0	0	0	0.168845	0	0.109162	0	0	0	2.516
B4galt5	B4GALT5	3.37075	388	20	0	0	0	0	0	0.173632	0	0	0	0	0	2.171
B9d1	B9D1	9.31044	204	105	105	80	50	0	0	1.73376	2.17625	1.70807	0.916367	0	0	4.874
B9d2	B9D2	12.8537	175	0	15	50	0	0	0	0	0.362411	1.24445	0	0	0	3.259
Bag5	BAG5	9.65866	447	0	0	0	0	0	10	0	0	0	0	0	0.051973	-1.55
Bag6	BAG6	10.0106	1137.33	12.3333	0	12.3333	10	23.3	30	0.0367865	0	0.047152	0.0326551	0.0715791	0.0608735	-0.581
Banf1	BANF1	31.6395	89	30	0	0	0	0	10	1.13543	0	0	0	0	0.261033	0.634
Banp	BANP	1.96028	546.5	0	0	0	0	10	0	0	0	0	0	0.0641752	0	-1.5475
Basp1	BASP1	81.6345	226	265	90	80	250	0	0	3.94974	1.68377	1.5418	4.13582	0	0	5.565
Bax	BAX	17.5753	192	0	10	30	10	30	30	0	0.220215	0.680558	0.194728	0.547992	0.362999	-0.663
Baz1b	BAZ1B	15.4653	1479	0	0	0	0	40	0	0	0	0	0	0.0948519	0	-2.878
Bbip1	BBIP1	6.00358	67	15	40	30	20	0	0	0.754132	2.52426	1.95026	1.11605	0	0	3.715
Bbs1	BBS1	17.492	593	720	355	420	710	0	20	4.08986	2.53118	3.08489	4.47645	0	0.0783539	4.176
Bbs2	BBS2	17.0143	721	655	420	380	660	0	30	3.06011	2.46299	2.29559	3.42246	0	0.0966655	3.741
Bbs4	BBS4	34.9297	520	1010	570	320	450	0	0	6.54258	4.63468	2.68035	3.23548	0	0	6.809
Bbs5	BBS5	33.9749	341	205	115	130	190	0	10	2.02502	1.42591	1.66048	2.08319	0	0.0681288	3.606
Bbs7	BBS7	39.2403	715	470	365	450	500	10	0	2.21423	2.15842	2.74127	2.61453	0.049051	0	4.635
Bbs9	BBS9	5.94105	880	770	460	340	860	0	0	2.9474	2.21016	1.68283	3.65381	0	0	6.825
BC003331	C1orf27	7.27434	431	0	0	0	0	5	0	0	0	0	0	0.0407423	0	-0.915
BC005764	LPPR3	6.03321	716	0	0	0	0	50	40	0	0	0	0	0.244913	0.129787	-3.7
BC017158	C16orf58	9.11065	466	0	0	30	0	50	50	0	0	0.280402	0	0.376303	0.24927	-1.613
BC026585	N/A	1.84453	350	0	0	0	0	10	0	0	0	0	0	0.100204	0	-1.567
BC027072	C2orf71	32.2005	1279	0	20	0	0	0	0	0	0.0661162	0	0	0	0	2.181
BC048355	DNPH1	1.50885	173	0	0	0	10	0	0	0	0	0	0.216114	0	0	1.606
Bcam	BCAM	4.61354	622	0	50	70	70	50	30	0	0.339882	0.490177	0.420763	0.281925	0.112051	0.373
Bcap31	BCAP31	27.2366	245	40	0	20	0	0	10	0.549952	0	0.355557	0	0	0.0948242	1.276
Bcas2	BCAS2	34.5988	225	0	0	40	20	90	60	0	0	0.774324	0.332336	1.40286	0.619518	-1.391
Bcat1	BCAT1	8.63067	419.5	0	27	30	55	5	25	0	0.273879	0.305138	0.493332	0.0420698	0.139339	0.8325
Bcat2	BCAT2	0.971267	373	0	5	0	0	7.5	5	0	0.0598886	0	0	0.0694584	0.0312318	-1.0455
Bckdha	BCKDHA	6.41383	446	20	0	0	0	0	60	0.151052	0	0	0	0	0.312537	-1.483
Bcl2l1	BCL2L1	13.8666	233	0	0	0	0	20	10	0	0	0	0	0.301043	0.0997079	-2.584
Bcl2l13	BCL2L13	7.55256	434	75	0	30	20	50	20	0.582106	0	0.301076	0.172294	0.404049	0.10706	0.089
Bcl7c	BCL7C	4.11425	217	0	0	0	0	30	0	0	0	0	0	0.484859	0	-2.588
Bclaf1	BCLAF1	12.5317	902	1	0	19.3333	0	56	83.3333	0.00373683	0	0.0939983	0	0.217878	0.210893	-2.24867
Bcor	BCOR	1.30012	1733	0	0	0	0	2	0	0	0	0	0	0.00404799	0	-0.124
Bcr	BCR	6.81764	1270	0	0	0	0	40	37.5	0	0	0	0	0.110461	0.0685982	-3.531
Bdh1	BDH1	0.102254	343	155	85	90	40	60	100	1.52219	1.04779	1.14286	0.436009	0.613495	0.677316	0.34
Bdh2	BDH2	1.10945	250	0	10	30	20	0	10	0	0.165809	0.521135	0.299222	0	0.0929649	1.23
Bet1	BET1	7.26615	118	0	0	0	0	20	0	0	0	0	0	0.594432	0	-2.219
Bfsp1	BFSP1	0.940425	663	0	0	0	90	0	330	0	0	0	0.507527	0	1.15634	-1.774
Bfsp2	BFSP2	0.390085	416	0	0	0	70	0	240	0	0	0	0.629121	0	1.3403	-1.696
Bicd1	BICD1	2.6628	835	7	0	0	0	0	0	0.0282385	0	0	0	0	0	1.315
Bin1	BIN1	45.9513	532.5	8.5	29	22.5	40	23	77.5	0.0520264	0.22861	0.166667	0.254339	0.153146	0.306203	-0.3865
Blmh	BLMH	21.9734	455	0	35	0	120	10	120	0	0.325241	0	0.986052	0.0770802	0.61271	-0.31
Bloc1s1	BLOC1S1	41.578	125	0	35	30	10	0	0	0	1.18388	1.04534	0.299102	0	0	3.37
Blvra	BLVRA	5.45664	295	0	0	0	0	20	20	0	0	0	0	0.237773	0.157505	-2.881
Blzf1	BLZF1	5.74819	403	0	0	10	0	0	0	0	0	0.108079	0	0	0	1.588
Bmpr2	BMPR2	18.319	1038	0	0	0	30	0	0	0	0	0	0.108057	0	0	2.558
Bnip1	BNIP1	6.31536	228	0	0	0	0	10	0	0	0	0	0	0.153822	0	-1.552
Bola1	BOLA1	6.944	137	40	70	0	0	0	20	0.983491	2.16036	0	0	0	0.339152	1.195
Bola2	BOLA2	36.7705	86	0	30	0	20	0	0	0	1.47493	0	0.869483	0	0	3.004
Bop1	BOP1	5.94071	732	0	0	0	0	0	10	0	0	0	0	0	0.0317376	-1.544
Bpgm	BPGM	23.5419	259	0	0	0	20	0	0	0	0	0	0.288709	0	0	2.203
Bphl	BPHL	5.63898	291	45	50	50	0	50	30	0.520895	0.726483	0.74838	0	0.602603	0.239504	0.106
Bpnt1	BPNT1	21.8012	308	135	125	50	120	60	100	1.47643	1.71596	0.707073	1.45667	0.683211	0.754284	0.493
Bptf	BPTF	17.5586	2921	0	0	0	0	40	0	0	0	0	0	0.0480267	0	-2.887
Braf	BRAF	15.4273	804	0	0	0	0	0	50	0	0	0	0	0	0.144477	-3.116
Brca2	BRCA2	1.11146	3329	0	0	0	10	0	0	0	0	0	0.0112309	0	0	1.587
Brcc3	BRCC3	8.02436	291	0	0	0	0	10	10	0	0	0	0	0.120521	0.0798348	-2.161
Brd1	BRD1	8.03519	1189	0	0	0	0	80	0	0	0	0	0	0.235973	0	-3.603
Brd2	BRD2	3.5798	798	0	0	0	0	20	43.3	0	0	0	0	0.0878984	0.126058	-3.33
Brd3	BRD3	8.36209	726	0	0	0	0	133	129.8	0	0	0	0	0.642494	0.415359	-4.811
Brd4	BRD4	7.58614	1061.5	0	0	0	0	23	28.1	0	0	0	0	0.0845932	0.0684613	-3.1315
Brd8	BRD8	18.4393	951	0	0	0	0	10	0	0	0	0	0	0.0368785	0	-1.536
Bri3bp	BRI3BP	6.3056	253	0	0	0	0	30	20	0	0	0	0	0.415867	0.183652	-3.107
Brox	BROX	14.2789	411	0	0	0	10	0	0	0	0	0	0.0909679	0	0	1.595
Brsk1	BRSK1	7.97762	778	0	0	0	0	22	0	0	0	0	0	0.0991738	0	-2.302
Brsk2	BRSK2	9.24026	682.333	0	0	0	0	12	13.2	0	0	0	0	0.0617776	0.0450148	-2.39467
Brwd1	BRWD1	7.27998	2281.5	22	0	0	0	0	0	0.0324116	0	0	0	0	0	2.233
Bsg	BSG	100.688	331	373.5	166	297.5	358.3	100	92.5	4.10809	2.2315	4.13986	4.21271	1.11228	0.666624	1.3175
Bsn	BSN	7.24836	3942	0	70	90	0	160	0	0	0.075081	0.0994423	0	0.14235	0	-0.495
Btaf1	BTAF1	10.5745	1848	0	0	0	0	20	0	0	0	0	0	0.0379561	0	-2.207
Btbd3	BTBD3	1.44061	530	15	0	0	0	0	0	0.0953336	0	0	0	0	0	1.935
Btf3l4	BTF3L4	21.3379	158	0	5	0	0	0	0	0	0.133802	0	0	0	0	1.1
Btrc	BTRC	8.94837	587	0	0	6	0	0	0	0	0	0.0445622	0	0	0	1.229
Bub3	BUB3	16.1633	326	0	0	0	0	190	140	0	0	0	0	2.04404	0.99769	-4.93
Bud13	BUD13	6.23247	637	0	0	0	0	10	0	0	0	0	0	0.0550573	0	-1.565
Bysl	BYSL	6.04533	436	0	0	0	0	40	0	0	0	0	0	0.321757	0	-2.909
Bzw1	BZW1	54.212	419	35	0	0	0	30	35	0.281375	0	0	0	0.251108	0.194061	-1.038
Bzw2	BZW2	31.994	419	0	0	0	20	20	35	0	0	0	0.178462	0.167406	0.194061	-1.377
C030006K11Rik	C8orf82	3.75956	218	0	0	20	0	0	0	0	0	0.399594	0	0	0	2.178
C1qb	C1QB	7.48832	253	0	0	20	0	0	0	0	0	0.344314	0	0	0	2.192
C1qbp	C1QBP	18.9346	279	0	0	70	0	0	50	0	0	1.0928	0	0	0.416343	-0.136
C1qc	C1QC	5.73973	246	0	0	20	0	0	0	0	0	0.354111	0	0	0	2.196
C2cd2l	C2CD2L	57.299	706	95	45	100	40	170	220	0.453262	0.269499	0.616936	0.211829	0.844497	0.723941	-0.834
C2cd5	C2CD5	6.63281	999	0	0	0	16.5	50	16.5	0	0	0	0.0617516	0.175533	0.0383711	-1.735
C330007P06Rik	CXorf56	10.723	222	0	0	0	0	10	0	0	0	0	0	0.15798	0	-1.555
C7	C7	0.00813	845	0	0	0	20	0	0	0	0	0	0.0884918	0	0	2.173
C77080	KIAA1522	2.55924	1070	0	0	0	10	0	0	0	0	0	0.0349419	0	0	1.621
Cab39	CAB39	28.1282	341	0	5	0	20	0	0	0	0.0619961	0	0.219283	0	0	2.331
Cabp4	CABP4	50.9329	271	5	30	0	30	0	0	0.0621486	0.468059	0	0.413887	0	0	3.213
Cacna1f	CACNA1F	25.1566	1984	0	0	0	0	0	10	0	0	0	0	0	0.0117096	-1.541
Cacna2d1	CACNA2D1	1.85152	1088.6	0	18.8	11.8	22.98	25.8	36.96	0	0.0730236	0.0471106	0.0789289	0.0831247	0.0788813	-0.6404
Cacna2d2	CACNA2D2	3.20459	1151	27.4	14	8	21	16	39	0.0801861	0.0514287	0.0302736	0.0682147	0.0487531	0.0787188	-0.2494
Cacna2d4	CACNA2D4	48.3784	1144	20	55	50	0	60	10	0.0588891	0.203276	0.190366	0	0.183941	0.0203076	0.093
Cacnb2	CACNB2	31.6824	605	0	0	3	0	0	0	0	0	0.0215979	0	0	0	0.796
Cacnb3	CACNB3	2.1094	484	0	0	13	0	0	0	0	0	0.116988	0	0	0	1.805
Cacnb4	CACNB4	3.40022	486	0	0	3	0	0	0	0	0	0.0268862	0	0	0	0.791
Cacybp	CACYBP	31.2248	229	45	15	0	20	0	0	0.661923	0.276952	0	0.326531	0	0	3.452
Cad	CAD	3.10148	2225	0	10	110	0	30	180	0	0.0190028	0.215332	0	0.0472874	0.187944	-1.045
Cadm1	CADM1	22.4994	436.5	22	15	12	20	25	52.5	0.169975	0.144882	0.119883	0.171511	0.201106	0.279754	-0.62175
Cadm2	CADM2	7.50224	399.5	71	30	30	40	60	80	0.60053	0.317547	0.327118	0.374393	0.526797	0.465279	-0.3025
Cadm3	CADM3	78.7545	396	15	0	0	50	50	110	0.127593	0	0	0.472068	0.442822	0.645331	-1.375
Cadm4	CADM4	19.8583	388	0	0	0	0	10	20	0	0	0	0	0.0903904	0.119752	-2.565
Cadps	CADPS	15.9507	1358	0	34.5	0	75	110	310	0	0.107262	0	0.206487	0.284057	0.530391	-1.852
Calb1	CALB1	13.723	261	0	15	0	45	30	50	0	0.242996	0	0.644617	0.40312	0.445056	-0.754
Calb2	CALB2	97.0564	271	85	75	60	95	150	280	1.05653	1.17015	0.964333	1.31064	1.94123	2.40035	-0.809
Calcoco1	CALCOCO1	20.2164	691	0	0	60	10	0	10	0	0	0.378197	0.0541068	0	0.0336207	1.417
Cald1	CALD1	8.11707	530	85	40	60	30	20	30	0.540224	0.319104	0.493084	0.211629	0.132345	0.131502	0.967
Calm3	CALM1	186.789	149	155	290	200	280	240	370	3.5041	8.22925	5.8464	7.02589	5.6491	5.769	-0.084
Calml4	CALML4	5.2823	153	0	10	0	0	0	0	0	0.276349	0	0	0	0	1.596
Calr	CALR	219.676	416	225	165	80	330	280	430	1.82188	1.67702	0.83761	2.96586	2.36058	2.40138	-0.38
Calu	CALU	27.7753	315	50	0	0	0	0	0	0.534675	0	0	0	0	0	3.019
Camk1	CAMK1	6.02499	374	0	0	10	0	10	0	0	0	0.116459	0	0.093774	0	-0.308
Camk1d	CAMK1D	18.5856	385	0	0	10	40	20	60	0	0	0.113132	0.388445	0.182189	0.362056	-0.929
Camk2a	CAMK2A	4.30678	478	0	28	40	56.2	83	126.4	0	0.247673	0.364483	0.43958	0.608982	0.614334	-1.015
Camk2b	CAMK2B	9.35931	538.667	36	8	31	34.9	43.6667	48.8	0.225157	0.0628046	0.250703	0.242275	0.284078	0.209173	0.011
Camk2d	CAMK2D	13.7319	496.333	67.3333	79.6667	56.3333	55.9	80.3333	97.5	0.456627	0.678759	0.493832	0.421422	0.567139	0.456736	-0.12
Camk2g	CAMK2G	4.40204	514	0	20.6667	21	26	27	77.7	0	0.168174	0.178088	0.189267	0.184369	0.351461	-0.933333
Camkv	CAMKV	15.69	512	0	30	70	40	110	170	0	0.247742	0.595488	0.292092	0.753489	0.771373	-1.183
Caml	CAMLG	18.9465	294	0	0	0	0	40	20	0	0	0	0	0.477163	0.15804	-3.314
Camsap1	CAMSAP1	27.9829	1581	0	0	0	0	0	10	0	0	0	0	0	0.0146945	-1.553
Camsap3	CAMSAP3	5.03967	1252	0	0	0	0	0	10	0	0	0	0	0	0.0185559	-1.541
Cand1	CAND1	14.8888	1230	0	155	170	320	270	640	0	0.532814	0.60199	0.97269	0.769862	1.20882	-0.843
Cand2	CAND2	2.5051	1235	0	0	40	20	0	40	0	0	0.141071	0.060547	0	0.0752451	-0.083
Canx	CANX	63.6679	591	240	155	230	100	440	480	1.3679	1.1089	1.69506	0.632619	2.61107	1.88686	-0.737
Cap1	CAP1	31.3112	474	65	35	0	80	90	120	0.461919	0.312204	0	0.631018	0.665914	0.58815	-0.65
Cap2	CAP2	3.8022	476	0	0	0	0	0	20	0	0	0	0	0	0.0976132	-2.245
Capg	CAPG	0.000253	349	0	0	0	0	0	20	0	0	0	0	0	0.133134	-2.23
Capn2	CAPN2	8.2599	700	0	0	10	0	20	0	0	0	0.0622224	0	0.100204	0	-0.984
Capn6	CAPN6	0.534685	641	115	115	130	430	0	0	0.604325	0.758557	0.883345	2.50807	0	0	5.731
Capns1	CAPNS1	61.7468	268	55	0	0	0	10	10	0.691287	0	0	0	0.130864	0.0866863	0.589
Caprin1	CAPRIN1	6.65154	699	54.3333	59	33	86	23	23.1	0.261818	0.356909	0.205644	0.460029	0.115409	0.076781	1.12567
Caprin2	CAPRIN2	3.61955	1031	0	0	0	30	0	0	0	0	0	0.108791	0	0	2.568
Capza1	CAPZA1	26.2353	286	52	37	20	60	60	95	0.612446	0.546996	0.304585	0.784359	0.735765	0.77169	-0.406
Capza2	CAPZA2	37.7138	286	62	77	80	70	110	175	0.730225	1.13834	1.21834	0.915086	1.3489	1.42153	-0.486
Capzb	CAPZB	32.4491	274.5	112.5	55	50	70	35	75	1.39097	0.847939	0.792708	0.962186	0.451287	0.640586	2.05
Car14	CA14	29.5715	337	350	270	410	690	150	100	3.4984	3.38753	5.29906	7.65507	1.56104	0.689375	1.431
Car2	CA2	155.003	260	75	120	90	260	100	380	0.97167	1.95145	1.5077	3.73878	1.3489	3.39544	-0.374
Car8	CA8	7.64992	291	0	0	0	0	0	10	0	0	0	0	0	0.0798348	-1.559
Carkd	CARKD	6.21858	346	27	22.5	0	10	5	25	0.263651	0.2741	0	0.108384	0.0508346	0.168369	0.2125
Carm1	CARM1	4.27982	596.5	0	0	0	0	0	5	0	0	0	0	0	0.0194808	-0.9155
Cars	CARS	4.06802	789.5	0	0	30	5	10	30	0	0	0.165965	0.0237438	0.0445455	0.088523	-0.5745
Casc4	CASC4	2.43891	390.5	0	0	7	2.5	0	0	0	0	0.0786243	0.0246621	0	0	1.49
Casd1	CASD1	21.705	797	40	15	0	0	0	0	0.169057	0.0795759	0	0	0	0	3.082
Cask	CASK	9.51121	897	0	0	0	30	30	130	0	0	0	0.125043	0.117296	0.336695	-2.081
Caskin1	CASKIN1	6.91877	1431	0	30	20	60	130	180	0	0.0886401	0.0608745	0.156762	0.318609	0.292226	-1.525
Casz1	CASZ1	19.5691	1464	0	0	0	0	80	105	0	0	0	0	0.159235	0.173825	-4.3045
Cat	CAT	14.933	527	0	10	10	160	0	60	0	0.0802302	0.0826484	1.13511	0	0.2645	0.595
Cbr1	CBR1	17.1306	277	162	205	180	220	125	175	1.97	3.12912	2.83034	2.96943	1.58265	1.46772	0.439
Cbr3	CBR3	2.34985	277	52	0	0	30	45	25	0.632345	0	0	0.404922	0.569753	0.209674	-0.315
Cbr4	CBR4	6.92508	236	0	0	40	0	20	0	0	0	0.738232	0	0.297216	0	0.23
Cbx1	CBX1	18.7185	185	0	0	0	0	93	39.9	0	0	0	0	1.76305	0.501056	-4.085
Cbx3	CBX3	58.7615	183	0	0	0	0	91	112.4	0	0	0	0	1.74399	1.42692	-4.484
Cbx4	CBX4	7.17613	551	0	0	0	0	20	0	0	0	0	0	0.127301	0	-2.225
Cbx5	CBX5	2.33566	191	0	0	0	0	43	20	0	0	0	0	0.789567	0.243266	-3.293
Cbx6	CBX6	17.2358	414	0	0	0	0	30	10	0	0	0	0	0.254141	0.0561158	-2.879
Cbx8	CBX8	5.80487	362	0	0	0	0	80	50	0	0	0	0	0.77506	0.320883	-4.082
Cc2d1a	CC2D1A	6.7466	943	0	0	60	10	0	0	0	0	0.277131	0.0396477	0	0	3.352
Cc2d2a	CC2D2A	15.1767	1633	55	205	180	160	0	0	0.113451	0.530782	0.4801	0.366322	0	0	5.437
Ccar1	CCAR1	32.6664	1146	0	0	0	0	260	350	0	0	0	0	0.795688	0.709527	-5.724
Ccbl1	CCBL1	4.47259	424	0	45	0	40	0	30	0	0.448741	0	0.352715	0	0.164377	0.541
Ccdc104	CCDC104	51.0969	343	0	40	50	100	0	0	0	0.493077	0.634923	1.09002	0	0	4.297
Ccdc109a	MCU	10.9758	350	0	45	40	0	10	30	0	0.543617	0.49778	0	0.100204	0.199131	0.28
Ccdc115	CCDC115	17.22	180	0	0	10	0	30	10	0	0	0.241976	0	0.584525	0.129066	-1.635
Ccdc123	CEP89	8.87735	791	30	0	0	0	0	0	0.127754	0	0	0	0	0	2.563
Ccdc124	CCDC124	28.4435	217	0	0	20	0	0	25	0	0	0.401435	0	0	0.267649	-0.616
Ccdc126	CCDC126	63.329	140	80	35	90	0	0	0	1.92483	1.05703	2.80001	0	0	0	4.392
Ccdc127	CCDC127	0.44175	260	35	0	0	0	10	0	0.453446	0	0	0	0.13489	0	0.764
Ccdc132	CCDC132	6.69535	964	0	0	0	0	0	40	0	0	0	0	0	0.0963981	-2.892
Ccdc15	CCDC15	1.59141	823	0	0	50	0	0	0	0	0	0.264616	0	0	0	3.033
Ccdc177	CCDC177	3.49987	706	0	25	60	0	0	40	0	0.149721	0.370162	0	0	0.131626	0.261
Ccdc22	CCDC22	6.26027	627	0	0	30	0	0	20	0	0	0.208401	0	0	0.0741051	-0.03
Ccdc41	CCDC41	4.6459	692	35	5	40	0	0	0	0.17037	0.0305501	0.251767	0	0	0	3.455
Ccdc47	CCDC47	44.9382	483	0	0	0	0	20	60	0	0	0	0	0.145224	0.288595	-3.578
Ccdc55	NSRP1	10.9459	542	0	0	0	0	20	0	0	0	0	0	0.129415	0	-2.212
Ccdc58	CCDC58	3.58203	139	0	22	0	10	0	0	0	0.670068	0	0.269325	0	0	2.5715
Ccdc6	CCDC6	8.27354	469	0	0	0	0	0	20	0	0	0	0	0	0.0990701	-2.23
Ccdc85c	CCDC85C	18.4923	420	92	0	0	0	0	0	0.737852	0	0	0	0	0	3.591
Ccdc88a	CCDC88A	19.5536	1845	0	0	60	0	0	0	0	0	0.141645	0	0	0	3.181
Ccdc9	CCDC9	4.28297	566.5	0	0	0	0	5	5	0	0	0	0	0.0310034	0.0205372	-1.448
Ccdc92	CCDC92	9.05281	314	0	0	0	0	0	10	0	0	0	0	0	0.073987	-1.554
Ccdc93	CCDC93	1.96717	628.5	0	0	0	0	0	15	0	0	0	0	0	0.0554462	-1.925
Ccni	CCNI	62.6828	377	0	5	0	0	0	0	0	0.056076	0	0	0	0	1.111
Ccnl1	CCNL1	32.1731	532	0	0	0	0	0	10	0	0	0	0	0	0.043669	-1.565
Ccny	CCNY	11.4129	341	0	2	0	0	0	10	0	0.0247984	0	0	0	0.0681288	-1.309
Ccnyl1	CCNYL2	4.97741	291	0	7	0	0	0	0	0	0.101708	0	0	0	0	1.337
Ccs	CCS	11.5457	274	0	0	0	10	0	0	0	0	0	0.136452	0	0	1.603
Cct2	CCT2	55.5161	535	115	55	110	210	190	330	0.72406	0.434668	0.895538	1.46756	1.24553	1.433	-0.556
Cct3	CCT3	44.8236	545	340	50	90	200	260	480	2.10142	0.387902	0.719269	1.37203	1.67313	2.04612	-0.586
Cct4	CCT4	47.9036	539	365	65	90	190	270	530	2.28105	0.509886	0.727275	1.31794	1.75683	2.2844	-0.619
Cct5	CCT5	66.8082	541	140	55	70	140	170	280	0.871689	0.429847	0.563567	0.967521	1.10206	1.20239	-0.606
Cct6a	CCT6A	71.2382	531	135	55	130	210	250	410	0.856387	0.437942	1.06634	1.47861	1.6512	1.7938	-0.719
Cct7	CCT7	35.0135	544	85	45	60	90	170	310	0.526321	0.349754	0.480394	0.618548	1.09598	1.32388	-1.04
Cct8	CCT8	53.3274	548	385	145	110	230	270	660	2.36652	1.11876	0.874294	1.5692	1.72797	2.79801	-0.565
Ccz1	CCZ1	20.5434	480	0	0	0	0	40	0	0	0	0	0	0.292262	0	-2.885
Cd163	CD163	0.348421	1121	0	0	0	0	0	10	0	0	0	0	0	0.0207243	-1.561
Cd200	CD200	12.907	278	0	55	50	20	50	20	0	0.836501	0.783376	0.268977	0.630782	0.167136	0.095
Cd276	CD276	10.2975	316	0	0	0	0	0	10	0	0	0	0	0	0.0735188	-1.552
Cd2ap	CD2AP	8.31738	637	20	0	0	0	0	0	0.10576	0	0	0	0	0	2.168
Cd2bp2	CD2BP2	13.1449	342	0	10	0	0	20	30	0	0.12363	0	0	0.205096	0.203789	-1.869
Cd44	CD44	0.399762	557.333	5.83333	2	3	4.9	3	1.6	0.0339919	0.0161109	0.0248947	0.0349033	0.0200454	0.00708183	0.802667
Cd47	CD47	18.2197	324	75	45	0	30	40	30	0.779735	0.587241	0	0.346183	0.432981	0.21511	0.27
Cd81	CD81	87.672	236	20	0	0	0	0	20	0.285462	0	0	0	0	0.196881	-0.398
Cd82	CD82	2.26665	266	15	15	30	50	0	0	0.18995	0.238429	0.49123	0.702778	0	0	3.734
Cd9	CD9	29.9309	226	0	20	0	0	0	0	0	0.374171	0	0	0	0	2.186
Cdc23	CDC23	12.4309	597	0	0	0	0	60	60	0	0	0	0	0.352477	0.233487	-4.007
Cdc37	CDC37	24.9683	379	40	0	0	10	20	0	0.35551	0	0	0.0986485	0.185074	0	0.425
Cdc42	CDC42	40.8186	191	73.5	39.5	20	5	21.5	20	1.29624	0.874405	0.456081	0.0978738	0.394784	0.243266	0.2295
Cdc42bpa	CDC42BPA	16.4764	1732	0	0	0	15	0	15	0	0	0	0.0323797	0	0.02012	-0.368
Cdc42bpb	CDC42BPB	17.797	1713	0	0	0	95	90	105	0	0	0	0.207346	0.184263	0.142402	-1.188
Cdc42ep4	CDC42EP4	8.64341	349	0	0	0	0	80	40	0	0	0	0	0.803931	0.266269	-3.949
Cdc42se2	CDC42SE2	13.1792	84	12	0	0	0	0	0	0.481208	0	0	0	0	0	1.749
Cdc5l	CDC5L	19.7701	802	65	50	90	70	280	220	0.273004	0.263599	0.48878	0.326327	1.22444	0.637285	-1.098
Cdc73	CDC73	9.17263	531	0	0	0	0	70	0	0	0	0	0	0.462336	0	-3.415
Cdh13	CDH13	6.77349	714	0	0	20	0	0	0	0	0	0.122005	0	0	0	2.175
Cdh2	CDH2	36.1493	906	0	20	0	0	90	80	0	0.0933363	0	0	0.348392	0.205138	-2.501
Cdh4	CDH4	7.1948	913	0	0	0	0	10	10	0	0	0	0	0.0384134	0.0254457	-2.171
Cdhr1	CDHR1	214.76	859	285	155	100	150	0	0	1.11759	0.762934	0.507051	0.652872	0	0	5.569
Cdipt	CDIPT	5.08554	213	20	50	60	0	130	70	0.316287	0.99252	1.22692	0	2.14051	0.763491	-0.918
Cdk10	CDK10	5.49542	360	0	0	0	0	10	0	0	0	0	0	0.0974208	0	-1.578
Cdk11b	CDK11B	25.2508	784	0	0	0	0	40	65	0	0	0	0	0.178936	0.192612	-3.833
Cdk13	CDK13	4.9872	1451	0	40	0	20	70	0	0	0.116558	0	0.0515338	0.169194	0	-0.633
Cdk16	CDK16	39.0901	496	0	0	0	0	0	26.6	0	0	0	0	0	0.124591	-2.502
Cdk5	CDK5	13.9713	292	0	0	0	0	110	66.6	0	0	0	0	1.32119	0.529879	-4.433
Cdk5rap3	CDK5RAP3	8.6545	503	0	0	0	0	0	40	0	0	0	0	0	0.184747	-2.88
Cdk9	CDK9	8.78739	372	0	0	0	0	0	56.6	0	0	0	0	0	0.353475	-3.266
Cdkl3	CDKL3	0.471375	595	15	0	0	0	0	0	0.084919	0	0	0	0	0	1.961
Cdkl5	CDKL5	6.2641	938	20	0	0	0	0	0	0.0718221	0	0	0	0	0	2.168
Cdkn1b	CDKN1B	19.1173	197	5	0	0	0	0	40	0.0854938	0	0	0	0	0.471714	-2.177
Cdkn2aip	CDKN2AIP	5.34847	563	0	0	0	0	60	60	0	0	0	0	0.373764	0.247587	-3.972
Cdr2	CDR2	25.0956	455	0	0	10	10	0	0	0	0	0.0957268	0.082171	0	0	2.129
Cds2	CDS2	28.9992	444	0	20	50	0	90	80	0	0.190456	0.490492	0	0.710908	0.418593	-1.357
Cdv3	CDV3	4.03834	215.25	4.25	0	0	2.5	0	0	0.0584357	0	0	0.0857518	0	0	1.251
Cecr5	CECR5	3.92359	419	0	20	0	0	0	0	0	0.20182	0	0	0	0	2.17
Celf1	CELF1	13.917	486	0	0	0	0	51	74.9	0	0	0	0	0.368034	0.358039	-4.025
Celf2	CELF2	3.6283	499.143	7.57143	0	0	2.8	10.4286	14.9286	0.0509168	0	0	0.0210123	0.0732148	0.0682509	-1.18514
Celf3	CELF3	43.1565	465	0	0	0	0	0	20	0	0	0	0	0	0.0999223	-2.203
Celf4	CELF4	9.59459	431.167	0	0	1.66667	10	0	3.3	0	0	0.0159195	0.0772079	0	0.0210322	0.692167
Cend1	CEND1	41.7322	149	0	0	20	0	0	0	0	0	0.58464	0	0	0	2.186
Cenpe	CENPE	1.21752	2471	0	0	0	50	0	0	0	0	0	0.0756532	0	0	2.995
Cenpj	CENPJ	1.63925	1344	0	0	40	0	0	0	0	0	0.12963	0	0	0	2.808
Cenpv	CENPV	3.47817	252	0	0	0	0	140	90	0	0	0	0	1.94842	0.829712	-4.659
Cep120	CEP120	20.0096	988	145	25	120	0	0	0	0.494358	0.106987	0.529017	0	0	0	4.726
Cep128	CEP128	1.16476	1102	25	0	0	0	0	0	0.0764169	0	0	0	0	0	2.403
Cep135	CEP135	3.54667	1140	435	0	150	0	0	0	1.28533	0	0.573102	0	0	0	5.419
Cep162	CEP162	4.31649	1403	0	10	0	0	0	0	0	0.0301364	0	0	0	0	1.588
Cep164	CEP164	5.18031	1333	10	0	70	0	0	0	0.0252697	0	0.228725	0	0	0	3.454
Cep170	CEP170	16.744	1578	0	0	0	0	0	40	0	0	0	0	0	0.0588896	-2.879
Cep250	CEP250	2.2593	2427.67	139.667	37	99	0	0	0	0.193808	0.0644419	0.177623	0	0	0	4.67767
Cep290	CEP290	34.0596	2479	640	1180	640	230	0	0	0.869629	2.01258	1.12447	0.346881	0	0	6.93
Cep350	CEP350	9.63139	3095	30	10	0	0	0	0	0.0326506	0.0136612	0	0	0	0	2.759
Cep57	CEP57	11.6446	500	25	0	70	0	0	0	0.168423	0	0.60978	0	0	0	3.644
Cep68	CEP68	6.41585	733	315	0	120	0	0	0	1.44756	0	0.713054	0	0	0	5.121
Cetn2	CETN2	22.4194	172	70	65	50	0	0	0	1.37088	1.59784	1.26615	0	0	0	4.256
Cetn3	CETN3	40.2822	167	20	40	30	0	0	0	0.403408	1.01273	0.782438	0	0	0	3.545
Cfdp1	CFDP1	49.2506	295	0	0	0	0	0	40	0	0	0	0	0	0.315009	-2.899
Cfl1	CFL1	221.366	166	123	170	131	134.9	119	163.3	2.4959	4.33002	3.43723	3.03832	2.51416	2.28541	0.185
Cfl2	CFL2	15.7124	166	58	0	51	64.9	79	53.3	1.17693	0	1.33816	1.46173	1.66906	0.745941	-0.221
Cftr	CFTR	0.526492	1476	0	0	0	0	0	10	0	0	0	0	0	0.0157398	-1.545
Cggbp1	CGGBP1	18.9802	167	0	0	0	0	40	10	0	0	0	0	0.840035	0.139113	-3.084
Chat	CHAT	2.68308	645	0	0	0	0	20	10	0	0	0	0	0.108749	0.0360185	-2.616
Chchd10	CHCHD10	62.3673	138	0	25	0	0	0	0	0	0.765966	0	0	0	0	2.374
Chchd2	CHCHD2	25.4213	153	11	3	8	0	2	0	0.242177	0.0829046	0.227742	0	0.0458451	0	1.696
Chchd3	CHCHD3	41.5137	227	105	165	230	60	70	50	1.5581	3.07331	4.41313	0.988224	1.0815	0.511717	1.045
Chchd5	CHCHD5	13.183	110	65	35	10	0	0	0	1.99045	1.34532	0.395961	0	0	0	3.751
Chchd6	CHCHD6	4.67069	259	40	0	20	0	0	0	0.521749	0	0.332765	0	0	0	3.177
Chd2	CHD2	12.7034	1827	0	0	0	0	60	60	0	0	0	0	0.115177	0.0762953	-3.96
Chd4	CHD4	46.6671	1915	0	0	0	0	580	530	0	0	0	0	1.06222	0.642973	-6.275
Chd6	CHD6	13.5767	2711	0	0	0	0	45	9.1	0	0	0	0	0.0582153	0.00779825	-3.144
Chd7	CHD7	21.1353	2986	45	0	0	0	55	22.5	0.0507637	0	0	0	0.0645992	0.0175056	-0.979
Chd8	CHD8	18.8868	2582	0	0	0	10	0	9.1	0	0	0	0.0144802	0	0.00818786	-0.236
Chd9	CHD9	17.207	2869	0	0	0	0	5	9.1	0	0	0	0	0.00611214	0.00736879	-1.817
Cherp	CHERP	12.8704	938	0	0	0	0	60	60	0	0	0	0	0.224338	0.148605	-4.01
Chid1	CHID1	4.71941	396	0	5	0	0	0	0	0	0.0533855	0	0	0	0	1.08
Chkb	CHKB	3.10369	394	0	0	0	20	0	0	0	0	0	0.189786	0	0	2.189
Chmp1a	CHMP1A	9.18003	196	0	40	30	20	20	0	0	0.862884	0.666669	0.381508	0.357872	0	0.983
Chmp1b	CHMP1B	6.56468	199	0	12	0	0	0	0	0	0.254963	0	0	0	0	1.753
Chmp2a	CHMP2A	77.2401	222	20	115	40	20	30	0	0.303464	2.19025	0.784788	0.336827	0.473939	0	1.354
Chmp2b	CHMP2B	14.6654	213	0	0	0	10	20	10	0	0	0	0.17553	0.32931	0.10907	-1.343
Chmp3	CHMP3	14.5082	224	0	45	0	20	0	0	0	0.849402	0	0.33382	0	0	3.247
Chmp4b	CHMP4B	41.5524	224	110	140	20	90	10	20	1.65415	2.64258	0.38889	1.50219	0.156569	0.207428	1.998
Chmp5	CHMP5	36.3098	219	75	0	0	20	0	0	1.15358	0	0	0.341441	0	0	3.615
Chmp6	CHMP6	7.48342	200	115	25	10	10	0	10	1.93686	0.528517	0.217779	0.186939	0	0.11616	2.218
Chpf	CHPF	3.64465	693	0	0	15	0	0	0	0	0	0.0955823	0	0	0	1.937
Chrna6	CHRNA6	22.0861	494	20	0	0	0	0	0	0.136375	0	0	0	0	0	2.189
Chtop	CHTOP	26.2728	224	0	35	140	0	10	10	0	0.660646	2.72223	0	0.156569	0.103714	1.701
Cic	CIC	4.3379	1603.67	0	0	0	0	0	6.66667	0	0	0	0	0	0.00965734	-1.128
Cirbp	CIRBP	82.629	172	10	5	20	0	100	80	0.19584	0.122911	0.506462	0	2.03904	1.08056	-2.127
Cisd1	CISD1	40.9664	108	155	115	70	0	60	80	4.83436	4.50218	2.82306	0	1.94842	1.72088	0.391
Cisd2	CISD2	16.6866	135	0	70	30	20	70	20	0	2.19237	0.967905	0.553893	1.81852	0.344177	-0.204
Ciz1	CIZ1	4.19958	808	0	0	0	0	12	0	0	0	0	0	0.0521226	0	-1.71625
Ckap4	CKAP4	15.4186	575	185	75	140	80	410	440	1.08376	0.551496	1.06049	0.520178	2.50075	1.77775	-1.07
Ckap5	CKAP5	16.3297	2021.5	0	139.5	65	30	130	220	0	0.291756	0.140054	0.0554867	0.225546	0.25284	-0.896
Ckb	CKB	400.538	381	870	507	563	1475	545	1200	7.69175	5.62641	6.43619	14.4743	5.01679	7.31714	0.172
Ckmt1	CKMT1A	78.1394	418	550	447	333	225	215	360	4.43218	4.52147	3.46987	2.0125	1.80392	2.00084	0.495
Ckmt2	CKMT2	0.011619	419	0	0	113	0	0	0	0	0	1.17465	0	0	0	3.784
Clasp1	CLASP1	13.0635	1488	22	26	16	14.1667	51	75	0.0498282	0.0739169	0.0468583	0.0344831	0.120267	0.113437	-0.667333
Clasp2	CLASP2	14.3299	1362.33	11.3333	24	42	28.9	117	124.2	0.0296742	0.0749262	0.135073	0.0797813	0.300249	0.21305	-1.32233
Clcc1	CLCC1	1.2239	541.5	0	0	0	0	5	5	0	0	0	0	0.0323843	0.0214519	-1.465
Clcn2	CLCN2	2.32483	908	10	0	0	0	0	0	0.0370975	0	0	0	0	0	1.596
Clcn3	CLCN3	1.97004	818	0	0	70	0	0	20	0	0	0.372726	0	0	0.0568018	0.766
Clcn4-2	CLCN4	27.6106	747	0	0	0	0	40	20	0	0	0	0	0.187799	0.0622006	-3.313
Clcn6	CLCN6	9.74681	870	0	40	50	0	0	10	0	0.194397	0.25032	0	0	0.0267034	1.668
Cldn1	CLDN1	1.58258	211	0	30	30	30	0	0	0	0.601156	0.619276	0.53158	0	0	3.569
Clic1	CLIC1	8.51164	241	100	90	125	210	30	50	1.3977	1.57897	2.25911	3.25786	0.436574	0.48199	1.386
Clic4	CLIC4	6.6322	253	0	15	95	30	0	0	0	0.25068	1.63549	0.443333	0	0	3.979
Clic6	CLIC6	1.29592	596	580	430	750	1030	0	0	3.27803	3.0505	5.481	6.46131	0	0	6.965
Clint1	CLINT1	13.3959	623	0	0	0	30	30	0	0	0	0	0.180038	0.168884	0	-0.436
Clip1	CLIP1	12.307	1391	0	35	20	10	0	0	0	0.106387	0.062625	0.0268784	0	0	3.252
Clip2	CLIP2	3.30578	1029.5	0	0	0	10	0	10	0	0	0	0.036327	0	0.0225728	-0.3225
Clip3	CLIP3	70.9611	547	20	0	0	0	0	0	0.123161	0	0	0	0	0	2.181
Cln6	CLN6	7.06733	308	0	10	20	0	30	40	0	0.137277	0.282829	0	0.341605	0.301713	-1.28
Clns1a	CLNS1A	8.87586	241	0	0	0	10	10	30	0	0	0	0.155136	0.145525	0.289194	-1.633
Clpb	CLPB	6.69023	677	10	0	0	0	0	0	0.0497556	0	0	0	0	0	1.579
Clpp	CLPP	15.9719	272	45	105	60	10	70	40	0.557281	1.63218	0.960788	0.137455	0.902575	0.341646	0.196
Clptm1	CLPTM1	25.5847	664	25	0	50	0	40	110	0.126824	0	0.32798	0	0.211274	0.384866	-1.168
Clpx	CLPX	5.11725	627	145	37	30	0	5	10	0.779086	0.249538	0.208427	0	0.0276589	0.0370571	2.201
Clstn1	CLSTN1	178.5	979	55	0	30	0	0	0	0.189239	0	0.13347	0	0	0	3.525
Clstn2	CLSTN2	4.1288	966	25	0	0	0	0	0	0.0871753	0	0	0	0	0	2.376
Clta	CLTA	26.7908	229.5	31	22	24.5	27.5	22.5	30	0.437346	0.40664	0.46392	0.425123	0.326278	0.303306	0.17025
Cltb	CLTB	39.1587	211	0	0	10	20	40	80	0	0	0.206425	0.354387	0.664862	0.880832	-1.825
Cltc	CLTC	77.7657	1675	850	860	880	1050	1530	3070	1.70937	2.17086	2.2883	2.34371	3.20354	4.25803	-0.735
Clu	CLU	70.4825	448	0	0	0	220	20	0	0	0	0	1.83601	0.156569	0	1.885
Clvs1	CLVS1	2.25679	354	0	0	0	0	10	10	0	0	0	0	0.099072	0.0656269	-2.17
Clvs2	CLVS2	1.12329	327	0	0	0	0	10	10	0	0	0	0	0.107252	0.0710457	-2.159
Clybl	CLYBL	4.16404	338	110	25	30	0	10	10	1.09624	0.312732	0.386589	0	0.103762	0.0687335	1.638
Cmas	CMAS	19.2998	432	0	0	0	0	210	170	0	0	0	0	1.70486	0.91422	-5.229
Cmc1	CMC1	5.73902	106	0	0	30	10	20	10	0	0	1.23271	0.352715	0.661726	0.219169	-0.152
Cmpk1	CMPK1	26.8545	227	95	30	60	90	50	120	1.40971	0.558784	1.15125	1.48234	0.772499	1.22812	-0.017
Cmtm4	CMTM4	5.48802	208	0	0	20	0	0	10	0	0	0.418805	0	0	0.111692	0.256
Cndp2	CNDP2	14.2386	475	0	75	40	180	80	120	0	0.6676	0.366785	1.4168	0.590677	0.586912	-0.107
Cnga1	CNGA1	174.442	684	775	580	320	260	0	0	3.8166	3.58526	2.03769	1.42117	0	0	6.586
Cnga3	CNGA3	3.80523	631	132	35	0	0	0	0	0.704653	0.234524	0	0	0	0	4.186
Cngb1	CNGB1	59.7378	825.5	774.5	730	390	570	0	40	4.02174	2.32946	1.28202	3.46747	0	0.0701341	4.6505
Cnih4	CNIH4	7.19273	139	0	0	0	0	0	10	0	0	0	0	0	0.167136	-1.555
Cnn1	CNN1	0.154289	297	40	0	0	0	10	0	0.453664	0	0	0	0.118086	0	0.898
Cnn2	CNN2	2.48108	305	27	0	0	0	0	0	0.298191	0	0	0	0	0	2.437
Cnn3	CNN3	44.8482	330	72	10	0	50	30	90	0.734936	0.128125	0	0.566482	0.318832	0.633598	-0.399
Cnnm2	CNNM2	2.88854	853	0	2	0	10	0	0	0	0.00991356	0	0.0438309	0	0	1.658
Cnnm3	CNNM3	2.20768	710.5	9.5	0	15	15	0	5	0.044998	0	0.0919555	0.0789337	0	0.0163492	1.4835
Cnnm4	CNNM4	7.09506	771	60	40	0	0	0	10	0.262137	0.219358	0	0	0	0.0301322	1.768
Cnot1	CNOT1	10.3763	2355.33	35	108	36	92.5	46	112.2	0.0497241	0.193889	0.0665778	0.146843	0.0685005	0.110678	0.028
Cnot10	CNOT10	15.1757	744	0	0	0	40	0	0	0	0	0	0.20101	0	0	2.795
Cnot2	CNOT2	10.8399	529.667	0	0	0	10	0	9.9	0	0	0	0.0679778	0	0.0435003	-0.811333
Cnot3	CNOT3	16.5658	751	0	65	50	20	0	20	0	0.36595	0.289985	0.099568	0	0.0618693	1.388
Cnot7	CNOT7	28.4086	285	35	0	0	30	0	0	0.41367	0	0	0.393556	0	0	3.261
Cnp	CNP	3.42869	410	0	20	35	40	55	30	0	0.206373	0.372038	0.364976	0.470751	0.170091	-0.381
Cnpy2	CNPY2	31.7257	182	80	80	30	0	60	50	1.48064	1.85852	0.717951	0	1.1562	0.63824	0.054
Cnpy3	CNPY3	16.1219	276	0	15	0	0	10	0	0	0.22979	0	0	0.127071	0	0.01
Cnrip1	CNRIP1	33.0647	164	25	110	70	30	110	70	0.513484	2.83594	1.85909	0.683923	2.35236	0.991607	-0.229
Cntfr	CNTFR	4.26033	372	0	0	0	20	0	20	0	0	0	0.20101	0	0.124903	-0.405
Cntln	CNTLN	8.40118	1396	60	0	0	0	0	0	0.144776	0	0	0	0	0	3.195
Cntn1	CNTN1	1.26102	1020	165	195	320	210	390	430	0.544897	0.80832	1.36645	0.769749	1.34097	0.979385	-0.418
Cntn4	CNTN4	7.62378	1026	0	0	0	0	0	60	0	0	0	0	0	0.135859	-3.302
Cntn5	CNTN5	1.00525	995.5	32	0	0	0	0	0	0.107677	0	0	0	0	0	2.5795
Cntnap1	CNTNAP1	5.94865	1385	0	25	0	20	170	110	0	0.0763201	0	0.0539896	0.43048	0.184514	-2.285
Cntnap2	CNTNAP2	4.41435	1332	0	0	0	0	10	0	0	0	0	0	0.0263299	0	-1.563
Cntrob	CNTROB	2.59941	887	215	185	150	0	0	0	0.81648	0.881854	0.736568	0	0	0	5.391
Coa3	COA3	29.6237	108	40	65	40	0	0	0	1.24758	2.54471	1.61317	0	0	0	4.017
Coa7	COA7	4.38491	231	0	20	0	0	10	0	0	0.366072	0	0	0.151825	0	0.267
Coasy	COASY	4.49731	563	0	0	0	0	0	10	0	0	0	0	0	0.0412645	-1.572
Cobra1	NELFB	8.97216	580	0	0	0	0	0	10	0	0	0	0	0	0.0400551	-1.531
Cog2	COG2	6.54315	731	0	0	0	0	0	10	0	0	0	0	0	0.031781	-1.548
Cog7	COG7	9.68956	770	0	0	0	0	0	20	0	0	0	0	0	0.0603427	-2.192
Coil	COIL	4.48179	573	0	0	0	0	20	10	0	0	0	0	0.122414	0.0405444	-2.592
Col18a1	COL18A1	4.27108	1421	72.5	22	0	0	55	45	0.15993	0.0658265	0	0	0.136504	0.0684635	-0.8245
Col1a1	COL1A1	0.296053	1453	0	0	0	0	0	30	0	0	0	0	0	0.0479668	-2.619
Col1a2	COL1A2	1.63248	1372	0	0	0	0	10	70	0	0	0	0	0.0255623	0.11853	-3.619
Col22a1	COL22A1	0.043689	1613	0	0	0	10	0	0	0	0	0	0.023179	0	0	1.622
Col25a1	COL25A1	0.656011	650.333	0	0	0	0	10	0	0	0	0	0	0.0539445	0	-1.54133
Col27a1	COL27A1	0.733584	1845	45	0	0	50	0	0	0.0821574	0	0	0.101322	0	0	3.619
Col2a1	COL2A1	4.52776	1453	132	0	0	0	40	20	0.30618	0	0	0	0.096602	0.0319954	0.3175
Col4a2	COL4A2	8.83123	1707	0	0	0	0	70	60	0	0	0	0	0.14382	0.0816588	-4.048
Col4a3bp	COL4A3BP	6.76084	611	10	0	0	0	0	0	0.0551552	0	0	0	0	0	1.6085
Col4a5	COL4A5	2.22604	1691	0	0	20	0	0	10	0	0	0.0515147	0	0	0.0137386	0.272
Col5a3	COL5A3	1.2665	1739	270	0	0	0	0	0	0.522992	0	0	0	0	0	4.656
Col6a1	COL6A1	8.62742	1025	0	25	0	0	70	60	0	0.103125	0	0	0.239513	0.135992	-2.046
Col6a3	COL6A3	0.098478	2980.5	0	0	0	10	55	115	0	0	0	0.0126756	0.0653965	0.0905776	-3.087
Col6a6	COL6A6	0.018843	1723.5	25	0	0	0	0	0	0.047399	0	0	0	0	0	2.3035
Col9a2	COL9A2	3.79022	688	0	0	0	0	0	20	0	0	0	0	0	0.0675347	-2.23
Commd2	COMMD2	4.17646	199	0	0	0	0	10	10	0	0	0	0	0.176239	0.116743	-2.157
Commd3	COMMD3	43.6245	195	0	0	0	0	10	0	0	0	0	0	0.179854	0	-1.574
Comt	COMT	2.68721	265	0	0	0	0	0	20	0	0	0	0	0	0.175335	-2.211
Comtd1	COMTD1	1.94589	262	5	0	0	0	0	10	0.0642835	0	0	0	0	0.0886715	-0.822
Copa	COPA	48.9603	1224	0	90	90	150	270	550	0	0.310892	0.320263	0.458184	0.773635	1.04392	-1.404
Copb1	COPB1	25.8505	953	50	55	0	0	80	220	0.176729	0.244016	0	0	0.294409	0.536309	-1.532
Copb2	COPB2	36.7968	905	0	80	0	80	100	240	0	0.373758	0	0.3305	0.38753	0.616095	-1.24
Cope	COPE	43.2802	308	50	5	20	30	40	40	0.546827	0.0686385	0.282829	0.364167	0.455474	0.301713	-0.226
Copg	COPG1	30.3127	874	0	0	0	0	70	140	0	0	0	0	0.280893	0.372136	-4.576
Copg2	COPG2	19.5434	871	0	5	0	0	40	120	0	0.0242717	0	0	0.161063	0.320073	-3.541
Cops2	COPS2	23.9259	443	0	0	0	0	0	180	0	0	0	0	0	0.943961	-4.37
Cops3	COPS3	39.5304	423	0	15	0	0	30	50	0	0.149934	0	0	0.248734	0.274609	-1.996
Cops4	COPS4	30.4332	406	90	25	40	100	90	180	0.746702	0.260353	0.42912	0.920882	0.777447	1.02999	-0.554
Cops5	COPS5	31.6362	334	40	40	0	60	50	50	0.403408	0.506363	0	0.671637	0.525022	0.347783	-0.151
Cops6	COPS6	39.3838	324	20	0	0	0	30	70	0.207929	0	0	0	0.324736	0.501924	-1.995
Cops7a	COPS7A	13.069	276	0	15	10	5	0	10	0	0.229793	0.157813	0.0677324	0	0.0841748	0.567
Cops8	COPS8	21.3573	209	10	55	20	50	20	50	0.16117	1.11267	0.416801	0.894445	0.335612	0.555788	0.163
Copz1	COPZ1	30.0865	177	0	10	0	30	20	50	0	0.238878	0	0.633691	0.396288	0.656269	-1.008
Coq3	COQ3	2.59967	370	40	0	0	0	0	0	0.364157	0	0	0	0	0	2.826
Coq5	COQ5	8.82446	327	20	0	0	0	0	0	0.206022	0	0	0	0	0	2.165
Coq6	COQ6	4.75783	476	40	0	0	0	20	0	0.283063	0	0	0	0.147359	0	0.236
Coq7	COQ7	17.9701	217	0	0	10	0	0	0	0	0	0.200718	0	0	0	1.604
Coq9	COQ9	9.88527	313	0	7	0	0	0	15	0	0.0945589	0	0	0	0.111335	-0.974
Coro1a	CORO1A	3.44973	461	0	0	0	0	0	10	0	0	0	0	0	0.0503946	-1.562
Coro1b	CORO1B	23.049	484	0	0	70	0	0	0	0	0	0.629938	0	0	0	3.347
Coro1c	CORO1C	17.2333	474	0	0	40	50	60	130	0	0	0.367559	0.394386	0.443943	0.637163	-1.226
Coro7	CORO7	8.55813	922	0	0	0	0	0	70	0	0	0	0	0	0.176381	-3.463
Cotl1	COTL1	27.3292	142	40	120	130	150	60	70	0.948861	3.57307	3.98749	3.94941	1.48189	1.14524	0.723
COX1	COX1	0	514	0	25	0	0	0	10	0	0.205649	0	0	0	0.0451983	0.468
Cox15	COX15	4.58906	413	0	0	0	0	0	10	0	0	0	0	0	0.0562517	-1.568
Cox17	COX17	37.1978	63	55	20	0	0	10	0	2.94071	1.34226	0	0	0.55669	0	1.48
Cox18	COX18	2.67922	332	0	0	0	20	0	0	0	0	0	0.225228	0	0	2.199
Cox19	COX19	12.856	92	0	0	0	0	0	10	0	0	0	0	0	0.252521	-1.554
COX2	COX2	0	227	200	125	180	40	180	180	2.9678	2.32827	3.45376	0.658816	2.781	1.84218	-0.084
Cox4i1	COX4I1	206.081	169	160	265	250	70	180	330	3.18907	6.62991	6.44315	1.54861	3.73542	4.53641	-0.122
Cox4i2	COX4I2	20.2337	172	0	0	10	0	0	0	0	0	0.253231	0	0	0	1.624
Cox5a	COX5A	66.6359	146	310	255	230	60	190	260	7.1522	7.38475	6.86152	1.53648	4.5641	4.13719	0.142
Cox6a1	COX6A1	353.256	112	35	15	0	0	0	0	1.05264	0.566268	0	0	0	0	2.988
Cox6b1	COX6B1	197.193	86	75	290	220	50	120	50	2.93761	14.2577	11.1422	2.17371	4.89369	1.35069	0.822
Cox6c	COX6C	304.151	76	85	100	100	50	140	190	3.76735	5.56333	5.73102	2.45972	6.46053	5.80798	-0.486
Cox7a2	COX7A2	89.096	83	65	65	30	10	40	60	2.63795	3.31119	1.5743	0.450455	1.69019	1.67942	0.034
Cox7a2l	COX7A2L	43.9201	122.5	12.5	17	5	0	10	5	0.353287	0.591978	0.179359	0	0.288843	0.0956673	0.3765
Cp	CP	14.7814	1073.5	122	50	105	140	70	125	0.382867	0.196959	0.42608	0.487657	0.228723	0.270553	0.261
Cpd	CPD	4.71743	1377	25	110	130	40	0	0	0.0611557	0.337759	0.411201	0.108607	0	0	4.763
Cpe	CPE	205.33	476	60	30	30	50	10	10	0.424595	0.266479	0.274511	0.392729	0.0736796	0.0488066	1.663
Cpeb3	CPEB3	5.55549	716	0	0	0	0	0	30	0	0	0	0	0	0.0973405	-2.617
Cplx2	CPLX2	54.7076	134	0	0	0	40	0	40	0	0	0	1.11605	0	0.693491	-0.454
Cplx3	CPLX3	78.6528	158	5	25	0	0	50	70	0.106597	0.669008	0	0	1.10986	1.02926	-1.831
Cplx4	CPLX4	137.544	160	25	10	20	30	10	0	0.526321	0.264258	0.544446	0.701021	0.219197	0	1.581
Cpne1	CPNE1	2.4436	536	0	5	0	0	0	0	0	0.0394415	0	0	0	0	1.122
Cpne2	CPNE2	1.59607	548	0	0	15	0	0	0	0	0	0.119222	0	0	0	1.941
Cpne3	CPNE3	5.04486	533	0	20	40	90	40	0	0	0.158654	0.326872	0.631314	0.263201	0	0.812
Cpne4	CPNE4	4.64909	557	0	0	40	0	0	0	0	0	0.312788	0	0	0	2.801
Cpne5	CPNE5	3.84961	593	41	0	16	60	18	35	0.232895	0	0.11752	0.378291	0.106456	0.137119	0.305
Cpne6	CPNE6	3.26691	556.5	0	0	6	0	0	15	0	0	0.0469604	0	0	0.0626198	-1.0845
Cpne7	CPNE7	1.17956	557	0	0	15	0	0	0	0	0	0.117295	0	0	0	1.944
Cpne8	CPNE8	3.84086	577	11	0	6	0	18	25	0.0642166	0	0.0452919	0	0.109408	0.100658	-1.33
Cpne9	CPNE9	3.92695	553	21	0	6	0	13	0	0.127916	0	0.0472576	0	0.0824465	0	0.251
Cpox	CPOX	5.97299	443	100	0	0	0	0	0	0.760374	0	0	0	0	0	3.68
Cpped1	CPPED1	9.61812	312	20	0	0	0	0	20	0.215927	0	0	0	0	0.148923	-0.404
Cpsf1	CPSF1	5.06434	1445.5	0	0	0	0	130	130	0	0	0	0	0.315416	0.208937	-4.704
Cpsf2	CPSF2	9.55856	782	0	0	0	0	0	50	0	0	0	0	0	0.148542	-3.141
Cpsf3	CPSF3	17.6126	684	0	0	0	0	90	60	0	0	0	0	0.461467	0.203789	-4.163
Cpsf3l	CPSF3L	8.10337	600	0	0	0	0	20	10	0	0	0	0	0.116905	0.0387199	-2.585
Cpsf4	CPSF4	5.11989	211	0	0	0	0	10	0	0	0	0	0	0.166216	0	-1.568
Cpsf6	CPSF6	21.6364	551	0	0	0	0	110	130	0	0	0	0	0.700157	0.548122	-4.632
Cpsf7	CPSF7	10.4579	466.5	0	0	0	0	75	60	0	0	0	0	0.563903	0.298831	-4.084
Cpt1a	CPT1A	36.8918	773	155	80	0	0	80	190	0.675434	0.437582	0	0	0.362965	0.571031	-0.629
Cpt2	CPT2	6.72488	658	225	140	110	60	50	180	1.15183	0.899603	0.728135	0.340922	0.266501	0.635524	0.345
Crabp1	CRABP1	37.7865	137	0	95	60	40	60	60	0	2.93192	1.90755	1.09161	1.53598	1.01746	-0.008
Crb1	CRB1	34.6198	1405	0	35	0	0	0	0	0	0.105327	0	0	0	0	2.672
Crb2	CRB2	6.6809	1282	0	0	30	50	0	0	0	0	0.101924	0.145818	0	0	3.462
Creb1	CREB1	4.57317	318.333	0	0	0	0	9	16.5	0	0	0	0	0.0996904	0.121067	-2.43467
Creld1	CRELD1	8.12135	420	0	0	0	0	0	10	0	0	0	0	0	0.0553141	-1.56
Crem	CREM	0.546041	200	0	0	0	0	4	0	0	0	0	0	0.0823967	0	-0.7224
Crip2	CRIP2	7.18165	208	10	0	0	0	0	0	0.161945	0	0	0	0	0	1.617
Crk	CRK	25.847	304	50	30	0	50	0	90	0.554022	0.41725	0	0.614931	0	0.687788	-0.135
Crkl	CRKL	7.07476	303	0	0	0	0	0	50	0	0	0	0	0	0.383365	-3.128
Crlf3	CRLF3	10.8844	442	0	0	0	10	0	10	0	0	0	0.0845878	0	0.0525609	-0.312
Crmp1	CRMP1	22.0317	629	115	109	133	212.3	283	482.8	0.618507	0.671817	0.928597	1.27236	1.58591	1.78954	-0.813
Crnkl1	CRNKL1	8.77143	690	0	0	0	0	60	110	0	0	0	0	0.304969	0.370364	-4.283
Crocc	CROCC	27.9214	2009	2365	2167	3260	950	220	440	3.96535	4.56066	7.06778	1.76796	0.384058	0.508813	2.085
Crocc2	CROCC2	0.0509525	1710	5	0	0	0	0	0	0.00984928	0	0	0	0	0	1.0875
Crot	CROT	15.0582	612	0	0	0	0	20	10	0	0	0	0	0.114613	0.0379607	-2.576
Crtac1	CRTAC1	6.02186	646	20	0	0	0	10	0	0.104287	0	0	0	0.0542902	0	0.266
Crtc3	CRTC3	7.10661	619	0	0	0	0	10	0	0	0	0	0	0.0566583	0	-1.536
Crx	CRX	183.302	311	0	0	0	0	45	0	0	0	0	0	0.508222	0	-3.0115
Cryaa	CRYAA	69.6828	196	35	85	20	230	20	1010	0.60151	1.83363	0.444446	4.38734	0.357872	11.9716	-1.521
Cryab	CRYAB	44.2687	175	0	40	0	130	0	850	0	0.96643	0	2.77738	0	11.2841	-2.096
Cryba1	CRYBA1	51.6032	215	0	35	0	150	0	1052.5	0	0.688301	0	2.60845	0	11.3728	-2.228
Cryba2	CRYBA2	9.51385	197	0	0	0	10	0	182.5	0	0	0	0.189786	0	2.1522	-3.153
Cryba4	CRYBA4	4.94775	196	0	0	0	60	0	370	0	0	0	1.14452	0	4.38562	-2.283
Crybb1	CRYBB1	5.93283	250	0	45	0	90	0	942.5	0	0.761064	0	1.34596	0	8.75844	-2.429
Crybb2	CRYBB2	22.4136	205	0	25	10	70	0	722.5	0	0.515626	0.212467	1.27666	0	8.18784	-2.424
Crybb3	CRYBB3	6.13852	211	0	30	0	170	0	1310	0	0.601156	0	3.01229	0	14.4236	-2.37
Cryga	CRYGA	22.554	174	0	20	0	0	0	409.9	0	0.485992	0	0	0	5.47286	-3.402
Crygb	CRYGB	16.4424	175	0	36	0	30	0	296.3	0	0.869787	0	0.640934	0	3.9335	-1.986
Crygc	CRYGC	5.34471	174.5	0	28.5	0	5	0	209.8	0	0.690734	0	0.107129	0	2.79318	-2.294
Crygd	CRYGD	17.1118	174	0	0	0	0	0	356.4	0	0	0	0	0	4.75854	-5.192
Cryge	CRYGD	9.9825	174	0	0	0	0	0	376.4	0	0	0	0	0	5.02557	-5.253
Crygn	CRYGN	1.80473	183	0	0	0	30	0	60	0	0	0	0.612915	0	0.761703	-1.12
Crygs	CRYGS	9.40057	178	0	0	0	20	0	535	0	0	0	0.420088	0	6.98263	-3.682
Crym	CRYM	57.553	313	275	160	180	210	270	410	2.95951	2.16135	2.5048	2.50845	3.02533	3.04316	-0.306
Cryz	CRYZ	5.01908	331	70	40	30	30	20	60	0.712362	0.510953	0.394765	0.338862	0.211912	0.421123	0.259
Cs	CS	50.3858	464	467	392	335	185	267	350	3.39023	3.57204	3.14465	1.49068	2.01812	1.75241	0.304
Csad	CSAD	4.41397	493	0	20	0	40	20	0	0	0.171527	0	0.303349	0.142278	0	0.597
Csda	CSDA	71.1433	326.5	76	83	112	76.6	15	0	0.709148	1.03024	1.35131	0.887057	0.145726	0	3.1395
Csdc2	CSDC2	29.3135	154	0	0	0	10	0	0	0	0	0	0.242778	0	0	1.618
Csde1	CSDE1	34.7577	782.5	0	10	0	0	0	20	0	0.0551256	0	0	0	0.0594021	-1.3205
Cse1l	CSE1L	25.9805	971	25	0	70	0	80	290	0.0867264	0	0.313996	0	0.288951	0.693848	-1.841
Csk	CSK	12.6306	450	0	0	0	0	0	20	0	0	0	0	0	0.103253	-2.222
Csl	N/A	1.03098	466	0	0	0	0	87	130	0	0	0	0	0.654768	0.648101	-4.666
Csnk1a1	CSNK1A1	69.5618	325	90	50	70	30	90	50	0.932803	0.650482	0.938123	0.345118	0.97121	0.357414	0.039
Csnk1d	CSNK1D	9.15811	412	7	2.5	5	0	20	10	0.0572341	0.0254707	0.0528617	0	0.169019	0.0559806	-0.024
Csnk1e	CSNK1E	17.3917	416	0	0	0	0	0	10	0	0	0	0	0	0.055846	-1.54
Csnk1g1	CSNK1G1	13.0685	459	40	0	0	0	0	0	0.293547	0	0	0	0	0	2.825
Csnk1g3	CSNK1G3	16.101	424	65	0	0	0	0	0	0.516391	0	0	0	0	0	3.292
Csnk2a1	CSNK2A1	23.8883	391	30	20	80	130	45	110	0.258449	0.216273	0.891166	1.24307	0.403636	0.653584	0.017
Csnk2a2	CSNK2A2	5.35872	350	0	0	0	30	35	0	0	0	0	0.320467	0.350715	0	-0.581
Csnk2b	CSNK2B	49.6698	215	65	25	40	90	20	0	1.01837	0.491643	0.810339	1.56507	0.326246	0	1.869
Cspg4	CSPG4	0.652585	2327	265	260	100	210	0	0	0.383601	0.472417	0.187175	0.337406	0	0	5.785
Cspg5	CSPG5	14.6103	552.5	52.5	47	60	235	0	15	0.328096	0.359893	0.472322	1.59368	0	0.0631108	2.721
Csrp1	CSRP1	7.28402	193	60	20	30	0	10	0	1.04719	0.438149	0.677032	0	0.181717	0	1.849
Cst3	CST3	474.796	140	15	50	30	0	10	0	0.360906	1.51005	0.933337	0	0.250511	0	1.71
Cstb	CSTB	16.8117	98	0	30	10	0	10	0	0	1.29433	0.444446	0	0.357872	0	0.881
Cstf1	CSTF1	8.83136	431	0	0	0	0	90	70	0	0	0	0	0.732351	0.377317	-4.26
Cstf2	CSTF2	8.91515	580	0	0	0	0	100	65	0	0	0	0	0.604681	0.260358	-4.291
Cstf2t	CSTF2T	17.3842	632	0	0	0	0	70	15	0	0	0	0	0.38845	0.0551391	-3.639
Cstf3	CSTF3	8.32559	717	0	0	0	0	100	90	0	0	0	0	0.489142	0.291614	-4.378
Ctage5	CTAGE5	6.79275	772	0	0	10	20	0	0	0	0	0.0564193	0.0968596	0	0	2.505
Ctbp1	CTBP1	8.27708	435	18	16	0	12.5	47	42.5	0.139407	0.155543	0	0.107453	0.374202	0.227015	-0.982
Ctbp2	CTBP2	40.0846	988	118	60	100	0	379	540	0.402305	0.256769	0.440847	0	1.34535	1.26976	-1.691
Ctcf	CTCF	23.8602	736	0	0	0	0	10	30	0	0	0	0	0.0476515	0.0946954	-2.891
Ctdspl2	CTDSPL2	13.5529	465	0	0	0	0	40	10	0	0	0	0	0.30169	0.0499611	-3.116
Cth	CTH	3.78285	398	0	0	0	0	20	20	0	0	0	0	0.176239	0.116743	-2.903
Ctnna1	CTNNA1	26.5225	906	0	88	213	163.2	393	359.8	0	0.41068	1.02399	0.673475	1.52131	0.92261	-0.982
Ctnna2	CTNNA2	5.90354	929	0	45	173	33.2	68	124.8	0	0.204944	0.811644	0.133703	0.256884	0.312302	-0.228
Ctnnb1	CTNNB1	79.1763	781	160	155	220	300	305	470	0.69008	0.83913	1.22692	1.43615	1.36963	1.39808	-0.424
Ctnnbl1	CTNNBL1	8.69421	563	0	0	0	0	80	120	0	0	0	0	0.498351	0.495174	-4.475
Ctnnd1	CTNND1	3.52943	899	0	0	27	12.5	42.5	15	0	0	0.127569	0.0513005	0.158906	0.0388478	-0.59175
Ctnnd2	CTNND2	13.1628	1246	0	0	100	0	126	79.9	0	0	0.349564	0	0.354655	0.148975	-1.192
Ctps	CTPS1	6.41788	591	0	0	0	0	0	20	0	0	0	0	0	0.0786191	-2.235
Ctps2	CTPS2	1.28393	560.5	0	0	0	0	0	5	0	0	0	0	0	0.0207673	-0.92
Ctr9	CTR9	25.679	1173	0	0	0	0	20	50	0	0	0	0	0.0597979	0.0990279	-3.403
Ctsa	CTSA	7.15518	483	0	0	0	0	20	5	0	0	0	0	0.145274	0.024058	-2.391
Ctsb	CTSB	39.224	339	0	0	0	80	30	60	0	0	0	0.882308	0.310367	0.411185	-0.579
Ctsc	CTSC	7.90854	462	0	10	0	0	50	0	0	0.091518	0	0	0.379561	0	-1.889
Ctsd	CTSD	105.645	410	75	132	60	110	90	145	0.616181	1.36125	0.637401	1.00309	0.769862	0.821617	-0.025
Ctsh	CTSH	4.76541	333	0	0	0	0	10	0	0	0	0	0	0.10532	0	-1.548
Ctsz	CTSZ	12.8851	306	0	0	0	0	0	10	0	0	0	0	0	0.0759214	-1.555
Cttn	CTTN	8.9196	527.5	0	0	40	35	68	68.3	0	0	0.330687	0.248376	0.452663	0.301174	-1.0745
Cul1	CUL1	32.5727	776	0	0	30	0	50	80	0	0	0.168385	0	0.225976	0.239504	-1.874
Cul2	CUL2	9.41759	745	0	0	0	0	10	90	0	0	0	0	0.0470758	0.280654	-3.781
Cul3	CUL3	85.506	768	0	95	70	80	60	230	0	0.523011	0.396992	0.389456	0.273996	0.695748	-0.661
Cul4a	CUL4A	32.1086	759	0	0	20	5	40	90	0	0	0.114771	0.0246296	0.18483	0.275477	-2.082
Cul4b	CUL4B	9.4897	970	0	0	0	5	0	0	0	0	0	0.0192721	0	0	1.121
Cul5	CUL5	9.74184	841.5	0	0	0	55	25	140	0	0	0	0.244428	0.10422	0.386608	-1.546
Cul7	CUL7	6.93516	1689	35	0	0	0	0	0	0.0698022	0	0	0	0	0	2.67
Cux1	CUX1	12.5702	1051	27.5	0	50	0	0	0	0.0649597	0	0.322158	0	0	0	3.386
Cwc15	CWC15	44.2552	229	0	0	0	0	60	50	0	0	0	0	0.918903	0.507247	-3.946
Cwc22	CWC22	4.5897	905	0	0	0	0	20	0	0	0	0	0	0.0775069	0	-2.221
Cwc27	CWC27	8.9314	469	0	0	0	0	0	10	0	0	0	0	0	0.049535	-1.568
Cxadr	CXADR	6.12141	358.5	32.5	25	15	55	35	35	0.299931	0.289598	0.182301	0.563378	0.336302	0.222772	0.9815
Cyb5	CYB5A	16.7841	134	0	0	10	10	30	0	0	0	0.325043	0.279013	0.785182	0	-0.846
Cyb5b	CYB5B	18.2061	146	20	5	0	10	40	60	0.461432	0.144799	0	0.256081	0.960862	0.954737	-1.521
Cyb5r1	CYB5R1	5.94857	305	45	0	0	10	10	0	0.496985	0	0	0.122583	0.114988	0	1.184
Cyb5r3	CYB5R3	14.3832	301	55	40	0	80	80	170	0.615498	0.561878	0	0.993695	0.932132	1.3121	-0.85
Cyc1	CYC1	36.1936	325	190	170	210	70	140	280	1.96925	2.21164	2.81437	0.805275	1.51077	2.00152	-0.078
Cycs	CYCS	19.324	105	115	195	100	190	130	190	3.68926	7.85225	4.14816	6.76541	4.34218	4.20387	0.132
Cyct	N/A	0.073027	105	0	75	0	0	0	0	0	3.0201	0	0	0	0	3.395
Cyfip1	CYFIP1	2.71761	1252	0	28	40	45	52.5	95	0	0.0945212	0.139045	0.134274	0.146948	0.17614	0.5195
Cyfip2	CYFIP2	31.887	1253	0	62	0	80	75	210	0	0.209213	0	0.238709	0.209925	0.389362	-1.189
Cygb	CYGB	18.2703	190	0	0	10	0	30	50	0	0	0.229241	0	0.55376	0.611367	-2.332
Cyp20a1	CYP20A1	5.10527	462	0	0	0	0	0	10	0	0	0	0	0	0.0502856	-1.55
Cyp2s1	CYP2S1	1.16043	501	0	0	0	0	0	10	0	0	0	0	0	0.0463711	-1.524
Cyp51	CYP51A1	8.83125	503	0	0	0	0	30	0	0	0	0	0	0.209174	0	-2.633
Cyth1	CYTH1	4.33456	398.333	0	0	1	0	5	0	0	0	0.0109346	0	0.0438393	0	-0.399667
Cyth2	CYTH2	8.6613	399.5	0	0	1	0	7.5	10	0	0	0.0109026	0	0.0659238	0.0581526	-1.9885
Cyth3	CYTH3	3.84782	375	0	0	1	0	15	0	0	0	0.0116626	0	0.131848	0	-1.1215
D030016E14Rik	TRAPPC11	13.0397	1133	0	0	0	20	0	70	0	0	0	0.0659979	0	0.143534	-1.635
D10Wsu52e	C22orf28	26.1181	505	0	40	0	30	100	210	0	0.334902	0	0.222106	0.694485	0.96608	-1.969
D14Abb1e	FAM208A	6.81885	1569	0	0	0	0	10	15	0	0	0	0	0.0223986	0.0212487	-2.2195
D15Ertd621e	FAM91A1	10.6364	837	0	0	0	0	10	0	0	0	0	0	0.0419014	0	-1.554
D17Wsu104e	C19orf10	15.3155	166	45	35	0	10	30	10	0.913135	0.891474	0	0.225228	0.633822	0.139951	0.336
D19Wsu162e	WBP1L	1.48535	348	0	0	30	0	0	0	0	0	0.37548	0	0	0	2.565
D1Pas1	DDX3X	0	660	22	44	0	0	0	0	0.112282	0.281876	0	0	0	0	3.25
D3Bwg0562e	LPPR4	8.68902	766	30	0	0	0	30	10	0.131924	0	0	0	0.137356	0.0303289	-0.691
D630037F22Rik	C6orf170	4.61174	1296	0	0	0	10	0	0	0	0	0	0.0288486	0	0	1.597
D630045J12Rik	KIAA1549	9.73485	1940	305	130	40	20	0	0	0.529577	0.283329	0.0898056	0.0385441	0	0	5.231
Daam1	DAAM1	2.93797	1077	0	0	40	30	0	30	0	0	0.161767	0.104144	0	0.0647129	0.359
Dab1	DAB1	5.56613	386	20	0	20	0	0	0	0.215921	0	0.218077	0	0	0	2.7505
Dab2ip	DAB2IP	5.04935	1148.33	0	0	12.6667	0	10	23.1	0	0	0.0478083	0	0.0305603	0.0467628	-1.31233
Dad1	DAD1	0.53708	113	55	55	40	10	80	40	1.63951	2.05794	1.5418	0.330865	2.48294	0.822369	-0.212
Dak	DAK	5.12207	578	0	0	0	0	0	40	0	0	0	0	0	0.160775	-2.905
Dapk1	DAPK1	5.99709	1430	0	0	0	0	20	0	0	0	0	0	0.049051	0	-2.222
Dapl1	DAPL1	95.0875	107	0	0	0	0	10	0	0	0	0	0	0.327771	0	-1.553
Dars	DARS	20.5358	501	250	70	80	160	150	270	1.68087	0.590757	0.6955	1.19402	1.05004	1.25202	-0.213
Dazap1	DAZAP1	4.79234	405.667	0	0	0	0	16	9.9	0	0	0	0	0.138326	0.0566959	-2.44833
Dbi	DBI	166.786	87	55	75	80	220	80	250	2.12948	3.64494	4.00512	9.45438	3.22496	6.67584	-0.234
Dbn1	DBN1	8.0399	675.667	0	0	23	6.6	26	59.5	0	0	0.148412	0.0365569	0.13509	0.204785	-1.501
Dbnl	DBNL	3.98283	433.667	0	0	13	0	0	36.3	0	0	0.130569	0	0	0.194466	-1.35267
Dbr1	DBR1	4.95345	550	0	0	0	0	0	10	0	0	0	0	0	0.0422399	-1.541
Dbt	DBT	3.89555	482	70	0	0	0	0	10	0.489195	0	0	0	0	0.048199	1.429
Dcaf7	DCAF7	53.6621	342	0	0	0	0	20	0	0	0	0	0	0.205096	0	-2.217
Dcaf8	DCAF8	30.3998	591	0	30	0	20	30	20	0	0.214626	0	0.126524	0.178028	0.0786191	-0.457
Dcakd	DCAKD	33.7186	231	0	50	60	0	90	50	0	0.91518	1.13132	0	1.36642	0.502856	-0.727
Dcbld2	DCBLD2	6.04859	769	0	0	20	0	0	0	0	0	0.113279	0	0	0	2.169
Dcc	DCC	3.50588	1447	0	0	0	0	30	0	0	0	0	0	0.0727121	0	-2.623
Dchs1	DCHS1	2.22883	3291	0	0	0	0	30	0	0	0	0	0	0.0319704	0	-2.611
Dclk1	DCLK1	2.7456	619.667	0	9.33333	23.3333	0	42	30	0	0.0647525	0.135885	0	0.249986	0.0931869	-1.382
Dclk2	DCLK2	1.62594	717	0	0	2.66667	0	10.3333	6.5	0	0	0.0159141	0	0.050282	0.0212304	-1.63167
Dcps	DCPS	15.1363	338	0	0	0	0	0	70	0	0	0	0	0	0.481135	-3.44
Dct	DCT	25.9837	517	0	0	0	40	0	170	0	0	0	0.289267	0	0.763913	-1.887
Dctn1	DCTN1	33.0808	1261.33	74	33.6667	42	99.1667	48.6667	159.1	0.197896	0.112975	0.145059	0.294088	0.135426	0.293258	-0.319
Dctn2	DCTN2	14.5567	404.333	39	37	29	69.4	42	69.4	0.324913	0.386921	0.312403	0.641743	0.364313	0.398764	-0.0473333
Dctn3	DCTN3	14.855	172.5	17	42.5	30	20	35	25	0.334009	0.966106	0.702512	0.436153	0.659947	0.312257	1.322
Dctn4	DCTN4	18.6639	460	0	15	50	40	50	110	0	0.137874	0.473432	0.325111	0.381212	0.555546	-0.913
Dda1	DDA1	15.6988	102	0	0	0	0	0	10	0	0	0	0	0	0.227764	-1.52
Ddah1	DDAH1	23.8562	285	55	60	70	100	90	90	0.650053	0.890133	1.06979	1.31185	1.10752	0.73364	-0.04
Ddah2	DDAH2	8.87927	285	205	155	220	170	160	300	2.42292	2.29951	3.3622	2.23015	1.96892	2.44547	-0.009
Ddb1	DDB1	141.793	1140	80	165	160	330	370	670	0.236383	0.611967	0.611308	1.08228	1.13828	1.36539	-0.846
Ddhd1	DDHD1	8.59266	886	0	0	0	0	3	9.9	0	0	0	0	0.0118849	0.0259801	-1.718
Ddi2	DDI2	11.2403	399	5	0	0	0	0	30	0.0422112	0	0	0	0	0.174676	-1.886
Ddost	DDOST	19.9477	441	130	35	50	10	180	110	0.992969	0.335566	0.493829	0.0847796	1.43149	0.579481	-0.752
Ddr1	DDR1	2.18968	892.5	0	0	0	5	0	5	0	0	0	0.0209545	0	0.0130207	-0.1775
Ddt	DDT	25.4875	118	75	135	90	210	60	100	2.14097	4.83727	3.32205	6.65376	1.7833	1.96881	0.663
Ddx1	DDX1	56.5352	740	75	35	20	50	180	340	0.341397	0.199979	0.117718	0.25262	0.85309	1.06741	-1.56
Ddx17	DDX17	28.7859	569.667	0	14	0	0	331.333	278.133	0	0.109098	0	0	1.785	0.992564	-2.38333
Ddx18	DDX18	8.24982	660	0	0	70	0	0	10	0	0	0.461955	0	0	0.0351999	1.425
Ddx19a	DDX19A	16.5436	478	0	0	2	2.5	40	160	0	0	0.0182241	0.0195543	0.293485	0.777638	-3.988
Ddx19b	DDX19B	2.38899	480	0	0	2	2.5	0	0	0	0	0.0181578	0.0194831	0	0	0.892667
Ddx20	DDX20	5.16672	825	0	25	10	0	0	0	0	0.128125	0.0527948	0	0	0	2.639
Ddx21	DDX21	9.46819	851	212	90	80	10	160	200	0.839145	0.447159	0.409454	0.0439339	0.659393	0.545991	-0.417
Ddx23	DDX23	21.4162	819	0	30	110	0	260	240	0	0.154877	0.584997	0	1.11338	0.680789	-1.764
Ddx24	DDX24	11.4467	880	0	0	10	0	0	0	0	0	0.049529	0	0	0	1.5845
Ddx39	DDX39A	5.28396	427	32	0	20	0	190	220	0.252437	0	0.204008	0	1.56056	1.19696	-2.544
Ddx39b	DDX39B	36.8766	428	37	0	0	0	400	450	0.291198	0	0	0	3.27771	2.44261	-3.548
Ddx3x	DDX3X	75.5829	662	255	49	140	150	560	500	1.29752	0.312958	0.921118	0.847155	2.96677	1.75468	-1.076
Ddx3y	DDX3Y	11.6899	658	0	54	0	0	0	0	0	0.34699	0	0	0	0	3.067
Ddx41	DDX41	9.09661	622	0	0	0	0	50	20	0	0	0	0	0.281925	0.0747008	-3.418
Ddx42	DDX42	21.8827	929	0	0	0	0	100	240	0	0	0	0	0.377519	0.600179	-5.04
Ddx46	DDX46	20.2541	1031	0	0	0	0	280	270	0	0	0	0	0.952475	0.608402	-5.449
Ddx47	DDX47	14.0907	455	0	0	0	0	30	0	0	0	0	0	0.23124	0	-2.619
Ddx5	DDX5	347.056	615	302	37	125	50	832	752.2	1.6541	0.254375	0.885279	0.303966	4.74463	2.84147	-1.631
Ddx50	DDX50	20.8814	734	42	0	40	0	30	0	0.192745	0	0.237361	0	0.143344	0	0.507
Ddx6	DDX6	14.2218	483	0	0	0	0	70	110	0	0	0	0	0.508282	0.529092	-4.44
Decr1	DECR1	4.46873	335	0	25	20	40	20	50	0	0.315532	0.260034	0.446421	0.209382	0.346745	-0.294
Degs1	DEGS1	16.6104	323	0	0	0	0	0	10	0	0	0	0	0	0.0719255	-1.537
Dek	DEK	28.3359	380	0	0	0	0	170	180	0	0	0	0	1.56899	1.10046	-5.077
Dennd1a	DENND1A	16.0373	1016	0	0	10	0	0	0	0	0	0.0428698	0	0	0	1.603
Depdc1a	DEPDC1	0.025485	804	0	0	0	0	20	0	0	0	0	0	0.0872425	0	-2.2
Derl1	DERL1	9.25605	251	50	0	0	0	0	10	0.671007	0	0	0	0	0.0925575	1.111
Des	DES	0.37352	469	0	0	0	0	167	82.5	0	0	0	0	1.24881	0.408664	-4.701
Desi1	DESI1	40.587	168	0	25	0	0	0	0	0	0.629186	0	0	0	0	2.376
Dgke	DGKE	28.1727	564	10	0	0	0	70	60	0.0597244	0	0	0	0.435284	0.247148	-2.83
Dgkz	DGKZ	7.91632	929	0	0	0	0	0	10	0	0	0	0	0	0.0250075	-1.557
Dguok	DGUOK	4.0279	256.5	10	30	0	0	0	5	0.132168	0.497698	0	0	0	0.0455775	1.51
Dhcr7	DHCR7	9.12364	471	0	0	0	0	20	30	0	0	0	0	0.148923	0.147974	-3.091
Dhdh	DHDH	21.9439	333	0	10	0	80	0	30	0	0.126971	0	0.898205	0	0.209297	0.597
Dhh	DHH	1.58722	396	0	10	0	10	10	0	0	0.106771	0	0.0944136	0.0885643	0	0.221
Dhodh	DHODH	2.83871	395	25	0	20	0	10	10	0.213193	0	0.220535	0	0.0887885	0.058815	0.371
Dhrs1	DHRS1	10.3578	313	0	0	20	10	100	60	0	0	0.278311	0.11945	1.12049	0.445341	-2.111
Dhrs13	DHRS13	4.99596	376	0	0	0	0	50	10	0	0	0	0	0.466376	0.0617871	-3.254
Dhrs4	DHRS4	2.83006	279	65	35	40	20	40	0	0.784766	0.530411	0.624455	0.268013	0.502817	0	0.87
Dhrs7	DHRS7	8.94487	338	0	0	0	0	80	0	0	0	0	0	0.830094	0	-3.586
Dhrs7b	DHRS7B	3.29197	318.5	0	0	0	5	0	0	0	0	0	0.0587053	0	0	1.096
Dhx15	DHX15	21.637	749	0	12.5	0	0	255.5	325	0	0.0664801	0	0	1.20017	0.949733	-4.3935
Dhx16	DHX16	8.30531	1044	0	0	0	0	90	80	0	0	0	0	0.30234	0.178022	-4.255
Dhx29	DHX29	7.99002	1365	20	50	0	50	30	0	0.0493547	0.154877	0	0.136952	0.0770802	0	0.879
Dhx30	DHX30	5.80351	1211.33	0	80	69.3333	105.7	36	36.3	0	0.283292	0.249385	0.326278	0.104241	0.0696265	0.683
Dhx35	DHX35	4.53661	679	0	0	0	0	20	10	0	0	0	0	0.103303	0.0342149	-2.573
Dhx36	DHX36	19.0153	1001	0	35	80	10	70	70	0	0.147837	0.348098	0.0373504	0.245255	0.162461	-0.605
Dhx8	DHX8	10.2804	1244	0	0	0	0	53	20	0	0	0	0	0.14942	0.0373504	-3.459
Dhx9	DHX9	46.5284	1383	160	220	370	300	1510	1660	0.389698	0.672588	1.16526	0.811015	3.82921	2.7885	-1.606
Diablo	DIABLO	9.8456	237	0	25	0	0	0	0	0	0.446006	0	0	0	0	2.375
Dido1	DIDO1	4.91964	1719.5	0	0	0	0	90	35	0	0	0	0	0.139913	0.052388	-3.6735
Dip2a	DIP2A	4.3866	1562	0	0	0	10	15	30	0	0	0	0.0239358	0.0336794	0.0446196	-1.754
Dip2b	DIP2B	3.76023	1457	0	52	15	77.5	17.5	102.5	0	0.144844	0.041508	0.184089	0.0458023	0.151288	-0.55
Dip2c	DIP2C	7.04052	1556	0	0	0	15	0	55	0	0	0	0.0360422	0	0.082118	-1.648
Diras1	DIRAS1	8.88956	198	0	0	0	0	40	0	0	0	0	0	0.708515	0	-2.873
Diras2	DIRAS2	27.5998	199	5	5	10	0	20	20	0.0846346	0.106235	0.218873	0	0.352477	0.233487	-1.147
Dis3	DIS3	6.1155	958	0	0	0	0	10	150	0	0	0	0	0.0366091	0.363757	-4.258
Dis3l	DIS3L	4.22983	970	0	0	0	0	10	0	0	0	0	0	0.0361562	0	-1.553
Dis3l2	DIS3L2	5.703	877	0	0	0	10	0	0	0	0	0	0.0426342	0	0	1.6015
Dkc1	DKC1	8.63462	509	0	55	40	0	120	80	0	0.456871	0.342285	0	0.826832	0.365138	-1.22
Dkk3	DKK3	80.897	349	15	10	0	20	0	30	0.144776	0.12115	0	0.214257	0	0.199701	-0.098
Dlat	DLAT	9.30096	642	335	275	300	150	190	250	1.75768	1.81112	2.03531	0.873546	1.03794	0.90467	0.38
Dld	DLD	48.059	509	475	205	250	170	120	300	3.14345	1.70288	2.13928	1.24871	0.826832	1.36927	0.463
Dlg1	DLG1	3.58049	886.2	31.2	13	19.6	30.8	20	41.04	0.117394	0.0623968	0.096336	0.128119	0.080223	0.106078	-0.0872
Dlg2	DLG2	15.1217	593	3	0	0	33	45	94.4	0.0118608	0	0	0.229883	0.328878	0.437134	-1.832
Dlg3	DLG3	1.89996	732	0	0	6.66667	3.33333	6	3.33333	0	0	0.0344883	0.0148022	0.030362	0.00919776	-0.381667
Dlg4	DLG4	53.9313	722.5	40.5	40	40	65	40	112.8	0.188429	0.234085	0.24114	0.336362	0.194168	0.362709	-0.3265
Dlg5	DLG5	4.40788	1909.5	0	5	0	0	0	0	0	0.0110717	0	0	0	0	1.0965
Dlst	DLST	26.58	454	320	190	160	90	140	120	2.37424	1.76948	1.535	0.741168	1.0815	0.61406	0.576
Dmap1	DMAP1	8.29657	468	0	0	0	0	50	50	0	0	0	0	0.374695	0.248204	-3.765
Dmd	DMD	22.8668	3678	0	55	110	20	130	50	0	0.0632266	0.130265	0.0203305	0.123961	0.0315823	-0.465
Dmwd	DMWD	19.8076	665	0	0	20	0	10	0	0	0	0.130995	0	0.0527391	0	0.264
Dmxl1	DMXL1	9.21254	3013	0	0	0	0	0	20	0	0	0	0	0	0.0154211	-2.222
Dmxl2	DMXL2	41.1801	3054	0	120	0	0	190	550	0	0.166135	0	0	0.218192	0.418388	-2.301
Dnahc14	DNAH14	0.008214	4601	0	0	0	25	0	0	0	0	0	0.020315	0	0	2.3735
Dnahc3	DNAH3	0.0106453	4004.67	0	0	11	0	0	0	0	0	0.0119754	0	0	0	1.674
Dnahc7a	DNAH7	0.334642	4024	0	9	0	0	0	0	0	0.00945656	0	0	0	0	1.51
Dnahc7b	DNAH7	1.92569	4068	0	9	37	0	0	0	0	0.00935428	0.0396156	0	0	0	2.908
Dnahc7c	DNAH7	0.560852	4092	0	9	17	0	0	0	0	0.00929941	0.018095	0	0	0	2.36
Dnahc8	DNAH8	0.135422	4731	0	0	0	0	30	0	0	0	0	0	0.0222394	0	-2.644
Dnahc9	DNAH9	1.50579	4484	0	0	30	0	0	0	0	0	0.0291408	0	0	0	2.539
Dnaja1	DNAJA1	3.64492	397	70	20	30	40	50	40	0.593934	0.213004	0.329136	0.376703	0.441706	0.234075	0.079
Dnaja2	DNAJA2	33.1795	412	0	55	0	0	20	40	0	0.564435	0	0	0.17025	0.225553	-0.538
Dnaja3	DNAJA3	5.29073	466.5	30	7	15	0	0	5	0.216802	0.0634978	0.136112	0	0	0.0249211	1.72
Dnaja4	DNAJA4	7.64332	397	0	0	0	10	0	10	0	0	0	0.0941758	0	0.0585187	-0.324
Dnajb1	DNAJB1	11.2231	340	55	0	0	0	0	10	0.544897	0	0	0	0	0.0683292	1.197
Dnajb11	DNAJB11	0.091568	358	5	10	20	0	70	30	0.0470455	0.118104	0.243328	0	0.685755	0.194681	-1.53
Dnajb12	DNAJB12	19.8502	376	0	0	0	0	0	10	0	0	0	0	0	0.0617871	-1.563
Dnajb2	DNAJB2	5.80658	300.5	0	0	0	10	0	0	0	0	0	0.125184	0	0	1.6065
Dnajb6	DNAJB6	18.7701	277.25	1.25	8.75	0	2.5	2	2.5	0.017399	0.101359	0	0.034707	0.0260454	0.0215661	0.402
Dnajc10	DNAJC10	12.4737	793	0	0	40	20	50	90	0	0	0.219701	0.0942946	0.221132	0.263666	-1.315
Dnajc11	DNAJC11	11.9023	559	0	0	0	0	30	50	0	0	0	0	0.188219	0.207799	-3.541
Dnajc13	DNAJC13	11.5761	2243	0	305	340	80	0	210	0	0.574936	0.660229	0.133349	0	0.217508	0.738
Dnajc16	DNAJC16	7.55894	772	0	0	0	0	0	10	0	0	0	0	0	0.0300932	-1.565
Dnajc19	DNAJC19	7.48945	136.5	0	17	5	0	0	0	0	0.538732	0.163226	0	0	0	2.2295
Dnajc19-ps	N/A	5.5844	116	0	17	5	0	0	0	0	0.61964	0.18774	0	0	0	2.245
Dnajc24	DNAJC24	7.98146	148	0	10	0	0	0	0	0	0.285685	0	0	0	0	1.611
Dnajc3	DNAJC3	9.11586	504	35	25	0	0	10	0	0.23392	0.209729	0	0	0.0695863	0	1.257
Dnajc5	DNAJC5	55.7514	198	45	50	40	10	0	0	0.765558	1.06771	0.879913	0.188827	0	0	4.035
Dnajc6	DNAJC6	5.58464	935.333	0	4	12.3333	13.2	19.3333	35.5	0	0.0180979	0.0569462	0.0528109	0.0730368	0.0882538	-1.095
Dnajc7	DNAJC7	45.7018	494	0	0	0	0	0	10	0	0	0	0	0	0.0470282	-1.543
Dnajc8	DNAJC8	53.2866	253	0	0	0	0	10	50	0	0	0	0	0.138622	0.459129	-3.264
Dnajc9	DNAJC9	12.5534	259	0	0	0	0	0	50	0	0	0	0	0	0.448493	-3.139
Dnm1	DNM1	70.088	864	148	214	295	444	434	879.7	0.577004	1.04725	1.48715	1.92132	1.76169	2.36541	-0.676
Dnm1l	DNM1L	19.7048	705.5	12	5	35	40	30	110	0.0572996	0.0296919	0.216099	0.211997	0.149147	0.362258	-0.915
Dnm2	DNM2	3.65357	866.25	0	25.25	19	44.925	33.75	96.075	0	0.123227	0.0955354	0.193885	0.136633	0.257645	-0.0425
Dnm3	DNM3	13.5605	861	48	84.5	52	157.5	118	306.7	0.187789	0.41493	0.263056	0.683927	0.480657	0.827558	-0.716
Dnmt1	DNMT1	3.30082	1560.5	0	0	0	0	12	30	0	0	0	0	0.027008	0.0447264	-2.927
Dnmt3a	DNMT3A	36.0165	908	0	0	0	0	564	600	0	0	0	0	2.17845	1.53515	-6.335
Dnmt3b	DNMT3B	0.0952796	826	0	0	0	0	16	0	0	0	0	0	0.0680529	0	-2.0108
Dnpep	DNPEP	9.99942	474	92	7	25	60	25	70	0.653721	0.0624411	0.229725	0.473265	0.184977	0.343089	0.1635
Dntt	DNTT	0.000196	530	0	0	10	0	0	0	0	0	0.0821806	0	0	0	1.58
Dnttip2	DNTTIP2	28.6044	758	0	0	0	0	30	30	0	0	0	0	0.138805	0.091947	-3.256
Dock1	DOCK1	2.2749	1865	0	0	0	50	0	0	0	0	0	0.100235	0	0	3
Dock3	DOCK3	6.45788	2030	10	0	0	0	0	10	0.0165934	0	0	0	0	0.0114443	-0.32
Dock7	DOCK7	8.54868	2098	0	0	50	0	0	60	0	0	0.103803	0	0	0.0664402	-0.637
Dock8	DOCK8	0.58016	2100	30	0	0	0	0	0	0.0481208	0	0	0	0	0	2.538
Dock9	DOCK9	2.29966	2067	0	0	17.5	12.5	0	0	0	0	0.0367666	0.0226138	0	0	2.4975
Dpf1	DPF1	2.1591	388	0	0	0	0	0	20	0	0	0	0	0	0.119752	-2.222
Dpf3	DPF3	29.3585	356	0	0	0	0	0	20	0	0	0	0	0	0.130516	-2.232
Dpm1	DPM1	9.73463	260	0	45	50	0	90	30	0	0.731792	0.83761	0	1.21401	0.268061	-0.716
Dpm3	DPM3	26.2999	92	0	0	10	0	20	10	0	0	0.473432	0	0.762423	0.252521	-1.341
Dpp10	DPP10	5.83643	800	0	5	0	0	35	0	0	0.0264258	0	0	0.153438	0	-2.029
Dpp3	DPP3	10.1082	738	15	40	0	80	60	190	0.0684645	0.229167	0	0.405288	0.285134	0.598112	-1.108
Dpp4	DPP4	0.263791	744.5	40	45	30	125	0	25	0.177287	0.255673	0.175586	0.628005	0	0.0780457	1.727
Dpp6	DPP6	5.30113	816.75	0.75	4.25	25	7.5	26.25	60	0.00308038	0.0216965	0.133436	0.0343619	0.107174	0.162272	1.31975
Dpp7	DPP7	4.38291	506	0	0	0	0	0	10	0	0	0	0	0	0.0459129	-1.579
Dpy19l1	DPY19L1	7.77834	746	0	0	0	0	40	0	0	0	0	0	0.188051	0	-2.89
Dpy19l2	DPY19L2	0	773	0	0	0	10	0	0	0	0	0	0.0483671	0	0	1.593
Dpy30	DPY30	0.12449	99	0	0	0	0	0	20	0	0	0	0	0	0.469332	-2.254
Dpysl2	DPYSL2	37.0289	572	476	460	586	999.9	991	1536.6	2.80312	3.40025	4.46218	6.53567	6.07619	6.24094	-0.502
Dpysl3	DPYSL3	47.9051	569	322	184	218	339.1	283.5	494	1.90621	1.3674	1.66895	2.22816	1.74739	2.01343	0.0745
Dpysl4	DPYSL4	28.9965	572	174	85	199	366.5	343	898.1	1.02467	0.628306	1.51531	2.39556	2.10306	3.64766	-0.909
Dpysl5	DPYSL5	16.8774	564	65	60	0	180	240	490	0.388208	0.449801	0	1.19323	1.4924	2.01838	-1.368
Drap1	DRAP1	51.6245	205	0	0	0	0	0	10	0	0	0	0	0	0.113327	-1.546
Drg1	DRG1	18.2083	367	0	0	0	0	40	15	0	0	0	0	0.38225	0.0949534	-3.185
Drg2	DRG2	15.0897	364	0	0	10	0	30	55	0	0	0.119659	0	0.289051	0.351032	-2.409
Dsg1a	DSG1	0.030146	1057	0	0	0	10	0	0	0	0	0	0.0353716	0	0	1.592
Dsg1b	DSG1	0.014613	1060	0	0	0	10	0	0	0	0	0	0.0352715	0	0	1.597
Dsg2	DSG2	0.439357	1122	0	0	0	0	0	10	0	0	0	0	0	0.0207058	-1.523
Dsp	DSP	0.051251	2883	185	0	30	180	20	110	0.216151	0	0.0453233	0.233431	0.0243298	0.0886407	0.619
Dst	DST	5.41443	6386	0	49.5	100	2.5	60	0	0	0.0302368	0.0589148	0.0012643	0.0333478	0	-0.254
Dstn	DSTN	103.936	165	88	90	86	39.9	59	33.3	1.79651	2.30625	2.27018	0.904105	1.25407	0.468863	0.698
Dtd1	DTD1	14.12	209	0	0	20	0	10	0	0	0	0.416801	0	0.167806	0	0.27
Dtna	DTNA	4.32062	682	0	0	0	0	0	3.3	0	0	0	0	0	0.0112413	-0.582
Dtnb	DTNB	1.47443	630.5	0	0	0	0	0	3.3	0	0	0	0	0	0.0121844	-0.5455
Dtymk	DTYMK	9.87144	212	25	25	60	0	20	0	0.397223	0.498601	1.23271	0	0.330863	0	1.186
Dus3l	DUS3L	8.98174	637	0	0	0	0	10	50	0	0	0	0	0.0550573	0.182354	-3.282
Dusp3	DUSP3	11.8093	185	0	20	0	20	10	30	0	0.457095	0	0.404192	0.189576	0.376734	-0.447
Dut	DUT	4.65941	181	24.5	0	0	0	0	0	0.446216	0	0	0	0	0	2.336
Dym	DYM	12.1956	669	0	0	0	0	10	0	0	0	0	0	0.0524237	0	-1.524
Dync1h1	DYNC1H1	55.4948	4644	180	1865	140	260	1570	4670	0.13056	1.69799	0.131305	0.20932	1.18566	2.3362	-1.437
Dync1i1	DYNC1I1	1.48718	615	0	0	0	2	2	2	0	0	0	0.0121628	0.0114093	0.0075577	-0.2194
Dync1i2	DYNC1I2	7.29091	633.4	16.2	5.8	29.8	7.92	6	17.94	0.0845357	0.0380505	0.205227	0.0458722	0.0332459	0.0645657	0.6494
Dync1li1	DYNC1LI1	41.4339	523	110	65	50	100	70	160	0.70847	0.525485	0.416403	0.714872	0.469408	0.710728	-0.156
Dync1li2	DYNC1LI2	22.6884	492	20	0	0	0	50	50	0.136929	0	0	0	0.356417	0.236097	-1.976
Dync2h1	DYNC2H1	6.67305	4306	0	30	0	0	0	0	0	0.0294575	0	0	0	0	2.541
Dynll1	DYNLL1	43.1169	89	0	20	0	0	0	0	0	0.950142	0	0	0	0	2.16
Dynll2	DYNLL2	1.58088	89	35	0	0	40	40	60	1.32467	0	0	1.68035	1.57625	1.5662	-0.761
Dynlrb1	DYNLRB1	185.203	96	15	30	40	30	50	40	0.526321	1.32129	1.81482	1.16837	1.82664	0.967997	-0.254
Dyrk1a	DYRK1A	2.21437	763	0	0	0	0	30	0	0	0	0	0	0.137896	0	-2.612
Dyrk1b	DYRK1B	9.44895	609	0	2	0	0	0	0	0	0.0139005	0	0	0	0	0.6005
Dyrk2	DYRK2	47.9716	599	0	35	40	0	0	0	0	0.247053	0.290856	0	0	0	3.371
Dysf	DYSF	0.226011	2099.5	0	0	0	0	0	10	0	0	0	0	0	0.0110655	-1.549
Dyx1c1	DYX1C1	3.80718	420	0	0	0	0	20	0	0	0	0	0	0.167007	0	-2.228
E230008N13Rik	C9orf174	0.414537	1664	0	40	0	0	0	0	0	0.101638	0	0	0	0	2.798
Ebf1	EBF1	8.07855	591	0	0	0	0	0	2	0	0	0	0	0	0.00786191	-0.115
Ebf2	EBF2	0.13825	575	0	0	0	0	0	2	0	0	0	0	0	0.00808067	-0.114
Ebf3	EBF3	3.95867	578	0	0	0	0	0	2	0	0	0	0	0	0.00804803	-0.140333
Ebna1bp2	EBNA1BP2	12.1825	306	0	5	0	0	0	10	0	0.0690871	0	0	0	0.0759214	-0.821
Ebp	EBP	7.96277	230	0	0	0	0	80	40	0	0	0	0	1.21988	0.404034	-3.993
Ebpl	EBPL	31.4524	206	10	0	10	0	0	0	0.163517	0	0.211436	0	0	0	2.123
Ech1	ECH1	12.8452	327	0	25	30	30	20	10	0	0.323252	0.399594	0.343007	0.214504	0.0710457	0.566
Echdc1	ECHDC1	0.775953	310.5	0	7	0	0	0	5	0	0.0954512	0	0	0	0.0374619	0.0585
Echs1	ECHS1	12.2821	290	235	230	160	60	110	120	2.72961	3.35335	2.40307	0.77354	1.3303	0.961321	0.593
Eci1	ECI1	9.57033	289	145	150	140	20	40	80	1.69006	2.19453	2.10997	0.258739	0.485418	0.643099	0.835
Eci2	ECI2	6.28494	374.5	52	17	0	0	5	15	0.450758	0.192305	0	0	0.0448484	0.0932328	0.529
Ecsit	ECSIT	2.76195	435	0	0	10	0	0	0	0	0	0.100128	0	0	0	1.594
Edc4	EDC4	8.06789	1390	260	120	0	80	0	110	0.630071	0.365019	0	0.215182	0	0.18385	0.927
Edem1	EDEM1	2.02162	652	0	5	0	0	0	0	0	0.0324243	0	0	0	0	1.099
Edem3	EDEM3	13.0877	931	0	0	0	0	0	10	0	0	0	0	0	0.0249537	-1.542
Edf1	EDF1	67.7143	148	35	60	40	0	40	50	0.796594	1.71411	1.17718	0	0.947878	0.784863	-0.085
Eea1	EEA1	6.88086	1411	0	0	0	40	0	0	0	0	0	0.105989	0	0	2.809
Eed	EED	9.55078	441	0	0	0	0	20	0	0	0	0	0	0.159054	0	-2.226
Eef1a1	EEF1A1	1194.03	462	372	255	410	510	395	590	2.71226	2.33371	3.86533	4.12722	2.99854	2.96685	-0.046
Eef1a2	EEF1A2	50.2405	463	207	60	0	210	195	340	1.50598	0.547922	0	1.69577	1.47709	1.70602	-0.611
Eef1b2	EEF1B2	23.2789	225	30	42	30	40	40	70	0.449127	0.789252	0.580743	0.664672	0.623493	0.722771	-0.245
Eef1d	EEF1D	5.30203	470.5	61	41	50	25	65	65	0.73123	0.50891	0.329968	0.237126	0.345401	0.228799	1.658
Eef1e1	EEF1E1	21.7534	174	0	40	20	0	10	20	0	0.971985	0.50064	0	0.20156	0.267034	0.235
Eef1g	EEF1G	89.0246	437	300	145	180	170	210	910	2.31244	1.40293	1.79406	1.45444	1.68536	4.83777	-0.844
Eef2	EEF2	315.477	858	465	231	256	626.6	326	693.3	1.82556	1.13834	1.29956	2.73044	1.33255	1.87724	-0.062
Eefsec	EEFSEC	3.27698	583	0	0	0	0	0	10	0	0	0	0	0	0.0398489	-1.552
Efhd2	EFHD2	6.43354	240	0	15	0	0	0	30	0	0.264258	0	0	0	0.290399	-1.038
Efnb1	EFNB1	4.1319	345	0	0	0	0	30	10	0	0	0	0	0.304969	0.0673389	-2.873
Efnb2	EFNB2	6.91075	336	0	0	10	0	0	0	0	0	0.12963	0	0	0	1.583
Efr3a	EFR3A	21.2751	819	0	40	30	70	60	50	0	0.206502	0.159545	0.319554	0.256934	0.141831	-0.249
Eftud1	EFTUD1	2.05465	1127	0	0	0	0	0	10	0	0	0	0	0	0.020614	-1.563
Eftud2	EFTUD2	9.83761	971.5	37.5	36	36	51.6	269	398.3	0.129956	0.156678	0.161401	0.198581	0.971099	0.952474	-1.947
Egf	EGF	0.600455	1217	0	0	0	10	0	0	0	0	0	0.0307213	0	0	1.609
Egflam	EGFLAM	35.7184	1009	0	0	0	0	0	30	0	0	0	0	0	0.0690741	-2.604
Egfr	EGFR	1.76601	1210	0	0	0	30	0	0	0	0	0	0.092697	0	0	2.54
Ehbp1	EHBP1	7.5868	1206	0	0	0	10	0	0	0	0	0	0.0310015	0	0	1.602
Ehd1	EHD1	7.02015	534	0	0	0	70	0	50	0	0	0	0.490102	0	0.217527	-0.135
Ehd3	EHD3	8.7662	535	30	0	0	75	55	75	0.188885	0	0	0.524128	0.360548	0.325681	-0.693
Ehd4	EHD4	7.69013	541	0	30	0	135	15	55	0	0.234462	0	0.932967	0.0972407	0.236184	0.371
Ehmt2	EHMT2	9.66228	1217.5	20	0	0	0	5	0	0.0574822	0	0	0	0.0144232	0	0.3125
Eif1	EIF1	89.2383	113	5	0	0	0	0	0	0.149047	0	0	0	0	0	1.102
Eif2a	EIF2A	15.8762	581	0	0	20	10	50	50	0	0	0.149934	0.0643508	0.30182	0.199931	-1.645
Eif2b1	EIF2B1	7.23354	305	0	0	0	0	0	20	0	0	0	0	0	0.152341	-2.212
Eif2b3	EIF2B3	5.26743	448.5	0	0	0	0	0	20	0	0	0	0	0	0.103605	-2.2265
Eif2b4	EIF2B4	5.09046	534	0	0	0	0	0	10	0	0	0	0	0	0.0435208	-1.572
Eif2b5	EIF2B5	12.5124	717	0	0	0	0	40	30	0	0	0	0	0.195657	0.0972047	-3.446
Eif2c1	EIF2C1	9.23163	857	0	100	65	40	90	48.2	0	0.493364	0.330353	0.174505	0.368312	0.130663	-0.097
Eif2c2	EIF2C2	7.80853	860	0	110	95	110	120	173.2	0	0.540808	0.481139	0.478216	0.489369	0.46788	-0.424
Eif2c3	EIF2C3	3.79641	860	0	0	0	0	0	28.2	0	0	0	0	0	0.0761791	-2.578
Eif2s1	EIF2S1	9.52078	315	75	0	0	0	130	90	0.802013	0	0	0	1.44739	0.66377	-1.542
Eif2s2	EIF2S2	22.421	331	0	0	0	0	3	25	0	0	0	0	0.0317868	0.175468	-2.539
Eif2s3x	EIF2S3	39.1204	472	0	28	50	20	65	100	0	0.250821	0.461395	0.158423	0.482976	0.492202	-1.011
Eif2s3y	N/A	29.6358	472	0	0	0	0	35	0	0	0	0	0	0.260064	0	-2.77
Eif3a	EIF3A	33.1607	1344	0	185	150	240	80	250	0	0.581997	0.486113	0.667639	0.208759	0.432142	0.058
Eif3b	EIF3B	18.0361	803	50	70	70	150	50	240	0.209742	0.368579	0.379689	0.698402	0.218378	0.694354	-0.34
Eif3c	EIF3C	64.0134	911	135	110	100	140	100	260	0.499167	0.510532	0.478109	0.574565	0.384978	0.663041	-0.201
Eif3d	EIF3D	29.7824	548	45	25	0	100	40	40	0.276607	0.192889	0	0.682259	0.255996	0.169576	0.263
Eif3e	EIF3E	61.449	445	70	30	70	60	90	110	0.529869	0.285043	0.685146	0.504105	0.709311	0.574273	-0.358
Eif3f	EIF3F	54.345	361	115	60	50	120	50	150	1.07305	0.702737	0.603265	1.24281	0.485755	0.965316	0.045
Eif3g	EIF3G	32.3857	320	15	0	20	20	0	30	0.157896	0	0.272223	0.233674	0	0.217799	0.097
Eif3h	EIF3H	90.399	352	30	20	20	30	10	40	0.287084	0.240235	0.247476	0.318646	0.0996349	0.263999	0.194
Eif3i	EIF3I	40.7972	325	0	15	20	60	0	40	0	0.195145	0.268035	0.690236	0	0.285931	0.361
Eif3j1	EIF3J	14.7441	261	55	0	0	0	0	15	0.709828	0	0	0	0	0.133517	0.808
Eif3j2	EIF3J	8.19243	263	70	0	0	0	0	15	0.896547	0	0	0	0	0.132502	1.046
Eif3k	EIF3K	76.0558	218	0	10	0	0	0	10	0	0.193951	0	0	0	0.106569	-0.314
Eif3l	EIF3L	33.4861	564	0	50	10	110	130	230	0	0.374834	0.0772264	0.729194	0.808385	0.947402	-1.247
Eif3m	EIF3M	35.2135	374	0	0	0	0	0	20	0	0	0	0	0	0.124235	-2.223
Eif4a1	EIF4A1	54.7466	385	124	52	82.5	101.15	79	99	1.05703	0.572777	0.885061	0.931472	0.721796	0.599175	-0.111
Eif4a2	EIF4A2	39.2711	384.5	77	9	0	92.3	59	89	0.676885	0.0993081	0	0.900585	0.540007	0.539596	-0.3075
Eif4a3	EIF4A3	32.6153	411	111	87	95	62.5	452	314	0.909729	0.895006	1.00676	0.568549	3.85701	1.7749	-1.266
Eif4b	EIF4B	42.5433	611	40	35	60	0	0	40	0.220521	0.242201	0.427716	0	0	0.152091	0.71
Eif4e	EIF4E	26.4483	217	0	0	0	10	10	0	0	0	0	0.172294	0.16162	0	-0.314
Eif4g1	EIF4G1	15.9819	1596.5	0	2	0	12	27	75	0	0.00529678	0	0.0281025	0.0593131	0.109139	-2.3695
Eif4g2	EIF4G2	67.1318	887	0	17.5	35	10	65	70	0	0.0816692	0.171945	0.0412669	0.257124	0.179496	-1.183
Eif4g3	EIF4G3	11.4478	1536.33	0	16.3333	13.3333	11.9	8	36.6667	0	0.0442422	0.0370608	0.0289927	0.0182833	0.0541716	-0.579333
Eif4h	EIF4H	52.578	248	50	65	70	30	80	70	0.679124	1.10818	1.2294	0.452272	1.13134	0.65574	-0.139
Eif5a	EIF5A	2e-06	154	65	47	15	110	40	80	1.42175	1.2904	0.424244	2.67056	0.910947	1.20685	0.184
Eif5a2	EIF5A2	3.90748	153	0	12	15	0	0	0	0	0.331618	0.427017	0	0	0	2.395
Eif5b	EIF5B	12.7953	1216	0	0	0	0	10	70	0	0	0	0	0.0288417	0.133736	-3.563
Eif6	EIF6	9.1399	245	0	0	10	0	10	20	0	0	0.177778	0	0.143149	0.189648	-1.35
Elavl1	ELAVL1	9.7881	326	107	110	62	40	350	450	1.1056	1.42667	0.82836	0.458746	3.76534	3.20686	-1.419
Elavl2	ELAVL2	1.80653	359.75	10.25	10	26.25	42.45	18	12.05	0.095946	0.117497	0.314296	0.436235	0.175594	0.0765156	0.45875
Elavl3	ELAVL3	21.795	367	90	83	49	110.5	61	44.8	0.826052	0.956226	0.581534	1.12571	0.582932	0.283594	0.652
Elavl4	ELAVL4	3.0653	373	25.25	26.5	21.75	31.65	22.35	13.9	0.227911	0.300391	0.250236	0.312571	0.207056	0.085246	1.076
Elf2	ELF2	15.1443	593	0	0	0	0	0	40	0	0	0	0	0	0.156708	-2.908
Elfn2	ELFN2	5.00512	823	0	0	0	0	10	20	0	0	0	0	0.0426142	0.0564567	-2.587
Elmo2	ELMO2	5.35789	750	0	0	6	3.3	13.3333	6.66667	0	0	0.0349155	0.0164841	0.0617731	0.0194085	-0.481
Elmod2	ELMOD2	20.5935	293	95	40	50	0	30	20	1.09216	0.57722	0.743272	0	0.359094	0.15858	0.82
Eln	ELN	5.44015	860	810	0	0	0	0	0	3.17261	0	0	0	0	0	5.751
Elovl4	ELOVL4	7.1665	312	0	0	0	0	20	0	0	0	0	0	0.224817	0	-2.188
Elp2	ELP2	25.5996	831	0	0	0	40	20	90	0	0	0	0.179965	0.0844079	0.251609	-1.441
Elp3	ELP3	8.73621	556.5	0	0	5	0	5	20	0	0	0.039145	0	0.0315199	0.0835174	-1.6565
Emb	EMB	5.13091	330	0	0	0	30	10	20	0	0	0	0.339889	0.106277	0.1408	-0.399
Emc1	EMC1	4.61038	995.5	2.5	0	25	0	75	100	0.00847197	0	0.109415	0	0.264252	0.23337	-2.3025
Emc10	EMC10	20.1884	268	0	0	0	0	50	10	0	0	0	0	0.654319	0.0866863	-3.258
Emc2	EMC2	19.1752	297	65	60	50	40	50	70	0.737204	0.854168	0.733261	0.503539	0.590429	0.547554	0.086
Emc3	EMC3	17.4598	261	30	15	0	10	70	50	0.387179	0.242996	0	0.143248	0.940614	0.445056	-1.263
Emc4	EMC4	45.9592	183	0	25	40	0	40	0	0	0.577614	0.952037	0	0.76659	0	0.002
Emc6	EMC6	14.5061	110	0	0	40	0	10	0	0	0	1.58384	0	0.318832	0	0.897
Emc7	EMC7	37.6203	241	0	0	20	0	30	30	0	0	0.361458	0	0.436574	0.289194	-1.473
Emc8	EMC8	9.56195	207	20	10	0	0	30	20	0.325455	0.204258	0	0	0.508282	0.224463	-0.946
Emd	EMD	11.464	259	0	0	0	0	20	0	0	0	0	0	0.270822	0	-2.223
Eml1	EML1	8.1043	798.5	0	2	0	0	0	10	0	0.0105942	0	0	0	0.0291054	-1.3065
Eml3	EML3	24.6641	897	0	0	30	20	0	60	0	0	0.145671	0.0833619	0	0.155398	-0.657
Eml4	EML4	2.71495	927.667	0	0	3.33333	0	0	3.3	0	0	0.0146949	0	0	0.00828456	-0.131667
Eml5	EML5	35.0263	1977	0	0	0	10	0	0	0	0	0	0.0189114	0	0	1.593
Enah	ENAH	5.47337	729.75	0	0	0	2.5	0	7.5	0	0	0	0.0131641	0	0.0245396	-0.94125
Endod1	ENDOD1	6.4448	501	0	0	30	0	70	40	0	0	0.260813	0	0.490021	0.185484	-1.711
Endog	ENDOG	2.29366	294	0	65	40	0	30	30	0	0.934791	0.592595	0	0.357872	0.237061	0.079
Engase	ENGASE	1.97963	734	0	0	0	0	20	30	0	0	0	0	0.0955626	0.0949534	-3.088
Eno1b	ENO1	237.559	434	1090	820	1125	2223.3	823	1911.6	8.45994	7.98864	11.2904	19.1531	6.65065	10.2328	0.154
Eno2	ENO2	80.6297	434	205	185	225	473.3	208	441.6	1.59109	1.80231	2.25807	4.07734	1.68084	2.36388	0.018
Eno3	ENO3	6.27908	434	383	257	0	263.3	278	296.6	2.97262	2.50376	0	2.26825	2.24651	1.58769	-0.045
Enoph1	ENOPH1	12.1482	257	20	0	0	20	0	30	0.262137	0	0	0.290956	0	0.27119	-0.189
Ensa	ENSA	23.6065	119	0	0	0	3.3	0	0	0	0	0	0.10371	0	0	0.8455
Entpd2	ENTPD2	1.68632	495	0	0	40	50	40	60	0	0	0.351965	0.377654	0.283406	0.281599	-0.585
Entpd5	ENTPD5	2.24486	439.5	0	0	0	0	5	0	0	0	0	0	0.0399316	0	-0.91
Entpd6	ENTPD6	3.18892	455	10	0	0	0	0	0	0.074032	0	0	0	0	0	1.616
Ep400	EP400	4.44886	3017	0	5	0	0	5	25	0	0.00704924	0	0	0.00581252	0.0192515	-1.9645
Epb4.1	EPB41	23.9613	831	186.5	168	193	305	290	454.1	0.756446	0.855688	1.01265	1.37369	1.22384	1.27085	-0.362
Epb4.1l1	EPB41L1	0.876914	872.5	23	0	42	23.3	37	51.6	0.0888009	0	0.209678	0.0998492	0.148735	0.137402	-0.4885
Epb4.1l2	EPB41L2	7.05111	988	952	1026	922	1120	897	1642.5	3.24572	4.39075	4.06461	4.23829	3.18412	3.86219	-0.041
Epb4.1l3	EPB41L3	32.7609	929	37	131	195	273.3	217	670.7	0.134158	0.596217	0.914248	1.0999	0.819215	1.67725	-0.833
Epb4.1l5	EPB41L5	17.1731	731	0	0	30	0	0	0	0	0	0.178751	0	0	0	2.532
Epdr1	EPDR1	2.45558	224	0	0	0	20	0	0	0	0	0	0.33382	0	0	2.172
Epha4	EPHA4	7.06264	986	10	75	65	22.5	30	15	0.0341628	0.321613	0.287132	0.085317	0.106708	0.0353427	0.853
Epha5	EPHA5	6.62991	876	0	0	75	20	55	15	0	0	0.372909	0.0853603	0.220198	0.0397807	-0.171
Epha6	EPHA6	1.34773	1130	0	0	50	0	0	0	0	0	0.192724	0	0	0	3.016
Ephb1	EPHB1	1.71234	963.5	0	0	0	7.5	0	0	0	0	0	0.0291163	0	0	1.386
Ephb2	EPHB2	6.8733	986	60	80	70	20	145	110	0.204977	0.343053	0.309219	0.0758373	0.515757	0.25918	-0.602
Ephb3	EPHB3	2.10574	993	0	0	0	12.5	0	0	0	0	0	0.0470642	0	0	1.785
Ephx1	EPHX1	2.10779	455	0	0	0	0	30	40	0	0	0	0	0.23124	0.204237	-3.409
Ephx2	EPHX2	6.99058	554	35	0	0	60	0	30	0.212809	0	0	0.404922	0	0.125805	0.661
Epm2aip1	EPM2AIP1	23.7103	606	0	45	0	0	70	90	0	0.31397	0	0	0.405116	0.345029	-1.704
Epn1	EPN1	28.3764	575	0	0	0	0	0	20	0	0	0	0	0	0.0808067	-2.217
Epn2	EPN2	3.14103	606	3.33333	0	10	6.66667	10	6.6	0.0192593	0	0.0713827	0.0427533	0.0547992	0.0253427	-0.343
Eppk1	EPPK1	0.033275	6548	20	0	0	0	0	0	0.0102885	0	0	0	0	0	2.18
Eprs	EPRS	25.7068	1512	90	25	120	240	120	280	0.200503	0.0699096	0.34568	0.593457	0.278345	0.430221	-0.328
Eps15	EPS15	3.95888	897	0	0	0	20	0	0	0	0	0	0.0833619	0	0	2.172
Eps15l1	EPS15L1	9.14328	753	22	7.5	25	45	45	50	0.10271	0.0529399	0.144747	0.233186	0.213769	0.160996	-0.444
Erap1	ERAP1	2.96473	930	0	0	0	30	20	50	0	0	0	0.120606	0.0754225	0.124903	-1.255
Erbb2ip	ERBB2IP	3.02549	1376	10	0	0	8	0	0	0.0244801	0	0	0.0217371	0	0	2.038
Erbb3	ERBB3	0.060381	1339	0	0	0	0	0	10	0	0	0	0	0	0.0173502	-1.544
Erc1	ERC1	5.98611	1120	0	0	0	30	20	50	0	0	0	0.100146	0.0626276	0.103714	-1.254
Erc2	ERC2	8.46791	1002	0	0	20	20	0	30	0	0	0.0869376	0.0746263	0	0.0695567	-0.188
Ercc3	ERCC3	9.26843	783	0	0	0	0	10	0	0	0	0	0	0.0447912	0	-1.547
Ercc4	ERCC4	3.1912	917	0	0	0	0	0	20	0	0	0	0	0	0.0506694	-2.228
Ergic1	ERGIC1	21.1919	290	0	0	70	30	80	90	0	0	1.05134	0.38677	0.967489	0.720991	-1.013
Ergic3	ERGIC3	54.2187	383	0	0	0	0	20	0	0	0	0	0	0.183141	0	-2.264
Erh	ERH	44.4541	104	0	55	50	20	130	170	0	2.23603	2.09402	0.718996	4.38393	3.79753	-1.369
Erlec1	ERLEC1	19.0929	483	50	25	0	0	30	0	0.348701	0.218847	0	0	0.217835	0	0.42
Erlin1	ERLIN1	1.95986	348	130	0	0	0	0	0	1.25833	0	0	0	0	0	3.926
Erlin2	ERLIN2	14.0072	340	135	80	80	80	140	180	1.33747	0.994855	1.02484	0.879713	1.44412	1.22993	-0.341
Ermn	ERMN	0.807151	281	190	190	330	460	0	0	2.2776	2.85888	5.11508	6.12042	0	0	6.116
Ermp1	ERMP1	4.57446	898	0	0	0	0	0	40	0	0	0	0	0	0.103483	-2.902
Ero1l	ERO1L	7.38631	464	0	0	0	0	30	20	0	0	0	0	0.226755	0.100138	-3.097
Erp29	ERP29	17.8431	262	95	100	40	50	100	140	1.22139	1.61379	0.664973	0.713507	1.33861	1.2414	-0.328
Erp44	ERP44	12.9019	406	60	20	40	70	50	60	0.497801	0.208282	0.42912	0.644617	0.431915	0.343329	0.052
Esam	ESAM	4.06546	394	0	0	0	0	10	0	0	0	0	0	0.0890139	0	-1.542
Esco1	ESCO1	7.77099	843	0	0	30	0	0	0	0	0	0.155003	0	0	0	2.561
Esd	ESD	19.0104	282	0	5	0	110	10	60	0	0.0749669	0	1.45839	0.124367	0.494296	0.017
Espn	ESPN	1.30043	564.6	0	4	10	10	0	0	0	0.0317308	0.081718	0.070307	0	0	1.9676
Esrrb	ESRRB	15.8896	446	0	0	0	0	5	5	0	0	0	0	0.0393305	0.0260532	-1.4545
Esyt1	ESYT1	2.13016	1092	0	0	0	0	40	30	0	0	0	0	0.128467	0.063824	-3.424
Esyt2	ESYT2	6.71099	845	0	0	50	0	10	20	0	0	0.257726	0	0.0415047	0.0549868	0.074
Etf1	ETF1	18.8988	437	0	0	0	30	40	40	0	0	0	0.256667	0.32102	0.212649	-1.393
Etfa	ETFA	12.6031	333	170	200	70	50	90	110	1.71963	2.53942	0.915586	0.561378	0.947878	0.767421	0.401
Etfb	ETFB	11.3587	255	190	165	180	60	150	130	2.50983	2.73585	3.07452	0.879713	2.06303	1.18437	0.257
Etfdh	ETFDH	6.30253	616	110	80	120	30	40	70	0.60151	0.549108	0.848488	0.182083	0.227737	0.263999	0.632
Ethe1	ETHE1	1.96547	254	0	0	0	0	20	10	0	0	0	0	0.276153	0.0914643	-2.589
Etl4	KIAA1217	0.380534	1589.6	0	0	0	0	10	2	0	0	0	0	0.0201045	0.00302181	-1.0292
Evl	EVL	4.17973	401	0	0	0	0	20	0	0	0	0	0	0.17492	0	-2.247
Ewsr1	EWSR1	84.0367	655	0	0	0	0	100	130	0	0	0	0	0.535442	0.461092	-4.559
Exoc1	EXOC1	8.80731	901	0	0	0	0	0	10	0	0	0	0	0	0.0257846	-1.561
Exoc2	EXOC2	7.90095	924	0	0	0	10	0	0	0	0	0	0.040463	0	0	1.605
Exoc3	EXOC3	20.4323	755	0	0	0	20	10	0	0	0	0	0.0990405	0.0464523	0	0.26
Exoc4	EXOC4	12.7279	975	0	0	20	20	0	60	0	0	0.0893451	0.0766929	0	0.142966	-0.872
Exoc5	EXOC5	11.3829	708	0	0	90	10	0	0	0	0	0.553674	0.0528076	0	0	3.661
Exoc7	EXOC7	7.2971	675	0	0	0	5	0	20	0	0	0	0.0268205	0	0.0689086	-1.604
Exog	EXOG	1.08271	392	30	12	0	0	0	0	0.25779	0.129433	0	0	0	0	2.847
Exosc1	EXOSC1	6.09789	195	0	0	0	0	10	20	0	0	0	0	0.179854	0.238276	-2.597
Exosc10	EXOSC10	18.3521	887	0	0	0	0	100	0	0	0	0	0	0.395394	0	-3.823
Exosc2	EXOSC2	14.4002	293	0	0	0	0	10	0	0	0	0	0	0.119698	0	-1.561
Exosc4	EXOSC4	8.35373	245	0	0	0	0	10	40	0	0	0	0	0.143149	0.379297	-3.129
Exosc5	EXOSC5	4.97051	235	0	0	0	0	20	10	0	0	0	0	0.298481	0.0988593	-2.579
Exosc6	EXOSC6	2.96089	273	0	0	0	0	20	10	0	0	0	0	0.256934	0.0850987	-2.608
Exosc8	EXOSC8	4.38242	278	0	0	0	0	10	10	0	0	0	0	0.127071	0.0835724	-2.067
Exosc9	EXOSC9	7.50394	438	0	0	0	0	10	20	0	0	0	0	0.0800719	0.106082	-2.612
Extl2	EXTL2	3.67967	323	77	0	20	0	0	0	0.803384	0	0.269822	0	0	0	3.652
Ezh1	EZH1	9.60317	750	0	0	0	0	10	0	0	0	0	0	0.046762	0	-1.553
Ezr	EZR	5.86463	586	900	854	1406	1691	107	143.1	5.1734	6.16182	10.4504	10.7889	0.640384	0.567319	2.467
F3	F3	1.60644	294	0	25	40	100	0	0	0	0.359535	0.592595	1.27169	0	0	4.183
F8a	F8A1	2.91287	381	0	0	0	0	0	10	0	0	0	0	0	0.0609762	-1.557
Fabp12	FABP12	26.2096	132	0	40	10	20	0	0	0	1.28125	0.329968	0.566482	0	0	3.31
Fabp3	FABP3	31.8567	133	0	25	0	30	30	50	0	0.794762	0	0.843334	0.791086	0.873381	-0.835
Fabp5	FABP5	33.9819	135	80	125	30	50	0	90	1.99612	3.91494	0.967905	1.38473	0	1.5488	0.643
Fabp7	FABP7	21.1276	132	80	125	70	160	20	60	2.04149	4.00391	2.30977	4.53185	0.531386	1.056	1.199
Fads2	FADS2	36.5106	444	0	0	0	0	10	0	0	0	0	0	0.0789898	0	-1.551
Faf1	FAF1	9.81012	649	0	25	0	0	20	10	0	0.162871	0	0	0.108079	0.0357965	-0.563
Faf2	FAF2	11.4282	445	30	20	20	0	50	80	0.227087	0.190028	0.195756	0	0.394062	0.417653	-1.104
Fah	FAH	3.1799	419	0	0	0	30	0	0	0	0	0	0.267693	0	0	2.535
Fahd1	FAHD1	4.85008	227	0	0	0	0	0	20	0	0	0	0	0	0.204687	-2.212
Fahd2a	FAHD2A	5.50568	313	50	45	40	0	20	20	0.538092	0.607879	0.556623	0	0.224099	0.148447	0.732
Faim	FAIM	8.94611	190	45	90	70	110	0	0	0.800475	2.00954	1.61008	2.17184	0	0	4.794
Fam107b	FAM107B	25.3967	131	0	0	0	20	0	0	0	0	0	0.570806	0	0	2.194
Fam114a2	FAM114A2	10.1842	493.5	20	0	0	15	0	20	0.13652	0	0	0.113646	0	0.0941564	0.084
Fam120a	FAM120A	34.9797	1112	0	235	150	190	70	190	0	0.893535	0.587532	0.63882	0.220774	0.396949	0.297
Fam120c	FAM120C	7.81928	1091	50	140	90	260	110	200	0.154375	0.542565	0.359305	0.891001	0.353608	0.425883	0.057
Fam123a	AMER2	17.4368	572	0	0	0	0	0	40	0	0	0	0	0	0.164456	-2.9245
Fam125b	MVB12B	13.2162	317	0	0	0	20	0	0	0	0	0	0.235885	0	0	2.174
Fam129a	FAM129A	3.3127	926	20	0	0	170	40	260	0.0727528	0	0	0.686385	0.151497	0.652301	-0.943
Fam129b	FAM129B	5.04751	749	0	0	0	0	0	50	0	0	0	0	0	0.155086	-3.149
Fam134a	FAM134A	27.6228	541	0	0	0	0	10	30	0	0	0	0	0.0648271	0.128828	-2.84
Fam136a	FAM136A	9.17709	138	0	82	15	5	0	5	0	2.51237	0.473432	0.135463	0	0.0841737	2.417
Fam161a	FAM161A	61.3521	475	50	0	20	0	0	0	0.354574	0	0.183392	0	0	0	3.32
Fam162a	FAM162A	29.3232	155	0	65	0	0	0	0	0	1.77309	0	0	0	0	3.258
Fam164a	ZC2HC1A	11.4137	324	0	0	0	10	0	20	0	0	0	0.115394	0	0.143407	-0.99
Fam168a	FAM168A	30.5218	235	0	40	30	0	0	0	0	0.719682	0.55603	0	0	0	3.333
Fam169a	FAM169A	18.7613	665	0	0	0	0	150	330	0	0	0	0	0.791086	1.15286	-5.34
Fam192a	FAM192A	22.0374	254	0	0	0	0	0	10	0	0	0	0	0	0.0914643	-1.565
Fam193a	FAM193A	18.0372	1518	0	0	0	20	0	0	0	0	0	0.0492593	0	0	2.198
Fam20b	FAM20B	9.73334	409	15	0	0	0	0	20	0.123537	0	0	0	0	0.113604	-0.647
Fam36a	COX20	80.2505	117	15	0	0	0	0	0	0.431853	0	0	0	0	0	1.92
Fam3a	FAM3A	8.71251	230	85	40	20	10	10	10	1.24486	0.735328	0.378745	0.162556	0.152485	0.101008	1.568
Fam3c	FAM3C	30.2371	227	345	140	120	30	30	0	5.11946	2.60766	2.3025	0.494112	0.4635	0	2.532
Fam40a	STRIP1	14.8062	837	0	4	0	0	20	40	0	0.0202061	0	0	0.0838028	0.111025	-2.692
Fam40b	STRIP2	4.86915	830	0	9	0	0	0	0	0	0.0458603	0	0	0	0	1.5285
Fam49b	FAM49B	17.5041	324	0	0	0	20	40	100	0	0	0	0.230789	0.432981	0.717035	-2.316
Fam57b	FAM57B	65.4203	258.333	9.33333	13.3333	13.3333	3.3	6	6.66667	0.119767	0.205	0.211179	0.0481887	0.0821877	0.0563198	0.401333
Fam63a	FAM63A	3.88796	463.5	25	7	10	10	0	0	0.181703	0.0638613	0.0939802	0.0806717	0	0	2.989
Fam63b	FAM63B	8.4229	601	0	5	0	0	0	20	0	0.0351758	0	0	0	0.0773109	-1.491
Fam71b	FAM71B	0.028273	665	20	0	0	0	0	0	0.101307	0	0	0	0	0	2.155
Fam82a2	RMDN3	13.3402	470	70	0	0	0	0	0	0.501685	0	0	0	0	0	3.361
Fam82b	RMDN1	5.10375	305	0	85	0	0	50	40	0	1.17833	0	0	0.574942	0.304681	-0.52
Fam96a	FAM96A	16.8932	160	0	0	0	10	0	0	0	0	0	0.233674	0	0	1.603
Fam98a	FAM98A	13.1079	515	0	0	0	0	10	0	0	0	0	0	0.0681	0	-1.55
Fam98b	FAM98B	19.6126	429	0	0	0	0	0	50	0	0	0	0	0	0.270768	-3.188
Fap	FAP	0.973284	761	0	265	190	550	0	0	0	1.47235	1.08746	2.70214	0	0	5.938
Far1	FAR1	0.391038	515	0	0	0	0	0	20	0	0	0	0	0	0.0902211	-2.238
Farp1	FARP1	4.38849	1048	0	0	70	40	180	150	0	0	0.290926	0.142701	0.602373	0.332518	-1.58
Farp2	FARP2	5.43598	1065	0	0	0	0	40	50	0	0	0	0	0.131724	0.10907	-3.727
Farsa	FARSA	13.237	508	0	5	0	0	30	70	0	0.0416155	0	0	0.207115	0.320125	-3.049
Farsb	FARSB	18.5256	589	70	65	0	50	170	220	0.400326	0.466602	0	0.317384	1.01225	0.867746	-1.241
Fasn	FASN	13.2668	2504	225	340	200	460	300	930	0.302677	0.574108	0.347889	0.686836	0.420185	0.862847	-0.503
Fat1	FAT1	2.81299	4590	140	0	0	0	0	0	0.102742	0	0	0	0	0	3.997
Fat3	FAT3	5.25234	4551	0	0	0	0	10	0	0	0	0	0	0.00770632	0	-1.554
Fat4	FAT4	2.67853	4981	0	0	0	0	10	0	0	0	0	0	0.00704105	0	-1.548
Fau	FAU	17.3832	133	65	50	50	60	0	0	1.64624	1.58952	1.63743	1.68667	0	0	4.462
Fbll1	FBLL1	5.62054	314	0	0	0	5	65	40	0	0	0	0.0595347	0.726002	0.295948	-3.118
Fbn1	FBN1	3.04638	2873	0	0	0	0	10	0	0	0	0	0	0.0122073	0	-1.545
Fbxl17	FBXL17	2.99415	701	10	0	0	0	0	0	0.0480521	0	0	0	0	0	1.602
Fbxl20	FBXL20	9.01099	436	35	0	30	0	10	0	0.270404	0	0.299695	0	0.0804392	0	1.34
Fbxo2	FBXO2	7.38266	297	20	0	0	0	20	0	0.226832	0	0	0	0.236172	0	-0.399
Fbxo22	FBXO22	9.96251	402	0	0	0	0	0	10	0	0	0	0	0	0.0577909	-1.572
Fbxo41	FBXO41	3.02052	873	10	0	0	0	0	0	0.0385848	0	0	0	0	0	1.588
Fbxo6	FBXO6	0.565434	295	0	0	0	20	10	0	0	0	0	0.253477	0.118886	0	0.269
Fbxw11	FBXW11	15.0145	563	0	0	6	0	0	0	0	0	0.0464182	0	0	0	1.223
Fcgbp	FCGBP	0.178171	2583	0	57	30	0	15	0	0	0.0933038	0.0505874	0	0.0203667	0	1.24
Fdps	FDPS	10.8849	386.5	0	0	0	10	0	20	0	0	0	0.0974665	0	0.121127	-0.9835
Fdx1	FDX1	5.88183	188	0	20	20	0	0	10	0	0.449801	0.463359	0	0	0.123574	0.877
Fdx1l	FDX1L	7.65582	174	0	10	0	0	0	0	0	0.242996	0	0	0	0	1.615
Fdxr	FDXR	1.77537	494	90	45	0	0	20	10	0.613686	0.385154	0	0	0.14199	0.0470282	1.033
Fech	FECH	7.96878	422	25	30	0	0	40	30	0.199553	0.300578	0	0	0.332431	0.165156	-0.704
Fen1	FEN1	3.84755	380	0	0	0	0	40	0	0	0	0	0	0.369173	0	-2.892
Fermt2	FERMT2	12.0068	680	0	5	0	20	20	20	0	0.0310892	0	0.109964	0.103151	0.0683292	-0.896
Fga	FGA	0	673	0	0	0	0	135	0	0	0	0	0	0.720426	0	-4.103
Fgb	FGB	0	481	0	0	0	0	100	0	0	0	0	0	0.729137	0	-3.751
Fgfr1	FGFR1	1.69604	820	0	0	0	20	0	0	0	0	0	0.0911897	0	0	2.2
Fgfr1op	FGFR1OP	2.93402	389	55	20	10	0	0	0	0.476575	0.217528	0.112042	0	0	0	3.5065
Fgfr1op2	FGFR1OP2	17.1985	253	0	0	0	0	10	0	0	0	0	0	0.138622	0	-1.545
Fgfr2	FGFR2	0.780883	840	90	0	0	0	0	0	0.360906	0	0	0	0	0	3.598
Fgg	FGG	0.022586	436	0	0	30	0	130	50	0	0	0.299695	0	1.04571	0.266421	-2.203
Fh1	FH	18.8904	507	185	230	130	50	120	100	1.22912	1.91809	1.11681	0.368716	0.830094	0.458224	0.497
Fhad1	FHAD1	0.317361	1420	20	0	0	0	0	0	0.047443	0	0	0	0	0	2.185
Fhl1	FHL1	8.7117	299.667	1.66667	7	9	3.3	12.3333	10	0.0173811	0.0991081	0.131265	0.0413149	0.14189	0.0807287	-0.541333
Fhod1	FHOD1	1.46916	1197	85	0	0	0	0	0	0.239197	0	0	0	0	0	3.55
Fignl1	FIGNL1	0.211693	683	0	0	10	0	0	0	0	0	0.0637712	0	0	0	1.589
Filip1	FILIP1	3.02467	1214	0	0	0	10	0	0	0	0	0	0.0307972	0	0	1.602
Fip1l1	FIP1L1	7.86974	554	0	0	3	0	16	23.1	0	0	0.0236146	0	0.101412	0.0969866	-2.409
Fis1	FIS1	24.3827	148.5	20	17	20	5	5	10	0.453916	0.484298	0.586935	0.125955	0.118151	0.156531	0.943
Fkbp10	FKBP10	1.30607	580.5	0	0	0	0	20	15	0	0	0	0	0.120832	0.0600309	-2.735
Fkbp1a	FKBP1A	60.3345	108	55	75	70	90	60	70	1.71542	2.9362	2.82306	3.11565	1.94842	1.50577	0.303
Fkbp2	FKBP2	7.52337	140	0	30	10	20	20	0	0	0.906029	0.311112	0.534111	0.501021	0	0.584
Fkbp3	FKBP3	74.7854	224	0	35	0	50	50	90	0	0.660646	0	0.834549	0.782845	0.933426	-0.977
Fkbp4	FKBP4	55.2786	458	110	80	20	200	30	190	0.809018	0.738539	0.1902	1.63265	0.229726	0.96377	0.121
Fkbp5	FKBP5	4.70983	456	0	0	0	0	10	0	0	0	0	0	0.0769111	0	-1.548
Fkbp8	FKBP8	22.6099	402.5	42.5	0	35	15	45	45	0.355234	0	0.378746	0.139334	0.392104	0.259736	-0.57
Fkrp	FKRP	7.03225	494	0	5	30	0	0	0	0	0.0427949	0.264508	0	0	0	2.657
Flad1	FLAD1	6.23163	492	0	5	0	0	0	0	0	0.0429688	0	0	0	0	1.103
Flii	FLII	8.26702	1271	0	0	0	0	10	0	0	0	0	0	0.0275936	0	-1.564
Flna	FLNA	8.50436	2639	1082	105	120	80	385	760	1.38108	0.168228	0.198056	0.113339	0.511653	0.669052	-0.309
Flnb	FLNB	3.57818	2591	0	0	0	0	105	160	0	0	0	0	0.142127	0.143462	-4.857
Flnc	FLNC	0.087103	2726	195	0	0	0	0	0	0.240957	0	0	0	0	0	4.32
Flot1	FLOT1	17.1439	428	120	0	80	80	50	30	0.944427	0	0.814126	0.698837	0.409714	0.162841	0.761
Flot2	FLOT2	5.54519	403.5	0	22	20	35	5	15	0	0.231383	0.216688	0.325506	0.0436199	0.0866836	0.881
Flrt3	FLRT3	4.41859	649	0	0	0	0	0	20	0	0	0	0	0	0.071593	-2.227
Flywch1	FLYWCH1	14.7656	673	0	0	0	0	10	0	0	0	0	0	0.0521121	0	-1.551
Fmn2	FMN2	5.64659	1578	0	0	0	10	0	0	0	0	0	0.0236931	0	0	1.592
Fmnl2	FMNL2	5.54508	1083	0	0	0	10	0	0	0	0	0	0.0345224	0	0	1.587
Fmr1	FMR1	19.4273	614	0	77	150	126.6	16	41	0	0.530238	1.06406	0.770895	0.0913915	0.155132	1.336
Fn1	FN1	6.9549	2477	0	0	0	0	70	60	0	0	0	0	0.099112	0.0562744	-4.034
Fnbp4	FNBP4	22.1634	1077	0	0	0	0	10	0	0	0	0	0	0.032564	0	-1.544
Fntb	FNTB	8.54445	437	0	0	0	5	0	0	0	0	0	0.0427778	0	0	1.071
Folh1	FOLH1	0.792787	735.5	0	0	0	65	10	30	0	0	0	0.330582	0.0477079	0.0948075	0.0345
Folr1	FOLR1	0.020433	255	0	0	10	0	0	0	0	0	0.170807	0	0	0	1.595
Fopnl	FOPNL	15.4837	174	0	35	20	0	0	0	0	0.850487	0.50064	0	0	0	3.094
Foxk1	FOXK1	7.09273	719	0	0	0	0	0	25	0	0	0	0	0	0.0807786	-2.454
Foxk2	FOXK2	9.33784	651	0	0	0	0	0	15	0	0	0	0	0	0.0535298	-1.966
Fpgt	FPGT	5.41676	590	0	0	0	10	0	0	0	0	0	0.0633691	0	0	1.587
Frem2	FREM2	0.619655	3160	0	0	0	0	60	0	0	0	0	0	0.0665914	0	-3.278
Frg1	FRG1	21.126	258	0	0	0	0	20	10	0	0	0	0	0.271872	0.0900463	-2.577
Frmd4a	FRMD4A	2.60294	878.5	0	5	0	0	0	10	0	0.0286848	0	0	0	0.0227764	-0.3285
Frmd8	FRMD8	1.02552	466	0	5	0	0	0	0	0	0.0453662	0	0	0	0	1.099
Fry	FRY	6.74409	3020	0	0	0	0	20	0	0	0	0	0	0.0232261	0	-2.222
Fryl	FRYL	33.1795	3007	0	145	0	0	0	80	0	0.203884	0	0	0	0.0618076	0.111
Fsbp	FSBP	4.67225	299	0	0	0	0	0	10	0	0	0	0	0	0.0776988	-1.574
Fscn1	FSCN1	35.5717	493	0	105	210	170	130	200	0	0.900515	1.85531	1.28923	0.924806	0.942472	-0.114
Fsd1l	FSD1L	11.367	497	15	10	0	0	0	0	0.101664	0.0850731	0	0	0	0	2.363
Fsip2	FSIP2	0.000845	6976	0	0	0	0	0	10	0	0	0	0	0	0.00333027	-1.552
Fth1	FTH1	508.634	182	15	55	40	0	20	0	0.27762	1.27773	0.957268	0	0.385401	0	1.182
Ftl1	FTL	152.858	183	10	0	5	5	10	20	0.184069	0	0.119005	0.102152	0.191647	0.253901	-0.858
Ftsj3	FTSJ3	7.76555	838	0	0	10	0	0	0	0	0	0.0519758	0	0	0	1.598
Fubp1	FUBP1	23.2275	642	0	0	0	0	285	435	0	0	0	0	1.55691	1.57413	-5.717
Fubp3	FUBP3	6.89253	575	0	0	0	0	115	110	0	0	0	0	0.70143	0.444437	-4.708
Fundc1	FUNDC1	13.1137	155	0	0	0	0	0	10	0	0	0	0	0	0.149883	-1.559
Fundc2	FUNDC2	9.87305	151	0	15	20	0	10	0	0	0.420013	0.576897	0	0.232261	0	0.747
Fus	FUS	87.1771	518	5	2	0	0	70	215	0.032514	0.0163248	0	0	0.473939	0.96426	-3.983
Fut8	FUT8	1.99791	575	0	0	0	0	0	10	0	0	0	0	0	0.0404034	-1.532
Fxc1	FXC1	7.91693	100	0	55	30	0	0	0	0	2.32547	1.30667	0	0	0	3.483
Fxn	FXN	9.48353	207	45	75	20	0	10	10	0.732273	1.53193	0.420828	0	0.169427	0.112232	1.476
Fxr1	FXR1	9.44904	612.333	18	22	26.6667	50.5333	29	41.5	0.105063	0.153255	0.171564	0.279074	0.167569	0.158846	-0.285333
Fxr2	FXR2	21.7175	674	175	108	160	181.6	16	93.5	0.874599	0.677505	1.03396	1.00736	0.0832557	0.322283	1.244
Fxyd1	FXYD1	8.42607	93.5	0	10	10	0	15	0	0	0.452323	0.465956	0	0.562789	0	-0.166
Fyco1	FYCO1	0.595301	1438	0	0	80	20	30	80	0	0	0.242313	0.0519997	0.0731672	0.129246	-0.572
Fyn	FYN	6.50405	535.5	0	21	30	0	47.5	29.9	0	0.16581	0.243328	0	0.310865	0.129718	-1.043
Fyttd1	FYTTD1	7.59539	300	0	0	5	0	0	0	0	0	0.0728267	0	0	0	1.0895
Fzd2	FZD2	0.711102	570	0	0	0	5	0	0	0	0	0	0.0327963	0	0	1.107
Fzd7	FZD7	0.847292	572	0	0	0	5	0	0	0	0	0	0.0326816	0	0	1.095
G3bp1	G3BP1	15.1806	465	95	82	105	145	39	210	0.688179	0.745606	0.983516	1.16586	0.294148	1.04918	0.038
G3bp2	G3BP2	14.6359	465.5	87	88.5	97.5	142.5	29	75	0.619299	0.776327	0.881054	1.10534	0.218765	0.361493	0.47
G6pdx	G6PD	19.4006	515	0	45	0	110	60	130	0	0.369449	0	0.798574	0.4086	0.586437	-0.691
Gaa	GAA	6.88215	953	0	0	0	60	0	50	0	0	0	0.23539	0	0.121888	-0.281
Gabarapl2	GABARAPL2	51.8077	117	0	10	0	0	0	0	0	0.361379	0	0	0	0	1.596
Gabbr1	GABBR1	34.519	960	0	0	0	0	60	30	0	0	0	0	0.219197	0.0725998	-3.688
Gabbr2	GABBR2	13.3037	940	0	0	0	0	0	60	0	0	0	0	0	0.148289	-3.288
Gabpa	GABPA	10.826	454	0	0	0	0	20	30	0	0	0	0	0.1545	0.153515	-3.097
Gabra1	GABRA1	18.1331	455	0	0	20	0	40	0	0	0	0.191454	0	0.308321	0	-1.082
Gabra3	GABRA3	8.94089	492	0	0	0	0	0	30	0	0	0	0	0	0.141658	-2.629
Gabrb3	GABRB3	19.0262	473	0	0	0	0	5	0	0	0	0	0	0.0370734	0	-0.91
Gad1	GAD1	32.9524	593	0	0	40	0	60	40	0	0	0.293799	0	0.354855	0.156708	-1.348
Gak	GAK	11.6414	1305	0	0	0	0	0	92.5	0	0	0	0	0	0.164671	-3.688
Gale	GALE	2.8752	347	0	0	0	0	0	40	0	0	0	0	0	0.267803	-2.883
Galk1	GALK1	4.15078	392	0	0	0	0	0	50	0	0	0	0	0	0.296326	-3.149
Galns	GALNS	1.52346	520	0	0	0	0	0	10	0	0	0	0	0	0.0446768	-1.554
Galnt1	GALNT1	16.0819	559	0	0	75	0	0	0	0	0	0.584379	0	0	0	3.397
Galnt13	GALNT13	7.79862	556	0	0	85	0	0	30	0	0	0.66587	0	0	0.125352	0.556
Galnt2	GALNT2	8.57667	570	110	0	50	0	0	0	0.650053	0	0.382068	0	0	0	4.119
Galnt7	GALNT7	6.78638	657	0	0	30	0	0	0	0	0	0.198885	0	0	0	2.536
Galt	GALT	6.20453	360	0	0	0	10	0	0	0	0	0	0.103855	0	0	1.572
Ganab	GANAB	32.1535	966	340	245	200	510	530	990	1.18558	1.07235	0.901775	1.97389	1.92421	2.38091	-0.66
Ganc	GANC	3.44068	913	0	0	0	0	0	10	0	0	0	0	0	0.0254457	-1.561
Gap43	GAP43	40.514	227	80	0	20	0	0	0	1.18712	0	0.383751	0	0	0	3.668
Gapvd1	GAPVD1	11.9131	1437	0	0	0	0	0	40	0	0	0	0	0	0.0646679	-2.877
Gar1	GAR1	6.11129	231	0	10	20	0	30	10	0	0.183036	0.377106	0	0.455474	0.100571	-0.717
Gars	GARS	25.9826	729	75	0	20	120	30	150	0.346549	0	0.119494	0.615437	0.144327	0.478023	-0.317
Gart	GART	6.70974	1010	140	0	0	20	0	30	0.466915	0	0	0.0740352	0	0.0690057	1.167
Gatad2a	GATAD2A	1.69797	629.5	0	0	0	0	65	43.3	0	0	0	0	0.362136	0.1598	-3.885
Gatad2b	GATAD2B	26.9655	594	0	0	0	0	90	43.3	0	0	0	0	0.531386	0.169351	-4.053
Gba	GBA	9.37259	515	0	10	0	0	0	0	0	0.0820997	0	0	0	0	1.602
Gba2	GBA2	13.5458	918	0	0	0	0	30	30	0	0	0	0	0.114613	0.0759214	-3.288
Gbas	GBAS	29.6203	281	215	250	280	20	110	90	2.57729	3.76168	4.34007	0.266105	1.3729	0.744083	0.845
Gbe1	GBE1	11.3092	702	0	20	30	30	60	130	0	0.12046	0.186136	0.159777	0.299756	0.430221	-1.353
Gbf1	GBF1	22.0425	1861	0	0	50	20	0	110	0	0	0.117022	0.0401803	0	0.137319	-0.934
Gca	GCA	4.77991	220	0	0	0	0	0	20	0	0	0	0	0	0.211199	-2.236
Gcc2	GCC2	14.1998	1680	0	0	10	0	0	0	0	0	0.025926	0	0	0	1.599
Gcfc1	PAXBP1	17.0684	919	0	0	0	0	0	20	0	0	0	0	0	0.0505592	-2.217
Gclc	GCLC	8.2961	637	0	0	0	30	0	20	0	0	0	0.176081	0	0.0729417	-0.034
Gclm	GCLM	7.37953	274	0	0	0	0	10	0	0	0	0	0	0.127998	0	-1.571
Gcn1l1	GCN1L1	8.67717	2671	195	0	110	0	0	160	0.245919	0	0.179376	0	0	0.139165	0.149
Gdap1	GDAP1	18.6737	358	0	0	30	0	30	50	0	0	0.364992	0	0.293895	0.324468	-1.391
Gdap1l1	GDAP1L1	9.16627	367	0	0	0	0	0	20	0	0	0	0	0	0.126605	-2.204
Gdap2	GDAP2	6.54718	498	0	0	0	0	0	10	0	0	0	0	0	0.0466505	-1.542
Gde1	GDE1	43.1742	331	0	0	0	0	0	40	0	0	0	0	0	0.280748	-2.929
Gdi1	GDI1	87.0946	447	345	262	225	530	225	465	2.59981	2.47823	2.1924	4.433	1.76534	2.41674	0.18
Gdi2	GDI2	75.1207	445	330	152	75	540	145	405	2.49796	1.44422	0.734085	4.53695	1.14278	2.11437	0.191
Gdpd1	GDPD1	17.595	314	0	0	0	10	60	0	0	0	0	0.119069	0.670156	0	-2.064
Gdpd2	GDPD2	0.750641	539	0	0	10	20	0	0	0	0	0.0808084	0.13873	0	0	2.518
Gdpd5	GDPD5	17.7333	607	0	0	0	30	40	0	0	0	0	0.184783	0.231114	0	-0.719
Gemin5	GEMIN5	1.45894	1502	0	0	0	3.33333	0	16.5	0	0	0	0.00830286	0	0.0255211	-1.62533
Get4	GET4	8.11478	300.5	0	10	0	10	0	5	0	0.129301	0	0.114336	0	0.0389584	0.311
Gfap	GFAP	1.56719	429	0	0	0	0	140	87	0	0	0	0	1.14453	0.47114	-4.568
Gfer	GFER	4.98252	198	0	25	0	0	0	0	0	0.533855	0	0	0	0	2.379
Gfm1	GFM1	11.203	751	20	45	40	0	20	10	0.0897059	0.25335	0.231988	0	0.0933994	0.0309347	0.776
Gfpt1	GFPT1	21.6555	681	0	10	0	30	0	20	0	0.0620871	0	0.164704	0	0.0682289	0.205
Ggps1	GGPS1	19.1693	300	0	0	0	0	0	20	0	0	0	0	0	0.15488	-2.23
Ggt1	GGT1	0.936805	568	485	230	330	540	0	10	2.87623	1.7121	2.53053	3.55447	0	0.0409013	4.516
Ggt7	GGT7	8.90646	662	0	30	20	0	50	60	0	0.191607	0.131588	0	0.26489	0.210561	-1.254
Ghitm	GHITM	42.9948	346	65	55	40	0	30	20	0.632802	0.672102	0.503534	0	0.304088	0.134289	0.682
Gigyf2	GIGYF2	8.5182	1288	0	12	0	10	0	0	0	0.0393928	0	0.0289603	0	0	2.1575
Gipc1	GIPC1	9.16545	333	0	0	0	30	0	10	0	0	0	0.336827	0	0.0697656	0.636
Git1	GIT1	6.20848	770	0	20	110	0	40	20	0	0.109822	0.622224	0	0.182189	0.0603427	0.295
Gja1	GJA1	14.072	382	0	0	0	0	0	50	0	0	0	0	0	0.304083	-3.142
Gja8	GJA8	5.31215	440	0	0	0	0	0	40	0	0	0	0	0	0.211199	-2.89
Glb1	GLB1	4.84096	647	0	0	0	20	20	30	0	0	0	0.115573	0.108413	0.107721	-1.284
Glb1l2	GLB1L2	15.6804	652	115	0	50	50	0	0	0.594129	0	0.334016	0.286716	0	0	4.431
Gldc	GLDC	10.6245	1025	60	55	30	0	40	40	0.197178	0.226875	0.12748	0	0.136864	0.0906612	0.105
Glg1	GLG1	25.8642	1175	785	305	540	230	100	190	2.25041	1.09752	2.00171	0.731846	0.298481	0.375665	1.359
Glipr2	GLIPR2	0.558949	154	0	35	50	0	0	0	0	0.960939	1.41415	0	0	0	3.518
Glmn	GLMN	9.20339	564	7.5	0	0	5	0	10	0.0423883	0	0	0.0332522	0	0.0413244	-0.3015
Glo1	GLO1	81.4157	184	285	275	230	300	120	160	5.21744	6.31922	5.44446	6.09584	2.28727	2.02017	0.862
Glod4	GLOD4	14.6318	298	150	120	90	120	60	100	1.69553	1.7026	1.31544	1.50555	0.706137	0.779595	0.602
Glrx3	GLRX3	5.27239	337	10	0	0	0	0	30	0.0999542	0	0	0	0	0.206812	-1.381
Glrx5	GLRX5	14.346	152	125	50	50	0	10	30	2.77011	1.39083	1.43275	0	0.230733	0.458525	1.239
Gls	GLS	18.3429	638.5	82.5	87.5	55	15	30	95	0.412311	0.548905	0.370643	0.0832072	0.163763	0.327453	0.091
Glt25d1	GLT25D1	11.144	617	0	10	0	0	70	50	0	0.0685273	0	0	0.397894	0.188265	-2.761
Glt8d1	GLT8D1	2.94037	371	20	0	0	0	0	0	0.181588	0	0	0	0	0	2.199
Glud1	GLUD1	16.4079	558	320	290	230	170	250	540	1.93173	2.19742	1.79531	1.13905	1.5713	2.24825	-0.253
Glul	GLUL	374.56	373	260	165	220	340	610	710	2.34798	1.87035	2.56897	3.408	5.73555	4.42216	-0.794
Glyr1	GLYR1	15.314	549	0	0	0	0	65	105	0	0	0	0	0.415248	0.44434	-4.3015
Gm10015	N/A	3.18251	154	0	1	4	19.8	1	5	0	0.0274554	0.113132	0.4807	0.0227737	0.0754284	1.0285
Gm10020	N/A	49.3933	204	57	68	72	95	26	19.9	0.941186	1.40938	1.53726	1.7411	0.446989	0.226625	1.359
Gm10045	N/A	0	160	19	107	125	60	0	18	0.400004	2.82756	3.40279	1.40204	0	0.261359	2.327
Gm10051	N/A	0	137	50	137	180	45	0	0	1.22936	4.22813	5.72265	1.22807	0	0	5.066
Gm10071	RPL13	48.1573	211	0	0	0	180	30	20	0	0	0	3.18948	0.498647	0.220208	0.806
Gm10094	SAP18	29.2961	172	0	0	0	0	170	70	0	0	0	0	3.46637	0.945486	-4.664
Gm10132	N/A	31.4765	156	21	38	31.5	36.4	3	4.4	0.453446	1.02993	0.87949	0.872382	0.0674451	0.065526	0.966
Gm10145	N/A	14.1937	154	0	1	7	19.8	1	5	0	0.0274554	0.197981	0.4807	0.0227737	0.0754284	1.136
Gm10193	N/A	83.8177	76	5	0	0	0	0	0	0.221609	0	0	0	0	0	1.122
Gm10237	N/A	0	232	0	0	0	0	5	0	0	0	0	0	0.0755851	0	-0.916
Gm10257	N/A	42.4113	136	47	5	0	0	0	0	1.1641	0.155446	0	0	0	0	3.033
Gm10334	N/A	0	246	170	42	5	55.1	3	31.9	2.32779	0.721876	0.0885279	0.837426	0.0427701	0.30126	1.561
Gm10335	N/A	52.0786	156	0	0	0	0	4	0	0	0	0	0	0.0899269	0	-0.727
Gm10349	NUTF2	8.56301	127	0	2	15	5	0	0	0	0.0665848	0.514438	0.147196	0	0	2.168
Gm10362	RPL17-C18orf32	14.7635	267.5	0	0	0	56.3	0	1.4	0	0	0	0.787686	0	0.0121711	2.8995
Gm10705	N/A	7.45703	154	0	1	3.5	19.8	1	5	0	0.0274554	0.0989903	0.4807	0.0227737	0.0754284	1.023
Gm11425	N/A	15.1219	165	202	120	90	95	50	60	4.12381	3.07501	2.37577	2.15263	1.06277	0.844798	1.03
Gm11546	N/A	4.68777	159	50	15	10	0	0	0	1.05926	0.39888	0.273935	0	0	0	3.376
Gm11686	N/A	8.38908	122	0	0	0	0	5	0	0	0	0	0	0.143736	0	-0.915
Gm11694	N/A	70.9138	52	3	11	2	14	0	0	0.194334	0.894413	0.167522	1.00659	0	0	2.463
Gm11703	N/A	7.18572	160	18	0	0	53.3	0	10.5	0.378951	0	0	1.24548	0	0.15246	1.402
Gm11744	PRCD	73.2079	53	45	15	40	0	0	0	2.86001	1.19664	3.28722	0	0	0	3.643
Gm11983	N/A	9.45896	236	12	0	0	0	0	0	0.171277	0	0	0	0	0	1.731
Gm12372	N/A	11.3028	301	0	0	0	0	30	15	0	0	0	0	0.34955	0.115774	-2.949
Gm12508	N/A	2.32081	170	19	0	0	18	0	0	0.376474	0	0	0.395871	0	0	2.7
Gm12657	H3F3C	68.041	136	19	5	10	0	54	49.8	0.470593	0.155446	0.320263	0	1.39254	0.850699	-1.599
Gm12854	N/A	2.28182	96	12	0	0	0	0	0	0.421057	0	0	0	0	0	1.73
Gm13202	CHCHD2	0	153	16	3	5	0	2	0	0.352257	0.0829046	0.142339	0	0.0458451	0	1.765
Gm13540	N/A	0	143	0	25	0	0	10	0	0	0.739184	0	0	0.245255	0	0.465
Gm13653	N/A	27.4763	160	19	29	0	53.3	0	10.5	0.400004	0.766349	0	1.24548	0	0.15246	1.729
Gm13981	N/A	0	148	55	0	0	0	0	0	1.25179	0	0	0	0	0	3.111
Gm14279	N/A	41.9658	110	95	255	190	140	0	0	2.90912	9.80158	7.52326	4.75845	0	0	5.56
Gm14517	N/A	0	114	0	0	15	0	15	0	0	0	0.573102	0	0.461467	0	-0.364
Gm15067	N/A	36.6581	51	1.5	11	2	14	0	0	0.0990722	0.91195	0.170807	1.02633	0	0	2.4165
Gm15210	IMPDH2	4.76966	514	0	0	23	28.3	26	21.6	0	0	0.194899	0.205851	0.177404	0.0976284	-0.385
Gm15453	RBM3	20.0826	154	24	0	0	0	33	0	0.524954	0	0	0	0.751532	0	-0.723
Gm15501	N/A	19.3681	188	204.5	150	155	175	55	40	3.71085	3.04913	3.24574	3.14561	1.03777	0.499955	1.1535
Gm15776	GNG5	9.18645	68	170	100	50	90	0	50	8.42114	6.21784	3.20263	4.94838	0	1.70823	1.593
Gm15800	HECTD4	11.4942	4418	0	0	0	0	0	30	0	0	0	0	0	0.0157754	-2.619
Gm17669	N/A	3.5144	196	25.5	32	42	18	2.5	2.5	0.46617	0.704689	0.952781	0.350511	0.0391423	0.0345713	2.551
Gm17748	N/A	0.384641	199	9	1	0	3.3	9	9.9	0.152342	0.0212469	0	0.0619999	0.158615	0.115576	-0.78
Gm1862	ATF1	0	269	0	0	0	0	12	0	0	0	0	0	0.156453	0	-1.716
Gm2001	N/A	0.169392	73	0	0	0	0	0	3.3	0	0	0	0	0	0.105021	-0.544
Gm20056	N/A	0.635856	178.5	5	2.5	5	5	5	3.3	0.0951541	0.0597194	0.123039	0.105615	0.099072	0.0429528	-0.0255
Gm20091	N/A	0.244799	63	0	10	0	0	10	0	0	0.671132	0	0	0.55669	0	-0.316
Gm20899	GAPDH	257.622	333	2175	1277	530	3220	495	2700	22.0012	16.2142	6.93229	36.1528	5.21333	18.8367	0.313
Gm2223	N/A	6.74453	471.5	25	3	0	0	0	0	0.177287	0.0269037	0	0	0	0	1.9305
Gm2423	N/A	43.2314	319	58	0	0	0	0	0	0.612446	0	0	0	0	0	3.179
Gm2483	N/A	0	435	0	0	20	0	0	0	0	0	0.200256	0	0	0	2.214
Gm3244	NDUFB4	9.39648	129	55	75	90	0	50	100	1.43616	2.45822	3.03877	0	1.35936	1.80093	-0.111
Gm3258	N/A	3.12481	117	0	0	0	0	0	10	0	0	0	0	0	0.198564	-1.555
Gm3362	N/A	26.9232	156	42	76	68	77.8	6	4.4	0.906892	2.05986	1.89858	1.8646	0.13489	0.065526	2.772
Gm3776	N/A	0.241016	223	0	0	0	12.5	0	0	0	0	0	0.209573	0	0	1.794
Gm3837	PDCD5	0	126	50	10	10	0	0	30	1.33669	0.335566	0.34568	0	0	0.553141	0.342
Gm3940	N/A	13.2185	143	0	0	0	0	6	4.4	0	0	0	0	0.147153	0.0714829	-1.5
Gm4024	TMED10	0	219	27	65	85	55	55	0	0.415289	1.25493	1.69052	0.938963	0.88079	0	0.927
Gm4581	N/A	81.7769	204	57	68	72	0	26	19.9	0.941186	1.40938	1.53726	0	0.446989	0.226625	0.974
Gm4604	RPL36	0	105	0	0	0	0	107	65	0	0	0	0	3.57395	1.43817	-4.242
Gm4845	N/A	0	196	2	0	0	0	0	0	0.034372	0	0	0	0	0	0.599
Gm4887	N/A	3.28489	350	0	10	0	0	0	0	0	0.120804	0	0	0	0	1.584
Gm4916	N/A	0	537	0	0	0	0	0	51.6	0	0	0	0	0	0.223234	-3.145
Gm4943	N/A	0	143	0	0	0	0	0	5	0	0	0	0	0	0.0812305	-0.926
Gm4947	N/A	3.57639	273	0	0	130	0	0	0	0	0	2.07408	0	0	0	3.947
Gm4955	N/A	0.01191	890	0	0	0	0	5	0	0	0	0	0	0.0197031	0	-0.922
Gm4963	N/A	33.335	125	82	0	0	19.8	15	2.5	2.20971	0	0	0.592223	0.420858	0.0464639	1.311
Gm4972	N/A	5.48898	381	0	0	0	5	0	0	0	0	0	0.0490653	0	0	1.082
Gm4988	N/A	0.534927	411	5	0	0	0	0	0	0.0409788	0	0	0	0	0	1.081
Gm5093	N/A	0	198	0	0	0	0	0	70	0	0	0	0	0	0.821331	-3.442
Gm5215	N/A	0	134.5	0	19	0	19.9	0	6.6	0	0.596122	0	0.55318	0	0.114002	1.208
Gm5331	N/A	1.39385	211	0	0	0	2.5	2	0	0	0	0	0.0442983	0.0332431	0	0.214
Gm5414	N/A	0	552	0	0	0	112.5	0	115.8	0	0	0	0.761979	0	0.487366	-0.508
Gm5428	RPL6	36.1859	309	0	0	0	0	35	80	0	0	0	0	0.414697	0.62789	-3.947
Gm5451	N/A	15.1972	192	55	30	40	0	20	55	0.964922	0.660646	0.907411	0	0.365328	0.665498	0.023
Gm5453	N/A	39.054	148	0	0	0	36.6	0	3.3	0	0	0	0.92459	0	0.0518009	1.822
Gm5528	N/A	0	160	134	29	0	0	0	10.5	2.82108	0.766349	0	0	0	0.15246	2.205
Gm5566	NME1-NME2	0	181	0	0	50	89.9	0	0	0	0	1.2032	1.857	0	0	4
Gm5614	N/A	3.00837	105	17	0	0	16.25	0	0	0.545369	0	0	0.578621	0	0	2.5945
Gm5616	NHP2L1	6.5626	128	32	32	15	5	40	25	0.842114	1.05703	0.510419	0.146046	1.09598	0.453749	-0.239
Gm5621	N/A	18.0427	214	47	0	0	0	0	0	0.739801	0	0	0	0	0	2.964
Gm5637	N/A	0	372	0	0	0	5	0	10	0	0	0	0.0502524	0	0.0624514	-0.813
Gm5745	N/A	0	104	42	107	65	32.5	0	0	1.36034	4.3501	2.72223	1.16837	0	0	4.545
Gm5771	PRSS1	0	245	172	22	5	55.1	3	31.9	2.36479	0.379669	0.0888892	0.840844	0.0429447	0.302489	1.494
Gm5792	N/A	2.85339	182	0	0	0	0	0	22.5	0	0	0	0	0	0.287208	-2.333
Gm5803	HNRNPA1L2	25.6778	320	0	0	20	0	0	0	0	0	0.272223	0	0	0	2.155
Gm5848	N/A	1.68434	118	8	13	0	3.3	0	0	0.22837	0.465811	0	0.104559	0	0	2.275
Gm5858	N/A	0	154	0	1	0	0	1	0	0	0.0274554	0	0	0.0227737	0	0.371
Gm5908	N/A	0	148	40	30	70	36.6	0	3.3	0.910393	0.857054	2.06007	0.92459	0	0.0518009	3.329
Gm5955	N/A	0	73	0	0	0	0	0	3.3	0	0	0	0	0	0.105021	-0.57
Gm6115	N/A	9.41281	214	0	0	0	0	3	0	0	0	0	0	0.0491667	0	-0.476
Gm6139	N/A	18.1348	293	61	136	105	87.5	37	35	0.701282	1.96255	1.56087	1.11653	0.442882	0.277515	1.192
Gm6155	N/A	2.66236	154	0	0	0	5	0	0	0	0	0	0.121394	0	0	1.099
Gm6265	N/A	155.715	76	15	0	0	0	0	0	0.664827	0	0	0	0	0	1.929
Gm6415	NDUFS6	2.50202	116	11	0	0	0	0	0	0.319422	0	0	0	0	0	1.6715
Gm6436	N/A	27.0009	186	20	0	0	0	0	0	0.362199	0	0	0	0	0	2.172
Gm6646	N/A	11.3621	132	24	0	0	0	0	0	0.612446	0	0	0	0	0	2.324
Gm6713	N/A	0.003903	491	0	0	10	0	0	0	0	0	0.0887082	0	0	0	1.599
Gm6834	N/A	0	151	0	182	0	0	45	0	0	5.09616	0	0	1.04518	0	0.902
Gm6851	N/A	11.5469	131	0	2	0	0	0	5	0	0.0645517	0	0	0	0.0886715	-0.685
Gm6901	N/A	2.85339	182	0	0	0	0	0	22.5	0	0	0	0	0	0.287208	-2.331
Gm6921	N/A	0.037659	146.5	0	4	0	3.2	0	0	0	0.116047	0	0.0816747	0	0	1.20925
Gm6988	N/A	15.2238	125	15	42.5	0	9.9	0	2.5	0.404215	1.43757	0	0.296111	0	0.0464639	1.496
Gm7061	N/A	0.608893	503	44.5	6	0	0	19	19.1	0.364732	0.0347518	0	0	0.0912819	0.0607849	1.065
Gm7250	N/A	2.03528	184	0	0	0	0	0	5	0	0	0	0	0	0.0631303	-0.908
Gm7429	N/A	71.2233	115	95	0	105	0	25	20	2.78264	0	3.97683	0	0.762423	0.404034	1.008
Gm7671	N/A	0	132	24	0	0	0	0	0	0.612446	0	0	0	0	0	2.309
Gm8112	N/A	0	155	0	0	0	0	6	4.4	0	0	0	0	0.135761	0.0659487	-1.505
Gm8210	N/A	57.132	160	17	32	42	18	0	0	0.357898	0.845627	1.14334	0.420613	0	0	3.744
Gm8264	N/A	0	155	0	0	0	0	6	4.4	0	0	0	0	0.135761	0.0659487	-1.505
Gm8290	N/A	5.57064	155	57	96	88	87.8	14	12.8	1.23872	2.61871	2.47284	2.11784	0.316775	0.191851	2.018
Gm8430	N/A	33.1371	155.5	0	21.5	0	222.9	0	156.3	0	0.582723	0	5.35937	0	2.33517	-0.049
Gm8539	N/A	2.90569	179	0	0	5	5	0	5	0	0	0.121664	0.104435	0	0.0648937	0.228
Gm8556	N/A	2.64694	429	0	0	0	0	3	0	0	0	0	0	0.0245276	0	-0.4565
Gm8618	N/A	0	143	0	0	0	0	5	5	0	0	0	0	0.122628	0.0812305	-1.429
Gm8841	N/A	7.363	293	126	32	78	67.4	30	28.3	1.44855	0.461776	1.1595	0.860047	0.359094	0.22439	1.155
Gm8894	N/A	30.3406	176	25	24	43	0	0	0	0.478474	0.576564	1.06415	0	0	0	3.575
Gm9178	MRTO4	2.59577	239	0	0	0	0	20	0	0	0	0	0	0.293485	0	-2.225
Gm9386	N/A	2.22578	176	0	2	5	5	0	0	0	0.048047	0.123738	0.106215	0	0	1.588
Gm9840	RBX1	12.8234	124	0	40	65	10	0	0	0	1.36391	2.28316	0.301514	0	0	3.794
Gm9846	RPS27	399.796	84	145	140	95	60	40	70	5.8146	7.04689	4.92594	2.67056	1.67007	1.93599	0.892
Gm9892	N/A	0.005225	331	0	0	0	0	3	12.5	0	0	0	0	0.0317868	0.0877339	-1.4785
Gmeb2	GMEB2	4.31178	530	0	0	0	0	0	10	0	0	0	0	0	0.0438338	-1.555
Gmfb	GMFB	21.0556	142	0	50	30	20	0	20	0	1.48878	0.920191	0.526589	0	0.32721	1.097
Gmppb	GMPPB	2.01617	360	0	0	0	0	0	10	0	0	0	0	0	0.0645331	-1.537
Gmps	GMPS	8.47817	693	0	0	0	0	0	70	0	0	0	0	0	0.234666	-3.464
Gna11	GNA11	11.4279	359	55	52	50	130	110	60	0.516059	0.612432	0.606626	1.35388	1.07461	0.388277	0.024
Gna12	GNA12	7.06	379	81	0	0	0	0	0	0.719907	0	0	0	0	0	3.502
Gna13	GNA13	4.80321	377	196	185	165	140	110	95	1.75124	2.07481	1.90628	1.38841	1.02331	0.58542	0.709
Gnai1	GNAI1	7.96514	354	270	110	201	256.6	77	100.7	2.56916	1.31383	2.47308	2.71009	0.762854	0.660863	1.056
Gnai2	GNAI2	58.9049	355	360	324	181	326.6	117	220.7	3.4159	3.85892	2.22073	3.43968	1.15588	1.44431	0.764
Gnai3	GNAI3	12.4123	354	295	272	196	301.6	0	135.7	2.80705	3.24874	2.41156	3.18536	0	0.890557	1.557
Gnal	GNAL	3.75333	414.5	72	75	0	135	0	38.2	0.592264	0.770072	0	1.2257	0	0.215511	1.486
Gnao1	GNAO1	42.5421	354	301.5	261	218.5	292.6	222	271.65	2.8689	3.11735	2.6884	3.0903	2.1994	1.78276	0.131
Gnaq	GNAQ	16.2211	359	100	92	80	140	70	100	0.938288	1.08353	0.970601	1.45802	0.683845	0.647129	0.388
Gnas	GNAS	19.6107	756.5	197.25	154.5	127.5	135	62.5	53.2	0.781584	1.10545	0.936616	0.86327	0.373192	0.214618	1.08875
Gnat1	GNAT1	1939.4	350	5118	3779	2353	4677.2	182	428.3	49.2564	45.6518	29.2819	49.9629	1.82372	2.84292	2.763
Gnat2	GNAT2	34.4634	354	708	317	221	337.2	0	50.8	6.73691	3.78621	2.71916	3.56135	0	0.333385	2.931
Gnat3	GNAT3	1.03669	354	0	256	223	482.2	0	0	0	3.05763	2.74376	5.09277	0	0	5.912
Gnaz	GNAZ	30.5528	355	27	75	75	130	80	95	0.256192	0.893268	0.920191	1.36913	0.790343	0.6217	0.064
Gnb1	GNB1	183.077	340	2657	1969	1615	2172.9	260	209.9	26.3235	24.4859	20.689	23.8941	2.68194	1.43423	2.385
Gnb2	GNB2	40.4436	340	1072	691	495	1002.9	190	129.9	10.6205	8.59306	6.3412	11.0283	1.95988	0.887597	1.823
Gnb2l1	GNB2L1	127.277	317	730	455	470	380	230	220	7.75701	6.06877	6.45779	4.48182	2.54462	1.61231	1.01
Gnb3	GNB3	119.562	340	597	416	240	566.4	190	196.6	5.91461	5.17325	3.07452	6.22837	1.95988	1.34335	1.05
Gnb4	GNB4	3.59833	340	911	0	287	476.5	0	53.3	9.02548	0	3.67661	5.23979	0	0.364195	2.938
Gnb5	GNB5	82.9988	374	372	260	205	215	10	5	3.36104	2.78307	2.26049	2.03503	0.0940706	0.031157	3.5145
Gng10	GNG10	8.92127	68	0	15	10	10	10	0	0	0.932676	0.640525	0.54982	0.515757	0	0.721
Gng11	GNG11	3.10656	73	0	98	0	0	0	0	0	5.67612	0	0	0	0	3.659
Gng12	GNG12	0.808506	72	35	20	10	40	0	0	1.63744	1.17448	0.60494	2.0771	0	0	3.699
Gng13	GNG13	67.2814	67	10	50	40	0	60	90	0.502754	3.15532	2.60034	0	3.14073	3.12071	-0.902
Gng2	GNG2	2.64791	71	40	80	60	10	120	60	1.89772	4.76409	3.68076	0.526589	5.92757	1.96326	-0.442
Gng3	GNG3	57.2684	75	0	30	20	0	0	50	0	1.69125	1.16149	0	0	1.5488	-0.472
Gng4	GNG4	8.59305	75	0	0	10	0	0	0	0	0	0.580743	0	0	0	1.602
Gng7	GNG7	7.48308	69	0	0	0	10	30	0	0	0	0	0.541852	1.52485	0	-1.387
Gngt1	GNGT1	627.716	74	485	883	395	1030	60	195	22.077	50.4519	23.2493	52.0398	2.84363	6.12193	1.897
Gngt2	GNGT2	58.5041	69	35	86	35	100	0	25	1.70864	5.26985	2.20935	5.41852	0	0.841737	1.804
Gnl1	GNL1	12.1881	607	0	15	40	40	40	80	0	0.104484	0.287023	0.246378	0.231114	0.306187	-0.724
Gnl3	GNL3	6.75845	538	0	0	50	0	0	0	0	0	0.404793	0	0	0	3.012
Gnpda1	GNPDA1	4.06754	289	70	20	20	20	20	0	0.815889	0.292604	0.301424	0.258739	0.242709	0	1.346
Gnpda2	GNPDA2	8.64725	276	52	0	0	10	20	20	0.634636	0	0	0.135463	0.254141	0.168347	-0.027
Gns	GNS	26.3252	544	25	0	0	20	40	60	0.1548	0	0	0.137455	0.257878	0.256235	-1.252
Golga2	GOLGA2	7.25374	1012.5	177.5	60	275	55	30	5	0.586742	0.250601	1.16743	0.200422	0.103703	0.0114746	1.925
Golga3	GOLGA3	8.85322	1447	135	0	90	10	0	0	0.314265	0	0.270906	0.0258381	0	0	4.514
Golga4	GOLGA4	18.7	2238	0	10	0	0	0	0	0	0.0188925	0	0	0	0	1.574
Golga5	GOLGA5	9.63205	729	355	55	180	0	0	0	1.64033	0.318995	1.07545	0	0	0	5.436
Golga7	GOLGA7	3.58919	137	50	50	20	50	30	10	1.22936	1.54311	0.63585	1.36452	0.767989	0.169576	0.95
Golgb1	GOLGB1	15.5818	3238	1125	520	320	10	110	10	1.17032	0.679008	0.430446	0.0115466	0.119143	0.00717478	2.305
Golim4	GOLIM4	11.7981	655	0	0	80	0	0	0	0	0	0.531978	0	0	0	3.455
Golph3	GOLPH3	16.52	298	0	0	20	0	0	0	0	0	0.29232	0	0	0	2.164
Gorasp1	GORASP1	7.3377	446	90	0	90	0	0	0	0.679733	0	0.878927	0	0	0	4.246
Gorasp2	GORASP2	32.168	451	80	30	0	0	0	0	0.597509	0.281251	0	0	0	0	3.766
Gosr1	GOSR1	9.00493	250	120	25	160	0	0	10	1.61686	0.422813	2.78757	0	0	0.0929277	2.869
Gosr2	GOSR2	16.9675	212	0	0	20	0	0	0	0	0	0.410903	0	0	0	2.187
Got1	GOT1	55.2003	413	410	425	330	750	290	430	3.34399	4.35098	3.48024	6.78955	2.46265	2.41882	0.479
Got2	GOT2	61.5772	430	1120	795	600	590	450	860	8.77365	7.81713	6.07754	5.12995	3.67027	4.64639	0.363
Gp1ba	GP1BA	3.33823	734	0	0	0	0	10	0	0	0	0	0	0.0477813	0	-1.538
Gpaa1	GPAA1	7.86697	621	0	0	0	0	20	10	0	0	0	0	0.112952	0.0374105	-2.6
Gpam	GPAM	12.6473	827	0	0	10	0	0	0	0	0	0.0526671	0	0	0	1.577
Gpc1	GPC1	6.29789	557	0	0	10	0	20	0	0	0	0.078197	0	0.12593	0	-0.976
Gpd1l	GPD1L	7.51954	351	0	0	0	0	30	40	0	0	0	0	0.299756	0.264751	-3.432
Gpd2	GPD2	1.71706	727	0	15	90	0	60	40	0	0.087238	0.539204	0	0.289448	0.127824	-0.43
Gphn	GPHN	10.5453	770.5	10	2.5	70	0	50	140	0.0438031	0.0136921	0.395651	0	0.22759	0.422126	-1.3115
Gpi1	GPI	132.507	558	345	355	350	1040	230	800	2.08265	2.68994	2.73199	6.96833	1.4456	3.33074	0.209
Gpkow	GPKOW	12.1992	488	0	0	0	0	0	10	0	0	0	0	0	0.0476064	-1.57
Gpm6a	GPM6A	39.4719	241.333	33	41.6667	56.6667	50	23.3333	19.9	0.47906	0.633713	0.887826	0.686294	0.294365	0.199243	0.746333
Gpm6b	GPM6B	18.4397	295	34.6667	0	83.3333	26.6	0	16.6667	0.380739	0	1.18345	0.339411	0	0.126246	1.86567
Gpnmb	GPNMB	5.09115	574	0	0	0	0	10	0	0	0	0	0	0.0611001	0	-1.56
Gpr107	GPR107	8.65389	551	15	0	30	0	0	0	0.0917002	0	0.237145	0	0	0	2.919
Gpr108	GPR108	13.0973	569	5	0	0	0	0	0	0.0295998	0	0	0	0	0	1.083
Gpr156	GPR156	1.35137	798	0	45	0	30	10	0	0	0.238429	0	0.140556	0.0439492	0	1.493
Gpr179	GPR179	16.2017	2293	0	0	0	0	0	10	0	0	0	0	0	0.0101317	-1.544
Gpr180	GPR180	11.4156	441	0	0	0	0	0	10	0	0	0	0	0	0.0526801	-1.573
Gpr37	GPR37	35.2083	600	0	20	20	50	20	0	0	0.140938	0.145186	0.311565	0.116905	0	0.986
Gpr98	GPR98	4.32368	6298	125	80	0	0	0	0	0.0668557	0.0537076	0	0	0	0	4.365
Gprasp1	GPRASP1	18.8395	1347	0	0	0	10	0	0	0	0	0	0.0277563	0	0	1.606
Gprin1	GPRIN1	9.03143	932	120	135	210	0	230	180	0.433707	0.612444	0.981406	0	0.865498	0.448685	-0.375
Gps1	GPS1	15.1031	506.5	0	0	35	25	35	65	0	0	0.301424	0.184814	0.24271	0.298582	-0.9795
Gpx1	GPX1	21.8739	201	25	80	80	30	0	50	0.418962	1.68284	1.73356	0.558027	0	0.577909	0.946
Gpx4	GPX4	201.504	225	105	87.5	80	60	20	35	1.60613	1.6642	1.57301	1.01269	0.31665	0.36707	1.3085
Grb2	GRB2	15.654	217	0	0	0	0	30	0	0	0	0	0	0.484859	0	-2.623
Grcc10	C12orf57	92.7668	126	20	25	0	0	10	0	0.534675	0.838915	0	0	0.278345	0	0.985
Grhpr	GRHPR	5.53503	328	82	50	20	20	30	20	0.842114	0.644532	0.265584	0.227974	0.320776	0.141658	0.744
Gria1	GRIA1	3.42229	884	0	1	0	0	8	11.0667	0	0.00478961	0	0	0.0317831	0.0283462	-1.86933
Gria2	GRIA2	10.3759	883	0	0	0	0	0	73.2	0	0	0	0	0	0.192591	-3.546
Gria3	GRIA3	7.57761	888	0	0	0	0	0	33.2	0	0	0	0	0	0.0868581	-2.705
Gria4	GRIA4	9.78389	902	7.5	3	5	0	32.5	39.9	0.0280082	0.0140625	0.024144	0	0.126366	0.102767	-0.378
Grifin	N/A	1.47205	144	0	0	0	0	0	20	0	0	0	0	0	0.322666	-2.229
Grik2	GRIK2	3.45472	888.5	0	0	0	0	0	10	0	0	0	0	0	0.02616	-1.555
Grin1	GRIN1	5.18562	909.667	0	0	0	0	0	13.2	0	0	0	0	0	0.0337307	-1.824
Grip1	GRIP1	5.32614	1034	0	0	0	0	0	20	0	0	0	0	0	0.044936	-2.216
Grk1	GRK1	84.2224	564	1025	450	500	870	20	130	6.12175	3.37351	3.86132	5.76727	0.124367	0.535488	2.447
Grlf1	ARHGAP35	20.1105	1499	0	20	0	10	0	0	0	0.0564127	0	0.0249418	0	0	2.515
Grn	GRN	7.56426	602	5	0	0	0	0	0	0.0279772	0	0	0	0	0	1.095
Grpel1	GRPEL1	5.29617	217	40	50	30	0	0	0	0.620913	0.974224	0.602153	0	0	0	3.842
Grsf1	GRSF1	12.5726	420.5	17.5	15	0	0	0	0	0.140111	0.153802	0	0	0	0	2.586
Grtp1	GRTP1	23.7842	342	5	0	0	0	0	0	0.0492464	0	0	0	0	0	1.11
Gsk3a	GSK3A	20.5914	490	0	0	0	0	20	20	0	0	0	0	0.143149	0.0948242	-2.868
Gsk3b	GSK3B	26.6221	420	0	0	0	0	10	20	0	0	0	0	0.0835035	0.110628	-2.587
Gsn	GSN	0.321465	755.5	0	0	0	15	10	75	0	0	0	0.0743094	0.0464704	0.230871	-2.065
Gspt1	GSPT1	11.9306	635.5	7	12	0	15	5	25	0.0371034	0.0798389	0	0.0882482	0.0275936	0.0913924	-0.3385
Gsr	GSR	7.39916	500	105	45	40	30	20	50	0.707376	0.380532	0.348446	0.224327	0.140286	0.232319	0.646
Gsta1	GSTA1	0.192117	223	0	0	0	12.5	0	0	0	0	0	0.209573	0	0	1.773
Gsta3	GSTA3	0.717502	221	0	7	0	37.5	0	40	0	0.133923	0	0.634408	0	0.420487	-0.375
Gsta4	N/A	13.6019	222	0	62	110	117.5	70	80	0	1.18083	2.15817	1.97886	1.10586	0.837187	0.163
Gstm1	GSTM5	7.29966	218	9	52	55	50	70	97.5	0.139065	1.00855	1.09888	0.857518	1.12615	1.03904	-0.507
Gstm2	GSTM1	1.63681	218	9	0	0	0	0	42.5	0.139065	0	0	0	0	0.452916	-1.811
Gstm4	GSTM4	1.18154	201	4	0	0	0	0	0	0.0675169	0	0	0	0	0	0.948
Gstm5	GSTM3	38.4311	224	9	72	95	90	90	127.5	0.13534	1.35904	1.84723	1.50219	1.40912	1.32235	-0.299
Gstm7	GSTM2	9.68315	218	14	0	0	0	0	42.5	0.216323	0	0	0	0	0.452916	-1.452
Gsto1	GSTO1	6.63139	240	0	0	0	30	40	30	0	0	0	0.467347	0.584525	0.290399	-1.254
Gstp1	GSTP1	44.9607	210	110	165	210	360	70	190	1.76443	3.3221	4.35557	6.40934	1.16905	2.10194	0.68
Gstt1	GSTT1	5.51194	240	0	0	0	0	0	20	0	0	0	0	0	0.193599	-2.199
Gstt2	GSTT2	1.87438	244	0	0	0	20	0	0	0	0	0	0.306457	0	0	2.168
Gstt3	N/A	0.5207	241	0	15	30	0	0	0	0	0.263162	0.542187	0	0	0	2.908
Gstz1	GSTZ1	6.68172	188.5	20	15	0	5	5	0	0.311894	0.29362	0	0.101328	0.0950508	0	0.9545
Gtf2a2	GTF2A2	20.3164	109	0	0	0	0	5	5	0	0	0	0	0.160878	0.106569	-1.451
Gtf2b	GTF2B	20.2777	316	0	0	0	0	20	0	0	0	0	0	0.221971	0	-2.213
Gtf2f1	GTF2F1	26.284	508	0	0	0	0	10	40	0	0	0	0	0.0690383	0.182929	-3.069
Gtf2f2	GTF2F2	16.2623	249	0	0	0	0	10	20	0	0	0	0	0.140849	0.186602	-2.576
Gtf2i	GTF2I	7.99342	974.8	0	2.4	0	4	72	116	0	0.0103254	0	0.015345	0.259097	0.280136	-3.127
Gtf3c1	GTF3C1	18.3177	2101	0	0	0	0	0	180	0	0	0	0	0	0.199036	-4.422
Gtf3c2	GTF3C2	14.5408	907	0	0	0	0	50	0	0	0	0	0	0.193338	0	-3.153
Gtf3c3	GTF3C3	10.4519	882	0	0	60	30	40	120	0	0	0.296297	0.127169	0.159054	0.316081	-1.055
Gtf3c4	GTF3C4	3.98817	746.5	0	0	5	0	10	40	0	0	0.0322158	0	0.047404	0.113743	-2.0245
Gtf3c5	GTF3C5	6.1227	514	0	0	0	30	30	60	0	0	0	0.218217	0.204697	0.27119	-1.509
Gtl3	C16orf80	27.3538	193	0	50	60	0	20	30	0	1.09537	1.35406	0	0.363435	0.361118	0.314
Gtpbp1	GTPBP1	38.0459	668	5	50	50	0	80	190	0.025213	0.316477	0.326016	0	0.420018	0.660789	-1.445
Gtpbp4	GTPBP4	11.1156	634	0	20	0	0	0	0	0	0.13338	0	0	0	0	2.144
Guca1a	GUCA1A	47.4676	202	30	60	70	40	0	0	0.500266	1.25588	1.50936	0.740352	0	0	4.342
Guca1b	GUCA1B	54.909	201	10	80	10	80	0	0	0.167585	1.68284	0.216695	1.48807	0	0	4.234
Gucy1a2	GUCY1A2	2.20919	730	0	0	0	0	0	10	0	0	0	0	0	0.0318246	-1.555
Gucy1a3	GUCY1A3	37.3407	691	0	0	0	0	0	70	0	0	0	0	0	0.235345	-3.425
Gucy1b2	N/A	0.003016	816.5	0	9	0	0	0	0	0	0.0466092	0	0	0	0	1.515
Gucy1b3	GUCY1B3	14.7504	614.5	0	0	10	0	55	60	0	0	0.0715201	0	0.313672	0.224825	-2.8095
Gucy2d	N/A	0.017572	1117	174	59	0	0	0	0	0.524719	0.22333	0	0	0	0	4.514
Gucy2e	GUCY2D	35.5718	1108	2416	897	638	410	80	110	7.34493	3.42296	2.50799	1.38348	0.253224	0.230642	2.635
Gucy2f	GUCY2F	20.1878	1108	724	357	288	190	0	0	2.20105	1.36231	1.13213	0.641126	0	0	6.387
Guk1	GUK1	46.1235	213	72.5	90	60	185	15	60	1.17309	1.82433	1.26248	3.28699	0.254141	0.664165	1.155
Gulo	N/A	7.19189	440	0	0	0	0	0	20	0	0	0	0	0	0.1056	-2.227
Gulp1	GULP1	21.787	304	115	55	70	160	0	0	1.27425	0.764958	1.00293	1.96778	0	0	5.02
Gvin1	N/A	0.060365	2427	0	0	0	0	20	0	0	0	0	0	0.0289011	0	-2.219
Gyg	GYG1	11.8118	333	0	20	0	0	0	80	0	0.253942	0	0	0	0.558125	-1.766
Gyk	GK	1.23995	538.5	0	0	0	0	30	15	0	0	0	0	0.195526	0.0647599	-2.973
H13	HM13	6.126	394	0	0	0	0	0	30	0	0	0	0	0	0.176893	-2.59
H1f0	H1F0	28.9819	194	35	0	0	0	20	0	0.607711	0	0	0	0.361562	0	0.101
H1fx	H1FX	2.94332	188	90	90	170	20	60	20	1.61256	2.02411	3.93855	0.397742	1.1193	0.247148	1.039
H2afj	H2AFJ	4.92582	129	34	0	1	2.7	62	118.7	0.88781	0	0.0337641	0.0782535	1.68561	2.1377	-2.055
H2afv	H2AFV	30.9269	128	52	0	10	15	155	185	1.36843	0	0.340279	0.438138	4.24694	3.35774	-1.982
H2afx	H2AFX	5.86594	143	0	0	1	2.7	104	0	0	0	0.0304585	0.0705923	2.55065	0	-3.424
H2afy	H2AFY	14.0611	370	0	0	0	0	73	101.5	0	0	0	0	0.691963	0.63732	-4.355
H2afy2	H2AFY2	16.7025	372	0	0	0	0	300	370	0	0	0	0	2.82834	2.3107	-5.85
H2afz	H2AFZ	49.3347	128	52	15	10	15	155	185	1.36843	0.495484	0.340279	0.438138	4.24694	3.35774	-1.812
H2-Ke2	PFDN6	19.7682	127	0	0	0	0	0	10	0	0	0	0	0	0.182929	-1.549
H2-Ke6	HSD17B8	8.73599	259	280	75	90	10	20	40	3.64157	1.22436	1.51352	0.144354	0.270822	0.358794	1.533
H3f3b	H3F3A	486.059	136	47	5	10	0	54	49.8	1.1641	0.155446	0.320263	0	1.39254	0.850699	-1.003
H3f3c	HIST2H3C	38.2694	136	0	2.5	0	0	70	89.8	0	0.077723	0	0	1.80515	1.53399	-3.843
Hadh	HADH	7.34896	314	60	35	0	20	0	30	0.643654	0.471289	0	0.238139	0	0.221961	0.829
[truncated: 2,988 more rows]

## Sheet: S3
Table S3. OS proteins from literature
Mouse_OS_gene (Pierce EA, 2007)	Offcial_Mouse_gene_symbol	MapToHuman		Bovine OS gene (Molday RS, 2008)
0610007P14Rik	0610007P14Rik	C14orf1		A2M
0610008C08Rik	Apoo	APOO		AAK1
0610009K11Rik	Mul1	MUL1		AARS
0610012G03Rik	0610012G03Rik	N/A		ABCA4
0610037P05Rik	Fopnl	FOPNL		ABCA7
1110007C09Rik	1110007C09Rik	C9orf89		ABHD17B
1110007M04Rik	Ndufaf4	NDUFAF4		ABHD8
1110012J17Rik	1110012J17Rik	SOGA2		ACO2
1110014N23Rik	Vps51	VPS51		ACOT11
1110018J12Rik	Klraq1	PPP1R21		ACSL1
1110020G09Rik	Nadk2	NADK2		ACTB
1110031B06Rik	Snap47	SNAP47		ADD1
1110033J19Rik	Rps4l	N/A		ADK
1110067D22Rik	Lgalsl	LGALSL		AGPAT3
1200014M14Rik	Poc5	POC5		AHCY
1200015A19Rik	Tprgl	TPRG1L		AIFM1
1200015F23Rik	Fam82a2	RMDN3		AIPL1
1300010F03Rik	Vwa8	VWA8		AK1
1500001M20Rik	Tamm41	TAMM41		AKR1A1
1500003O03Rik	1500003O03Rik	CHP1		ALB
1500009M05Rik	Cisd2	CISD2		ALDOA
1500016O10Rik	Fam57b	FAM57B		ALDOC
1500035H01Rik	Ift46	IFT46		ALPL
1700008G05Rik	Fabp12	FABP12		ANKRD33B
1700034M03Rik	Ccdc132	CCDC132		ANP32D
1810020G14Rik	Cox16	COX16		ANP32E
1810023B24Rik	Ccdc124	CCDC124		ANXA2
1810026J23Rik	1810026J23Rik	C19orf52		ANXA4
1810034K20Rik	Mdp1	MDP1		ANXA5
1810035L17Rik	Slirp	SLIRP		ANXA6
1810044A24Rik	Trappc9	TRAPPC9		ANXA7
1810047C23Rik	Ufsp2	UFSP2		API5
1810073G14Rik	Fam114a2	FAM114A2		APOD
1810074P20Rik	Ufl1	UFL1		APOE
2010012C16Rik	Magohb	MAGOHB		APOH
2010107G23Rik	2010107G23Rik	C10orf35		ARFGEF1
2310001A20Rik	Apmap	APMAP		ARHGAP1
2310005N03Rik	Fam36a	COX20		ARL1
2310014G06Rik	Sdr39u1	SDR39U1		ARL3
2310056P07Rik	Fam162a	FAM162A		ARL6
2310057D15Rik	Enoph1	ENOPH1		ARL8A
2310079N02Rik	Ntpcr	NTPCR		ARL8B
2400001E08Rik	Lamtor1	LAMTOR1		ARMC9
2410003P15Rik	Uqcc	UQCC		ARPC4
2410005O16Rik	Fam82b	RMDN1		ARR3
2410015M20Rik	2410015M20Rik	C19orf70		ARRB2
2410018G20Rik	Mzt2	MZT2A		ATIC
2410127E16Rik	Ppfia3	PPFIA3		ATP1A1
2410166I05Rik	Mtfr1l	MTFR1L		ATP1A2
2510042P03Rik	Ttc30b	TTC30B		ATP1A3
2600001B17Rik	Lsm12	LSM12		ATP1B1
2600009E05Rik	Ddrgk1	DDRGK1		ATP1B2
2610029G23Rik	Pbdc1	PBDC1		ATP2B1
2610034M16Rik	2610034M16Rik	N/A		ATP5A1
2610204L23Rik	Ccdc47	CCDC47		ATP5B
2610207I05Rik	Smg1	SMG1		ATP5C1
2610312B22Rik	Zc3h15	ZC3H15		ATP5H
2610510H03Rik	Fam98b	FAM98B		ATP5I
2610511M17Rik	Sipa1l3	SIPA1L3		ATP5O
2700060E02Rik	2700060E02Rik	C14orf166		ATP6V0A1
2700085E05Rik	Glod4	GLOD4		ATP6V1A
2810037C14Rik	Armc10	ARMC10		ATP6V1B2
2810039F03Rik	Dzank1	DZANK1		ATP8A2
2810405J04Rik	Fam98a	FAM98A		BASP1
2810405K02Rik	2810405K02Rik	FAM213B		BBS1
2810422B04Rik	Ptcd3	PTCD3		BBS2
2900010M23Rik	2900010M23Rik	MNF1		BBS4
2900041A09Rik	Tppp	TPPP		BBS5
2900042B11Rik	Hspb11	HSPB11		BBS9
2900057D21Rik	Appl1	APPL1		BSG
2900062L11Rik	Arxes2	N/A		CA14
2900064A13Rik	Emc7	EMC7		CA2
2900075B16Rik	Micu3	MICU3		CADM1
3110023E09Rik	Chid1	CHID1		CADM2
3300001P08Rik	Luc7l3	LUC7L3		CALB2
3322402L07Rik	Rd3	RD3		CALM1
4432405B04Rik	Tctn2	TCTN2		CAMK2D
4631427C17Rik	Ahcyl2	AHCYL2		CAND1
4732456N10Rik	4732456N10Rik	N/A		CBR1
4732495G21Rik	Actbl2	ACTBL2		CCT2
4733401H18Rik	Ndufaf3	NDUFAF3		CCT3
4921505C17Rik	Rictor	RICTOR		CCT6A
4921531G14Rik	Emc2	EMC2		CCT8
4922501C03Rik	Cep162	CEP162		CDC42
4930430E16Rik	Fam161a	FAM161A		CDHR1
4930431B11Rik	Lca5	LCA5		CFL1
4930504E06Rik	Fam63a	FAM63A		CHMP4B
4930511A21Rik	Ppp2r3c	PPP2R3C		CHMP6
4930519N16Rik	Nxnl2	NXNL2		CKAP5
4930521E07Rik	Tctn3	TCTN3		CKB
4930544G21Rik	Sphkap	SPHKAP		CKMT1A
4930572J05Rik	Them6	THEM6		CLTC
4930583H14Rik	Mgarp	MGARP		CLVS1
4932417H02Rik	Rptor	RPTOR		CNGA1
4932417I16Rik	Tmem231	TMEM231		CNGA3
4932438A13Rik	4932438A13Rik	KIAA1109		CNGB1
4933425L03Rik	Nbas	NBAS		CNP
5033414D02Rik	5033414D02Rik	PLGRKT		COX4I1
5230400G24Rik	Mff	MFF		COX5B
5330439C02Rik	Gpr179	GPR179		CPNE1
5730419I09Rik	C2cd5	C2CD5		CRABP1
5730469M10Rik	5730469M10Rik	FAM213A		CRB1
5730509K17Rik	Cc2d2a	CC2D2A		CRMP1
5730557B15Rik	Ankrd33b	ANKRD33B		CRYAB
6330407J23Rik	6330407J23Rik	SOGA3		CRYM
6430548M08Rik	6430548M08Rik	KIAA0513		CS
6530401N04Rik	Dtd2	DTD2		CSN1S1
6720456B07Rik	Brk1	BRK1		CSNK1A1L
9030227G01Rik	Fryl	FRYL		CTNNA1
9030624J02Rik	9030624J02Rik	C16orf62		CYC1
9130229H14Rik; Mia3	Mia3	MIA3		CYCS
9330129D05Rik	Acad12	N/A		CYSTM1
9430016H08Rik	9430016H08Rik	C2orf47		DCTN1
9430083G14Rik	Apool	APOOL		DDAH1
A230048G03Rik	Heatr5b	HEATR5B		DDAH2
A330068P14Rik	Pitpnm3	PITPNM3		DHDH
A330104H05Rik	Ermn	ERMN		DLST
A830091I15Rik	Sarm1	SARM1		DNAJC5
A930017N06Rik	Elfn1	ELFN1		DNM1
A930041I02Rik	Scai	SCAI		DNM2
Aadacl1	Nceh1	NCEH1		DPP3
Aak1	Aak1	AAK1		DPYSL2
Aars	Aars	AARS		DPYSL3
Aarsd1	Aarsd1	AARSD1		DYNC1H1
Abca4	Abca4	ABCA4		EEF1B2
Abca8b	Abca8b	ABCA8B		EEF2
Abcb8	Abcb8	ABCB8		ENO1
Abcd2	Abcd2	ABCD2		ENO2
Abcd3	Abcd3	ABCD3		EPB41L2
Abcf1	Abcf1	ABCF1		ERP29
Abcf2	Abcf2	ABCF2		EZR
Abcf3	Abcf3	ABCF3		FABP5
Abhd10	Abhd10	ABHD10		FABP7
Abhd12	Abhd12	ABHD12		FAM3C
Abhd14b	Abhd14b	ABHD14B		FBXL2
Abhd6	Abhd6	ABHD6		FIS1
Abi1	Abi1	ABI1		FKBP4
Ablim1	Ablim1	ABLIM1		FSCN1
Ablim2	Ablim2	ABLIM2		FTL
Abpe	Abpe	N/A		GAPDH
Acaa1a	Acaa1a	ACAA1		GAPDHS
Acaca	Acaca	ACACA		GBAS
Acbd5	Acbd5	ACBD5		GDI1
Acly	Acly	ACLY		GDI2
Acot11	Acot11	ACOT11		GLB1L2
Acot7	Acot7	ACOT7		GLOD4
Acot8	Acot8	ACOT8		GLUL
Acox1	Acox1	ACOX1		GNA11
Acp1	Acp1	ACP1		GNAI2
Acsl3	Acsl3	ACSL3		GNAO1
Acsl4	Acsl4	ACSL4		GNAT1
Acsl6	Acsl6	ACSL6		GNAT2
Acta1	Acta1	ACTA1		GNB1
Actb	Actb	ACTB		GNB2
Actn1	Actn1	ACTN1		GNB3
Actn3	Actn3	ACTN3		GNB4
Actn4	Actn4	ACTN4		GNB5
Actr10	Actr10	ACTR10		GNG7
Actr1a	Actr1a	ACTR1A		GNGT1
Actr1b	Actr1b	ACTR1B		GNGT2
Actr2	Actr2	ACTR2		GOLGA7
Actr3	Actr3	ACTR3		GOT1
Actr3b	Actr3b	ACTR3B		GOT2
Adck1	Adck1	ADCK1		GPI
Add1	Add1	ADD1		GPR98
Add2	Add2	ADD2		GPX4
Add3	Add3	ADD3		GSN
Agpat3	Agpat3	AGPAT3		GSTM2
Agpat5	Agpat5	AGPAT5		GSTM3
Ahcy	Ahcy	AHCY		GSTM4
Ahcyl1	Ahcyl1	AHCYL1		GSTP1
Ahi1	Ahi1	AHI1		GUCY2D
Ahnak	Ahnak	AHNAK		GUCY2F
AI314180	AI314180	KIAA0368		GUK1
AI314976	Oard1	OARD1		HAGH
AI315068	Vps8	VPS8		HAVCR1
AI317237	Dip2b	DIP2B		HBA1
AI413782	Vipas39	VIPAS39		HBB
AI427515	Vat1l	VAT1L		HDAC11
AI450948	AI450948	N/A		HDHD2
AI597013	Akna	AKNA		HEBP1
Aip	Aip	AIP		HIST1H1E
Aipl1	Aipl1	AIPL1		HK1
Ak1	Ak1	AK1		HK2
AK129128	Ttc37	TTC37		HNRNPA0
Akap12	Akap12	AKAP12		HNRNPA1
Akap9	Akap9	AKAP9		HNRNPAB
Akr1a4	Akr1a1	AKR1A1		HNRNPD
Akr1b3	Akr1b3	AKR1B1		HNRNPK
Akr1e1	Akr1e1	AKR1E2		HPCAL1
AL033314	Snd1	SND1		HSP90AA1
Aldh1a1	Aldh1a1	ALDH1A1		HSP90AB1
Aldh3a2	Aldh3a2	ALDH3A2		HSP90B1
Aldh4a1	Aldh4a1	ALDH4A1		HSPA1B
Aldh7a1	Aldh7a1	ALDH7A1		HSPA2
Aldoa	Aldoa	ALDOA		HSPA4
Aldoc	Aldoc	ALDOC		HSPA4L
Alg2	Alg2	ALG2		HSPA5
Alms1	Alms1	ALMS1		HSPA6
Als2	Als2	ALS2		HSPA8
Als2cr4	Tmem237	TMEM237		HSPA9
Amph	Amph	AMPH		HSPB1
Ank1	Ank1	ANK1		HSPD1
Ank2	Ank2	ANK2		HSPE1
Ank3	Ank3	ANK3		IGLL1
Ankrd17	Ankrd17	ANKRD17		IMMT
Ankrd26	Ankrd26	ANKRD26		IMPDH1
Anp32a	Anp32a	ANP32A		ITFG3
Anp32e	Anp32e	ANP32E		KPNB1
Anxa1	Anxa1	ANXA1		KRAS
Anxa4	Anxa4	ANXA4		KRT2
Anxa5	Anxa5	ANXA5		KRT6B
Anxa6	Anxa6	ANXA6		KRT79
Anxa7	Anxa7	ANXA7		LAMTOR1
Ap1b1	Ap1b1	AP1B1		LAMTOR2
Ap1g1	Ap1g1	AP1G1		LAMTOR5
Ap1m1	Ap1m1	AP1M1		LDHA
Ap2a1	Ap2a1	AP2A1		LDHB
Ap2a2	Ap2a2	AP2A2		LMAN1
Ap2b1	Ap2b1	AP2B1		LPCAT2
Ap2m1	Ap2m1	AP2M1		LRRC57
Ap2s1	Ap2s1	AP2S1		LSM3
Ap3b1	Ap3b1	AP3B1		LYPLA1
Ap3b2	Ap3b2	AP3B2		LZTFL1
Ap3d1	Ap3d1	AP3D1		MAN2A1
Ap3m1	Ap3m1	AP3M1		MAP1A
Ap3m2	Ap3m2	AP3M2		MAP1B
Apex1	Apex1	APEX1		MAP2
Api5	Api5	API5		MAP4
Apoa1	Apoa1	APOA1		MAPK1
Apoa1bp	Apoa1bp	APOA1BP		MDH1
Apobec2	Apobec2	APOBEC2		MDH2
Apoe	Apoe	APOE		MFGE8
Aprt	Aprt	APRT		MGLL
Aqp1	Aqp1	AQP1		MIF
Arcn1	Arcn1	ARCN1		MOGS
Arf1	Arf1	ARF1		MRAS
Arf2	Arf2	N/A		MTX2
Arf4	Arf4	ARF4		MYH10
Arf5	Arf5	ARF5		MYH14
Arf6	Arf6	ARF6		MYL6
Arfgap1	Arfgap1	ARFGAP1		MYO5A
Arfgef1	Arfgef1	ARFGEF1		MYO6
Arfgef2	Arfgef2	ARFGEF2		NCALD
Arhgap1	Arhgap1	ARHGAP1		NCAM1
Arhgap24	Arhgap24	ARHGAP24		NCL
Arhgap5	Arhgap5	ARHGAP5		NDRG1
Arhgdia	Arhgdia	ARHGDIA		NDUFS1
Arhgef11	Arhgef11	ARHGEF11		NDUFV2
Arhgef2	Arhgef2	ARHGEF2		NIM1
Arhgef7	Arhgef7	ARHGEF7		NIPSNAP1
Arl1	Arl1	ARL1		NME1
Arl13b	Arl13b	ARL13B		NPEPPS
Arl3	Arl3	ARL3		NPTN
Arl6	Arl6	ARL6		NRAS
Arl8a	Arl8a	ARL8A		NSF
Arl8b	Arl8b	ARL8B		NT5E
Armc1	Armc1	ARMC1		NTM
Armet	Manf	MANF		NXNL1
Arpc1a	Arpc1a	ARPC1A		OPN1LW
Arpc2	Arpc2	ARPC2		OPN1MW
Arpc3	Arpc3	ARPC3		OPN1SW
Arpc4	Arpc4	ARPC4		OPTN
Arpc5l	Arpc5l	ARPC5L		P4HB
Arr3	Arr3	ARR3		PACSIN1
Arvcf	Arvcf	ARVCF		PAEP
As3mt	As3mt	AS3MT		PAFAH1B2
Asah1	Asah1	ASAH1		PAFAH1B3
Ascc3l1	Snrnp200	SNRNP200		PARK7
Asna1	Asna1	ASNA1		PBXIP1
Asrgl1	Asrgl1	ASRGL1		PCBP1
Ass1	Ass1	ASS1		PCBP2
Atad1	Atad1	ATAD1		PCMT1
Atad3a	Atad3a	ATAD3A		PDC
Atg3	Atg3	ATG3		PDCD6IP
Atp1a1	Atp1a1	ATP1A1		PDE6A
Atp1a2	Atp1a2	ATP1A2		PDE6B
Atp1a3	Atp1a3	ATP1A3		PDE6C
Atp1a4	Atp1a4	ATP1A4		PDIA3
Atp1b1	Atp1b1	ATP1B1		PDIA4
Atp1b2	Atp1b2	ATP1B2		PEBP1
Atp1b3	Atp1b3	ATP1B3		PFKL
Atp2a2	Atp2a2	ATP2A2		PFKM
Atp2b1	Atp2b1	ATP2B1		PFKP
Atp2b2	Atp2b2	ATP2B2		PGAM4
Atp2b3	Atp2b3	ATP2B3		PGD
Atp2b4	Atp2b4	ATP2B4		PGK1
Atp2c1	Atp2c1	ATP2C1		PGM1
Atp6v0a1	Atp6v0a1	ATP6V0A1		PHB
Atp6v0d1	Atp6v0d1	ATP6V0D1		PHB2
Atp6v1a	Atp6v1a	ATP6V1A		PHGDH
Atp6v1b2	Atp6v1b2	ATP6V1B2		PKM
Atp6v1c1	Atp6v1c1	ATP6V1C1		PLEKHB1
Atp6v1d	Atp6v1d	ATP6V1D		PLEKHB2
Atp6v1e1	Atp6v1e1	ATP6V1E1		PNP
Atp6v1f	Atp6v1f	ATP6V1F		PPA1
Atp6v1g1	Atp6v1g1	ATP6V1G1		PPEF2
Atp6v1h	Atp6v1h	ATP6V1H		PPIB
Atp8a2	Atp8a2	ATP8A2		PPM1H
Atxn10	Atxn10	ATXN10		PPP2R1A
Atxn2	Atxn2	ATXN2		PPP3CA
Atxn2l	Atxn2l	ATXN2L		PPP3CB
AU016693	Cep120	CEP120		PPP3CC
AU024582	Sec16a	SEC16A		PPP3R1
AU042671	Gm15800	HECTD4		PRDX1
AU045404	Alg10b	ALG10		PRDX2
Aytl1	Lpcat2	LPCAT2		PRDX3
Aytl2	Lpcat1	LPCAT1		PRDX6
Azi1	Azi1	AZI1		PRKACA
B230112C05Rik	Fam169a	FAM169A		PRKAR2A
B230339M05Rik	Ralgapb	RALGAPB		PRKCA
Bag5	Bag5	BAG5		PRKCB
Banf1	Banf1	BANF1		PRKCD
Basp1	Basp1	BASP1		PRKCE
Bat1a	Ddx39b	DDX39B		PRKCQ
Bat2	Prrc2a	PRRC2A		PRKD1
Bat2d	Prrc2c	PRRC2C		PRKD3
Bat3	Bag6	BAG6		PROM1
Bbs1	Bbs1	BBS1		PRPH2
Bbs2	Bbs2	BBS2		PSMA7
Bbs4	Bbs4	BBS4		PTPN9
Bbs5	Bbs5	BBS5		QDPR
Bbs7	Bbs7	BBS7		RAB10
BC010304	Fam120a	FAM120A		RAB11B
BC018371	Acsf2	ACSF2		RAB14
BC028440	B9d2	B9D2		RAB18
BC029684	Lactbl1	LACTBL1		RAB1A
BC038479	Glb1l2	GLB1L2		RAB1B
BC057079	BC057079	FOCAD		RAB21
Bcap31	Bcap31	BCAP31		RAB2A
Bcas2	Bcas2	BCAS2		RAB2B
Bcat1	Bcat1	BCAT1		RAB30
Bcl2l2	Bcl2l2	BCL2L2		RAB32
Bcr	Bcr	BCR		RAB33B
Bdh2	Bdh2	BDH2		RAB35
Bfsp1	Bfsp1	BFSP1		RAB39B
Bfsp2	Bfsp2	BFSP2		RAB3A
Bin1	Bin1	BIN1		RAB3C
Blmh	Blmh	BLMH		RAB3D
Bphl	Bphl	BPHL		RAB4A
Bpnt1	Bpnt1	BPNT1		RAB4B
Bri3bp	Bri3bp	BRI3BP		RAB5A
Brwd2	Wdr11	WDR11		RAB5B
Bsg	Bsg	BSG		RAB5C
Bsn	Bsn	BSN		RAB6A
Btf3	Btf3	BTF3		RAB6B
Btf3l4	Btf3l4	BTF3L4		RAB7A
Bzw2	Bzw2	BZW2		RAB8A
C030011O14Rik	Fam73a	FAM73A		RAB8B
C030014M07Rik	Efr3b	EFR3B		RAB9A
C130076O07Rik	Nrcam	NRCAM		RAC1
C230096C10Rik	Emc1	EMC1		RAC3
C330016K18Rik	Slc4a5	SLC4A5		RALA
C430014M02Rik	Fkbp15	FKBP15		RALB
C630002B14Rik	Nt5dc3	NT5DC3		RANBP6
C79127	Ppm1n	PPM1N		RAP1A
C85492	Pomgnt2	POMGNT2		RAP1B
C920006C10Rik	Efr3a	EFR3A		RAP2C
Cacna1f	Cacna1f	CACNA1F		RASA4
Cacna2d1	Cacna2d1	CACNA2D1		RASAL1
Cacna2d2	Cacna2d2	CACNA2D2		RBBP4
Cacna2d4	Cacna2d4	CACNA2D4		RBP3
Cacnb2	Cacnb2	CACNB2		RCVRN
Cacybp	Cacybp	CACYBP		RD3
Cad	Cad	CAD		RDH14
Cadps	Cadps	CADPS		RDH8
Calb1	Calb1	CALB1		RDX
Calb2	Calb2	CALB2		REEP6
Calcoco1	Calcoco1	CALCOCO1		RGR
Cald1	Cald1	CALD1		RGS9
Calm1	Calm1	N/A		RGS9BP
Calr	Calr	CALR		RHO
Calu	Calu	CALU		RHOA
Camk2a	Camk2a	CAMK2A		RHOB
Camk2b	Camk2b	CAMK2B		RHOC
Camk2d	Camk2d	CAMK2D		RHOG
Camk2g	Camk2g	CAMK2G		GRK1
Camkv	Camkv	CAMKV		RLBP1
Camsap1	Camsap1	CAMSAP1		ROM1
Camsap1l1	Camsap2	CAMSAP2		RP1
Cand1	Cand1	CAND1		RP1L1
Canx	Canx	CANX		RP2
Cap1	Cap1	CAP1		RPE65
Capn2	Capn2	CAPN2		RPL23A
Capn6	Capn6	CAPN6		RPL9
Capns1	Capns1	CAPNS1		RPLP2
Capza1	Capza1	CAPZA1		RPS28
Capza2	Capza2	CAPZA2		RPS3
Capzb	Capzb	CAPZB		RPS4X
Car14	Car14	CA14		RPS7
Car2	Car2	CA2		RS1
Cars	Cars	CARS		RTN4
Cask	Cask	CASK		S100A16
Caskin1	Caskin1	CASKIN1		SAG
Caskin2	Caskin2	CASKIN2		SAR1A
Cat	Cat	CAT		SCAMP5
Cbr1	Cbr1	CRB1		SDR39U1
Cbr4	Cbr4	CBR4		SEC22B
Cbx3	Cbx3	CBX3		SEPT7
Cc2d1a	Cc2d1a	CC2D1A		SERINC3
Ccdc104	Ccdc104	CCDC104		SERPINF1
Ccdc109a	Ccdc109a	MCU		SH3GL2
Ccdc126	Ccdc126	CCDC126		SIRT2
Ccdc127	Ccdc127	CCDC127		SLC16A1
Ccdc22	Ccdc22	CCDC22		SLC1A3
Ccdc44	Taco1	TACO1		SLC1A4
Ccdc51	Ccdc51	CCDC51		SLC22A23
Ccdc52	Spice1	SPICE1		SLC24A1
Ccdc56	Coa3	COA3		SLC24A2
Ccdc93	Ccdc93	CCDC93		SLC25A12
Ccm2	Ccm2	CCM2		SLC25A22
Cct2	Cct2	CCT2		SLC25A5
Cct3	Cct3	CCT3		SLC25A6
Cct4	Cct4	CCT4		SLC2A1
Cct5	Cct5	CCT5		SLC30A1
Cct6a	Cct6a	CCT6A		SLC38A3
Cct7	Cct7	CCT7		SLC3A2
Cct8	Cct8	CCT8		SLC44A1
Cd47	Cd47	CD47		SNAP25
Cd81	Cd81	CD81		SNAP91
Cdc37	Cdc37	CDC37		SOD1
Cdc42	Cdc42	CDC42		SPTAN1
Cdc42bpa	Cdc42bpa	CDC42BPA		SPTBN1
Cdc42bpb	Cdc42bpb	CDC42BPB		ST13
Cdc42ep4	Cdc42ep4	CDC42EP4		STIP1
Cdh2	Cdh2	CDH2		STRAP
Cdipt	Cdipt	CDIPT		STX3
Cdk5	Cdk5	CDK5		STX4
Cdk5rap3	Cdk5rap3	CDK5RAP3		STX7
Cdr2	Cdr2	CDR2		STXBP1
Cds2	Cds2	CDS2		STXBP3
Cend1	Cend1	CEND1		STXBP5
Centg2	Agap1	AGAP1		SYNCRIP
Cep110	Cntrl	CNTRL		SYNJ1
Cep135	Cep135	CEP135		SYT1
Cep164	Cep164	CEP164		TALDO1
Cep250	Cep250	CEP250		TARS
Cep290	Cep290	CEP290		TBC1D10A
Cep350	Cep350	CEP350		TCP1
Cep78	Cep78	CEP78		TKT
Cetn2	Cetn2	CETN2		TLN2
Cetn3	Cetn3	CETN3		TMEM237
Cfh	Cfh	CFH		TMEM30A
Cfl1	Cfl1	CFL1		TMEM63B
Chchd2	Chchd2	CHCHD2		TMEM67
Chchd6	Chchd6	CHCHD6		TOLLIP
Chmp2a	Chmp2a	CHMP2A		TOM1
Chmp6	Chmp6	CHMP6		TOM1L2
Cirbp	Cirbp	CIRBP		TPI1
Ckap4	Ckap4	CKAP4		TTC8
Ckap5	Ckap5	CKAP5		TUBA1C
Clasp1	Clasp1	CLASP1		TUBA4A
Clasp2	Clasp2	CLASP2		TUBB
Clic1	Clic1	CLIC1		TUBB2A
Clic6	Clic6	CLIC6		TUBB2B
Clint1	Clint1	CLINT1		TUBB3
Clpb	Clpb	CLPB		TUBB4A
Clta	Clta	CLTA		TUBB4B
Cltc	Cltc	CLTC		TUFM
Clu	Clu	CLU		UBA1
Cluap1	Cluap1	CLUAP1		UBC
Cmpk	Cmpk1	CMPK1		UBE2N
Cndp2	Cndp2	CNDP2		UBL3
Cnga1	Cnga1	CNGA1		UNC119
Cnga3	Cnga3	CNGA3		UQCRC1
Cngb1b; BC016201	Cngb1	CNGB1		USO1
Cnn3	Cnn3	CNN3		VAMP2
Cnnm4	Cnnm4	CNNM4		VAT1
Cnot1	Cnot1	CNOT1		VCP
Cnot10	Cnot10	CNOT10		VDAC1
Cnot2	Cnot2	CNOT2		VDAC2
Cnot3	Cnot3	CNOT3		VDAC3
Cnot7	Cnot7	CNOT7		VTA1
Cnp1	Cnp	CNP		WBP2
Cntn1	Cntn1	CNTN1		YBX1
Cntnap1	Cntnap1	CNTNAP1		YES1
Cntnap2	Cntnap2	CNTNAP2		YWHAB
Cntrob	Cntrob	CNTROB		YWHAE
Cog1	Cog1	COG1		YWHAG
Cog2	Cog2	COG2		YWHAH
Cog3	Cog3	COG3		YWHAQ
Cog4	Cog4	COG4		YWHAZ
Cog5	Cog5	COG5		ZDHHC20
Cog7	Cog7	COG7
Col18a1	Col18a1	COL18A1
Commd1	Commd1	COMMD1
Commd2	Commd2	COMMD2
Commd3	Commd3	COMMD3
Commd4	Commd4	COMMD4
Commd5	Commd5	COMMD5
Commd7	Commd7	COMMD7
Commd8	Commd8	COMMD8
Comtd1	Comtd1	COMTD1
Copa	Copa	COPA
Copb1	Copb1	COPB1
Copb2	Copb2	COPB2
Cope	Cope	COPE
Copg	Copg	COPG1
Copg2	Copg2	COPG2
Cops2	Cops2	N/A
Cops4	Cops4	COPS4
Cops7a	Cops7a	COPS7A
Cops8	Cops8	COPS8
Copz1	Copz1	COPZ1
Coro1c	Coro1c	CORO1C
Coro2b	Coro2b	CORO2B
Cotl1	Cotl1	COTL1
Cp	Cp	CP
Cpeb4	Cpeb4	CPEB4
Cplx3	Cplx3	CPLX3
Cplx4	Cplx4	CPLX4
Crabp1	Crabp1	CRABP1
Crmp1	Crmp1	CRMP1
Crocc	Crocc	CROCC
Cryaa	Cryaa	CRYAA
Cryab	Cryab	CRYAB
Cryba1	Cryba1	CRYBA1
Cryba2	Cryba2	CRYBA2
Cryba4	Cryba4	CRYBA4
Crybb1	Crybb1	CRYBB1
Crybb2	Crybb2	CRYBB2
Crybb3	Crybb3	CRYBB3
Crygb	Crygb	CRYGB
Crygs	Crygs	CRYGS
Crym	Crym	CRYM
Cryz	Cryz	CRYZ
Cryzl1	Cryzl1	CRYZL1
Csda	Csda	CSDA
Cse1l	Cse1l	CSE1L
Csnk1a1	Csnk1a1	CSNK1A1
Csnk1d	Csnk1d	CSNK1D
Csnk1g1	Csnk1g1	CSNK1G1
Csnk1g2	Csnk1g2	CSNK1G2
Csnk1g3	Csnk1g3	CSNK1G3
Csnk2a1	Csnk2a1	CSNK2A1
Csnk2a2	Csnk2a2	CSNK2A2
Csnk2b	Csnk2b	CSNK2B
Cspg4	Cspg4	CSPG4
Ctbp1	Ctbp1	CTBP1
Ctbp2	Ctbp2	CTBP2
Ctnna1	Ctnna1	CTNNA1
Ctnna2	Ctnna2	CTNNA2
Ctnna3	Ctnna3	CTNNA3
Ctnnb1	Ctnnb1	CTNNB1
Ctnnd1	Ctnnd1	CTNND1
Ctnnd2	Ctnnd2	CTNND2
Ctsb	Ctsb	CTSB
Cttn	Cttn	CTTN
Cul1	Cul1	CUL1
Cul3	Cul3	CUL3
Cul4a	Cul4a	CUL4A
Cul5	Cul5	CUL5
Cyb5	Cyb5	CYB5A
Cyfip1	Cyfip1	CYFIP1
Cyfip2	Cyfip2	CYFIP2
Cygb	Cygb	CYGB
Cyln2	Clip2	CLIP2
D030016E14Rik	Trappc11	TRAPPC11
D030074E01Rik	Trappc8	TRAPPC8
D10Jhu81e	D10Jhu81e	C21orf33
D10Wsu52e	D10Wsu52e	C22orf28
D13Wsu177e	Nop16	NOP16
D14Ertd171e	Erc2	ERC2
D14Ertd581e	Pibf1	PIBF1
D15Ertd682e	Rpap3	RPAP3
D17Wsu104e	D17Wsu104e	C19orf10
D1Bwg0212e	Cnot11	CNOT11
D230012E17Rik	Pgap1	PGAP1
D430033N04Rik	Wdr60	WDR60
D630045J12Rik	D630045J12Rik	KIAA1549
D6Wsu116e	Fam21	FAM21A
D6Wsu176e	Fam3c	FAM3C
D930005D10Rik	Radil	RADIL
D930010J01Rik	Macrod1	MACROD1
Daam1	Daam1	DAAM1
Dab2ip	Dab2ip	DAB2IP
Dars	Dars	DARS
Dbn1	Dbn1	DBN1
Dbnl	Dbnl	DBNL
Dcakd	Dcakd	DCAKD
Dcamkl1	Dclk1	DCLK1
Dcamkl2	Dclk2	DCLK2
Dctn1	Dctn1	DCTN1
Dctn2	Dctn2	DCTN2
Dctn3	Dctn3	DCTN3
Dctn4	Dctn4	DCTN4
Ddah1	Ddah1	DDAH1
Ddah2	Ddah2	DDAH2
Ddb1	Ddb1	DDB1
Ddef1	Asap1	ASAP1
Ddost	Ddost	DDOST
Ddt	Ddt	DDT
Ddx1	Ddx1	DDX1
Ddx17	Ddx17	DDX17
Ddx19a	Ddx19a	DDX19A
Ddx3x	Ddx3x	DDX3X
Ddx3y	Ddx3y	DDX3Y
Ddx48	Eif4a3	EIF4A3
Ddx5	Ddx5	DDX5
Ddx6	Ddx6	DDX6
Dgke	Dgke	DGKE
Dgki	Dgki	DGKI
Dhrs4	Dhrs4	DHRS4
Dhrs7b	Dhrs7b	DHRS7B
Dhx16	Dhx16	DHX16
Dhx29	Dhx29	DHX29
Dhx30	Dhx30	DHX30
Dhx36	Dhx36	DHX36
Dhx9	Dhx9	DHX9
Dip2c	Dip2c	DIP2C
Dip3b	Appl2	APPL2
Diras2	Diras2	DIRAS2
Dlgap1	Dlgap1	DLGAP1
Dlgap4	Dlgap4	DLGAP4
Dlgh1	Dlg1	DLG1
Dlgh2	Dlg2	DLG2
Dlgh3	Dlg3	DLG3
Dlgh4	Dlg4	DLG4
Dmd	Dmd	DMD
Dmxl1	Dmxl1	DMXL1
Dmxl2	Dmxl2	DMXL2
Dnaja1	Dnaja1	DNAJA1
Dnaja2	Dnaja2	DNAJA2
Dnaja4	Dnaja4	DNAJA4
Dnajb1	Dnajb1	DNAJB1
Dnajb10	Dnajb2	DNAJB2
Dnajb11	Dnajb11	DNAJB11
Dnajb4	Dnajb4	DNAJB4
Dnajb6	Dnajb6	DNAJB6
Dnajc11	Dnajc11	DNAJC11
Dnajc13	Dnajc13	DNAJC13
Dnajc2	Dnajc2	DNAJC2
Dnajc3	Dnajc3	DNAJC3
Dnajc5	Dnajc5	DNAJC5
Dnajc6	Dnajc6	DNAJC6
Dnajc7	Dnajc7	DNAJC7
Dnm1	Dnm1	DNM1
Dnm1l	Dnm1l	DNM1L
Dnm2	Dnm2	DNM2
Dnm3	Dnm3	DNM3
Dnpep	Dnpep	DNPEP
Dock1	Dock1	DOCK1
Dock3	Dock3	DOCK3
Dock4	Dock4	DOCK4
Dock7	Dock7	DOCK7
Dock9	Dock9	DOCK9
Dpm1	Dpm1	DPM1
Dpp6	Dpp6	DPP6
Dpysl3	Dpysl3	DPYSL3
Dpysl4	Dpysl4	DPYSL4
Dpysl5	Dpysl5	DPYSL5
Drg1	Drg1	DRG1
Dsp	Dsp	DSP
Dst	Dst	DST
Dstn	Dstn	DSTN
Dtymk	Dtymk	DTYMK
Dusp3	Dusp3	DUSP3
Dync1h1	Dync1h1	DYNC1H1
Dync1i1	Dync1i1	DYNC1I1
Dync1i2	Dync1i2	DYNC1I2
Dync1li1	Dync1li1	DYNC1LI1
Dync1li2	Dync1li2	DYNC1LI2
Dync2h1	Dync2h1	DYNC2H1
Dync2li1	Dync2li1	DYNC2LI1
Dynll1	Dynll1	DYNLL1
Dynll2	Dynll2	DYNLL2
Dynlrb1	Dynlrb1	DYNLRB1
E130103I17Rik	Bbs9	BBS9
E130304F04Rik	Nim1k	NIM1K
E430012M05Rik	Xpnpep3	XPNPEP3
E430025E21Rik	E430025E21Rik	KIAA0196
E430034L04Rik	G3bp2	G3BP2
Ecsit	Ecsit	ECSIT
Edc4	Edc4	EDC4
Eef1a1	Eef1a1	EEF1A1
Eef1a2	Eef1a2	EEF1A2
Eef1b2	Eef1b2	EEF1B2
Eef1d	Eef1d	EEF1D
Eef1e1	Eef1e1	EEF1E1
Eef1g	Eef1g	EEF1G
Eef2	Eef2	EEF2
Eefsec	Eefsec	EEFSEC
Efcbp2	Necab2	NECAB2
Efhd2	Efhd2	EFHD2
Eftud2	Eftud2	EFTUD2
Ehd1	Ehd1	EHD1
Ehd3	Ehd3	EHD3
Ehd4	Ehd4	EHD4
Eif1	Eif1	EIF1
Eif2a	Eif2a	EIF2A
Eif2b2	Eif2b2	EIF2B2
Eif2b3	Eif2b3	EIF2B3
Eif2b4	Eif2b4	EIF2B4
Eif2b5	Eif2b5	EIF2B5
Eif2c1	Eif2c1	EIF2C1
Eif2c2	Eif2c2	EIF2C2
Eif2c3	Eif2c3	EIF2C3
Eif2c4	Eif2c4	EIF2C4
Eif2s1	Eif2s1	EIF2S1
Eif2s2	Eif2s2	EIF2S2
Eif2s3x	Eif2s3x	EIF2S3
Eif3s1	Eif3j	EIF3J
Eif3s10	Eif3a	EIF3A
Eif3s12	Eif3k	EIF3K
Eif3s2	Eif3i	EIF3I
Eif3s3	Eif3h	EIF3H
Eif3s4	Eif3g	EIF3G
Eif3s5	Eif3f	EIF3F
Eif3s6	Eif3e	EIF3E
Eif3s6ip	Eif3l	EIF3L
Eif3s7	Eif3d	EIF3D
Eif3s8	Eif3c	EIF3C
Eif3s9	Eif3b	EIF3B
Eif4a1	Eif4a1	EIF4A1
Eif4a2	Eif4a2	EIF4A2
Eif4b	Eif4b	EIF4B
Eif4e	Eif4e	EIF4E
Eif4e2	Eif4e2	EIF4E2
Eif4enif1	Eif4enif1	EIF4ENIF1
Eif4g1	Eif4g1	EIF4G1
Eif4g2	Eif4g2	EIF4G2
Eif4g3	Eif4g3	EIF4G3
Eif5a	Eif5a	EIF5A
Eif5b	Eif5b	EIF5B
Elavl1	Elavl1	ELAVL1
Elavl2	Elavl2	ELAVL2
Elmo2	Elmo2	ELMO2
Elmod2	Elmod2	ELMOD2
Elp3	Elp3	ELP3
Eml1	Eml1	EML1
Eml3	Eml3	EML3
Eml4	Eml4	EML4
Eml5	Eml5	EML5
Enah	Enah	ENAH
Endogl1	Exog	EXOG
Eno1	Eno1	ENO1
Eno2	Eno2	ENO2
Epb4.1	Epb4.1	EPB41
Epb4.1l1	Epb4.1l1	EPB41L1
Epb4.1l2	Epb4.1l2	EPB41L2
Epb4.1l3	Epb4.1l3	EPB41L3
Epdr2	Epdr1	EPDR1
Ephb2	Ephb2	EPHB2
Epn1	Epn1	EPN1
Eppb9	B9d1	B9D1
Eprs	Eprs	EPRS
Eps15l1	Eps15l1	EPS15L1
Eps8	Eps8	EPS8
Erbb2ip	Erbb2ip	ERBB2IP
Erc1	Erc1	ERC1
Erp29	Erp29	ERP29
Esd	Esd	ESD
Etf1	Etf1	ETF1
Etfdh	Etfdh	ETFDH
Ewsr1	Ewsr1	EWSR1
Exdl2	Exd2	EXD2
Exoc1	Exoc1	EXOC1
Exoc2	Exoc2	EXOC2
Exoc3	Exoc3	EXOC3
Exoc4	Exoc4	EXOC4
Exoc5	Exoc5	EXOC5
Exoc6	Exoc6	EXOC6
Exoc7	Exoc7	EXOC7
Exoc8	Exoc8	EXOC8
Extl2	Extl2	EXTL2
Faah	Faah	FAAH
Fabp3	Fabp3	FABP3
Fabp5	Fabp5	FABP5
Fabp7	Fabp7	FABP7
Fahd2a	Fahd2a	FAHD2A
Faim	Faim	FAIM
Farsla	Farsa	FARSA
Farslb	Farsb	FARSB
Fasn	Fasn	FASN
Fbl	Fbl	FBL
Fbn1	Fbn1	FBN1
Fdps	Fdps	FDPS
Fech	Fech	FECH
Fen1	Fen1	FEN1
Fer1l3	Myof	MYOF
Fgfr1op	Fgfr1op	FGFR1OP
Fhod3	Fhod3	FHOD3
Fibp	Fibp	FIBP
Fkbp2	Fkbp2	FKBP2
Fkbp3	Fkbp3	FKBP3
Fkbp4	Fkbp4	FKBP4
Fkbp8	Fkbp8	FKBP8
Flad1	Flad1	FLAD1
Fliih	Flii	FLII
Flna	Flna	FLNA
Flnb	Flnb	FLNB
Flnc	Flnc	FLNC
Fmn2	Fmn2	FMN2
Fmr1	Fmr1	FMR1
Fn1	Fn1	FN1
Frap1	Mtor	MTOR
Fry	Fry	FRY
Fryl	Fryl	FRYL
Fscn1	Fscn1	FSCN1
Ftl1	Ftl1	FTL
Fts	Aktip	AKTIP
Fundc2	Fundc2	FUNDC2
Fus	Fus	FUS
Fusip1	Srsf10	SRSF10
Fv1	Fv1	N/A
Fxr1h	Fxr1	FXR1
Fxr2h	Fxr2	FXR2
Fyco1	Fyco1	FYCO1
Fyn	Fyn	FYN
Ga17	Eif3m	EIF3M
Gabarapl2	Gabarapl2	GABARAPL2
Gabbr1	Gabbr1	GABBR1
Gabrb3	Gabrb3	GABRB3
Gabrg2	Gabrg2	GABRG2
Gad1	Gad1	GAD1
Ganab	Ganab	GANAB
Gapdh	Gapdh	GAPDH
Garnl1	Ralgapa1	RALGAPA1
Gbe1	Gbe1	GBE1
Gbf1	Gbf1	GBF1
Gcc2	Gcc2	GCC2
Gclm	Gclm	GCLM
Gcn1l1	Gcn1l1	GCN1L1
Gcs1	Mogs	MOGS
Gdap1	Gdap1	GDAP1
Gdap1l1	Gdap1l1	GDAP1L1
Gdi1	Gdi1	GDI1
Gdi2	Gdi2	GDI2
Gdpd1	Gdpd1	GDPD1
Gemin5	Gemin5	GEMIN5
Gfap	Gfap	GFAP
Gfer	Gfer	GFER
Ggt1	Ggt1	GGT1
Ghitm	Ghitm	GHITM
Gipc1	Gipc1	GIPC1
Git1	Git1	GIT1
Gkap1	Gkap1	GKAP1
Glg1	Glg1	GLG1
Glmn	Glmn	GLMN
Glo1	Glo1	GLO1
Gls	Gls	GLS
Glul	Glul	GLUL
Gm1553	Gm1553	N/A
Gm1568	Gm1568	N/A
Gm1582	Gm1582	N/A
Gm50	Maneal	MANEAL
Gm88	Lrrc73	LRRC73
Gmfb	Gmfb	GMFB
Gna11	Gna11	GNA11
Gna13	Gna13	GNA13
Gnai2	Gnai2	GNAI2
Gnai3	Gnai3	GNAI3
Gnao1	Gnao1	GNAO1
Gnaq	Gnaq	GNAQ
Gna-rs1	Gnl1	GNL1
Gnas	Gnas	GNAS
Gnat1	Gnat1	GNAT1
Gnat2	Gnat2	GNAT2
Gnat3	Gnat3	GNAT3
Gnaz	Gnaz	GNAZ
Gnb1	Gnb1	GNB1
Gnb2	Gnb2	GNB2
Gnb2l1	Gnb2l1	GNB2L1
Gnb3	Gnb3	GNB3
Gnb4	Gnb4	GNB4
Gnb5	Gnb5	GNB5
Gngt1	Gngt1	GNGT1
Gnpat	Gnpat	GNPAT
Golga2	Golga2	GOLGA2
Golga3	Golga3	GOLGA3
Golga4	Golga4	GOLGA4
Golga5	Golga5	GOLGA5
Golga7	Golga7	GOLGA7
Golgb1	Golgb1	GOLGB1
Gorasp2	Gorasp2	GORASP2
Gosr1	Gosr1	GOSR1
Got1	Got1	GOT1
Gphn	Gphn	GPHN
Gpi1	Gpi1	GPI
Gpiap1	Caprin1	CAPRIN1
Gpm6a	Gpm6a	GPM6A
Gpr98	Gpr98	GPR98
Gprin1	Gprin1	GPRIN1
Gpsm2	Gpsm2	GPSM2
Gpsn2	Tecr	TECR
Gpx4	Gpx4	GPX4
Gramd1b	Gramd1b	GRAMD1B
Grb2	Grb2	GRB2
Grhpr	Grhpr	GRHPR
Gria2	Gria2	GRIA2
Gria3	Gria3	GRIA3
Grip1	Grip1	GRIP1
Grk1	Grk1	GRK1
Gsk3b	Gsk3b	GSK3B
Gsn	Gsn	GSN
Gsta4	Gsta4	N/A
Gstk1	Gstk1	GSTK1
Gstm1	Gstm1	GSTM5
Gstm5	Gstm5	GSTM3
Gstm7	Gstm7	GSTM2
Gstp1	Gstp1	GSTP1
Gstt1	Gstt1	N/A
Gstt2	Gstt2	GSTT2
Gstt3	Gstt3	N/A
Gtf2f2	Gtf2f2	GTF2F2
Gtl3	Gtl3	C16orf80
Gtpbp1	Gtpbp1	GTPBP1
Guca1a	Guca1a	GUCA1A
Guca1b	Guca1b	GUCA1B
Gucy1a3	Gucy1a3	GUCY1A3
Gucy1b3	Gucy1b3	GUCY1B3
Gucy2e	Gucy2e	GUCY2D
Gucy2f	Gucy2f	GUCY2F
Guf1	Guf1	GUF1
Guk1	Guk1	GUK1
Hars	Hars	HARS
Harsl	Hars2	HARS2
Hbld1	Isca2	ISCA2
Hbld2	Isca1	ISCA1
Hcn1	Hcn1	HCN1
Hcn4	Hcn4	HCN4
Hdh	Htt	HTT
Hdhd2	Hdhd2	HDHD2
Hdlbp	Hdlbp	HDLBP
Herc2	Herc2	HERC2
Hexa	Hexa	HEXA
Hibch	Hibch	HIBCH
Hint1	Hint1	HINT1
Hint3	Hint3	HINT3
Hip1r	Hip1r	HIP1R
Hip2	Ube2k	UBE2K
Hirip5	Nfu1	NFU1
Hkdc1	Hkdc1	HKDC1
Hmgb1	Hmgb1	N/A
Hmgb2	Hmgb2	HMGB2
Hmgb3	Hmgb3	N/A
Hmox2	Hmox2	HMOX2
Hnt	Ntm	NTM
Homer1	Homer1	HOMER1
Homer3	Homer3	HOMER3
Hook1	Hook1	HOOK1
Hook3	Hook3	HOOK3
Hpca	Hpca	HPCA
Hpcal1	Hpcal1	HPCAL1
Hpcal4	Hpcal4	HPCAL4
Hprt1	Hprt	HPRT1
Hras1	Hras1	HRAS
Hrsp12	Hrsp12	HRSP12
Hs2st1	Hs2st1	HS2ST1
Hsbp1	Hsbp1	HSBP1
Hsd17b12	Hsd17b12	HSD17B12
Hsdl1	Hsdl1	HSDL1
Hsp90aa1	Hsp90aa1	HSP90AA1
Hsp90ab1	Hsp90ab1	HSP90AB1
Hsp90b1	Hsp90b1	HSP90B1
Hspa12a	Hspa12a	HSPA12A
Hspa1a	Hspa1a	HSPA1A
Hspa1l	Hspa1l	HSPA1L
Hspa2	Hspa2	HSPA2
Hspa4	Hspa4	HSPA4
Hspa4l	Hspa4l	HSPA4L
Hspa5	Hspa5	HSPA5
Hspa8	Hspa8	HSPA8
Hspd1	Hspd1	HSPD1
Huwe1	Huwe1	HUWE1
Hyou1	Hyou1	HYOU1
Iars	Iars	IARS
Ick	Ick	ICK
Icmt	Icmt	ICMT
Idh1	Idh1	IDH1
Idi1	Idi1	IDI1
Ift122	Ift122	IFT122
Ift140	Ift140	IFT140
Ift172	Ift172	IFT172
Ift20	Ift20	IFT20
Ift52	Ift52	IFT52
Ift57	Ift57	IFT57
Ift74	Ift74	IFT74
Ift80	Ift80	IFT80
Ift81	Ift81	IFT81
Ift88	Ift88	IFT88
Igbp1	Igbp1	IGBP1
Ikbkap	Ikbkap	IKBKAP
Ilf2	Ilf2	ILF2
Ilf3	Ilf3	ILF3
Ilvbl	Ilvbl	ILVBL
Impa1	Impa1	IMPA1
Impdh1	Impdh1	IMPDH1
Impdh2	Impdh2	IMPDH2
Impg1	Impg1	IMPG1
Impg2	Impg2	IMPG2
Ina	Ina	INA
Inpp1	Inpp1	INPP1
Ipo7	Ipo7	IPO7
Iqcb1	Iqcb1	IQCB1
Iqgap1	Iqgap1	IQGAP1
Iqgap2	Iqgap2	IQGAP2
Iqsec1	Iqsec1	IQSEC1
Iqsec3	Iqsec3	IQSEC3
Itgav	Itgav	ITGAV
Itgb4bp	Eif6	EIF6
Itpa	Itpa	ITPA
Itsn1	Itsn1	ITSN1
Itsn2	Itsn2	ITSN2
Jtv1	Aimp2	AIMP2
Jup	Jup	JUP
Kars	Kars	KARS
Kcnb1	Kcnb1	KCNB1
Kcnj14	Kcnj14	KCNJ14
Kcnv2	Kcnv2	KCNV2
Kctd8	Kctd8	KCTD8
Kdelr1	Kdelr1	KDELR1
Kif1a	Kif1a	KIF1A
Kif1b	Kif1b	KIF1B
Kif21a	Kif21a	KIF21A
Kif2a	Kif2a	KIF2A
Kif3a	Kif3a	KIF3A
Kif3b	Kif3b	KIF3B
Kif5b	Kif5b	KIF5B
Kif5c	Kif5c	KIF5C
Kifap3	Kifap3	KIFAP3
Klc3	Klc3	KLC3
Kns2	Klc1	KLC1
Kpna2	Kpna2	KPNA2
Kpnb1	Kpnb1	KPNB1
Kras	Kras	KRAS
Ktn1	Ktn1	KTN1
L2hgdh	L2hgdh	L2HGDH
Lancl2	Lancl2	LANCL2
Larp1	Larp1	LARP1
Lars	Lars	LARS
Ldha	Ldha	LDHA
Ldhb	Ldhb	LDHB
Lemd2	Lemd2	LEMD2
Leng4	Mboat7	MBOAT7
Letmd1	Letmd1	LETMD1
Lima1	Lima1	LIMA1
Lin7a	Lin7a	LIN7A
Lin7c	Lin7c	LIN7C
Llgl2	Llgl2	LLGL2
Lman1	Lman1	LMAN1
Lmnb1	Lmnb1	LMNB1
Lmnb2	Lmnb2	LMNB2
Lnp	Lnp	KIAA1715
LOC384589	N/A	N/A
LOC433022	Plcxd2	PLCXD2
LOC546335	N/A	N/A
LOC654470	Tctn1	TCTN1
Lpgat1	Lpgat1	LPGAT1
Lphn3	Lphn3	LPHN3
Lrba	Lrba	LRBA
Lrp1	Lrp1	LRP1
Lrp2	Lrp2	LRP2
Lrrc22	Lrit2	LRIT2
Lrrc45	Lrrc45	LRRC45
Lrrc47	Lrrc47	LRRC47
Lrrc57	Lrrc57	LRRC57
Lrrc59	Lrrc59	LRRC59
Lrrc8a	Lrrc8a	LRRC8A
Lsamp	Lsamp	LSAMP
Lsm14a	Lsm14a	LSM14A
Lsm2	Lsm2	LSM2
Lta4h	Lta4h	LTA4H
Luc7l2	Luc7l2	LUC7L2
Lypla1	Lypla1	LYPLA1
Lypla2	Lypla2	LYPLA2
Lztfl1	Lztfl1	LZTFL1
Macf1	Macf1	MACF1
Madd	Madd	MADD
Magi2	Magi2	MAGI2
Mak	Mak	MAK
Mak10	Naa35	NAA35
Mamdc1	Mdga2	MDGA2
Man1b1	Man1b1	MAN1B1
Man2a2	Man2a2	MAN2A2
Map2k1	Map2k1	MAP2K1
Map2k1ip1	Lamtor3	LAMTOR3
Map2k4	Map2k4	MAP2K4
Mapk1	Mapk1	MAPK1
Mapk3	Mapk3	MAPK3
Mapk8ip3	Mapk8ip3	MAPK8IP3
Mapkap1	Mapkap1	MAPKAP1
Mapre1	Mapre1	MAPRE1
Mapre2	Mapre2	N/A
Mapre3	Mapre3	MAPRE3
Mapt	Mapt	MAPT
March5	March5	MARCH5
Marcks	Marcks	MARCKS
Mars	Mars	MARS
Matr3	Matr3	MATR3
Mbc2	Esyt1	ESYT1
Mdh1	Mdh1	MDH1
Mdm1	Mdm1	MDM1
Mecr	Mecr	MECR
Mesdc2	Mesdc2	MESDC2
Mest	Mest	MEST
Metap2	Metap2	METAP2
Mfge8	Mfge8	MFGE8
Mgea6	Ctage5	CTAGE5
Mgll	Mgll	MGLL
Mgst3	Mgst3	MGST3
Mink1	Mink1	MINK1
Mip	Mip	MIP
Mks1	Mks1	MKS1
Mlf2	Mlf2	MLF2
Mllt4	Mllt4	MLLT4
Mlycd	Mlycd	MLYCD
Mod1	Me1	ME1
Mosc2	Mosc2	MARC2
Mpdu1	Mpdu1	MPDU1
Mpdz	Mpdz	MPDZ
Mpp2	Mpp2	MPP2
Mpp4	Mpp4	MPP4
Mpp5	Mpp5	MPP5
Mpp6	Mpp6	MPP6
Mpst	Mpst	MPST
Mras	Mras	MRAS
Mrs2l	Mrs2	MRS2
Msi1	Msi1	MSI1
Msi2	Msi2	MSI2
Msn	Msn	MSN
Mtap1a	Mtap1a	MAP1A
Mtap1b	Mtap1b	MAP1B
Mtap2	Mtap2	MAP2
Mtap4	Mtap4	MAP4
Mtap6	Mtap6	MAP6
Mtap7	Mtap7	MAP7
Mtap9	Mtap9	MAP9
Mtdh	Mtdh	MTDH
Mthfd1	Mthfd1	MTHFD1
Mthfd1l	Mthfd1l	MTHFD1L
Mtmr1	Mtmr1	MTMR1
Mtx1	Mtx1	MTX1
Mtx2	Mtx2	MTX2
Mulk	Agk	AGK
Mut	Mut	MUT
Mybbp1a	Mybbp1a	MYBBP1A
Myef2	Myef2	MYEF2
Myh10	Myh10	MYH10
Myh11	Myh11	MYH11
Myh14	Myh14	MYH14
Myh9	Myh9	MYH9
Myl6	Myl6	MYL6
Myl9	Myl9	MYL9
Mylc2b	Myl12b	MYL12B
Myo18a	Myo18a	MYO18A
Myo1b	Myo1b	MYO1B
Myo1d	Myo1d	MYO1D
Myo5a	Myo5a	MYO5A
Myo5b	Myo5b	MYO5B
Myo6	Myo6	MYO6
Myo7a	Myo7a	MYO7A
Myo9a	Myo9a	MYO9A
Naca	Naca	NACA
Nap1l1	Nap1l1	NAP1L1
Nap1l4	Nap1l4	NAP1L4
Napa	Napa	NAPA
Napb	Napb	NAPB
Napg	Napg	NAPG
Nbea	Nbea	NBEA
Ncald	Ncald	NCALD
Ncam1	Ncam1	NCAM1
Ncam2	Ncam2	NCAM2
Ncdn	Ncdn	NCDN
Nckap1	Nckap1	NCKAP1
Ncl	Ncl	NCL
Ncln	Ncln	NCLN
Ndrg1	Ndrg1	NDRG1
Ndrg2	Ndrg2	NDRG2
Ndrg3	Ndrg3	NDRG3
Necap1	Necap1	NECAP1
Nedd4	Nedd4	NEDD4
Nef3	Nefm	NEFM
Nefh	Nefh	NEFH
Nefl	Nefl	NEFL
Negr1	Negr1	NEGR1
Neo1	Neo1	NEO1
Nf1	Nf1	NF1
Nfasc	Nfasc	NFASC
Niban	Fam129a	FAM129A
Nif3l1	Nif3l1	NIF3L1
Nipsnap1	Nipsnap1	NIPSNAP1
Nipsnap3a	Nipsnap3b	NIPSNAP3A
Nlgn2	Nlgn2	NLGN2
Nlgn3	Nlgn3	NLGN3
Nme1	Nme1	NME1
Nme2	Nme2	NME2
Nme3	Nme3	NME3
Nme7	Nme7	NME7
Nmnat3	Nmnat3	N/A
Nmt1	Nmt1	NMT1
Nol5	Nop58	NOP58
Nol5a	Nop56	NOP56
Nola1	Gar1	GAR1
Nomo1	Nomo1	NOMO1
Nono	Nono	NONO
Npepps	Npepps	NPEPPS
Nphp1	Nphp1	NPHP1
Nphp4	Nphp4	NPHP4
Nploc4	Nploc4	NPLOC4
Npm1	Npm1	NPM1
Nptn	Nptn	NPTN
Nras	Nras	NRAS
Nrxn3	Nrxn3	NRXN3
Nsf	Nsf	NSF
Nsfl1c	Nsfl1c	NSFL1C
Nt5c	Nt5c	NT5C
Nt5c3	Nt5c3	NT5C3
Nt5dc2	Nt5dc2	NT5DC2
Nt5e	Nt5e	NT5E
Nubpl	Nubpl	NUBPL
Nucb1	Nucb1	NUCB1
Nudc	Nudc	NUDC
Nudt2	Nudt2	NUDT2
Nudt21	Nudt21	NUDT21
Nufip2	Nufip2	NUFIP2
Ociad1	Ociad1	OCIAD1
Ociad2	Ociad2	OCIAD2
Odf2	Odf2	ODF2
Odz4	Tenm4	TENM4
Ofd1	Ofd1	OFD1
Ogt	Ogt	OGT
Opn1mw	Opn1mw	OPN1LW
Opn1sw	Opn1sw	OPN1SW
Optn	Optn	OPTN
ORF19	Wash	WASH1
ORF28	Dnajc28	DNAJC28
ORF34	Fam120c	FAM120C
Ormdl1	Ormdl1	ORMDL1
Osbp	Osbp	OSBP
Osbpl8	Osbpl8	OSBPL8
Otub1	Otub1	OTUB1
Oxr1	Oxr1	OXR1
P140	Srcin1	SRCIN1
P4ha1	P4ha1	P4HA1
P4hb	P4hb	P4HB
Pa2g4	Pa2g4	PA2G4
Pabpc1	Pabpc1	PABPC1
Pabpc2	Pabpc2	N/A
Pabpc4	Pabpc4	PABPC4
Pacs1	Pacs1	PACS1
Pacsin1	Pacsin1	PACSIN1
Pacsin2	Pacsin2	PACSIN2
Pacsin3	Pacsin3	PACSIN3
Padi2	Padi2	PADI2
Pafah1b1	Pafah1b1	PAFAH1B1
Pafah1b2	Pafah1b2	PAFAH1B2
Pafah1b3	Pafah1b3	PAFAH1B3
Paics	Paics	PAICS
Pak2	Pak2	PAK2
Palm	Palm	PALM
Pank4	Pank4	PANK4
Papd1	Mtpap	MTPAP
Park7	Park7	PARK7
Parl	Parl	PARL
Pawr	Pawr	PAWR
Pcca	Pcca	PCCA
Pcdh15	Pcdh15	PCDH15
Pcdh21	Cdhr1	CDHR1
Pclo	Pclo	PCLO
Pcm1	Pcm1	PCM1
Pcmt1	Pcmt1	PCMT1
Pcmtd2	Pcmtd2	PCMTD2
Pcnt	Pcnt	PCNT
Pcyox1	Pcyox1	PCYOX1
Pdap1	Pdap1	PDAP1
Pdc	Pdc	PDC
Pdcd10	Pdcd10	PDCD10
Pdcd6	Pdcd6	PDCD6
Pdcd6ip	Pdcd6ip	PDCD6IP
Pddc1	Pddc1	PDDC1
Pde6a	Pde6a	PDE6A
Pde6b	Pde6b	PDE6B
Pde6c	Pde6c	PDE6C
Pde6d	Pde6d	PDE6D
Pde8a	Pde8a	PDE8A
Pde8b	Pde8b	PDE8B
Pdia3	Pdia3	PDIA3
Pdia4	Pdia4	PDIA4
Pdia6	Pdia6	PDIA6
Pdk3	Pdk3	PDK3
Pdxk	Pdxk	PDXK
Pdxp	Pdxp	PDXP
Pdzd11	Pdzd11	PDZD11
Pea15	Pea15a	PEA15
Pebp1	Pebp1	PEBP1
Peci	Eci2	ECI2
Pex1	Pex1	PEX1
Pex11b	Pex11b	PEX11B
Pex2	Pex5l	PEX5L
Pfkfb2	Pfkfb2	PFKFB2
Pfkl	Pfkl	PFKL
Pfkm	Pfkm	PFKM
Pfkp	Pfkp	PFKP
Pfn1	Pfn1	PFN1
Pfn2	Pfn2	PFN2
Pgam1	Pgam1	PGAM1
Pgam5	Pgam5	PGAM5
Pgd	Pgd	PGD
Pgk1	Pgk1	PGK1
Pgls	Pgls	PGLS
Pgm2	Pgm2	PGM1
Pgm2l1	Pgm2l1	PGM2L1
Pgrmc1	Pgrmc1	PGRMC1
Pgrmc2	Pgrmc2	PGRMC2
Phb	Phb	PHB
Phb2	Phb2	PHB2
Phgdh	Phgdh	PHGDH
Phpt1	Phpt1	PHPT1
Picalm	Picalm	PICALM
Pigg	Pigg	PIGG
Pigs	Pigs	PIGS
Pik3c3	Pik3c3	PIK3C3
Pik3r4	Pik3r4	PIK3R4
Pik4ca	Pi4ka	PI4KA
Pin1	Pin1	PIN1
Pip	Pip	PIP
Pitpna	Pitpna	PITPNA
Pitpnb	Pitpnb	PITPNB
Pitpnm1	Pitpnm1	PITPNM1
Pitpnm2	Pitpnm2	PITPNM2
Pkm2	Pkm	PKM
Pkp2	Pkp2	PKP2
Pkp4	Pkp4	PKP4
Plcb4	Plcb4	PLCB4
Plec1	Plec	PLEC
Plekha6	Plekha6	PLEKHA6
Plekha7	Plekha7	PLEKHA7
Plekhb1	Plekhb1	PLEKHB1
Plekhb2	Plekhb2	PLEKHB2
Pls3	Pls3	PLS3
Pltp	Pltp	PLTP
Plxna1	Plxna1	PLXNA1
Plxnb2	Plxnb2	PLXNB2
Pmm2	Pmm2	PMM2
Pnpla6	Pnpla6	PNPLA6
Pnpla8	Pnpla8	PNPLA8
Pnpt1	Pnpt1	PNPT1
Podxl	Podxl	PODXL
Pon1	Pon1	PON1
Pon2	Pon2	PON2
Por	Por	POR
Ppa1	Ppa1	PPA1
Ppef2	Ppef2	PPEF2
Ppfia1	Ppfia1	PPFIA1
Ppfia2	Ppfia2	PPFIA2
Ppia	Ppia	PPIA
Ppib	Ppib	PPIB
Ppid	Ppid	PPID
Ppme1	Ppme1	PPME1
Ppp1ca	Ppp1ca	PPP1CA
Ppp1cb	Ppp1cb	PPP1CB
Ppp1cc	Ppp1cc	PPP1CC
Ppp1r12a	Ppp1r12a	PPP1R12A
Ppp1r7	Ppp1r7	PPP1R7
Ppp1r9a	Ppp1r9a	PPP1R9A
Ppp1r9b	Ppp1r9b	PPP1R9B
Ppp2ca	Ppp2ca	PPP2CA
Ppp2r1a	Ppp2r1a	PPP2R1A
Ppp2r4	Ppp2r4	PPP2R4
Ppp2r5d	Ppp2r5d	PPP2R5D
Ppp2r5e	Ppp2r5e	PPP2R5E
Ppp3ca	Ppp3ca	PPP3CA
Ppp3cb	Ppp3cb	PPP3CB
Ppp3cc	Ppp3cc	PPP3CC
Ppp3r1	Ppp3r1	PPP3R1
Ppp5c	Ppp5c	PPP5C
Prcc1	Prrc1	PRRC1
Prdx1	Prdx1	PRDX1
Prdx2	Prdx2	PRDX2
Prdx3	Prdx3	PRDX3
Prdx4	Prdx4	PRDX4
Prdx5	Prdx5	PRDX5
Prdx6	Prdx6	PRDX6
Preb	Preb	PREB
Prei3	Mob4	MOB4
Prep	Prep	PREP
Prkaa1	Prkaa1	PRKAA1
Prkaca	Prkaca	PRKACA
Prkacb	Prkacb	PRKACB
Prkag1	Prkag1	PRKAG1
Prkar1a	Prkar1a	PRKAR1A
Prkar2a	Prkar2a	PRKAR2A
Prkar2b	Prkar2b	PRKAR2B
Prkca	Prkca	PRKCA
Prkcsh	Prkcsh	PRKCSH
Prkra	Prkra	PRKRA
Prnp	Prnp	PRNP
Prom1	Prom1	PROM1
Prpf19	Prpf19	PRPF19
Prpf8	Prpf8	PRPF8
Prps1	Prps1	PRPS1
Prps2	Prps2	PRPS2
Prpsap1	Prpsap1	PRPSAP1
Prpsap2	Prpsap2	PRPSAP2
Prune	Prune	PRUNE
Psap	Psap	PSAP
Psat1	Psat1	PSAT1
Psd	Psd	PSD
Psma1	Psma1	PSMA1
Psma2	Psma2	PSMA2
Psma3	Psma3	PSMA3
Psma4	Psma4	PSMA4
Psma5	Psma5	PSMA5
Psma6	Psma6	PSMA6
Psma7	Psma7	PSMA7
Psmb1	Psmb1	PSMB1
Psmb2	Psmb2	PSMB2
Psmb3	Psmb3	PSMB3
Psmb4	Psmb4	PSMB4
Psmb5	Psmb5	PSMB5
Psmc1	Psmc1	PSMC1
Psmc2	Psmc2	PSMC2
Psmc5	Psmc5	PSMC5
Psmc6	Psmc6	PSMC6
Psmd1	Psmd1	PSMD1
Psmd11	Psmd11	PSMD11
Psmd12	Psmd12	PSMD12
Psmd13	Psmd13	PSMD13
Psmd2	Psmd2	PSMD2
Psmd3	Psmd3	PSMD3
Psmd5	Psmd5	PSMD5
Psmd6	Psmd6	PSMD6
Psmd7	Psmd7	PSMD7
Psme1	Psme1	PSME1
Psph	Psph	PSPH
Ptbp1	Ptbp1	PTBP1
Ptges2	Ptges2	PTGES2
Ptges3	Ptges3	PTGES3
Ptp4a1	Ptp4a1	PTP4A1
Ptp4a2	Ptp4a2	PTP4A2
Ptp4a3	Ptp4a3	PTP4A3
Ptplad1	Ptplad1	PTPLAD1
Ptpn23	Ptpn23	PTPN23
Ptpra	Ptpra	PTPRA
Ptprd	Ptprd	PTPRD
Ptrh2	Ptrh2	PTRH2
Pura	Pura	PURA
Purb	Purb	PURB
Purg	Purg	PURG
Pycr2	Pycr2	PYCR2
Pygb	Pygb	PYGB
Pygm	Pygm	PYGM
Qars	Qars	QARS
Qdpr	Qdpr	QDPR
Rab1	Rab1	RAB1A
Rab10	Rab10	RAB10
Rab11a	Rab11a	RAB11A
Rab11b	Rab11b	RAB11B
Rab14	Rab14	RAB14
Rab18	Rab18	RAB18
Rab1b	Rab1b	RAB1B
Rab2	Rab2a	RAB2A
Rab21	Rab21	RAB21
Rab22a	Rab22a	RAB22A
Rab23	Rab23	RAB23
Rab24	Rab24	RAB24
Rab28	Rab28	RAB28
Rab2b	Rab2b	RAB2B
Rab30	Rab30	RAB30
Rab35	Rab35	RAB35
Rab39b	Rab39b	RAB39B
Rab3a	Rab3a	RAB3A
Rab3c	Rab3c	RAB3C
Rab3gap1	Rab3gap1	RAB3GAP1
Rab3gap2	Rab3gap2	RAB3GAP2
Rab4b	Rab4b	RAB4B
Rab5a	Rab5a	RAB5A
Rab5b	Rab5b	RAB5B
Rab5c	Rab5c	RAB5C
Rab6	Rab6a	RAB6A
Rab6b	Rab6b	RAB6B
Rab7	Rab7	RAB7A
Rab8a	Rab8a	RAB8A
Rab8b	Rab8b	RAB8B
Rab9	Rab9	RAB9A
Rabl2a	Rabl2	RABL2A
Rabl3	Rabl3	RABL3
Rabl4	Ift27	IFT27
Rabl5	Rabl5	RABL5
Rac1	Rac1	RAC1
Rala	Rala	RALA
Ralb	Ralb	RALB
Ran	Ran	RAN
Ranbp5	Ipo5	IPO5
Rap1a	Rap1a	RAP1A
Rap1b	Rap1b	RAP1B
Rap1gds1	Rap1gds1	RAP1GDS1
Rap2a	Rap2a	RAP2A
Rap2ip	Rundc3a	RUNDC3A
Rapgef2	Rapgef2	RAPGEF2
Rapgef4	Rapgef4	RAPGEF4
Raph1	Raph1	RAPH1
Rars	Rars	RARS
Rarsl	Rars2	RARS2
Rasgrf2	Rasgrf2	RASGRF2
Rbbp9	Rbbp9	RBBP9
Rbm14	Rbm14	RBM14
Rbm39	Rbm39	RBM39
Rbmx	Rbmx	RBMX
Rbp1	Rbp1	RBP1
Rbp3	Rbp3	RBP3
Rcn2	Rcn2	RCN2
Rcvrn	Rcvrn	RCVRN
Rdh11	Rdh11	RDH11
Rdh12	Rdh12	RDH12
Rdh14	Rdh14	RDH14
Rdh5	Rdh5	RDH5
Rdh8	Rdh8	RDH8
Rds	Prph2	PRPH2
Rdx	Rdx	RDX
Reep5	Reep5	REEP5
Reep6	Reep6	REEP6
Refbp2	Alyref2	N/A
Rgs6	Rgs6	RGS6
Rgs7	Rgs7	RGS7
Rgs9	Rgs9	RGS9
Rgs9bp	Rgs9bp	RGS9BP
Rheb	Rheb	RHEB
Rho	Rho	RHO
Rhoa	Rhoa	RHOA
Rhog	Rhog	RHOG
Rhot1	Rhot1	RHOT1
Rhot2	Rhot2	RHOT2
Rhpn1	Rhpn1	RHPN1
Rims1	Rims1	RIMS1
Rims2	Rims2	RIMS2
Rlbp1	Rlbp1	RLBP1
Rnf14	Rnf14	RNF14
Rnf40	Rnf40	RNF40
Rnh1	Rnh1	RNH1
Rock2	Rock2	ROCK2
Rogdi	Rogdi	ROGDI
Rom1	Rom1	ROM1
Rp1h	Rp1	RP1
Rp1hl1	Rp1l1	RP1L1
RP23-336J1.4	G3bp1	G3BP1
Rpgr	Rpgr	RPGR
Rpgrip1	Rpgrip1	RPGRIP1
Rph3a	Rph3a	RPH3A
Rpn1	Rpn1	RPN1
Rpn2	Rpn2	RPN2
Rprc1	Mtap7d1	MAP7D1
Rqcd1	Rqcd1	RQCD1
Rras	Rras	RRAS
Rrbp1	Rrbp1	RRBP1
Rs1h	Rs1	RS1
Rsl1d1	Rsl1d1	RSL1D1
Rsn	Clip1	CLIP1
Rtcd1	Rtcd1	RTCA
Rtn1	Rtn1	RTN1
Rtn3	Rtn3	RTN3
Rtn4	Rtn4	RTN4
Rufy3	Rufy3	RUFY3
Ruvbl1	Ruvbl1	RUVBL1
Ruvbl2	Ruvbl2	RUVBL2
Ryr2	Ryr2	RYR2
Sacm1l	Sacm1l	SACM1L
Sag	Sag	SAG
Samm50	Samm50	SAMM50
Saps3	Ppp6r3	PPP6R3
Sar1a	Sar1a	SAR1A
Sar1b	Sar1b	SAR1B
Sars	Sars	SARS
Sbds	Sbds	SBDS
Sbf1	Sbf1	SBF1
Scamp1	Scamp1	SCAMP1
Sccpdh	Sccpdh	SCCPDH
Scfd1	Scfd1	SCFD1
Scfd2	Scfd2	SCFD2
Scgn	Scgn	SCGN
Scrib	Scrib	SCRIB
Scrn1	Scrn1	SCRN1
Scye1	Aimp1	AIMP1
Scyl1	Scyl1	SCYL1
Sdf2	Sdf2	SDF2
Sdhb	Sdhb	SDHB
Sec11l1	Sec11a	SEC11A
Sec11l3	Sec11c	SEC11C
Sec15l2	Exoc6b	EXOC6B
Sec22b	Sec22b	SEC22B
Sec23a	Sec23a	SEC23A
Sec23b	Sec23b	SEC23B
Sec23ip	Sec23ip	SEC23IP
Sec24b	Sec24b	SEC24B
Sec24c	Sec24c	SEC24C
Sec31l1	Sec31a	SEC31A
Sec61a1	Sec61a1	SEC61A1
Sec61a2	Sec61a2	SEC61A2
Sec63	Sec63	SEC63
Selenbp1	Selenbp1	SELENBP1
Sept11	Sept11	SEPT11
Sept2	Sept2	SEPT2
Sept3	Sept3	SEPT3
Sept4	Sept4	SEPT4
Sept5	Sept5	SEPT5
Sept6	Sept6	SEPT6
Sept7	Sept7	SEPT7
Sept8	Sept8	SEPT8
Sept9	Sept9	SEPT9
Serbp1	Serbp1	SERBP1
Serpinh1	Serpinh1	SERPINH1
Sf3a1	Sf3a1	SF3A1
Sf3b2	Sf3b2	SF3B2
Sf3b3	Sf3b3	SF3B3
Sfpq	Sfpq	SFPQ
Sfrs2	Srsf2	SRSF2
Sfrs3	Srsf3	SRSF3
Sfrs7	Srsf7	SRSF7
Sgip1	Sgip1	SGIP1
Sh3bgrl	Sh3bgrl	SH3BGRL
Sh3bgrl2	Sh3bgrl2	SH3BGRL2
Sh3gl2	Sh3gl2	SH3GL2
Shoc2	Shoc2	SHOC2
Si	Pmel	PMEL
Sirpa	Sirpa	SIRPA
Sirt2	Sirt2	SIRT2
Skiv2l	Skiv2l	SKIV2L
Skiv2l2	Skiv2l2	SKIV2L2
Skp1a	Skp1a	SKP1
Slc12a2	Slc12a2	SLC12A2
Slc12a5	Slc12a5	SLC12A5
Slc16a1	Slc16a1	SLC16A1
Slc1a2	Slc1a2	SLC1A2
Slc1a3	Slc1a3	SLC1A3
Slc24a1	Slc24a1	SLC24A1
Slc25a35	Slc25a35	SLC25A35
Slc27a1	Slc27a1	SLC27A1
Slc27a4	Slc27a4	SLC27A4
Slc2a1	Slc2a1	SLC2A1
Slc30a9	Slc30a9	SLC30A9
Slc32a1	Slc32a1	SLC32A1
Slc39a7	Slc39a7	SLC39A7
Slc3a2	Slc3a2	SLC3A2
Slc4a1	Slc4a1	SLC4A1
Slc4a10	Slc4a10	SLC4A10
Slc4a7	Slc4a7	SLC4A7
Slc4a8	Slc4a8	SLC4A8
Slc6a1	Slc6a1	SLC6A1
Slc6a11	Slc6a11	SLC6A11
Slc6a9	Slc6a9	SLC6A9
Slc9a3r1	Slc9a3r1	SLC9A3R1
Slk	Slk	SLK
Slmap	Slmap	SLMAP
Smc1a	Smc1a	SMC1A
Smc3	Smc3	SMC3
Smg6	Smg6	SMG6
Snap23	Snap23	SNAP23
Snap25	Snap25	SNAP25
Snap91	Snap91	SNAP91
Snca	Snca	SNCA
Sncb	Sncb	SNCB
Sncg	Sncg	SNCG
Sntb1	Sntb1	SNTB1
Sntb2	Sntb2	SNTB2
Snx1	Snx1	SNX1
Snx12	Snx12	SNX12
Snx2	Snx2	SNX2
Snx27	Snx27	SNX27
Snx3	Snx3	SNX3
Sod1	Sod1	SOD1
Sorbs2	Sorbs2	SORBS2
Sorcs2	Sorcs2	SORCS2
Spata5	Spata5	SPATA5
Spata7	Spata7	SPATA7
Spcs2	Spcs2	SPCS2
Spfh1	Erlin1	ERLIN1
Spfh2	Erlin2	ERLIN2
Spna1	Spna1	SPTA1
Spna2	Spna2	SPTAN1
Spnb1	Spnb1	SPTB
Spnb2	Spnb2	SPTBN1
Spnb3	Spnb3	SPTBN2
Spnb4	Spnb4	SPTBN4
Spr	Spr	SPR
Src	Src	SRC
Srgap3	Srgap3	SRGAP3
Srp14	Srp14	SRP14
Srp19	Srp19	SRP19
Srp54	Srp54a	SRP54
Srp68	Srp68	SRP68
Srp72	Srp72	SRP72
Srpk1	Srpk1	SRPK1
Srpr	Srpr	SRPR
Srprb	Srprb	SRPRB
Ssb	Ssb	SSB
Ssr1	Ssr1	SSR1
Ssr4	Ssr4	SSR4
Ssrp1	Ssrp1	SSRP1
Sssca1	Sssca1	SSSCA1
St13	St13	ST13
Stam	Stam	STAM
Stat3	Stat3	STAT3
Statip1	Elp2	ELP2
Stau1	Stau1	STAU1
Stim1	Stim1	STIM1
Stip1	Stip1	STIP1
Stk25	Stk25	STK25
Stk39	Stk39	STK39
Stom	Stom	STOM
Stoml2	Stoml2	STOML2
Strn3	Strn3	STRN3
Strn4	Strn4	STRN4
Stt3a	Stt3a	STT3A
Stt3b	Stt3b	STT3B
Stx12	Stx12	STX12
Stx16	Stx16	STX16
Stx1a	Stx1a	STX1A
Stx1b2	Stx1b	STX1B
Stx3	Stx3	STX3
Stx6	Stx6	STX6
Stx7	Stx7	STX7
Stx8	Stx8	STX8
Stxbp1	Stxbp1	STXBP1
Stxbp2	Stxbp2	STXBP2
Stxbp5	Stxbp5	STXBP5
Sub1	Sub1	SUB1
Sv2a	Sv2a	SV2A
Sv2b	Sv2b	SV2B
Syn1	Syn1	SYN1
Syn2	Syn2	SYN2
Syncrip	Syncrip	SYNCRIP
Syne1	Syne1	SYNE1
Syne2	Syne2	SYNE2
Synj1	Synj1	SYNJ1
Synpo2	Synpo2	SYNPO2
Syp	Syp	SYP
Syt1	Syt1	SYT1
Tagln3	Tagln3	TAGLN3
Taldo1	Taldo1	TALDO1
Taok1	Taok1	TAOK1
Taok3	Taok3	TAOK3
Tardbp	Tardbp	TARDBP
Tars	Tars	TARS
Tarsl2	Tarsl2	TARSL2
Tbcc	Tbcc	TBCC
Tbk1	Tbk1	TBK1
Tbl2	Tbl2	TBL2
Tceb1	Tceb1	TCEB1
Tceb2	Tceb2	TCEB2
Tcp1	Tcp1	TCP1
Tdrd7	Tdrd7	TDRD7
Tdrkh	Tdrkh	TDRKH
Tfg	Tfg	TFG
Tgfbrap1	Tgfbrap1	TGFBRAP1
Tgm2	Tgm2	TGM2
Thbs1	Thbs1	THBS1
Them4	Them4	THEM4
Thoc4	Alyref	ALYREF
Thop1	Thop1	THOP1
Thy1	Thy1	THY1
Tjp1	Tjp1	TJP1
Tjp2	Tjp2	TJP2
Tkt	Tkt	TKT
Tln1	Tln1	TLN1
Tln2	Tln2	TLN2
Tloc1	Sec62	SEC62
Tm9sf2	Tm9sf2	TM9SF2
Tmcc2	Tmcc2	TMCC2
Tmed10	Tmed10	TMED10
Tmed2	Tmed2	TMED2
Tmed3	Tmed3	TMED3
Tmed4	Tmed4	TMED4
Tmed7	Tmed7	TMED7
Tmed9	Tmed9	TMED9
Tmem1	Trappc10	TRAPPC10
Tmem11	Tmem11	TMEM11
Tmem111	Emc3	EMC3
Tmem126a	Tmem126a	TMEM126A
Tmem143	Tmem143	TMEM143
Tmem16b	Ano2	ANO2
Tmem2	Tmem2	TMEM2
Tmem24	C2cd2l	C2CD2L
Tmem27	Tmem27	TMEM27
Tmem30a	Tmem30a	TMEM30A
Tmem32	Mmgt1	MMGT1
Tmem33	Tmem33	TMEM33
Tmem4	Cnpy2	CNPY2
Tmem63b	Tmem63b	TMEM63B
Tmem65	Tmem65	TMEM65
Tmem67	Tmem67	TMEM67
Tmlhe	Tmlhe	TMLHE
Tmod1	Tmod1	TMOD1
Tmod2	Tmod2	TMOD2
Tmod3	Tmod3	TMOD3
Tmpo	Tmpo	TMPO
Tnfaip3	Tnfaip3	TNFAIP3
Tnik	Tnik	TNIK
Tnks1bp1	Tnks1bp1	TNKS1BP1
Tnpo1	Tnpo1	TNPO1
Tnr	Tnr	TNR
Tnrc15	Gigyf2	GIGYF2
Tnrc5	Cnpy3	CNPY3
Tollip	Tollip	TOLLIP
Tom1	Tom1	TOM1
Tom1l2	Tom1l2	TOM1L2
Tpd52	Tpd52	TPD52
Tpd52l2	Tpd52l2	TPD52L2
Tpi1	Tpi1	TPI1
Tpm1	Tpm1	TPM1
Tpm3	Tpm3	TPM3
Tpm4	Tpm4	TPM4
Tpmt	Tpmt	TPMT
Tpp2	Tpp2	TPP2
Traf3ip1	Traf3ip1	TRAF3IP1
Trafd1	Trafd1	TRAFD1
Trap1	Trap1	TRAP1
Trappc1	Trappc1	TRAPPC1
Trappc3	Trappc3	TRAPPC3
Trappc4	Trappc4	TRAPPC4
Trappc5	Trappc5	TRAPPC5
Trim2	Trim2	TRIM2
Trim25	Trim25	TRIM25
Trim28	Trim28	TRIM28
Trim3	Trim3	TRIM3
Trp53bp2	Trp53bp2	TP53BP2
Trpm1	Trpm1	TRPM1
Tsg101	Tsg101	TSG101
Tsga14	Tsga14	CEP41
Tsn	Tsn	TSN
Tsnax	Tsnax	TSNAX
Tssc1	Tssc1	TSSC1
Ttc21b	Ttc21b	TTC21B
Ttc26	Ttc26	TTC26
Ttc7b	Ttc7b	TTC7B
Ttc8	Ttc8	TTC8
Ttc9c	Ttc9c	TTC9C
Ttyh1	Ttyh1	TTYH1
Tub	Tub	TUB
Tuba1	Tuba1a	TUBA1A
Tuba4	Tuba4a	TUBA4A
Tubal3	Tubal3	TUBAL3
Tubb2a	Tubb2a	TUBB2A
Tubb2b	Tubb2b	TUBB2B
Tubb2c	Tubb4b	TUBB4B
Tubb3	Tubb3	TUBB3
Tubb4	Tubb4a	TUBB4A
Tubb5	Tubb5	TUBB
Tubg2	Tubg2	TUBG2
Tubgcp2	Tubgcp2	TUBGCP2
Tubgcp3	Tubgcp3	TUBGCP3
Tulp1	Tulp1	TULP1
Tusc3	Tusc3	TUSC3
Txn1	Txn1	TXN
Txndc1	Tmx1	TMX1
Txndc12	Txndc12	TXNDC12
Txndc14	Tmx2	TMX2
Txndc4	Erp44	ERP44
Txndc5	Txndc5	TXNDC5
Txnl2	Glrx3	GLRX3
Txnl6	Nxnl1	NXNL1
Uba52	Uba52	UBA52
Ubap2l	Ubap2l	UBAP2L
Ubb	Ubb	N/A
Ube1x	Uba1	UBA1
Ube2l3	Ube2l3	UBE2L3
Ube2m	Ube2m	UBE2M
Ube2n	Ube2n	UBE2N
Ube2v1	Ube2v1	UBE2V1
Ube3b	Ube3b	UBE3B
Ube4a	Ube4a	UBE4A
Ubl3	Ubl3	UBL3
Ubp1	Ubp1	UBP1
Ubxd2	Ubxn4	UBXN4
Ubxd8	Faf2	FAF2
Uchl1	Uchl1	UCHL1
Uchl3	Uchl3	UCHL3
Uckl1	Uckl1	UCKL1
Ugcgl1	Uggt1	UGGT1
Ugp2	Ugp2	UGP2
Unc119	Unc119	UNC119
Unc13a	Unc13a	UNC13A
Unc13b	Unc13b	UNC13B
Upf1	Upf1	UPF1
Upf2	Upf2	UPF2
Upf3b	Upf3b	UPF3B
Ush2a	Ush2a	USH2A
Usp10	Usp10	USP10
Usp30	Usp30	USP30
Usp39	Usp39	USP39
Usp46	Usp46	USP46
Usp5	Usp5	USP5
Usp7	Usp7	USP7
Usp9x	Usp9x	USP9X
Utrn	Utrn	UTRN
Vac14	Vac14	VAC14
Vamp2	Vamp2	VAMP2
Vamp3	Vamp3	VAMP3
Vamp4	Vamp4	VAMP4
Vamp8	Vamp8	VAMP8
Vapa	Vapa	VAPA
Vapb	Vapb	VAPB
Vars2	Vars	VARS
Vat1	Vat1	VAT1
Vbp1	Vbp1	VBP1
Vcl	Vcl	VCL
Vcp	Vcp	VCP
Vcpip1	Vcpip1	VCPIP1
Vdp	Uso1	USO1
Vil2	Ezr	EZR
Vim	Vim	VIM
Vit	Vit	VIT
Vps11	Vps11	VPS11
Vps13c	Vps13c	VPS13C
Vps13d	Vps13d	VPS13D
Vps16	Vps16	VPS16
Vps18	Vps18	VPS18
Vps25	Vps25	VPS25
Vps26a	Vps26a	VPS26A
Vps26b	Vps26b	VPS26B
Vps28	Vps28	VPS28
Vps29	Vps29	VPS29
Vps33a	Vps33a	VPS33A
Vps33b	Vps33b	VPS33B
Vps35	Vps35	VPS35
Vps39	Vps39	VPS39
Vps45	Vps45	VPS45
Vps4a	Vps4a	VPS4A
Vps52	Vps52	VPS52
Vps53	Vps53	VPS53
Vsnl1	Vsnl1	VSNL1
Vti1a	Vti1a	VTI1A
Vtn	Vtn	VTN
Wars	Wars	WARS
Wasf1	Wasf1	WASF1
Wasf3	Wasf3	WASF3
Wbscr1	Eif4h	EIF4H
Wdfy3	Wdfy3	WDFY3
Wdr1	Wdr1	WDR1
Wdr17	Wdr17	WDR17
Wdr19	Wdr19	WDR19
Wdr34	Wdr34	WDR34
Wdr35	Wdr35	WDR35
Wdr37	Wdr37	WDR37
Wdr47	Wdr47	WDR47
Wdr48	Wdr48	WDR48
Wdr51a	Poc1a	POC1A
Wdr6	Wdr6	WDR6
Wdr7	Wdr7	WDR7
Wfs1	Wfs1	WFS1
Xpo1	Xpo1	XPO1
Xpo5	Xpo5	XPO5
Yars	Yars	YARS
Ybx1	Ybx1	YBX1
Ykt6	Ykt6	YKT6
Ythdf1	Ythdf1	YTHDF1
Ythdf3	Ythdf3	YTHDF3
Ywhab	Ywhab	YWHAB
Ywhae	Ywhae	YWHAE
Ywhag	Ywhag	YWHAG
Ywhah	Ywhah	YWHAH
Ywhaq	Ywhaq	YWHAQ
Ywhaz	Ywhaz	YWHAZ
Zadh1	Ptgr2	PTGR2
Zc3h7b	Zc3h7b	ZC3H7B
Zcd1	Cisd1	CISD1
Zdhhc17	Zdhhc17	ZDHHC17
Zdhhc5	Zdhhc5	ZDHHC5
Zfp289	Arfgap2	ARFGAP2
Zfp291	Scaper	SCAPER
Zfp294	Ltn1	LTN1
Zfp365	Zfp365	ZNF365
Zubr1	Ubr4	UBR4

## Sheet: S4
Table S4: Functional analysis of newly identified OS proteins
C: number of reference genes (human genome) in the category
O: number of genes in the gene set and also in the category
E: expected number in the category
R: Ratio of enrichment
rawP: p value from hypergeometric test
adjP: p value adjusted by the multiple test adjustment
biological process	cellular respiration	C=159;O=81;E=16.41;R=4.94;rawP=2.80e-38;adjP=1.00e-34
gene:	NDUFA5, NDUFC2, NDUFB6, SUCLG1, UQCRB, UQCR10, SLC25A13, NDUFB5, SOD2, IDH2, NDUFAB1, NDUFA13, NDUFB11, ATP5J, SDHA, BLOC1S1, NDUFB3, UQCRFS1, UQCRC2, ETFA, NDUFB8, SUCLG2, NDUFV3, NDUFB9, NDUFA6, NDUFA10, DLD, FXN, NDUFS2, NDUFA9, COX7C, COQ7, UQCRQ, IDH3A, FH, ACO1, NDUFA7, OGDH, PDHB, MAT2A, ATP5D, ATP5F1, ALDH5A1, NDUFA11, NDUFA1, NDUFS3, COX5A, UQCRH, NDUFB7, NDUFA8, COX6B1, SDHC, MECP2, NDU…
biological process	respiratory electron transport chain	C=110;O=62;E=11.35;R=5.46;rawP=6.57e-33;adjP=1.18e-29
gene:	NDUFA5, NDUFC2, NDUFB6, UQCRB, SDHC, UQCR10, MECP2, SLC25A13, NDUFS6, NDUFB5, SOD2, NDUFA4, NDUFAB1, COX6C, NDUFA13, NDUFB11, ATP5J, SDHA, ETFB, NDUFS7, NDUFS4, NDUFB3, UQCRFS1, NDUFV1, NDUFA2, NDUFB4, COX6A1, NDUFB2, UQCRC2, ETFA, NDUFB8, NDUFV3, NDUFB9, NDUFS8, UQCR11, NDUFA6, NDUFA10, DLD, NDUFA12, NDUFA3, NDUFS2, NDUFA9, ATP5L, COX7C, COQ7, UQCRQ, NDUFA7, ATP5J2, NDUFB10, ATP5D, ATP5F1, ALDH5…
biological process	electron transport chain	C=148;O=70;E=15.28;R=4.58;rawP=1.32e-30;adjP=1.58e-27
gene:	NDUFA5, NDUFC2, NDUFB6, UQCRB, UQCR10, SLC25A13, TMX4, NDUFB5, SOD2, NDUFAB1, NDUFA13, NDUFB11, ATP5J, SDHA, FDX1, NDUFB3, UQCRFS1, UQCRC2, ETFA, NDUFB8, NDUFV3, NDUFB9, NDUFA6, NDUFA10, DLD, NDUFS2, NDUFA9, COX7C, COQ7, UQCRQ, NDUFA7, ATP5D, ATP5F1, ALDH5A1, FDX1L, NDUFA11, NDUFA1, NDUFS3, COX5A, UQCRH, NDUFB7, NDUFA8, TXN2, COX6B1, SDHC, MECP2, NDUFS6, NDUFA4, COX6C, NDUFS7, ETFB, NDUFS4, NDUFV…
biological process	oxidation-reduction process	C=558;O=150;E=57.59;R=2.60;rawP=1.30e-29;adjP=1.17e-26
gene:	GAA, NDUFB6, UQCRB, CPT2, UQCR10, SLC25A13, GYG1, ATP5J, ECI1, BLOC1S1, SUOX, HADHB, UQCRC2, NDUFB8, ETFA, ACAA2, SUCLG2, NDUFV3, NDUFB9, NDUFA6, NDUFA10, DLD, FXN, NDUFS2, DYRK2, ACADS, COQ7, MICAL1, HADHA, FH, PDHB, ATP5F1, SLC25A4, FDX1L, GNG10, NDUFS3, CAB39, COX5A, ADIPOR1, UQCRH, APOA4, NDUFA8, TXN2, COX6B1, GNG12, NDUFS6, NDUFA4, COX6C, ETFB, NDUFS7, NDUFS4, NDUFB2, ADCY6, UQCR11, NDUFA12,…
biological process	energy derivation by oxidation of organic compounds	C=329;O=105;E=33.96;R=3.09;rawP=1.92e-27;adjP=1.38e-24
gene:	GAA, NDUFA5, NDUFC2, NDUFB6, GNG11, SUCLG1, UQCRB, GNG3, UQCR10, SLC25A13, NDUFB5, SOD2, IDH2, NDUFAB1, GYG1, NDUFA13, NDUFB11, ATP5J, SDHA, BLOC1S1, NDUFB3, UQCRFS1, ABCC8, ADCY2, UQCRC2, NDUFB8, ETFA, SUCLG2, NDUFV3, NDUFB9, NDUFA6, NDUFA10, DLD, FXN, NDUFS2, GNG5, DYRK2, NDUFA9, COX7C, COQ7, UQCRQ, IDH3A, FH, ACO1, NDUFA7, OGDH, PDHB, MAT2A, ATP5D, ATP5F1, GNG2, ALDH5A1, SLC25A4, GNG10, NDUFA1…
biological process	generation of precursor metabolites and energy	C=451;O=126;E=46.55;R=2.71;rawP=1.25e-26;adjP=7.48e-24
gene:	ATP7A, GAA, NDUFA5, NDUFC2, NDUFB6, GNG11, SUCLG1, GNPDA1, UQCRB, GNG3, UQCR10, SLC25A13, TMX4, NDUFB5, SOD2, SLC25A3, IDH2, NDUFAB1, GYG1, NDUFA13, NDUFB11, ATP5J, SDHA, FDX1, BLOC1S1, NDUFB3, UQCRFS1, ABCC8, ADCY2, LDHC, UQCRC2, NDUFB8, ETFA, SUCLG2, NDUFV3, NDUFB9, NDUFA6, PGK2, NDUFA10, DLD, FXN, NDUFS2, GNG5, DYRK2, NDUFA9, PDHA1, COX7C, COQ7, UQCRQ, IDH3A, FH, ACO1, NDUFA7, OGDH, PDHB, MAT2…
biological process	oxidative phosphorylation	C=69;O=43;E=7.12;R=6.04;rawP=1.08e-25;adjP=5.54e-23
gene:	ATP7A, NDUFA5, NDUFC2, NDUFB6, UQCRB, UQCR10, MECP2, NDUFS6, NDUFB5, NDUFA4, CHCHD10, NDUFAB1, NDUFS7, NDUFS4, NDUFB3, NDUFV1, NDUFA2, NDUFB4, NDUFB2, NDUFB8, MSH2, UQCRC2, NDUFV3, NDUFB9, NDUFS8, NDUFA6, NDUFA10, DLD, FXN, NDUFA3, NDUFS2, NDUFA9, COQ7, NDUFA7, NDUFB10, ATP5D, NDUFA1, SURF1, NDUFS3, UQCRH, NDUFS5, NDUFB7, NDUFA8
biological process	small molecule metabolic process	C=2515;O=403;E=259.58;R=1.55;rawP=7.45e-23;adjP=3.34e-20
gene:	SLCO1A2, NDUFB6, SLC25A13, AARS2, HEXB, CSAD, GLUD1, GYG1, RASIP1, SIN3A, OAT, SARS2, ASAP2, NDUFB8, SUCLG2, NDUFA10, DLD, GLDC, SMPD2, ACADS, PDHA1, GSTZ1, COQ7, ALDH1L2, GNL3, FH, RNF213, DCT, NDST1, SLC16A8, GNAI1, PYCR1, PMM1, SLC25A4, CRK, PFAS, GNG10, PSMD8, NDUFS3, COX5A, UQCRH, APOA4, TXN2, PDPR, DLAT, GNG12, ALDH6A1, LARS2, GALT, B3GAT3, B4GALT1, NDUFA4, ATP4A, ISYNA1, COX6C, PSMD9, PDXD…
biological process	mitochondrial electron transport, NADH to ubiquinone	C=43;O=31;E=4.44;R=6.98;rawP=8.96e-22;adjP=3.57e-19
gene:	NDUFA9, NDUFA5, NDUFC2, NDUFB6, NDUFS6, NDUFB5, NDUFA4, NDUFAB1, NDUFA7, NDUFS7, NDUFB10, NDUFS4, NDUFB3, NDUFV1, NDUFA2, NDUFB4, NDUFB2, NDUFA1, NDUFB8, NDUFS3, NDUFV3, NDUFB9, NDUFS8, NDUFS5, NDUFA6, NDUFB7, NDUFA8, NDUFA10, DLD, NDUFA3, NDUFS2
biological process	mitochondrial ATP synthesis coupled electron transport	C=58;O=36;E=5.99;R=6.01;rawP=1.24e-21;adjP=4.05e-19
gene:	NDUFA5, NDUFC2, NDUFB6, UQCRB, UQCR10, MECP2, NDUFS6, NDUFB5, NDUFA4, NDUFAB1, NDUFS7, NDUFS4, NDUFB3, NDUFV1, NDUFA2, NDUFB4, NDUFB2, NDUFB8, NDUFV3, NDUFB9, NDUFS8, NDUFA6, NDUFA10, DLD, NDUFA3, NDUFS2, NDUFA9, COQ7, NDUFA7, NDUFB10, NDUFA1, NDUFS3, UQCRH, NDUFS5, NDUFB7, NDUFA8
molecular function	catalytic activity	C=5371;O=721;E=530.28;R=1.36;rawP=1.36e-26;adjP=1.20e-23
gene:	AARS2, HEXB, RET, FBXO2, PPP2CB, XIAP, NAT10, GLUD1, SERHL2, EDEM1, TUBG1, USP14, FXN, CPE, FTSJ3, TRNT1, GNL3, PTPRM, RENBP, DCT, TUBA1B, PYCR1, PMM1, PDE6G, BRCA2, PFAS, MYLK, NDUFS3, COX5A, GNPDA2, ATP6V0C, UAP1L1, PDPR, EP400, ALDH6A1, UBA3, GALT, LNPEP, PRMT1, TOP2B, ATP4A, COX6C, MERTK, MYL6B, MYO1C, PCBD2, RABGGTA, GNS, UBE3A, MAPK9, UQCR11, PRMT5, NDUFA12, COQ3, AGL, MCCC2, ABCA9, DHH, UF…
molecular function	NADH dehydrogenase activity	C=44;O=33;E=4.34;R=7.60;rawP=1.24e-24;adjP=2.73e-22
[truncated: 37 more rows]

## Sheet: S5
Table S5: Functional analysis of all the OS proteins
[truncated: 66 more rows]

## Sheet: S6
Table S6: Functional analysis of all the RR proteins
[truncated: 66 more rows]

[truncated: 5 more sheets: S7, S8, S10, S11, S12]
