# Supplementary material for: Integrative subcellular proteomic analysis allows accurate prediction of human disease-causing genes
Source: HighWire-hosted journal article supplement (doi:10.1101/gr.198911.115), 2016-02-24
Supplement: Supplemental_TableS9_Reference.docx [file Supplemental_TableS9_Reference.docx]

**Table S9. The proteomic information and literature record of 124 well documented proteins that can cause retinal disease in human**

Localization information is based on literature record. Green ones are consistent with protein OS enrichment score prediction, and red ones are inconsistent.

**Abbreviation**:

**ar**: autosomal recessive; **ad**: autosomal dominant; **xl**: X-linked
**CRD**: Cone-rod dystrophy; **MD**: Macular degeneration; **RP**: Retinitis pigmentosa; **USH**: Usher syndrome; **LCA**: Leber congenital amaurosis; **BBS**: Bardet-Biedl syndrome; **CSNB**: Congenital stationary night blindness; **OA**: Optic atrophy; **DEAF**: Deaf alone; CA: Chorioretinal atrophy; **SYNR**: Syndromic/systemic diseases with retinopathy; **OR**: Other retinopathy.
**OS**: Outer segment; **IS**: Inner segment; **CC**: Connecting cilium; **TZ**: Transition zone; **BB**: Basal body; **PC**: Primary cilium; **CB**: Ciliary body; **CE**: Ciliary epithelium; **RPE**: Retinal pigment epithelium; **ONL**: Outer nuclear layer; **INL**: Inner nuclear layer; **GCL**: Ganglion cell layer; **IPL**: Inner plexiform layer; **ILM**: Internal limiting membrane; **TR**: Throughout the retina; **SSPR**: Subretinal Space between Photoreceptor and RPE

| **Mouse gene** | **Human homolog** | **Abundance (OS)** | **Abundance (RR)** | **Enrichment (OS/RR)** | **Disease** | **Localization** | **Animal model** | **Reference** |
| --- | --- | --- | --- | --- | --- | --- | --- | --- |
| *Abca4* | *ABCA4* | 1.348612 | 0.226769 | 1.918 | ar_CRD, ar_MD, ar_RP | OS | Mouse_Retina | ([Han et al. 2012](#_ENREF_29)) |
| *Adam9* | *ADAM9* | 0.037528 | 0 | 2.563 | ar_CRD | OS-RPE junction | Mouse_Retina | ([Parry et al. 2009b](#_ENREF_68)) |
| *Ahi1* | *AHI1* | 0.124802 | 0 | 3.877 | ar_SYNR | TZ | Mouse_Retina | ([Westfall et al. 2010](#_ENREF_97)) |
| *Aipl1* | *AIPL1* | 0.549279 | 0.053463 | 2.391 | ad_CRD, ar_LCA | OS | Mouse_Retina | ([Ramamurthy et al. 2003](#_ENREF_74)) |
| *Alms1* | *ALMS1* | 0.018132 | 0 | 3.353 | ar_SYNR | Centrosomes,BB | Mouse_Kidney | ([Li et al. 2007](#_ENREF_51)) |
| *Arl6* | *ARL6* | 3.527705 | 0.595092 | 1.655 | ar_BBS | OS,GCL,IPL,OPL | Mouse_Retina | ([Pretorius et al. 2010](#_ENREF_72)) |
| *Bbip1* | *BBIP1* | 1.586176 | 0 | 3.715 | ar_BBS | Centrosome,BB,TZ | RPE cells | ([Loktev et al. 2008](#_ENREF_52)) |
| *Bbs1* | *BBS1* | 3.545595 | 0.039177 | 4.176 | ar_BBS, ar_RP | Centrosome,BB,TZ | Mouse_Retina | ([Seo et al. 2013](#_ENREF_82)) |
| *Bbs2* | *BBS2* | 2.810288 | 0.048333 | 3.741 | ar_BBS | Centrosome,BB,TZ | Mouse_Retina | ([Nishimura et al. 2004](#_ENREF_62)) |
| *Bbs4* | *BBS4* | 4.273273 | 0 | 6.809 | ar_BBS | Centrosome,BB,TZ | Mouse_Retina | ([Abd-El-Barr et al. 2007](#_ENREF_1)) |
| *Bbs5* | *BBS5* | 1.79865 | 0.034064 | 3.606 | ar_BBS | Centrosome,BB,TZ | Mouse_Retina | ([Zhang et al. 2013](#_ENREF_107)) |
| *Bbs7* | *BBS7* | 2.432113 | 0.024526 | 4.635 | ar_BBS | Centrosome,BB,TZ | Mouse_Retina | ([Zhang et al. 2013](#_ENREF_107)) |
| *Bbs9* | *BBS9* | 2.62355 | 0 | 6.825 | ar_BBS | Centrosome,BB,TZ | Mouse_Retina | ([Veleri et al. 2012](#_ENREF_93)) |
| *BC027072* | *C2orf71* | 0.016529 | 0 | 2.181 | ar_RP | CC,OS | Zebrafish_Retina | ([Nishimura et al. 2010](#_ENREF_61)) |
| *Cabp4* | *CABP4* | 0.236024 | 0 | 3.213 | ar_CSNB, ar_LCA | OPL | Mouse_Retina | ([Haeseleer et al. 2004](#_ENREF_26)) |
| *Cacna1f* | *CACNA1F* | 0 | 0.005855 | -1.541 | xl_CRD, xl | Ribbon synapse | Zebrafish_Retina | ([Wang et al. 2012](#_ENREF_96)) |
| *Cacna2d4* | *CACNA2D4* | 0.113133 | 0.102124 | 0.093 | ar_CRD | ONL,INL | Mouse_Retina | ([Postel et al. 2013](#_ENREF_70)) |
| *Cc2d2a* | *CC2D2A* | 0.372664 | 0 | 5.437 | ar_SYNR | TZ,CC | Zebrafish_Retina | ([Bachmann-Gagescu et al. 2011](#_ENREF_4)) |
| *Cdhr1* | *CDHR1* | 0.760112 | 0 | 5.569 | ar_CRD | base of OS | Mouse_Retina | ([Yang et al. 2008](#_ENREF_101)) |
| *Cep164* | *CEP164* | 0.063499 | 0 | 3.454 | ar_SYNR | base of PC,Centrosome | hTERT-RPE1 | ([Graser et al. 2007](#_ENREF_22)) |
| *Cep290* | *CEP290* | 1.08839 | 0 | 6.93 | ar_BBS, ar_LCA, ar_SYNR | TZ,CC | Mouse_Retina | ([Rachel et al. 2012](#_ENREF_73)) |
| *Cnga1* | *CNGA1* | 2.71518 | 0 | 6.586 | ar_RP | OS | Mouse_Retina | ([Westfall et al. 2010](#_ENREF_97)) |
| *Cnga3* | *CNGA3* | 0.234794 | 0 | 4.186 | ar_OR | OS | Mouse_Retina | ([Carvalho et al. 2011](#_ENREF_10)) |
| *Cngb1* | *CNGB1* | 2.775173 | 0.035067 | 4.6505 | ar_RP | OS | Mouse_Retina | ([Koch et al. 2012](#_ENREF_44)) |
| *Cnnm4* | *CNNM4* | 0.120374 | 0.015066 | 1.768 | ar_CRD, ar_OR | OPL,IPL,GCL | Mouse_Retina | ([Parry et al. 2009a](#_ENREF_67)) |
| *Col2a1* | *COL2A1* | 0.076545 | 0.064299 | 0.3175 | ad_SYNR | IPL,OPL,ILM,OLM | Mouse_Retina | ([Kaarniranta et al. 2006](#_ENREF_37)) |
| *Crb1* | *CRB1* | 0.026332 | 0 | 2.672 | ar_LCA, ar_RP, ad_OR | OLM | Mouse_Retina | ([van de Pavert et al. 2004](#_ENREF_91)) |
| *Crx* | *CRX* | 0 | 0.254111 | -3.0115 | ad_CRD,ad_LCA,ar_LCA,ad_RP | NBL | Mouse_Retina | ([Katoh et al. 2012](#_ENREF_39)) |
| *Dmd* | *DMD* | 0.053456 | 0.077772 | -0.465 | xl_OR | OPL,IPL,GCL,NFL | Mouse_Retina | ([Fort et al. 2005](#_ENREF_20)) |
| *Elovl4* | *ELOVL4* | 0 | 0.112409 | -2.188 | ad_MD | IS | Mouse_Retina | ([Vasireddy et al. 2006](#_ENREF_92)) |
| *Fam161a* | *FAM161A* | 0.134492 | 0 | 3.32 | ar_RP | CC | Mouse_Retina | ([Di Gioia et al. 2012](#_ENREF_19)) |
| *Gm11744* | *PRCD* | 1.835968 | 0 | 3.643 | ar_RP | OS | Mouse_Retina | ([Skiba et al. 2013](#_ENREF_86)) |
| *Gnat1* | *GNAT1* | 43.53825 | 2.33332 | 2.763 | ad_CSNB, ar_CSNB | OS | Mouse_Retina | ([Hamann et al. 2009](#_ENREF_27)) |
| *Gnat2* | *GNAT2* | 4.200908 | 0.166693 | 2.931 | ar_OR | OS | Mouse_Retina | ([Zencak et al. 2013](#_ENREF_104)) |
| *Gpr179* | *GPR179* | 0 | 0.005066 | -1.544 | ar_CSNB | OPL | Mouse_Retina | ([Klooster et al. 2013](#_ENREF_43)) |
| *Gpr98* | *GPR98* | 0.030141 | 0 | 4.365 | ar_USH | PC,TZ | Mouse_Retina | ([Sahly et al. 2012](#_ENREF_79)) |
| *Grk1* | *GRK1* | 4.780963 | 0.329928 | 2.447 | ar_CSNB | OS | Mouse_Retina | ([Chen et al. 2012](#_ENREF_11)) |
| *Guca1a* | *GUCA1A* | 1.001465 | 0 | 4.342 | ad_CRD | OS | Mouse_Retina | ([Coleman et al. 2004](#_ENREF_15)) |
| *Guca1b* | *GUCA1B* | 0.888798 | 0 | 4.234 | ad_MD, ad_RP | OS | Mouse_Retina | ([Coleman et al. 2004](#_ENREF_15)) |
| *Gucy2e* | *GUCY2D* | 3.66484 | 0.241933 | 2.635 | ad_CRD, ar_LCA | OS | Mouse_Retina | ([Mihelec et al. 2011](#_ENREF_58)) |
| *Hk1* | *HK1* | 0.747054 | 1.61882 | -0.706 | ad_RP | IS,OPL,INL,IPL,GCL | Rat_Retina | ([Reidel et al. 2011](#_ENREF_76); [Wang et al. 2014](#_ENREF_94)) |
| *Ift140* | *IFT140* | 0.060511 | 0.007934 | 1.639 | ar_SYNR | CC | Mouse_Retina | ([Sedmak and Wolfrum 2010](#_ENREF_81)) |
| *Impdh1* | *IMPDH1* | 1.330989 | 0.850262 | 0.254 | ad_LCA, ad_RP | IS | Mouse_Retina | ([Bowne et al. 2006](#_ENREF_8)) |
| *Impg1* | *IMPG1* | 0.902263 | 0.101895 | 1.891 | ad_MD, ar_MD | SSPR | Human_Retina | ([Kuehn and Hageman 1999](#_ENREF_50); [Manes et al. 2013](#_ENREF_56)) |
| *Impg2* | *IMPG2* | 0.184165 | 0.009345 | 2.621 | ar_RP | SSPR | NA | ([Manes et al. 2013](#_ENREF_56)) |
| *Inpp5e* | *INPP5E* | 0.016337 | 0 | 1.597 | ar_BBS, ar_OR | CC,TZ | Zebrafish_Retina | ([Luo et al. 2012](#_ENREF_53)) |
| *Iqcb1* | *IQCB1* | 0.042247 | 0 | 2.547 | ar_LCA, ar_SYNR | Centrosome, CC | Zebrafish_Retina | ([Sang et al. 2011](#_ENREF_80)) |
| *Itm2b* | *ITM2B* | 0.072594 | 0 | 2.17 | ad_OR | INL,GCL | Mouse_Retina | ([Audo et al. 2014](#_ENREF_2)) |
| *Kcnj13* | *KCNJ13* | 2.65598 | 0 | 5.941 | ar_LCA, ar_SYNR | RPE | Mouse_Retina | ([Zhong et al. 2015](#_ENREF_109)) |
| *Kcnv2* | *KCNV2* | 0.022476 | 0.145479 | -1.532 | ar_CRD | ONL | Xenopus oocytes_Retina | ([Czirjak et al. 2007](#_ENREF_17)) |
| *Lca5* | *LCA5* | 0.419061 | 0 | 4.779 | ar_LCA | CC | Mouse_Retina | ([Boldt et al. 2011](#_ENREF_7)) |
| *Lrit3* | *LRIT3* | 0 | 0.124856 | -3.078 | ar_CSNB | OPL | Mouse_Retina | ([Zeitz et al. 2013](#_ENREF_103)) |
| *Lztfl1* | *LZTFL1* | 1.66335 | 0.077699 | 2.678 | ar_BBS | IS,INL | Mouse_Retina | ([Seo et al. 2011](#_ENREF_83)) |
| *Mak* | *MAK* | 0.016678 | 0 | 1.607 | ar_RP | CC,OS | Mouse_Retina | ([Omori et al. 2010](#_ENREF_65)) |
| *Mertk* | *MERTK* | 0.037466 | 0 | 2.669 | ar_RP | OS,RPE | Mouse_Retina | ([Krigel et al. 2010](#_ENREF_49)) |
| *Mfn2* | *MFN2* | 0.184471 | 0.377719 | -0.832 | ad_OA, ad_SYNR | IPL,GCL | Mouse_Retina | ([Williams et al. 2013](#_ENREF_98)) |
| *Mfrp* | *MFRP* | 0.099504 | 0 | 3.287 | ar_OR | CB,CE,RPE | Mouse_Retina | ([Mandal et al. 2006](#_ENREF_55)) |
| *Mks1* | *MKS1* | 0.427883 | 0 | 4.555 | ar_BBS, ar_SYNR | TZ | Mouse_Retina | ([Garcia-Gonzalo et al. 2011](#_ENREF_21)) |
| *Myo7a* | *MYO7A* | 0.062024 | 0.005348 | 3.136 | ar_LCA, ar_USH | PC,TZ | Mouse_Retina | ([Sahly et al. 2012](#_ENREF_79)) |
| *Nmnat1* | *NMNAT1* | 0.207343 | 0 | 3.063 | ar_LCA | CC,OS | Mouse_Retina | ([Koenekoop et al. 2012](#_ENREF_45)) |
| *Nphp1* | *NPHP1* | 0.52261 | 0 | 4.879 | ar_SYNR | TZ | Mouse_Retina | ([Sang et al. 2011](#_ENREF_80)) |
| *Nphp4* | *NPHP4* | 0.247894 | 0 | 4.931 | ar_SYNR | TZ | Mouse_Retina | ([Sang et al. 2011](#_ENREF_80)) |
| *Nr2e3* | *NR2E3* | 0 | 1.034355 | -4.752 | ad_RP, ar_RP | ONL | Mouse_Retina | ([Cheng et al. 2006](#_ENREF_13)) |
| *Nrl* | *NRL* | 0 | 0.221972 | -2.642 | ad_RP, ar_RP | RPE,ONL | Mouse_Retina | ([Kim et al. 2012](#_ENREF_42)) |
| *Oat* | *OAT* | 2.23962 | 1.141345 | 0.549 | ar_OR | TR | Monkey_Retina | ([Bernstein and Wong 1998](#_ENREF_5)) |
| *Ofd1* | *OFD1* | 0.264302 | 0 | 4.653 | xl_RP, xl_SYNR | CC | Mouse_Retina | ([Di Gioia et al. 2012](#_ENREF_19)) |
| *Opa1* | *OPA1* | 0.209083 | 0.224548 | 1.7435 | ad_OA | IPL,GCL | Mouse_Retina | ([Ju et al. 2010](#_ENREF_36)) |
| *Opa3* | *OPA3* | 0.640463 | 0.293895 | 0.791 | ad_SYNR, ar_SYNR | GC,INL,OPL,IS | Mouse_Retina | ([Powell et al. 2011](#_ENREF_71)) |
| *Opn1mw* | *OPN1LW* | 0.619064 | 0.032356 | 2.564 | xl_OR | OS | Mouse_Retina | ([Cheng et al. 2006](#_ENREF_13)) |
| *Opn1sw* | *OPN1SW* | 1.96473 | 0.253407 | 2.132 | ad_OR | OS | Mouse_Retina | ([Daniele et al. 2011](#_ENREF_18)) |
| *Pcdh15* | *PCDH15* | 0.016494 | 0 | 2.26067 | ar_USH, ar_DEAF | PC,TZ | Mouse_Retina | ([Sahly et al. 2012](#_ENREF_79)) |
| *Pde6a* | *PDE6A* | 17.89468 | 0.802301 | 2.929 | ar_RP | ROS | Mouse_Retina | ([Corbo and Cepko 2005](#_ENREF_16)) |
| *Pde6b* | *PDE6B* | 14.50043 | 0.574576 | 3.045 | ar_RP, ad_CRD | ROS | Mouse_Retina | ([Muradov et al. 2012](#_ENREF_60)) |
| *Pde6c* | *PDE6C* | 0.961497 | 0 | 5.608 | ar_CRD | COS | Mouse_Retina | ([Corbo and Cepko 2005](#_ENREF_16)) |
| *Pde6g* | *PDE6G* | 27.86648 | 1.00266 | 3.081 | ar_RP | ROS | Mouse_Retina | ([Cheng et al. 2011](#_ENREF_14)) |
| *Pde6h* | *PDE6H* | 0.633417 | 0 | 2.976 | ar_CRD | COS | Mouse_Retina | ([Kohl et al. 2012](#_ENREF_46)) |
| *Pitpnm3* | *PITPNM3* | 0.091225 | 0.150783 | -0.6885 | ad_CRD | IS | Rat_Retina | ([Tian and Lev 2002](#_ENREF_90)) |
| *Prom1* | *PROM1* | 0.253365 | 0.006019 | 1.01062 | ad_CRD, ad_MD, ar_RP | base of OS | Mouse_Retina | ([Yang et al. 2008](#_ENREF_101)) |
| *Prpf3* | *PRPF3* | 0 | 0.196075 | -3.768 | ad_RP | IS,INL | Mouse_Retina | ([Graziotto et al. 2011](#_ENREF_23)) |
| *Prpf31* | *PRPF31* | 0 | 0.222897 | -3.401 | ad_RP | IS | Zebrafish_Retina | ([Yin et al. 2011](#_ENREF_102)) |
| *Prpf4* | *PRPF4* | 0 | 0.436265 | -4.224 | ad_RP | IS | Zebrafish_Retina | ([Chen et al. 2014](#_ENREF_12)) |
| *Prpf6* | *PRPF6* | 0.034715 | 0.681787 | -3.08 | ad_RP | IS | NA | ([Tanackovic et al. 2011](#_ENREF_89)) |
| *Prpf8* | *PRPF8* | 0.438969 | 1.967415 | -1.678 | ad_RP | IS,INL | Mouse_Retina | ([Graziotto et al. 2011](#_ENREF_23)) |
| *Prph2* | *PRPH2* | 7.045553 | 0.6227 | 2.279 | ad_CRD, ad_MD, ad_RP | OS | Mouse_Retina | ([Singh et al. 2013](#_ENREF_85)) |
| *Rab28* | *RAB28* | 2.129595 | 0 | 5.24 | ar_CRD | CC | Rat_Retina | ([Roosing et al. 2013](#_ENREF_78)) |
| *Rb1* | *RB1* | 0 | 0.050692 | -2.61 | ad_OR | ONL,INL,GC | Mouse_Retina | ([Zhang et al. 2004](#_ENREF_106)) |
| *Rbp3* | *RBP3* | 2.563535 | 0.774424 | 1.087 | ar_RP | OS | Mouse_Retina | ([Kolesnikov et al. 2011](#_ENREF_48)) |
| *Rd3* | *RD3* | 1.157085 | 0.056567 | 3.033 | ar_LCA | OS | Mouse_Retina | ([Azadi et al. 2010](#_ENREF_3)) |
| *Rdh11* | *RDH11* | 0.302224 | 0.314223 | -0.084 | ar_SYNR | IS | Mouse_Retina | ([Kanan et al. 2008](#_ENREF_38)) |
| *Rdh12* | *RDH12* | 2.521748 | 2.684325 | -0.154 | ar_LCA, ad_RP | ONL | Mouse_Retina | ([Marchette et al. 2010](#_ENREF_57)) |
| *Rdh5* | *RDH5* | 0.457952 | 0 | 4.05 | ar_CRD, ar_CSNB | RPE | Mouse_Retina | ([Huang et al. 2009](#_ENREF_32)) |
| *Rgr* | *RGR* | 0.25427 | 0 | 3.331 | ar_RP, ad_CA | RPE, GCL | Bovine_Retina | ([Jiang et al. 1993](#_ENREF_35)) |
| *Rgs9* | *RGS9* | 7.57933 | 0.036231 | 5.471 | ar_OR | OS | Mouse_Retina | ([Lyubarsky et al. 2001](#_ENREF_54)) |
| *Rgs9bp* | *RGS9BP* | 3.829763 | 0.147981 | 3.352 | ar_OR | OS | Mouse_Retina | ([Keresztes et al. 2003](#_ENREF_41)) |
| *Rho* | *RHO* | 12.59179 | 0.770934 | 2.777 | ad_CSNB, ad_RP, ar_RP | OS | Mouse_Retina | ([O'Reilly et al. 2008](#_ENREF_64)) |
| *Rims1* | *RIMS1* | 0 | 0.008653 | -1.0374 | ad_CRD | OPL | Mouse_Retina | ([Regus-Leidig et al. 2009](#_ENREF_75)) |
| *Rlbp1* | *RLBP1* | 7.639733 | 3.142535 | 0.749 | ar_RP, ar_OR | RPE, INL | Mouse_Retina | ([Slezak et al. 2007](#_ENREF_87)) |
| *Rom1* | *ROM1* | 9.976653 | 0.564508 | 2.805 | ad_RP | OS | Mouse_Retina | ([Omori et al. 2010](#_ENREF_65)) |
| *Rp1* | *RP1* | 0.392472 | 0 | 5.846 | ad_RP, ar_RP | OS | Mouse_Retina | ([Omori et al. 2010](#_ENREF_65)) |
| *Rp1l1* | *RP1L1* | 1.389243 | 0.012497 | 4.405 | ad_MD | CC | Mouse_Retina | ([Yamashita et al. 2009](#_ENREF_100)) |
| *Rp2h* | *RP2* | 0.138813 | 0.033475 | 1.184 | xl_RP | OS | Zebrafish_Retina | ([Shu et al. 2011](#_ENREF_84)) |
| *Rpe65* | *RPE65* | 0.162419 | 0 | 3.588 | ar_LCA, ar_RP, ad_RP | RPE | RPE_cell | ([Hamel et al. 1993](#_ENREF_28)) |
| *Rpgr* | *RPGR* | 0.004678 | 0 | 0.842 | xl_RP, xl_CRD, xl_MD | CC | Mouse_Retina | ([Hong et al. 2003](#_ENREF_31)) |
| *Rpgrip1* | *RPGRIP1* | 0.125528 | 0 | 4.1915 | ar_CRD, ar_LCA | CC | Mouse_Retina | ([Zhao et al. 2003](#_ENREF_108)) |
| *Rs1* | *RS1* | 11.88868 | 3.801905 | 0.946 | xl_OR | IS,OS | Mouse_Retina | ([Molday et al. 2012](#_ENREF_59)) |
| *Sag* | *SAG* | 21.2282 | 6.51113 | 0.988 | ar_CSNB, ar_RP | OS,ONL | Mouse_Retina | ([Zhang et al. 2007](#_ENREF_105)) |
| *Sdccag8* | *SDCCAG8* | 0.107727 | 0 | 3.461 | ar_BBS, ar_SYNR | TZ,CC | Mouse_Retina | ([Otto et al. 2010](#_ENREF_66)) |
| *Sema4a* | *SEMA4A* | 0.577076 | 0 | 5.119 | ad_CRD, ad_RP | RPE | Mouse_Retina | ([Nojima et al. 2013](#_ENREF_63)) |
| *Slc24a1* | *SLC24A1* | 0.858439 | 0.01028 | 4.054 | ar_CSNB | IS,ONL,INL,GCL | Mouse_Retina | ([Riazuddin et al. 2010](#_ENREF_77)) |
| *Snrnp200* | *SNRNP200* | 0.365689 | 1.487085 | -1.564 | ad_RP | IS | Mouse_Retina | ([Graziotto et al. 2011](#_ENREF_23)) |
| *Spata7* | *SPATA7* | 0.1629 | 0 | 3.634 | ar_LCA, ar_RP | TZ,CC | Mouse_Retina | ([Wang et al. 2009](#_ENREF_95)) |
| *Timm8a1* | *TIMM8A* | 0.479298 | 0 | 2.887 | xl_OA, xl_SYNR | Mitochondria | NA | ([Binder et al. 2003](#_ENREF_6)) |
| *Tmem126a* | *TMEM126A* | 0.49025 | 0.297467 | 0.336 | ar_OA | GCL,INP,OPL | Mouse_Retina | ([Hanein et al. 2013](#_ENREF_30)) |
| *Tmem237* | *TMEM237* | 0.165998 | 0 | 3.3325 | ar_SYNR | TZ | IMCD-3 cell | ([Huang et al. 2011](#_ENREF_33)) |
| *Trpm1* | *TRPM1* | 0.005192 | 0.081278 | -2.594 | ar_CSNB | INL | Mouse_Retina | ([Koike et al. 2010](#_ENREF_47)) |
| *Ttc8* | *TTC8* | 1.420379 | 0 | 5.687 | ar_BBS, ar_RP | CC | Mouse_Retina | ([Tadenev et al. 2011](#_ENREF_88)) |
| *Tub* | *TUB* | 0.344635 | 0.138675 | 0.94 | ar_SYNR | TR | Mouse_Retina | ([Ikeda et al. 1999](#_ENREF_34)) |
| *Tulp1* | *TULP1* | 1.50197 | 0.923777 | 0.416 | ar_LCA, ar_RP | TZ,IS | Mouse_Retina | ([Xi et al. 2007](#_ENREF_99); [Grossman et al. 2011](#_ENREF_24)) |
| *Unc119* | *UNC119* | 2.01004 | 0.752527 | 0.86 | ad_CRD | IS,OPL | Mouse_Retina | ([Haeseleer 2008](#_ENREF_25)) |
| *Ush2a* | *USH2A* | 0.005676 | 0 | 2.681 | ar_RP, ar_USH | PC,CC | Mouse_Retina | ([Sahly et al. 2012](#_ENREF_79)) |
| *Vcan* | *VCAN* | 0.006493 | 0 | 2.184 | ad_OA, ad_SYNR | ONL,OPL,GCL | Rat_Retina | ([Popp et al. 2004](#_ENREF_69)) |
| *Wdr19* | *WDR19* | 0.015765 | 0 | 2.179 | ar_SYNR | CC | Human_fibroblast | ([Bredrup et al. 2011](#_ENREF_9)) |
| *Wfs1* | *WFS1* | 0.036704 | 0.084961 | -1.106 | ar_SYNR, ad_DEAF | IPL, GCL | Mouse_Retina | ([Kawano et al. 2008](#_ENREF_40)) |
| *Whrn* | *DFNB31* | 0.006503 | 0 | 1.3345 | ar_USH, ar_DEAF | PC,TZ | Mouse_Retina | ([Sahly et al. 2012](#_ENREF_79)) |

**References**

Abd-El-Barr MM, Sykoudis K, Andrabi S, Eichers ER, Pennesi ME, Tan PL, Wilson JH, Katsanis N, Lupski JR, Wu SM. 2007. Impaired photoreceptor protein transport and synaptic transmission in a mouse model of Bardet-Biedl syndrome. *Vision research* **47**(27): 3394-3407.

Audo I, Bujakowska K, Orhan E, El Shamieh S, Sennlaub F, Guillonneau X, Antonio A, Michiels C, Lancelot ME, Letexier M et al. 2014. The familial dementia gene revisited: a missense mutation revealed by whole-exome sequencing identifies ITM2B as a candidate gene underlying a novel autosomal dominant retinal dystrophy in a large family. *Human molecular genetics* **23**(2): 491-501.

Azadi S, Molday LL, Molday RS. 2010. RD3, the protein associated with Leber congenital amaurosis type 12, is required for guanylate cyclase trafficking in photoreceptor cells. *Proceedings of the National Academy of Sciences of the United States of America* **107**(49): 21158-21163.

Bachmann-Gagescu R, Phelps IG, Stearns G, Link BA, Brockerhoff SE, Moens CB, Doherty D. 2011. The ciliopathy gene cc2d2a controls zebrafish photoreceptor outer segment development through a role in Rab8-dependent vesicle trafficking. *Human molecular genetics* **20**(20): 4041-4055.

Bernstein SL, Wong P. 1998. Regional expression of disease-related genes in human and monkey retina. *Molecular vision* **4**: 24.

Binder J, Hofmann S, Kreisel S, Wohrle JC, Bazner H, Krauss JK, Hennerici MG, Bauer MF. 2003. Clinical and molecular findings in a patient with a novel mutation in the deafness-dystonia peptide (DDP1) gene. *Brain : a journal of neurology* **126**(Pt 8): 1814-1820.

Boldt K, Mans DA, Won J, van Reeuwijk J, Vogt A, Kinkl N, Letteboer SJ, Hicks WL, Hurd RE, Naggert JK et al. 2011. Disruption of intraflagellar protein transport in photoreceptor cilia causes Leber congenital amaurosis in humans and mice. *The Journal of clinical investigation* **121**(6): 2169-2180.

Bowne SJ, Liu Q, Sullivan LS, Zhu J, Spellicy CJ, Rickman CB, Pierce EA, Daiger SP. 2006. Why do mutations in the ubiquitously expressed housekeeping gene IMPDH1 cause retina-specific photoreceptor degeneration? *Investigative ophthalmology & visual science* **47**(9): 3754-3765.

Bredrup C, Saunier S, Oud MM, Fiskerstrand T, Hoischen A, Brackman D, Leh SM, Midtbo M, Filhol E, Bole-Feysot C et al. 2011. Ciliopathies with skeletal anomalies and renal insufficiency due to mutations in the IFT-A gene WDR19. *American journal of human genetics* **89**(5): 634-643.

Carvalho LS, Xu J, Pearson RA, Smith AJ, Bainbridge JW, Morris LM, Fliesler SJ, Ding XQ, Ali RR. 2011. Long-term and age-dependent restoration of visual function in a mouse model of CNGB3-associated achromatopsia following gene therapy. *Human molecular genetics* **20**(16): 3161-3175.

Chen CK, Woodruff ML, Chen FS, Chen Y, Cilluffo MC, Tranchina D, Fain GL. 2012. Modulation of mouse rod response decay by rhodopsin kinase and recoverin. *The Journal of neuroscience : the official journal of the Society for Neuroscience* **32**(45): 15998-16006.

Chen X, Liu Y, Sheng X, Tam PO, Zhao K, Chen X, Rong W, Liu Y, Liu X, Pan X et al. 2014. PRPF4 mutations cause autosomal dominant retinitis pigmentosa. *Human molecular genetics* **23**(11): 2926-2939.

Cheng H, Aleman TS, Cideciyan AV, Khanna R, Jacobson SG, Swaroop A. 2006. In vivo function of the orphan nuclear receptor NR2E3 in establishing photoreceptor identity during mammalian retinal development. *Human molecular genetics* **15**(17): 2588-2602.

Cheng H, Khan NW, Roger JE, Swaroop A. 2011. Excess cones in the retinal degeneration rd7 mouse, caused by the loss of function of orphan nuclear receptor Nr2e3, originate from early-born photoreceptor precursors. *Human molecular genetics* **20**(21): 4102-4115.

Coleman JE, Zhang Y, Brown GA, Semple-Rowland SL. 2004. Cone cell survival and downregulation of GCAP1 protein in the retinas of GC1 knockout mice. *Investigative ophthalmology & visual science* **45**(10): 3397-3403.

Corbo JC, Cepko CL. 2005. A hybrid photoreceptor expressing both rod and cone genes in a mouse model of enhanced S-cone syndrome. *PLoS genetics* **1**(2): e11.

Czirjak G, Toth ZE, Enyedi P. 2007. Characterization of the heteromeric potassium channel formed by kv2.1 and the retinal subunit kv8.2 in Xenopus oocytes. *Journal of neurophysiology* **98**(3): 1213-1222.

Daniele LL, Insinna C, Chance R, Wang J, Nikonov SS, Pugh EN, Jr. 2011. A mouse M-opsin monochromat: retinal cone photoreceptors have increased M-opsin expression when S-opsin is knocked out. *Vision research* **51**(4): 447-458.

Di Gioia SA, Letteboer SJ, Kostic C, Bandah-Rozenfeld D, Hetterschijt L, Sharon D, Arsenijevic Y, Roepman R, Rivolta C. 2012. FAM161A, associated with retinitis pigmentosa, is a component of the cilia-basal body complex and interacts with proteins involved in ciliopathies. *Human molecular genetics* **21**(23): 5174-5184.

Fort P, Estrada FJ, Bordais A, Mornet D, Sahel JA, Picaud S, Vargas HR, Coral-Vazquez RM, Rendon A. 2005. The sarcoglycan-sarcospan complex localization in mouse retina is independent from dystrophins. *Neuroscience research* **53**(1): 25-33.

Garcia-Gonzalo FR, Corbit KC, Sirerol-Piquer MS, Ramaswami G, Otto EA, Noriega TR, Seol AD, Robinson JF, Bennett CL, Josifova DJ et al. 2011. A transition zone complex regulates mammalian ciliogenesis and ciliary membrane composition. *Nature genetics* **43**(8): 776-784.

Graser S, Stierhof YD, Lavoie SB, Gassner OS, Lamla S, Le Clech M, Nigg EA. 2007. Cep164, a novel centriole appendage protein required for primary cilium formation. *The Journal of cell biology* **179**(2): 321-330.

Graziotto JJ, Farkas MH, Bujakowska K, Deramaudt BM, Zhang Q, Nandrot EF, Inglehearn CF, Bhattacharya SS, Pierce EA. 2011. Three gene-targeted mouse models of RNA splicing factor RP show late-onset RPE and retinal degeneration. *Investigative ophthalmology & visual science* **52**(1): 190-198.

Grossman GH, Watson RF, Pauer GJ, Bollinger K, Hagstrom SA. 2011. Immunocytochemical evidence of Tulp1-dependent outer segment protein transport pathways in photoreceptor cells. *Experimental eye research* **93**(5): 658-668.

Haeseleer F. 2008. Interaction and colocalization of CaBP4 and Unc119 (MRG4) in photoreceptors. *Investigative ophthalmology & visual science* **49**(6): 2366-2375.

Haeseleer F, Imanishi Y, Maeda T, Possin DE, Maeda A, Lee A, Rieke F, Palczewski K. 2004. Essential role of Ca2+-binding protein 4, a Cav1.4 channel regulator, in photoreceptor synaptic function. *Nature neuroscience* **7**(10): 1079-1087.

Hamann S, Schorderet DF, Cottet S. 2009. Bax-induced apoptosis in Leber's congenital amaurosis: a dual role in rod and cone degeneration. *PloS one* **4**(8): e6616.

Hamel CP, Tsilou E, Pfeffer BA, Hooks JJ, Detrick B, Redmond TM. 1993. Molecular cloning and expression of RPE65, a novel retinal pigment epithelium-specific microsomal protein that is post-transcriptionally regulated in vitro. *The Journal of biological chemistry* **268**(21): 15751-15757.

Han Z, Conley SM, Makkia RS, Cooper MJ, Naash MI. 2012. DNA nanoparticle-mediated ABCA4 delivery rescues Stargardt dystrophy in mice. *The Journal of clinical investigation* **122**(9): 3221-3226.

Hanein S, Garcia M, Fares-Taie L, Serre V, De Keyzer Y, Delaveau T, Perrault I, Delphin N, Gerber S, Schmitt A et al. 2013. TMEM126A is a mitochondrial located mRNA (MLR) protein of the mitochondrial inner membrane. *Biochimica et biophysica acta* **1830**(6): 3719-3733.

Hong DH, Pawlyk B, Sokolov M, Strissel KJ, Yang J, Tulloch B, Wright AF, Arshavsky VY, Li T. 2003. RPGR isoforms in photoreceptor connecting cilia and the transitional zone of motile cilia. *Investigative ophthalmology & visual science* **44**(6): 2413-2421.

Huang J, Possin DE, Saari JC. 2009. Localizations of visual cycle components in retinal pigment epithelium. *Molecular vision* **15**: 223-234.

Huang L, Szymanska K, Jensen VL, Janecke AR, Innes AM, Davis EE, Frosk P, Li C, Willer JR, Chodirker BN et al. 2011. TMEM237 is mutated in individuals with a Joubert syndrome related disorder and expands the role of the TMEM family at the ciliary transition zone. *American journal of human genetics* **89**(6): 713-730.

Ikeda S, He W, Ikeda A, Naggert JK, North MA, Nishina PM. 1999. Cell-specific expression of tubby gene family members (tub, Tulp1,2, and 3) in the retina. *Investigative ophthalmology & visual science* **40**(11): 2706-2712.

Jiang M, Pandey S, Fong HK. 1993. An opsin homologue in the retina and pigment epithelium. *Investigative ophthalmology & visual science* **34**(13): 3669-3678.

Ju WK, Kim KY, Duong-Polk KX, Lindsey JD, Ellisman MH, Weinreb RN. 2010. Increased optic atrophy type 1 expression protects retinal ganglion cells in a mouse model of glaucoma. *Molecular vision* **16**: 1331-1342.

Kaarniranta K, Ihanamaki T, Sahlman J, Pulkkinen H, Uusitalo H, Arita M, Tammi R, Lammi MJ, Helminen HJ. 2006. A mouse model for Stickler's syndrome: ocular phenotype of mice carrying a targeted heterozygous inactivation of type II (pro)collagen gene (Col2a1). *Experimental eye research* **83**(2): 297-303.

Kanan Y, Wicker LD, Al-Ubaidi MR, Mandal NA, Kasus-Jacobi A. 2008. Retinol dehydrogenases RDH11 and RDH12 in the mouse retina: expression levels during development and regulation by oxidative stress. *Investigative ophthalmology & visual science* **49**(3): 1071-1078.

Katoh K, Yamazaki R, Onishi A, Sanuki R, Furukawa T. 2012. G9a histone methyltransferase activity in retinal progenitors is essential for proper differentiation and survival of mouse retinal cells. *The Journal of neuroscience : the official journal of the Society for Neuroscience* **32**(49): 17658-17670.

Kawano J, Tanizawa Y, Shinoda K. 2008. Wolfram syndrome 1 (Wfs1) gene expression in the normal mouse visual system. *The Journal of comparative neurology* **510**(1): 1-23.

Keresztes G, Mutai H, Hibino H, Hudspeth AJ, Heller S. 2003. Expression patterns of the RGS9-1 anchoring protein R9AP in the chicken and mouse suggest multiple roles in the nervous system. *Molecular and cellular neurosciences* **24**(3): 687-695.

Kim JW, Jang SM, Kim CH, An JH, Choi KH. 2012. Transcriptional activity of neural retina leucine zipper (Nrl) is regulated by c-Jun N-terminal kinase and Tip60 during retina development. *Molecular and cellular biology* **32**(9): 1720-1732.

Klooster J, van Genderen MM, Yu M, Florijn RJ, Riemslag FC, Bergen AA, Gregg RG, Peachey NS, Kamermans M. 2013. Ultrastructural localization of GPR179 and the impact of mutant forms on retinal function in CSNB1 patients and a mouse model. *Investigative ophthalmology & visual science* **54**(10): 6973-6981.

Koch S, Sothilingam V, Garcia Garrido M, Tanimoto N, Becirovic E, Koch F, Seide C, Beck SC, Seeliger MW, Biel M et al. 2012. Gene therapy restores vision and delays degeneration in the CNGB1(-/-) mouse model of retinitis pigmentosa. *Human molecular genetics* **21**(20): 4486-4496.

Koenekoop RK, Wang H, Majewski J, Wang X, Lopez I, Ren H, Chen Y, Li Y, Fishman GA, Genead M et al. 2012. Mutations in NMNAT1 cause Leber congenital amaurosis and identify a new disease pathway for retinal degeneration. *Nature genetics* **44**(9): 1035-1039.

Kohl S, Coppieters F, Meire F, Schaich S, Roosing S, Brennenstuhl C, Bolz S, van Genderen MM, Riemslag FC, European Retinal Disease C et al. 2012. A nonsense mutation in PDE6H causes autosomal-recessive incomplete achromatopsia. *American journal of human genetics* **91**(3): 527-532.

Koike C, Obara T, Uriu Y, Numata T, Sanuki R, Miyata K, Koyasu T, Ueno S, Funabiki K, Tani A et al. 2010. TRPM1 is a component of the retinal ON bipolar cell transduction channel in the mGluR6 cascade. *Proceedings of the National Academy of Sciences of the United States of America* **107**(1): 332-337.

Kolesnikov AV, Tang PH, Parker RO, Crouch RK, Kefalov VJ. 2011. The mammalian cone visual cycle promotes rapid M/L-cone pigment regeneration independently of the interphotoreceptor retinoid-binding protein. *The Journal of neuroscience : the official journal of the Society for Neuroscience* **31**(21): 7900-7909.

Krigel A, Felder-Schmittbuhl MP, Hicks D. 2010. Circadian-clock driven cone-like photoreceptor phagocytosis in the neural retina leucine zipper gene knockout mouse. *Molecular vision* **16**: 2873-2881.

Kuehn MH, Hageman GS. 1999. Expression and characterization of the IPM 150 gene (IMPG1) product, a novel human photoreceptor cell-associated chondroitin-sulfate proteoglycan. *Matrix biology : journal of the International Society for Matrix Biology* **18**(5): 509-518.

Li G, Vega R, Nelms K, Gekakis N, Goodnow C, McNamara P, Wu H, Hong NA, Glynne R. 2007. A role for Alstrom syndrome protein, alms1, in kidney ciliogenesis and cellular quiescence. *PLoS genetics* **3**(1): e8.

Loktev AV, Zhang Q, Beck JS, Searby CC, Scheetz TE, Bazan JF, Slusarski DC, Sheffield VC, Jackson PK, Nachury MV. 2008. A BBSome subunit links ciliogenesis, microtubule stability, and acetylation. *Developmental cell* **15**(6): 854-865.

Luo N, Lu J, Sun Y. 2012. Evidence of a role of inositol polyphosphate 5-phosphatase INPP5E in cilia formation in zebrafish. *Vision research* **75**: 98-107.

Lyubarsky AL, Naarendorp F, Zhang X, Wensel T, Simon MI, Pugh EN, Jr. 2001. RGS9-1 is required for normal inactivation of mouse cone phototransduction. *Molecular vision* **7**: 71-78.

Mandal MN, Vasireddy V, Jablonski MM, Wang X, Heckenlively JR, Hughes BA, Reddy GB, Ayyagari R. 2006. Spatial and temporal expression of MFRP and its interaction with CTRP5. *Investigative ophthalmology & visual science* **47**(12): 5514-5521.

Manes G, Meunier I, Avila-Fernandez A, Banfi S, Le Meur G, Zanlonghi X, Corton M, Simonelli F, Brabet P, Labesse G et al. 2013. Mutations in IMPG1 cause vitelliform macular dystrophies. *American journal of human genetics* **93**(3): 571-578.

Marchette LD, Thompson DA, Kravtsova M, Ngansop TN, Mandal MN, Kasus-Jacobi A. 2010. Retinol dehydrogenase 12 detoxifies 4-hydroxynonenal in photoreceptor cells. *Free radical biology & medicine* **48**(1): 16-25.

Mihelec M, Pearson RA, Robbie SJ, Buch PK, Azam SA, Bainbridge JW, Smith AJ, Ali RR. 2011. Long-term preservation of cones and improvement in visual function following gene therapy in a mouse model of leber congenital amaurosis caused by guanylate cyclase-1 deficiency. *Human gene therapy* **22**(10): 1179-1190.

Molday RS, Kellner U, Weber BH. 2012. X-linked juvenile retinoschisis: clinical diagnosis, genetic analysis, and molecular mechanisms. *Progress in retinal and eye research* **31**(3): 195-212.

Muradov H, Boyd KK, Kerov V, Artemyev NO. 2012. Atypical retinal degeneration 3 in mice is caused by defective PDE6B pre-mRNA splicing. *Vision research* **57**: 1-8.

Nishimura DY, Baye LM, Perveen R, Searby CC, Avila-Fernandez A, Pereiro I, Ayuso C, Valverde D, Bishop PN, Manson FD et al. 2010. Discovery and functional analysis of a retinitis pigmentosa gene, C2ORF71. *American journal of human genetics* **86**(5): 686-695.

Nishimura DY, Fath M, Mullins RF, Searby C, Andrews M, Davis R, Andorf JL, Mykytyn K, Swiderski RE, Yang B et al. 2004. Bbs2-null mice have neurosensory deficits, a defect in social dominance, and retinopathy associated with mislocalization of rhodopsin. *Proceedings of the National Academy of Sciences of the United States of America* **101**(47): 16588-16593.

Nojima S, Toyofuku T, Kamao H, Ishigami C, Kaneko J, Okuno T, Takamatsu H, Ito D, Kang S, Kimura T et al. 2013. A point mutation in Semaphorin 4A associates with defective endosomal sorting and causes retinal degeneration. *Nature communications* **4**: 1406.

O'Reilly M, Millington-Ward S, Palfi A, Chadderton N, Cronin T, McNally N, Humphries MM, Humphries P, Kenna PF, Farrar GJ. 2008. A transgenic mouse model for gene therapy of rhodopsin-linked Retinitis Pigmentosa. *Vision research* **48**(3): 386-391.

Omori Y, Chaya T, Katoh K, Kajimura N, Sato S, Muraoka K, Ueno S, Koyasu T, Kondo M, Furukawa T. 2010. Negative regulation of ciliary length by ciliary male germ cell-associated kinase (Mak) is required for retinal photoreceptor survival. *Proceedings of the National Academy of Sciences of the United States of America* **107**(52): 22671-22676.

Otto EA, Hurd TW, Airik R, Chaki M, Zhou W, Stoetzel C, Patil SB, Levy S, Ghosh AK, Murga-Zamalloa CA et al. 2010. Candidate exome capture identifies mutation of SDCCAG8 as the cause of a retinal-renal ciliopathy. *Nature genetics* **42**(10): 840-850.

Parry DA, Mighell AJ, El-Sayed W, Shore RC, Jalili IK, Dollfus H, Bloch-Zupan A, Carlos R, Carr IM, Downey LM et al. 2009a. Mutations in CNNM4 cause Jalili syndrome, consisting of autosomal-recessive cone-rod dystrophy and amelogenesis imperfecta. *American journal of human genetics* **84**(2): 266-273.

Parry DA, Toomes C, Bida L, Danciger M, Towns KV, McKibbin M, Jacobson SG, Logan CV, Ali M, Bond J et al. 2009b. Loss of the metalloprotease ADAM9 leads to cone-rod dystrophy in humans and retinal degeneration in mice. *American journal of human genetics* **84**(5): 683-691.

Popp S, Maurel P, Andersen JS, Margolis RU. 2004. Developmental changes of aggrecan, versican and neurocan in the retina and optic nerve. *Experimental eye research* **79**(3): 351-356.

Postel K, Bellmann J, Splith V, Ader M. 2013. Analysis of cell surface markers specific for transplantable rod photoreceptors. *Molecular vision* **19**: 2058-2067.

Powell KA, Davies JR, Taylor E, Wride MA, Votruba M. 2011. Mitochondrial localization and ocular expression of mutant Opa3 in a mouse model of 3-methylglutaconicaciduria type III. *Investigative ophthalmology & visual science* **52**(7): 4369-4380.

Pretorius PR, Baye LM, Nishimura DY, Searby CC, Bugge K, Yang B, Mullins RF, Stone EM, Sheffield VC, Slusarski DC. 2010. Identification and functional analysis of the vision-specific BBS3 (ARL6) long isoform. *PLoS genetics* **6**(3): e1000884.

Rachel RA, May-Simera HL, Veleri S, Gotoh N, Choi BY, Murga-Zamalloa C, McIntyre JC, Marek J, Lopez I, Hackett AN et al. 2012. Combining Cep290 and Mkks ciliopathy alleles in mice rescues sensory defects and restores ciliogenesis. *The Journal of clinical investigation* **122**(4): 1233-1245.

Ramamurthy V, Roberts M, van den Akker F, Niemi G, Reh TA, Hurley JB. 2003. AIPL1, a protein implicated in Leber's congenital amaurosis, interacts with and aids in processing of farnesylated proteins. *Proceedings of the National Academy of Sciences of the United States of America* **100**(22): 12630-12635.

Regus-Leidig H, Tom Dieck S, Specht D, Meyer L, Brandstatter JH. 2009. Early steps in the assembly of photoreceptor ribbon synapses in the mouse retina: the involvement of precursor spheres. *The Journal of comparative neurology* **512**(6): 814-824.

Reidel B, Thompson JW, Farsiu S, Moseley MA, Skiba NP, Arshavsky VY. 2011. Proteomic profiling of a layered tissue reveals unique glycolytic specializations of photoreceptor cells. *Molecular & cellular proteomics : MCP* **10**(3): M110 002469.

Riazuddin SA, Shahzadi A, Zeitz C, Ahmed ZM, Ayyagari R, Chavali VR, Ponferrada VG, Audo I, Michiels C, Lancelot ME et al. 2010. A mutation in SLC24A1 implicated in autosomal-recessive congenital stationary night blindness. *American journal of human genetics* **87**(4): 523-531.

Roosing S, Rohrschneider K, Beryozkin A, Sharon D, Weisschuh N, Staller J, Kohl S, Zelinger L, Peters TA, Neveling K et al. 2013. Mutations in RAB28, encoding a farnesylated small GTPase, are associated with autosomal-recessive cone-rod dystrophy. *American journal of human genetics* **93**(1): 110-117.

Sahly I, Dufour E, Schietroma C, Michel V, Bahloul A, Perfettini I, Pepermans E, Estivalet A, Carette D, Aghaie A et al. 2012. Localization of Usher 1 proteins to the photoreceptor calyceal processes, which are absent from mice. *The Journal of cell biology* **199**(2): 381-399.

Sang L, Miller JJ, Corbit KC, Giles RH, Brauer MJ, Otto EA, Baye LM, Wen X, Scales SJ, Kwong M et al. 2011. Mapping the NPHP-JBTS-MKS protein network reveals ciliopathy disease genes and pathways. *Cell* **145**(4): 513-528.

Sedmak T, Wolfrum U. 2010. Intraflagellar transport molecules in ciliary and nonciliary cells of the retina. *The Journal of cell biology* **189**(1): 171-186.

Seo S, Mullins RF, Dumitrescu AV, Bhattarai S, Gratie D, Wang K, Stone EM, Sheffield V, Drack AV. 2013. Subretinal gene therapy of mice with Bardet-Biedl syndrome type 1. *Investigative ophthalmology & visual science* **54**(9): 6118-6132.

Seo S, Zhang Q, Bugge K, Breslow DK, Searby CC, Nachury MV, Sheffield VC. 2011. A novel protein LZTFL1 regulates ciliary trafficking of the BBSome and Smoothened. *PLoS genetics* **7**(11): e1002358.

Shu X, Zeng Z, Gautier P, Lennon A, Gakovic M, Cheetham ME, Patton EE, Wright AF. 2011. Knockdown of the zebrafish ortholog of the retinitis pigmentosa 2 (RP2) gene results in retinal degeneration. *Investigative ophthalmology & visual science* **52**(6): 2960-2966.

Singh MS, Charbel Issa P, Butler R, Martin C, Lipinski DM, Sekaran S, Barnard AR, MacLaren RE. 2013. Reversal of end-stage retinal degeneration and restoration of visual function by photoreceptor transplantation. *Proceedings of the National Academy of Sciences of the United States of America* **110**(3): 1101-1106.

Skiba NP, Spencer WJ, Salinas RY, Lieu EC, Thompson JW, Arshavsky VY. 2013. Proteomic identification of unique photoreceptor disc components reveals the presence of PRCD, a protein linked to retinal degeneration. *Journal of proteome research* **12**(6): 3010-3018.

Slezak M, Goritz C, Niemiec A, Frisen J, Chambon P, Metzger D, Pfrieger FW. 2007. Transgenic mice for conditional gene manipulation in astroglial cells. *Glia* **55**(15): 1565-1576.

Tadenev AL, Kulaga HM, May-Simera HL, Kelley MW, Katsanis N, Reed RR. 2011. Loss of Bardet-Biedl syndrome protein-8 (BBS8) perturbs olfactory function, protein localization, and axon targeting. *Proceedings of the National Academy of Sciences of the United States of America* **108**(25): 10320-10325.

Tanackovic G, Ransijn A, Ayuso C, Harper S, Berson EL, Rivolta C. 2011. A missense mutation in PRPF6 causes impairment of pre-mRNA splicing and autosomal-dominant retinitis pigmentosa. *American journal of human genetics* **88**(5): 643-649.

Tian D, Lev S. 2002. Cellular and developmental distribution of human homologues of the Drosophilia rdgB protein in the rat retina. *Investigative ophthalmology & visual science* **43**(6): 1946-1953.

van de Pavert SA, Kantardzhieva A, Malysheva A, Meuleman J, Versteeg I, Levelt C, Klooster J, Geiger S, Seeliger MW, Rashbass P et al. 2004. Crumbs homologue 1 is required for maintenance of photoreceptor cell polarization and adhesion during light exposure. *Journal of cell science* **117**(Pt 18): 4169-4177.

Vasireddy V, Jablonski MM, Mandal MN, Raz-Prag D, Wang XF, Nizol L, Iannaccone A, Musch DC, Bush RA, Salem N, Jr. et al. 2006. Elovl4 5-bp-deletion knock-in mice develop progressive photoreceptor degeneration. *Investigative ophthalmology & visual science* **47**(10): 4558-4568.

Veleri S, Bishop K, Dalle Nogare DE, English MA, Foskett TJ, Chitnis A, Sood R, Liu P, Swaroop A. 2012. Knockdown of Bardet-Biedl syndrome gene BBS9/PTHB1 leads to cilia defects. *PloS one* **7**(3): e34389.

Wang F, Wang Y, Zhang B, Zhao L, Lyubasyuk V, Wang K, Xu M, Li Y, Wu F, Wen C et al. 2014. A missense mutation in HK1 leads to autosomal dominant retinitis pigmentosa. *Investigative ophthalmology & visual science* **55**(11): 7159-7164.

Wang H, den Hollander AI, Moayedi Y, Abulimiti A, Li Y, Collin RW, Hoyng CB, Lopez I, Abboud EB, Al-Rajhi AA et al. 2009. Mutations in SPATA7 cause Leber congenital amaurosis and juvenile retinitis pigmentosa. *American journal of human genetics* **84**(3): 380-387.

Wang X, Slebos RJ, Wang D, Halvey PJ, Tabb DL, Liebler DC, Zhang B. 2012. Protein identification using customized protein sequence databases derived from RNA-Seq data. *Journal of proteome research* **11**(2): 1009-1017.

Westfall JE, Hoyt C, Liu Q, Hsiao YC, Pierce EA, Page-McCaw PS, Ferland RJ. 2010. Retinal degeneration and failure of photoreceptor outer segment formation in mice with targeted deletion of the Joubert syndrome gene, Ahi1. *The Journal of neuroscience : the official journal of the Society for Neuroscience* **30**(26): 8759-8768.

Williams PA, Thirgood RA, Oliphant H, Frizzati A, Littlewood E, Votruba M, Good MA, Williams J, Morgan JE. 2013. Retinal ganglion cell dendritic degeneration in a mouse model of Alzheimer's disease. *Neurobiology of aging* **34**(7): 1799-1806.

Xi Q, Pauer GJ, Ball SL, Rayborn M, Hollyfield JG, Peachey NS, Crabb JW, Hagstrom SA. 2007. Interaction between the photoreceptor-specific tubby-like protein 1 and the neuronal-specific GTPase dynamin-1. *Investigative ophthalmology & visual science* **48**(6): 2837-2844.

Yamashita T, Liu J, Gao J, LeNoue S, Wang C, Kaminoh J, Bowne SJ, Sullivan LS, Daiger SP, Zhang K et al. 2009. Essential and synergistic roles of RP1 and RP1L1 in rod photoreceptor axoneme and retinitis pigmentosa. *The Journal of neuroscience : the official journal of the Society for Neuroscience* **29**(31): 9748-9760.

Yang Z, Chen Y, Lillo C, Chien J, Yu Z, Michaelides M, Klein M, Howes KA, Li Y, Kaminoh Y et al. 2008. Mutant prominin 1 found in patients with macular degeneration disrupts photoreceptor disk morphogenesis in mice. *The Journal of clinical investigation* **118**(8): 2908-2916.

Yin J, Brocher J, Fischer U, Winkler C. 2011. Mutant Prpf31 causes pre-mRNA splicing defects and rod photoreceptor cell degeneration in a zebrafish model for Retinitis pigmentosa. *Molecular neurodegeneration* **6**: 56.

Zeitz C, Jacobson SG, Hamel CP, Bujakowska K, Neuille M, Orhan E, Zanlonghi X, Lancelot ME, Michiels C, Schwartz SB et al. 2013. Whole-exome sequencing identifies LRIT3 mutations as a cause of autosomal-recessive complete congenital stationary night blindness. *American journal of human genetics* **92**(1): 67-75.

Zencak D, Schouwey K, Chen D, Ekstrom P, Tanger E, Bremner R, van Lohuizen M, Arsenijevic Y. 2013. Retinal degeneration depends on Bmi1 function and reactivation of cell cycle proteins. *Proceedings of the National Academy of Sciences of the United States of America* **110**(7): E593-601.

Zhang H, Li S, Doan T, Rieke F, Detwiler PB, Frederick JM, Baehr W. 2007. Deletion of PrBP/delta impedes transport of GRK1 and PDE6 catalytic subunits to photoreceptor outer segments. *Proceedings of the National Academy of Sciences of the United States of America* **104**(21): 8857-8862.

Zhang J, Gray J, Wu L, Leone G, Rowan S, Cepko CL, Zhu X, Craft CM, Dyer MA. 2004. Rb regulates proliferation and rod photoreceptor development in the mouse retina. *Nature genetics* **36**(4): 351-360.

Zhang Q, Nishimura D, Vogel T, Shao J, Swiderski R, Yin T, Searby C, Carter CS, Kim G, Bugge K et al. 2013. BBS7 is required for BBSome formation and its absence in mice results in Bardet-Biedl syndrome phenotypes and selective abnormalities in membrane protein trafficking. *Journal of cell science* **126**(Pt 11): 2372-2380.

Zhao Y, Hong DH, Pawlyk B, Yue G, Adamian M, Grynberg M, Godzik A, Li T. 2003. The retinitis pigmentosa GTPase regulator (RPGR)- interacting protein: subserving RPGR function and participating in disk morphogenesis. *Proceedings of the National Academy of Sciences of the United States of America* **100**(7): 3965-3970.

Zhong H, Chen Y, Li Y, Chen R, Mardon G. 2015. CRISPR-engineered mosaicism rapidly reveals that loss of Kcnj13 function in mice mimics human disease phenotypes. *Scientific reports* **5**: 8366.
